# Supplementary material for: Unsupervised Mining of HLA-I Peptidomes Reveals New Binding Motifs and Potential False Positives in the Community Database
Source: Front Immunol. 2022 Mar 21;13:847756. doi: 10.3389/fimmu.2022.847756 (PMC8977642; doi:10.3389/fimmu.2022.847756)
Supplement: Supplementary file 2 [file Table_1.xlsx]

## Sheet: Sheet1
HLA Allele	Peptide	Length	Number of MS/MS Evidence	Best SMSNet Score	Source	Source ID(s)	Predicted Core Motif	Predicted Binding Affinity	Predicted % Rank Eluted Ligand	Predicted % Rank Binding Affinity	Reported in IEDB	Tryptic Status	Is Outlier
A*01:01	AADIFYSRY	9	1	0.664171	Protein	B7ZKR8;Q86UV5-3;Q86UV5-5;B7ZKS3;E9PJH5	AADIFYSRY	57.18	0.039	0.054	TRUE	FALSE	FALSE
A*01:01	AADLNLVLY	9	6	0.79073	Protein	Q6P2E9-2;I3L3M2;Q6P2E9;I3L0V0	AADLNLVLY	41.69	0.021	0.04	TRUE	FALSE	FALSE
A*01:01	AADLVEALY	9	2	0.69112	Protein	I6MBV4;Q658Y5;Q9UH73-2;B4E172;E5RFQ1	AADLVEALY	29.09	0.016	0.027	TRUE	FALSE	FALSE
A*01:01	ADMGHLKY	8	20	0.907754	Protein	P12004;Q6FHF5;Q6FI35	N/A	1648.23	0.367	0.654	TRUE	FALSE	FALSE
A*01:01	AIDEDVLRY	9	26	0.958754	Protein	A0A024R1C1;Q13356;A8K0I0;Q13356-2;B4DRD4	AIDEDVLRY	71.67	0.011	0.066	TRUE	FALSE	FALSE
A*01:01	AIDLLKEIY	9	4	0.91153	Protein	Q93008;O00507;D3DWB6;O00507-2;Q93008-1	AIDLLKEIY	715.25	0.127	0.365	TRUE	FALSE	FALSE
A*01:01	AIDNPLHY	8	9	0.916981	Protein	B4DTM8;A5YKK6-3;A5YKK6;A5YKK6-2;A5YKK6-4	AID-NPLHY	2949.27	0.206	0.999	TRUE	FALSE	FALSE
A*01:01	AIDPLLFKY	9	2	0.923958	Protein	D3DS96;Q05CW0;Q9NRL2;Q9NRL2-2;Q32ND1	AIDPLLFKY	82.22	0.02	0.074	FALSE	FALSE	FALSE
A*01:01	AIDQLHLEY	9	6	0.772835	Protein	O43707-2;O43707;Q96BG6;O43707-3;A0A0S2Z3G9	AIDQLHLEY	30.77	0.01	0.029	TRUE	FALSE	FALSE
A*01:01	AIMELDDTLKY	11	3	0.776693	Protein	B3KUN1;Q6I9T8;B3KRM2;P67775-2;A0A140VJS0	AIMDDTLKY	3571.52	0.517	1.128	TRUE	FALSE	FALSE
A*01:01	ALDAAVLAY	9	3	0.80864	Protein	Q8IYS1	ALDAAVLAY	44.43	0.033	0.043	TRUE	FALSE	FALSE
A*01:01	ALDGGFQMHY	10	8	0.955957	Protein	H0YN68;Q9BZT5;Q9Y6B2;Q9Y6B2-2	ALDGGQMHY	110.1	0.039	0.092	TRUE	FALSE	FALSE
A*01:01	ALDNTDLVFGQY	12	3	0.690413	Protein	A0A0M4C4P8;A0A024R0K3;F5H5P2;Q59EI3;F5GXU9	ALDNTDLQY	83.72	0.086	0.075	FALSE	FALSE	FALSE
A*01:01	ALDQFQEKY	9	3	0.940832	Protein	A0AVT1;A0AVT1-3;A0A024RDB0;B3KSS1	ALDQFQEKY	100.15	0.023	0.086	TRUE	FALSE	FALSE
A*01:01	ALDSHILDY	9	1	0.624085	Protein	H7C0R6;A0A024R2F4;H7C3J3;Q9BV44	ALDSHILDY	30.95	0.021	0.03	TRUE	FALSE	FALSE
A*01:01	ALDSHILDYY	10	3	0.695191	Protein	H7C0R6;A0A024R2F4;H7C3J3;Q9BV44	ALDSHILYY	31.71	0.034	0.031	TRUE	FALSE	FALSE
A*01:01	ALDTINILLY	10	6	0.739701	Protein	Q4LE49;O14497;H0Y488;O14497-2;H0YEW5	ALDTINLLY	26.13	0.036	0.023	TRUE	FALSE	FALSE
A*01:01	ALDVVNLVY	9	9	0.826582	Protein	O95236-3;O95236-2;O95236;A0A024R1G6	ALDVVNLVY	40.07	0.035	0.039	TRUE	FALSE	FALSE
A*01:01	ASAAAAAAAALLY	13	18	0.783737	Protein	P47974	ASAAAALLY	282.42	0.574	0.189	TRUE	FALSE	FALSE
A*01:01	ASAVIGLLY	9	1	0.736484	Protein	Q9Y5U4;A0A0C4DGZ4;A0A024RAI2	ASAVIGLLY	41.25	0.065	0.04	TRUE	FALSE	FALSE
A*01:01	ASDALDKIRY	10	1	0.657078	Protein	Q58FF7;Q6PK50;Q58FF6;Q58FF8;P08238	ASDALDIRY	52.39	0.034	0.049	TRUE	FALSE	FALSE
A*01:01	ASDKETYELRY	11	20	0.93863	Protein	C9JYQ9;Q6P5R6;H0Y8C2	ASDKETLRY	54.59	0.015	0.051	TRUE	FALSE	FALSE
A*01:01	ASDLSQPDLVY	11	3	0.726547	Protein	J3KN16;Q5VYK3;B3KXF2	ASDQPDLVY	83.49	0.036	0.075	TRUE	FALSE	FALSE
A*01:01	ASDMLQLEY	9	1	0.711611	Protein	Q86V97;B4DS80;Q8WVZ9;Q6FI68;B2RDL4	ASDMLQLEY	4.69	0.002	0.007	TRUE	FALSE	FALSE
A*01:01	ASDPYQVHV	9	1	0.715774	Protein	B4DHJ3;C9J2Y9;P30876;C9J4M6;B4DH29	ASDPYQVHV	1056.04	0.295	0.482	TRUE	FALSE	FALSE
A*01:01	ASDSIVLFY	9	5	0.788591	Protein	B7ZME4;Q9P2K2	ASDSIVLFY	4.21	0.002	0.006	TRUE	FALSE	FALSE
A*01:01	ASDYFDQLY	9	3	0.710974	Protein	P47897;A8K3A8;P47897-2;A0A1B0GVU9;B4DDN1	ASDYFDQLY	4.69	0.003	0.007	TRUE	FALSE	FALSE
A*01:01	ASEAEMRLFY	10	13	0.884312	Protein	Q8IY37	ASEAEMLFY	24.36	0.045	0.02	TRUE	FALSE	FALSE
A*01:01	ASEDATIKVWDY	12	11	0.775634	Protein	P43034	ASEDATIKY	230.39	0.069	0.164	TRUE	FALSE	FALSE
A*01:01	ASEDSVLLY	9	1	0.524471	Protein	B2R7X3;Q13112	ASEDSVLLY	8.81	0.002	0.009	TRUE	FALSE	FALSE
A*01:01	ASEFPGAQHY	10	2	0.875316	Protein	B4DG35;Q9BRR6;Q9BRR6-5;Q9BRR6-2;B4DDP8	ASEPGAQHY	178.47	0.031	0.134	TRUE	FALSE	FALSE
A*01:01	ASEQQALHTVQY	12	3	0.829723	Protein	Q5SRE5;Q5SRE5-2	ASEQQALQY	266.49	0.075	0.181	TRUE	FALSE	FALSE
A*01:01	ASETGFLTY	9	2	0.776211	Protein	B4DP15;A0A1U9X8W1;A0A0G2JJL1;A0A140T9L0;H0Y6G3	ASETGFLTY	27.2	0.01	0.024	TRUE	FALSE	FALSE
A*01:01	ATANAKDLYDIFY	13	2	0.629817	Protein	Q5VUA4	ATDLYDIFY	35.01	0.189	0.034	TRUE	FALSE	FALSE
A*01:01	ATDDASLLIVNRY	13	30	0.903261	Protein	C9J0A5;C9JXC9;Q5VTR2;C9JWJ4;Q05DC0	ATDDASLLY	8.73	0.005	0.009	TRUE	FALSE	FALSE
A*01:01	ATDDATLLIVNRY	13	11	0.846215	Protein	O75150-3;O75150-4;Q6ZN99;H3BP71;H3BQ99	ATDDATLLY	8	0.004	0.009	TRUE	FALSE	FALSE
A*01:01	ATDFDVLSY	9	1	0.759111	Protein	Q9NTJ5	ATDFDVLSY	6.15	0.002	0.008	TRUE	FALSE	FALSE
A*01:01	ATDFKFAMY	9	1	0.829707	Protein	A0A3B3IT44;P30279;Q53ER2	ATDFKFAMY	6.93	0.004	0.008	TRUE	FALSE	FALSE
A*01:01	ATDGKVLLW	9	1	0.768533	Protein	Q96EX3	ATDGKVLLW	917.05	0.186	0.437	TRUE	FALSE	FALSE
A*01:01	ATDIFSYLVEY	11	2	0.780291	Protein	Q6IN85-2;G3V5Z3;H0YIY8;Q6IN85;G3V5A2	ATDSYLVEY	19.68	0.039	0.017	TRUE	FALSE	FALSE
A*01:01	ATDIKITVY	9	4	0.842669	Protein	C9JXC3;Q9Y530;Q05CR9;A0A024RCY9	ATDIKITVY	21.71	0.005	0.018	TRUE	FALSE	FALSE
A*01:01	ATDIQVLALTY	11	3	0.78023	Protein	Q9ULX3;B2RAR2	ATDIQALTY	30.19	0.018	0.029	TRUE	FALSE	FALSE
A*01:01	ATDITGPIILQTY	13	3	0.81746	Protein	B4DQC4;B4DQ63;P14598-2;A6NI72;A8MVU1	ATDITGQTY	70.55	0.037	0.065	TRUE	FALSE	FALSE
A*01:01	ATDLAQHLY	9	1	0.943194	Protein	Q6ZP82;Q6ZP82-2;A0A0A6YYF7	ATDLAQHLY	4.5	0.001	0.007	TRUE	FALSE	FALSE
A*01:01	ATDLDVANFY	10	2	0.776556	Protein	Q9H840	ATDDVANFY	8.16	0.005	0.009	TRUE	FALSE	FALSE
A*01:01	ATDLVVLDRY	10	8	0.876342	Protein	Q9UPY3;Q9UPY3-2	ATDLVVLRY	13.81	0.017	0.013	TRUE	FALSE	FALSE
A*01:01	ATDMWSIGVLTY	12	4	0.879057	Protein	A0A024RA53;Q9UEE5	ATDMGVLTY	12.81	0.035	0.012	TRUE	FALSE	FALSE
A*01:01	ATDSFSGRFEDVY	13	13	0.844655	Protein	Q9HBH9;Q9HBH9-2;B4E0I7;A4CYL7	ATDSFSGRY	21.54	0.069	0.018	TRUE	FALSE	FALSE
A*01:01	ATEDPWKTNY	10	3	0.87261	Protein	P10768;X6RA14;H7BZT7;A0A140VJJ2	ATDPWKTNY	96.22	0.021	0.083	TRUE	FALSE	FALSE
A*01:01	ATEESFFILKY	11	13	0.902276	Protein	P35606-2;H0Y938;P35606	ATEESILKY	124.94	0.028	0.102	TRUE	FALSE	FALSE
A*01:01	ATEIELAKQITSY	13	11	0.781863	Protein	P50990;Q7Z759;Q53HU0;P50990-3;P50990-2	ATEKQITSY	470.54	0.165	0.272	TRUE	FALSE	FALSE
A*01:01	ATELGKLPAGGVLY	14	8	0.850174	Protein	A0A1U9X9A5;A0A1U9X974;P48634;A0A1U9X975;B4DLY2	ATEAGGVLY	195.25	0.127	0.146	TRUE	FALSE	FALSE
A*01:01	ATELLGLGGLLY	12	9	0.858271	Protein	A6NL54;Q14202-3;A8K3Z7;A6NHN7;Q14202	ATELGGLLY	57.04	0.054	0.054	TRUE	FALSE	FALSE
A*01:01	ATEQAPLWAY	10	6	0.748653	Protein	Q9Y6K0;A0A0C4DGS9;A0A024R0C0;B3KN25	ATEQAPLAY	49.71	0.03	0.047	TRUE	FALSE	FALSE
A*01:01	ATEQVSWGHY	10	1	0.853982	Protein	P46092	ATEQVSWHY	66.5	0.037	0.062	TRUE	FALSE	FALSE
A*01:01	ATESILHFAGY	11	1	0.693036	Protein	P42356;B4DYG5;Q4LE69;D3DX33	ATESILHFY	134.9	0.074	0.108	TRUE	FALSE	FALSE
A*01:01	ATESPLDFTKY	11	3	0.890192	Protein	A8K905;Q8WTT2	ATESPLDFY	145.61	0.035	0.114	TRUE	FALSE	FALSE
A*01:01	ATETQPIVY	9	5	0.867209	Protein	J3KS13;Q00610;K7EJJ5;Q00610-2;A0A087WVQ6	ATETQPIVY	45.3	0.012	0.043	TRUE	FALSE	FALSE
A*01:01	ATEVDSRWQEY	11	2	0.652241	Protein	H3BQK9;E9PNZ4;Q9UPN3;Q9UPN3-4;E9PLY5	ATEVDSQEY	117.35	0.036	0.097	FALSE	FALSE	FALSE
A*01:01	ATEVLMWFY	9	1	0.749389	Protein	O75964	ATEVLMWFY	30.49	0.076	0.029	FALSE	FALSE	FALSE
A*01:01	ATGIFIGHY	9	2	0.895678	Protein	K7EQ91;Q13433-2;Q13433	ATGIFIGHY	785.97	0.385	0.39	FALSE	FALSE	FALSE
A*01:01	ATMTIEELLTRY	12	2	0.830703	Protein	Q6IAU5;B4DDC8;B2R665;B3KXL8;Q59GB2	ATEELLTRY	360.83	0.143	0.228	TRUE	FALSE	FALSE
A*01:01	ATQLAADLLKY	11	8	0.838271	Protein	B3KMX6;Q9UBT7;B2RBI4;Q9UBT7-2	ATAADLLKY	475.87	0.173	0.274	TRUE	FALSE	FALSE
A*01:01	AVDPGLLGY	9	2	0.748319	Protein	Q86V38;Q59FW4;P54259	AVDPGLLGY	38.37	0.008	0.037	TRUE	FALSE	FALSE
A*01:01	AVDVNNMLHLY	11	1	0.900127	Protein	Q8TEH3-2;Q8TEH3-3;Q8TEH3-6;A0A0A0MS48;Q8TEH3	AVDVNNHLY	112.42	0.053	0.094	TRUE	FALSE	FALSE
A*01:01	AVESFLRGTTSY	12	7	0.577332	Protein	Q8TEL6;B4E0Q1;Q8TEL6-3;B4DQU2;B4DW48	AVESGTTSY	1776.99	0.237	0.69	TRUE	FALSE	FALSE
A*01:01	DADYPLRVLY	10	2	0.863543	Protein	F8VVL1;O43583;A0A024RBR3	DADPLRVLY	197.31	0.084	0.147	TRUE	FALSE	FALSE
A*01:01	DAELVAQWNY	10	2	0.767554	Protein	B2RB99;B4DEJ8;A2A2L5;B4DXL5;Q9BY42	DAELAQWNY	2276.87	0.627	0.83	FALSE	FALSE	FALSE
A*01:01	DFLASDTVIY	10	2	0.704436	Protein	A8K1W7	DLASDTVIY	2995.84	1.179	1.009	FALSE	FALSE	FALSE
A*01:01	DIDIRKDLY	9	4	0.826349	Protein	B7Z6P1;P62736;B4DUI8;P68133;Q7Z7J6	DIDIRKDLY	276.16	0.089	0.186	FALSE	FALSE	FALSE
A*01:01	DIDIRPGLY	9	18	0.917694	Protein	O94805;O96019-2;O96019;D3DNS0;Q6FI97	DIDIRPGLY	136.83	0.072	0.109	TRUE	FALSE	FALSE
A*01:01	DIDTRSEFY	9	1	0.598446	Protein	B4DWQ5;B4DHK9;Q8IY98;P61160;P61160-2	DIDTRSEFY	76.69	0.04	0.07	TRUE	FALSE	FALSE
A*01:01	DLDEIVARY	9	1	0.608851	Protein	Q7KZ85-2;Q7KZ85	DLDEIVARY	244.37	0.058	0.17	TRUE	FALSE	FALSE
A*01:01	DLDLESPKSLY	11	1	0.903957	Protein	O94916-5;F6X8W2;O94916-3;O94916-4;O94916	DLDSPKSLY	460.45	0.099	0.269	TRUE	FALSE	FALSE
A*01:01	DLDLSPLEY	9	1	0.829627	Protein	A0A090N7X1;Q9UG63-2;Q9UG63;A0A090N7Y2	DLDLSPLEY	43.99	0.012	0.042	TRUE	FALSE	FALSE
A*01:01	DMDKVLLKY	9	1	0.909809	Protein	Q5IRN4;A0A0D9SFD0;Q06413-2;B2R681;D6RCM6	DMDKVLLKY	74.49	0.028	0.068	TRUE	FALSE	FALSE
A*01:01	DSDFFTSYY	9	1	0.566071	Protein	Q96AE7-2;Q96AE7;Q6MZP1;Q9NVK3;Q9NV73	DSDFFTSYY	5.06	0.006	0.007	TRUE	FALSE	FALSE
A*01:01	DSDHLTIYNAY	11	1	0.493745	Protein	Q7Z478;A0A087WYN9	DSDHLTIYY	57.99	0.054	0.055	TRUE	FALSE	FALSE
A*01:01	DSDINNRLVY	10	2	0.564482	Protein	Q8TE02-4;I3L437;I3L1Q3;I3L2A9;I3L2T0	DSDINNLVY	26.75	0.036	0.024	TRUE	FALSE	FALSE
A*01:01	DSDLLDSQVQY	11	8	0.717662	Protein	O95429;O95429-2;B2RA34	DSDDSQVQY	190.04	0.03	0.142	TRUE	FALSE	FALSE
A*01:01	DSDLQLDRISVY	12	3	0.770909	Protein	B7ZAF0;Q6LC01;Q5SU16;B4DY90;B4DMU8	DSDDRISVY	187.12	0.136	0.14	TRUE	FALSE	FALSE
A*01:01	DSDLQLDRISVYY	13	11	0.846012	Protein	B7ZAF0;Q6LC01;Q5SU16;B4DY90;B4DMU8	DSDLQSVYY	65.51	0.134	0.061	TRUE	FALSE	FALSE
A*01:01	DSDTEKELQALY	12	1	0.781704	Protein	B4DZE1;A0A0A0MSA7;O43432-3;A0A0U1RQK7;O43432-4	DSDTEQALY	44.36	0.051	0.043	TRUE	FALSE	FALSE
A*01:01	DSEGYLLFY	9	3	0.720959	Protein	Q9NSJ7;Q9UPT9-2;A6NNY8;Q9UPT9	DSEGYLLFY	14.96	0.03	0.014	TRUE	FALSE	FALSE
A*01:01	DSEQADIARMLY	12	3	0.755548	Protein	Q15326;Q6PJR5;B0QZE2;Q15326-4;Q15326-2	DSDIARMLY	66.43	0.131	0.062	TRUE	FALSE	FALSE
A*01:01	DTDEYVLKY	9	1	0.800194	Protein	A0A1B0GUV2;A0A1B0GTM7;A0A1B0GVB0;A0A1B0GVR3;A0A1B0GTF7	DTDEYVLKY	7.85	0.003	0.009	TRUE	FALSE	FALSE
A*01:01	DTDFMGLFKSSRY	13	2	0.755771	Protein	A0A0J9YWL0;Q9Y4K1	DTDFKSSRY	22.75	0.105	0.019	TRUE	FALSE	FALSE
A*01:01	DTDFYILDKY	10	16	0.942958	Protein	P14868-2;D3DP78;A0A140VJW5;P14868;Q53T60	DTDFYILKY	16.17	0.044	0.015	FALSE	FALSE	FALSE
A*01:01	DTDHYFLRY	9	5	0.917352	Protein	A0A1W2PPS0;A0A1W2PR70;Q969N2-5;Q969N2-4;A0A1W2PP57	DTDHYFLRY	5.28	0.004	0.007	TRUE	FALSE	FALSE
A*01:01	DTDISLIRY	9	16	0.916079	Protein	X6RLT1;Q8IXH7;Q8IXH7-4;H0UI80	DTDISLIRY	11.32	0.004	0.011	TRUE	FALSE	FALSE
A*01:01	DTDIVDEAIYY	11	1	0.720231	Protein	B2R4D5;F8VR50;O15145;C9JZD1;B4DM63	DTDDEAIYY	51.91	0.031	0.049	TRUE	FALSE	FALSE
A*01:01	DTDLFSQPTY	10	3	0.847194	Protein	A1L4Q0;P52429-2;P52429	DTDLFSQTY	22.31	0.027	0.019	TRUE	FALSE	FALSE
A*01:01	DTEFPNFKY	9	67	0.946372	Protein	P27694	DTEFPNFKY	58.82	0.03	0.055	TRUE	FALSE	FALSE
A*01:01	DTEKELQALY	10	1	0.722006	Protein	B4DZE1;A0A0A0MSA7;O43432-3;A0A0U1RQK7;O43432-4	DTEKEQALY	61.36	0.037	0.057	TRUE	FALSE	FALSE
A*01:01	DTEPPPLLVY	10	2	0.700446	Protein	Q6P2Q9;I3L0J9	DTEPPPLLY	60.43	0.009	0.057	TRUE	FALSE	FALSE
A*01:01	DVDHGNFFTY	10	1	0.599695	Protein	Q96T88-2;A0A087WTW0;A0A087WVR3;B4E0F9;Q96T88	DVDHGNFFY	83.05	0.07	0.075	TRUE	FALSE	FALSE
A*01:01	DVDIRKDLY	9	6	0.819901	Protein	P63261;B3KWQ3;Q1KLZ0;Q9UE89;A5GZ75	DVDIRKDLY	156.56	0.057	0.12	TRUE	FALSE	FALSE
A*01:01	EADGAAWVLLY	11	1	0.565877	Protein	Q6IEG3;Q8N8D1	EADGAALLY	60.37	0.041	0.057	TRUE	FALSE	FALSE
A*01:01	EAEWQTRWFY	10	2	0.610762	Protein	Q9H1P3-2;A0A2R8YDU7;A0A2R8YD49;B2RDK3;A0A2R8YEX0	EAEQTRWFY	276.47	0.312	0.186	TRUE	FALSE	FALSE
A*01:01	EIDHAEYYLY	10	4	0.690996	Protein	B4DT94;E5RJ73;A0A024RAJ1;D6RJC7;Q92552-2	EIDHAEYLY	96.31	0.088	0.083	FALSE	FALSE	FALSE
A*01:01	EIDILRTLY	9	6	0.814005	Protein	A0A024R7E4;P29597;E9PM19;K7EJR6;K7EM33	EIDILRTLY	101.3	0.049	0.087	TRUE	FALSE	FALSE
A*01:01	EIDIPHVWLY	10	6	0.759518	Protein	Q4LE58;H7C0V6;B2RU06;Q04637-8;Q04637-3	EIDPHVWLY	72.45	0.04	0.067	TRUE	FALSE	FALSE
A*01:01	EIEEFYVKY	9	1	0.955451	Protein	A0A024R7V7;Q9P2D1;Q9P2D1-2;Q9P2D1-3	EIEEFYVKY	1459.11	0.195	0.598	FALSE	FALSE	FALSE
A*01:01	EIEQRGLTETGLY	13	1	0.463341	Protein	H0YIK5;Q9H0H5;B2RE34;A0A2X0U4T9;Q9BZ74	EIETETGLY	1743.93	0.537	0.681	TRUE	FALSE	FALSE
A*01:01	ELDDTLKY	8	10	0.9574	Protein	B3KUN1;Q6I9T8;B3KRM2;P67775-2;A0A140VJS0	ELDD-TLKY	957.39	0.116	0.451	TRUE	FALSE	FALSE
A*01:01	ELDISDSKIRY	11	2	0.717904	Protein	Q63HL4;B2R6E5;B4DJI8;H0Y4R2;B4DDH3	ELDDSKIRY	717.35	0.093	0.366	TRUE	FALSE	FALSE
A*01:01	ELDPLTGEWHY	11	4	0.925304	Protein	Q96E43;Q9BZF1;Q5HYM3;A0A024RBB8;Q9BZF1-2	ELDPGEWHY	319.32	0.059	0.207	TRUE	FALSE	FALSE
A*01:01	ELDPMAMTQKY	11	13	0.869938	Protein	E9PPJ0;Q7Z3K9;H0YEX5;Q13435	ELDPMTQKY	262.18	0.052	0.179	TRUE	FALSE	FALSE
A*01:01	ELDQRLFENY	10	6	0.85	Protein	B4DZI7;A0A024QZT2;Q96KP1;B3KPN7	ELDQRLFEY	365.36	0.186	0.23	TRUE	FALSE	FALSE
A*01:01	ELEKSVYWDY	10	1	0.553744	Protein	B9A6J3;I3L361;O43147-2;O43147;O43147-5	ELEKSVYDY	1351.31	0.549	0.569	TRUE	FALSE	FALSE
A*01:01	ELERLTSLY	9	3	0.816081	Protein	A0A024RDI9;Q8TBM8-2;Q8TBM8	ELERLTSLY	124.67	0.067	0.101	TRUE	FALSE	FALSE
A*01:01	ENEHLGFLY	9	3	0.690032	Protein	Q9C0G6-4;Q9C0G6	ENEHLGFLY	820.85	0.33	0.402	FALSE	FALSE	FALSE
A*01:01	EQFAGVVLY	9	1	0.655289	Protein	A0A3B3ISJ1;Q9NSD0;P07225;A0A3B3IRK9;A0A0S2Z4L3	EQFAGVVLY	8190.7	0.741	2.432	FALSE	FALSE	FALSE
A*01:01	ESAFRKLDELY	11	1	0.726622	Protein	Q53G74;Q59GY2;B4DMJ6;P36578;B4DMJ2	ESAKLDELY	687.47	0.302	0.355	TRUE	FALSE	FALSE
A*01:01	ESDLDYIQY	9	3	0.634234	Protein	J3KRZ0;J3QS74;Q8WVK7;J3KSP0	ESDLDYIQY	23.04	0.006	0.019	TRUE	FALSE	FALSE
A*01:01	ESEAASYLDQISRY	14	23	0.901443	Protein	V9HWJ8;P61289;K7ESG5;A0A087WTV2;A0A024R203	ESEAASYLY	154.62	0.219	0.119	TRUE	FALSE	FALSE
A*01:01	ESEDYHFYQGLVY	13	1	0.361006	Protein	Q7Z6Z7;A0A024R9W5;Q5H924;Q3B7K0;A0A024R9Y3	ESEDQGLVY	92.9	0.082	0.081	TRUE	FALSE	FALSE
A*01:01	ESSSVVLRY	9	2	0.825346	Protein	Q5JUQ0	ESSSVVLRY	59.52	0.037	0.056	TRUE	FALSE	FALSE
A*01:01	ETALLVDRY	9	6	0.803094	Protein	B4DMA4;B4DFQ5;Q12996;E9PLP8	ETALLVDRY	155.68	0.099	0.119	TRUE	FALSE	FALSE
A*01:01	ETDEKDFYLY	10	3	0.600512	Protein	Q59FS7;A0A087WXU8;F5GYL3;Q7Z4X3;G3V529	ETDEKDFLY	9.34	0.004	0.01	TRUE	FALSE	FALSE
A*01:01	ETDEKDFYLYY	11	5	0.673167	Protein	Q59FS7;A0A087WXU8;F5GYL3;Q7Z4X3;G3V529	ETDEKDLYY	11.94	0.006	0.012	TRUE	FALSE	FALSE
A*01:01	ETDLLDIRSEY	11	18	0.693102	Protein	P50995;Q5T0G8;Q6ICS0;B4DPJ2;P50995-2	ETDDIRSEY	51.33	0.023	0.049	TRUE	FALSE	FALSE
A*01:01	ETDLSIPTSPTSKY	14	22	0.872879	Protein	J3KQY3;Q9NWS1;Q9NWS1-2;A0A0C4DG30;A0A024RBG0	ETDSPTSKY	87.48	0.038	0.078	TRUE	FALSE	FALSE
A*01:01	ETDSFKLAY	9	1	0.746531	Protein	Q9UMZ2-8;Q9UMZ2-5;Q9UMZ2-7;Q9UMZ2-3;Q9UMZ2-9	ETDSFKLAY	5.6	0.002	0.007	TRUE	FALSE	FALSE
A*01:01	ETEEDKFLLLY	11	10	0.822158	Protein	H7C3E9;G3V0G3;Q9NY93-2;Q9NY93;Q53HB9	ETEEDLLLY	25.76	0.019	0.022	TRUE	FALSE	FALSE
A*01:01	ETEEGIYWRY	10	14	0.948688	Protein	Q8NCW0-3;Q8NCW0-2;Q53F67;Q8NCW0-5;Q8NCW0	ETEEGIYRY	101.26	0.039	0.087	TRUE	FALSE	FALSE
A*01:01	ETEFENGNRSWFY	13	4	0.759718	Protein	Q8NDL9-2;Q8NDL9;C9JQG9;Q8NDL9-3	ETEFENGFY	70.55	0.219	0.065	TRUE	FALSE	FALSE
A*01:01	ETELDGLRY	9	18	0.95212	Protein	P46952;C9IY88;P46952-2	ETELDGLRY	19.67	0.007	0.017	FALSE	FALSE	FALSE
A*01:01	ETELGLYKVNEY	12	6	0.738716	Protein	A0A087WTW0;Q96T88-2;A0A087WVR3;Q96T88	ETELGVNEY	332.3	0.137	0.214	TRUE	FALSE	FALSE
A*01:01	ETELISTTANY	11	1	0.744354	Protein	D6RAY9;Q9Y3Z5;Q9UK43;E7EQZ7;B2R5Y4	ETESTTANY	306.19	0.074	0.2	TRUE	FALSE	FALSE
A*01:01	ETEQSFGLYGNKY	13	1	0.884726	Protein	O60673-2;C4TNX0;O60673	ETEQSGNKY	174.19	0.117	0.131	FALSE	FALSE	FALSE
A*01:01	ETEQTKFWDY	10	1	0.617072	Protein	Q495W5;B2RC53	ETEQTKFDY	132.14	0.125	0.106	FALSE	FALSE	FALSE
A*01:01	ETEYAFSLDSKY	12	9	0.849449	Protein	Q5VWN6;A0A2R8YH03	ETESLDSKY	94.06	0.087	0.082	TRUE	FALSE	FALSE
A*01:01	ETFLTSPEELY	11	2	0.762467	Protein	H0YJ63;O95433;G3V438;H0YJG7;O95433-2	ETTSPEELY	1369.59	0.238	0.574	TRUE	FALSE	FALSE
A*01:01	ETTFLVDKY	9	14	0.911331	Protein	P48444;B0YIW6;B0YIW5;P48444-2;Q6MZV5	ETTFLVDKY	307.6	0.162	0.2	TRUE	FALSE	FALSE
A*01:01	EVAEPSVLFDLY	12	1	0.777278	Protein	Q5T280	EVAEPSDLY	1378.96	0.423	0.577	TRUE	FALSE	FALSE
A*01:01	EVDPDTILK	9	16	0.874648	Protein	B4E0L0;Q96DI9;Q9BY77-2;Q9BY77;F6VRR5	EVDPDTILK	4837.51	0.503	1.446	TRUE	FALSE	FALSE
A*01:01	FADFDGVLY	9	1	0.714579	Protein	Q53R19;C9JTV5;G5E9J0;O15144	FADFDGVLY	7.84	0.008	0.009	TRUE	FALSE	FALSE
A*01:01	FADHVVPLLEY	11	1	0.491623	Protein	Q8IWY9-1;H3BM60;Q8IWY9	FADHPLLEY	59.04	0.066	0.056	FALSE	FALSE	FALSE
A*01:01	FADQLIAAGHY	11	5	0.951734	Protein	Q13813;A0A024R889;Q13813-2;A0A0D9SF54;A0A384P5S9	FADQAAGHY	332.4	0.168	0.214	FALSE	FALSE	FALSE
A*01:01	FGDTLHIHY	9	3	0.619565	Protein	Q9NYL4-2;Q9NYL4;F8VU90;Q86SR8	FGDTLHIHY	152.32	0.075	0.118	TRUE	FALSE	FALSE
A*01:01	FIDASRLVY	9	25	0.845826	Protein	G3XAM7;P26232-3;P26232-6;P26232-5;P35221-2	FIDASRLVY	13.21	0.018	0.013	TRUE	FALSE	FALSE
A*01:01	FIDHDITSQLY	11	8	0.763347	Protein	Q96DN5;Q96DN5-3;Q8N1Y0;Q96DN5-2;E7EWW7	FIDHTSQLY	45.27	0.03	0.043	TRUE	FALSE	FALSE
A*01:01	FIDSIIAKY	9	19	0.961049	Protein	P28288;B4DL07;B4DZ22	FIDSIIAKY	35.75	0.02	0.035	TRUE	FALSE	FALSE
A*01:01	FIDSQRVWAEY	11	13	0.748816	Protein	B4DK16;Q6P2Q9	FIDSQRVEY	135.77	0.135	0.108	TRUE	FALSE	FALSE
A*01:01	FIDVDDERWHY	11	23	0.786692	Protein	O14929-2;O14929	FVDDERWHY	222.93	0.062	0.16	TRUE	FALSE	FALSE
A*01:01	FIEESRQLLSY	11	2	0.650511	Protein	Q9NW90;M0R0X3;Q5PRF9;M0QY61;A0A024R0N7	FIEESRQLY	589.12	0.145	0.314	TRUE	FALSE	FALSE
A*01:01	FLDANVKESY	10	1	0.690647	Protein	Q92902-2;Q5TAA8;Q92902;D3DR63;D3DR62	FLDNVKESY	77.29	0.061	0.07	TRUE	FALSE	FALSE
A*01:01	FLDASGAKLDY	11	5	0.68028	Protein	Q7L1Q6-4;Q7L1Q6-2;A0A024R3Z6;C9JFN4;C9IZ80	FLDASGAKY	70.16	0.072	0.065	TRUE	FALSE	FALSE
A*01:01	FLDDFESKY	9	29	0.945211	Protein	Q8TF74-2;J3KSA3;A8MWR2;Q8TF74;A0A024R1X2	FLDDFESKY	19.95	0.008	0.017	TRUE	FALSE	FALSE
A*01:01	FLDDGHTFNY	10	2	0.735412	Protein	E9PKU7;B4DJ30;B4DIW2;F5H6X6;B4DZ53	FLDDGHTFY	10.68	0.008	0.011	TRUE	FALSE	FALSE
A*01:01	FLDKVVGLQK	10	1	0.785249	Protein	A0A096LP10;Q9NP73-2;A0A087WT15	FLDKVGLQK	4553.06	1.817	1.367	TRUE	FALSE	FALSE
A*01:01	FLDLVNYVY	9	1	0.856256	Protein	F2Z2U4;Q9Y4A5-2;Q59FH1;H0Y4W2;Q9Y4A5	FLDLVNYVY	19.35	0.047	0.017	TRUE	FALSE	FALSE
A*01:01	FLDNPDAFYY	10	1	0.655588	Protein	Q59GZ2;P08567	FLDPDAFYY	10.91	0.018	0.011	TRUE	FALSE	FALSE
A*01:01	FLDPAQRDLY	10	1	0.475403	Protein	K7EM99;Q9HCL3;A8KAN8	FLDPAQDLY	12.63	0.01	0.012	TRUE	FALSE	FALSE
A*01:01	FLDPITGTFRY	11	17	0.901997	Protein	A8K8N5;B4DUC6;P40818;A0A024R5S4;P40818-2	FLDPGTFRY	35.04	0.017	0.034	TRUE	FALSE	FALSE
A*01:01	FLDTNETPYF	10	2	0.599074	Protein	Q53T09;P13010	FLDNETPYF	600.59	0.569	0.319	TRUE	FALSE	FALSE
A*01:01	FLEAIENNKY	10	2	0.876701	Protein	Q8WU90;B7Z592	FLEAENNKY	317.88	0.143	0.206	TRUE	FALSE	FALSE
A*01:01	FLEDAIAVTRY	11	1	0.321056	Protein	B4DKW2;Q6P158;H7C109;Q59G60	FLEDAVTRY	880.07	0.149	0.424	TRUE	FALSE	FALSE
A*01:01	FLEIVSEKSRY	11	1	0.54074	Protein	Q9BV23;Q9HBL9;A0A024R323	FLESEKSRY	820.92	0.245	0.402	TRUE	FALSE	FALSE
A*01:01	FLENAYEKY	9	3	0.901897	Protein	Q16850;A0A0C4DFL7;Q05D40;B3KRC6	FLENAYEKY	124.47	0.068	0.101	TRUE	FALSE	FALSE
A*01:01	FLENVIRDAVTY	12	35	0.947143	Protein	P62805;Q0VAS5;Q6B823;B2R4R0	FLENDAVTY	974.83	0.341	0.456	TRUE	FALSE	FALSE
A*01:01	FLEQVHQLY	9	10	0.953264	Protein	E7EPD2;J3KPM9;E7ENM1;P42224-2;E9PH66	FLEQVHQLY	32.94	0.024	0.032	TRUE	FALSE	FALSE
A*01:01	FLNDSYLKY	9	3	0.938428	Protein	Q8WVM7;Q6MZP3;B2R8Y6;Q6AI02;Q8N3U4	FLNDSYLKY	57.33	0.05	0.054	TRUE	FALSE	FALSE
A*01:01	FLSFPTTKTY	10	1	0.734524	Protein	A0A385HVZ2;A0A385HW21;U3PXP0;A0A385HW63;A0A385HW00	FSFPTTKTY	896.66	0.29	0.43	TRUE	FALSE	FALSE
A*01:01	FMDPASALYR	10	3	0.57875	Protein	P28070;A0A140VK46;B4DFL3	FMDPASALY	70.16	0.21	0.065	TRUE	FALSE	FALSE
A*01:01	FMDPEMETRY	10	3	0.850393	Protein	B7ZLX9;A0A0A0MSC1;U3KQ91;B3KNM3;O60266	FMDPEMTRY	28.91	0.024	0.027	TRUE	FALSE	FALSE
A*01:01	FMDPGPEGKLY	11	1	0.459258	Protein	P46020-2;A6NMN0;P46020-3;A6NIT2;P46020	FMDPGPELY	67.39	0.018	0.062	FALSE	FALSE	FALSE
A*01:01	FMEFLKGSGDY	11	5	0.556618	Protein	A0A3F2YNX1	FMEKGSGDY	753.32	0.786	0.379	FALSE	FALSE	FALSE
A*01:01	FMEKETPLRY	10	3	0.897378	Protein	H7C1I8;Q2PZI1;A0A1B0GW05	FMEETPLRY	56.33	0.047	0.053	TRUE	FALSE	FALSE
A*01:01	FSDAQTIEAGQY	12	2	0.750533	Protein	Q15751;A0A024R5W0	FSDAQTIQY	9.19	0.018	0.01	TRUE	FALSE	FALSE
A*01:01	FSDHGLLTTVAY	12	1	0.344877	Protein	P32189-4;B4DFX4;A8K8B7;P32189-2;P32189-1	FSDHGLLTY	7.28	0.021	0.009	TRUE	FALSE	FALSE
A*01:01	FSDITPTPF	9	1	0.673964	Protein	Q96G03;E7ENQ8	FSDITPTPF	99.62	0.226	0.086	FALSE	FALSE	FALSE
A*01:01	FSDIVKQGY	9	3	0.775908	Protein	H3BSK0;H3BVB4;H3BTK2;B2RD67;A0A1B0GX86	FSDIVKQGY	10.12	0.004	0.01	TRUE	FALSE	FALSE
A*01:01	FSDLNLEAHMY	11	3	0.95346	Protein	Q5R372-3;Q5R372-4;Q5R372;F1LJ00;Q5R372-5	FSDLEAHMY	16.63	0.016	0.015	TRUE	FALSE	FALSE
A*01:01	FSDLPLRV	8	2	0.733515	Protein	E9PD99;B4DEQ7;Q96II8-4;B4DU23;Q96II8-3	FSD-LPLRV	2199.77	0.902	0.811	FALSE	FALSE	FALSE
A*01:01	FSDNDKLYLY	10	1	0.84562	Protein	A0A0A0MSM9;P48382;F6X9D6;F6R6G4;F6S3S0	FSDNDKLLY	4.24	0.003	0.006	TRUE	FALSE	FALSE
A*01:01	FSDNIEFY	8	3	0.776815	Protein	P57740-2;P57740-3;P57740	FSDNI-EFY	29.04	0.042	0.027	TRUE	FALSE	FALSE
A*01:01	FSDPFTGGGRY	11	1	0.538171	Protein	H0YBW4;Q9Y263;E5RIM3	FSDPGGGRY	14.05	0.009	0.013	TRUE	FALSE	FALSE
A*01:01	FSDPNFLAH	9	11	0.930651	Protein	P16885;A0A0A0MRF9;B4E3H3	FSDPNFLAH	77.89	0.086	0.071	FALSE	FALSE	FALSE
A*01:01	FSDTATPDIKSHY	13	1	0.793175	Protein	Q99828;A0A140VK09;Q99828-2	FSDTATSHY	21.39	0.033	0.018	FALSE	FALSE	FALSE
A*01:01	FSDVISFILY	10	2	0.881984	Protein	I3L144;Q96Q15;Q96Q15-3;J3KRA9;H3BQN7	FSDVISILY	3.33	0.012	0.005	TRUE	FALSE	FALSE
A*01:01	FSDYLHPQY	9	7	0.937427	Protein	Q9ULG6;H3BN32;Q9ULG6-2;Q9ULG6-4;A0A024R5S7	FSDYLHPQY	5.85	0.005	0.008	TRUE	FALSE	FALSE
A*01:01	FSDYPPLGR	9	1	0.600185	Protein	Q504Z0;Q5VTE0;B4E2C5;Q6P4C9;Q6IPN6	FSDYPPLGR	1372.51	0.502	0.575	TRUE	FALSE	FALSE
A*01:01	FSDYPPLGRF	10	17	0.720156	Protein	Q6IPS9;Q96CD8;Q53HM9;B4DNE0;Q14222	FSDYPPLRF	221.61	0.213	0.16	TRUE	FALSE	FALSE
A*01:01	FSEEDFRLY	9	3	0.660745	Protein	Q6PK18-2;J3QRG1;A0A024R8X4;K7ENS7;Q6PK18	FSEEDFRLY	22.04	0.011	0.019	TRUE	FALSE	FALSE
A*01:01	FSEEHYIFY	9	2	0.720757	Protein	B4DTX4;P20936-2;E9PGC0;P20936;P20936-4	FSEEHYIFY	4.56	0.003	0.007	TRUE	FALSE	FALSE
A*01:01	FSEEQLNRY	9	2	0.827664	Protein	Q15544-2;Q15544;A0A3B3ITY8	FSEEQLNRY	15.25	0.007	0.014	TRUE	FALSE	FALSE
A*01:01	FSEFTGVWKY	10	10	0.962959	Protein	Q53FC3;O75340;A0A024QZ42;O75340-2	FSETGVWKY	16.29	0.032	0.015	TRUE	FALSE	FALSE
A*01:01	FSEIDLEKY	9	29	0.967723	Protein	B3KV46;Q86XF0	FSEIDLEKY	31.81	0.014	0.031	FALSE	FALSE	FALSE
A*01:01	FSELDENLEY	10	1	0.775062	Protein	H0Y6M8;B2REB0;Q9NZJ4	FSEDENLEY	9.67	0.007	0.01	FALSE	FALSE	FALSE
A*01:01	FSENLQPHISSY	12	4	0.814216	Protein	Q8TEX9;Q59FI4;D3DS63;B3KQ33;B3KT38	FSEPHISSY	69.56	0.064	0.064	TRUE	FALSE	FALSE
A*01:01	FSENTLQFY	9	1	0.74772	Protein	O75448;B4DSQ6;F5GY88;B4E0S3;B4E1A5	FSENTLQFY	6.87	0.005	0.008	TRUE	FALSE	FALSE
A*01:01	FSEPDFVAKFY	11	16	0.95266	Protein	Q9NWQ9	FSEPDFVFY	38.63	0.037	0.037	TRUE	FALSE	FALSE
A*01:01	FSEPFHLIVSY	11	11	0.818595	Protein	Q5VXA5;Q7L513-2;Q7L513-10;Q7L513-8;Q7L513-9	FSEPFHLSY	38.25	0.055	0.037	TRUE	FALSE	FALSE
A*01:01	FSEPRAIFY	9	13	0.770269	Protein	Q16512;Q15523;K7EL10;Q16512-2	FSEPRAIFY	6.57	0.003	0.008	TRUE	FALSE	FALSE
A*01:01	FSEPRAVFY	9	1	0.565114	Protein	Q16513-2;Q16513-5;Q16513-4;Q16513-3;Q16513	FSEPRAVFY	7.54	0.004	0.009	TRUE	FALSE	FALSE
A*01:01	FSEPSFITESY	11	8	0.866534	Protein	P14921-2;B4DW78;Q5U0M2;P14921-5;Q6FG54	FSEPSTESY	58.77	0.015	0.055	TRUE	FALSE	FALSE
A*01:01	FSQPENQNLLY	11	5	0.700549	Protein	Q9BXW9-1;A0A024R2G2;Q9BXW9;Q9BXW9-3;H7BZJ7	FSENQNLLY	13.04	0.012	0.013	TRUE	FALSE	FALSE
A*01:01	FSQSLQELLAEHY	13	4	0.851817	Protein	Q6IBC8;P62324	FSQSLQELY	185.36	0.386	0.139	TRUE	FALSE	FALSE
A*01:01	FTADEARDLIQRY	13	11	0.829896	Protein	Q6P2Q9	FTADEAQRY	299.03	0.147	0.197	TRUE	FALSE	FALSE
A*01:01	FTADGDQVFAGRYY	14	3	0.600075	Protein	Q96SB8;C9JMN1;Q96SB8-2;A0A2S1ZR79;A0A2S1ZR87	FTADGDQYY	236.08	0.202	0.167	TRUE	FALSE	FALSE
A*01:01	FTAEFSSRY	9	5	0.597211	Protein	B4DEJ6;Q9UNN5;B3KT28;A8K9X5	FTAEFSSRY	11.66	0.016	0.011	TRUE	FALSE	FALSE
A*01:01	FTAFANSHY	9	3	0.773262	Protein	Q92673;B4DYT0;B4DHG9;A0A024R3H2;B4DJ13	FTAFANSHY	25.55	0.054	0.022	FALSE	FALSE	FALSE
A*01:01	FTATRPGVY	9	8	0.964363	Protein	D2IKF4;L7YNE0;A0A343GRX2;C8XWJ6;A0A343UGE8	FTATRPGVY	67.55	0.101	0.063	FALSE	FALSE	FALSE
A*01:01	FTATRPGVYY	10	7	0.913641	Protein	D2IKF4;L7YNE0;A0A343GRX2;C8XWJ6;A0A343UGE8	FTATPGVYY	44.94	0.073	0.043	FALSE	FALSE	FALSE
A*01:01	FTDADDVAILTY	12	3	0.88934	Protein	Q9NYB0	FTDADILTY	6.51	0.012	0.008	TRUE	FALSE	FALSE
A*01:01	FTDEEGYGRY	10	1	0.467882	Protein	Q12874;Q53HM6;A8K566;B4DW90;A8K7V1	FTDEEGYRY	5.68	0.003	0.008	TRUE	FALSE	FALSE
A*01:01	FTDEEGYGRYL	11	5	0.766943	Protein	Q12874;Q53HM6;A8K566;B4DW90;A8K7V1	FTDEEGYRY	189.98	0.123	0.142	TRUE	FALSE	FALSE
A*01:01	FTDESYLELY	10	8	0.705201	Protein	Q01780;B4DFE4;B4DKG8;Q01780-2	FTDESYLLY	2.5	0.001	0.004	TRUE	FALSE	FALSE
A*01:01	FTDSLITRNFSNY	13	2	0.40518	Protein	H0YLH3;Q6FHF7;B4E069;Q92696	FTDSLITRY	11.71	0.053	0.012	TRUE	FALSE	FALSE
A*01:01	FTDTSIILF	9	4	0.796525	Protein	P04899-4;P04899-2;P63096;P04899-3;A0A3B3ITM0	FTDTSIILF	18.19	0.038	0.016	TRUE	FALSE	FALSE
A*01:01	FTDVIGHY	8	1	0.590165	Protein	Q969V5;B7Z8S4;B4DE24;A0A024RAA0	FTDVIGH-Y	32.99	0.034	0.032	TRUE	FALSE	FALSE
A*01:01	FTDVNSILRY	10	29	0.963915	Protein	Q3KQZ8;V9GZ76;B4DKX5;H6WCP5;P07814	FTDNSILRY	2.87	0.001	0.005	TRUE	FALSE	FALSE
A*01:01	FTDVPSIQIY	10	1	0.863415	Protein	A0A0U1RQI6;A0A024R2J1;B4DG03;J3KR49;A0A024R2S6	FTDPSIQIY	6.03	0.002	0.008	TRUE	FALSE	FALSE
A*01:01	FTEAGLKELSEY	12	12	0.960761	Protein	Q7L1Q6-4;B3KU41;Q7L1Q6-2;A0A024R3Z6;C9IZ80	FTEAGLSEY	34.31	0.056	0.033	TRUE	FALSE	FALSE
A*01:01	FTEDQGVDDRLLY	13	3	0.890228	Protein	P23497;B4E2B9;E9PHV6;Q53TD0;P23497-2	FTEDQGLLY	10.36	0.008	0.01	TRUE	FALSE	FALSE
A*01:01	FTEDSLLRH	9	1	0.83113	Protein	P26358;P26358-2;Q59FP7;I6L9H2;A0A024R7E3	FTEDSLLRH	463.29	0.202	0.27	FALSE	FALSE	FALSE
A*01:01	FTEEDVKFY	9	4	0.850609	Protein	Q9UK32;A0A2R8Y7S9;B7Z3B5;E9PMM7;A0A384MDW3	FTEEDVKFY	31.44	0.012	0.03	TRUE	FALSE	FALSE
A*01:01	FTEHEIQEWY	10	1	0.57052	Protein	E5RHE8;E5RIA5;E5RHC8;E5RIG4;Q59GU4	FTEHEIQEY	20.66	0.021	0.018	TRUE	FALSE	FALSE
A*01:01	FTEIGIHLNAY	11	4	0.608794	Protein	P20592;Q75MY8	FTEIGIHLY	52.65	0.043	0.05	TRUE	FALSE	FALSE
A*01:01	FTELAILY	8	4	0.860423	Protein	Q00610;J3KS13;P53675;Q00610-2;A0A087WXH4	FTE-LAILY	65.36	0.101	0.061	TRUE	FALSE	FALSE
A*01:01	FTENDKEYQEY	11	1	0.6399	Protein	A0A3B3IU46;Q9BTL3	FTDKEYQEY	27.72	0.012	0.025	TRUE	FALSE	FALSE
A*01:01	FTEPNEISQY	10	1	0.519647	Protein	O75663	FTEPNEIQY	20.76	0.006	0.018	TRUE	FALSE	FALSE
A*01:01	FTETEALEGRIY	12	6	0.601002	Protein	Q5T3E1;Q70CQ1;Q70CQ1-2	FTETEALEY	14.02	0.034	0.013	TRUE	FALSE	FALSE
A*01:01	FTQVQTIQY	9	1	0.746403	Protein	Q05397-5;Q59GM6;A0A059VC25;Q658W2;E7ESA6	FTQVQTIQY	25.45	0.02	0.021	FALSE	FALSE	FALSE
A*01:01	FTSPVTPEELLY	12	4	0.850208	Protein	Q8IUR7-7;Q9NZY0;Q8IUR7-6;G5E9V7;B7Z637	FTSPEELLY	16.45	0.052	0.015	TRUE	FALSE	FALSE
A*01:01	FTYDPWIGKLLY	12	1	0.956621	Protein	P21673;A0A384NQ10;E9PD37;A2VED4	FTYDGKLLY	89.43	0.127	0.079	TRUE	FALSE	FALSE
A*01:01	FVAEPDNKNVY	11	2	0.811243	Protein	B4DJL0;P04844-2;P04844;B2RE46	FVAEPDNKY	6299.56	0.514	1.844	TRUE	FALSE	FALSE
A*01:01	FVDDYTVRV	9	1	0.758177	Protein	C9JW37;Q4ZG77;A0A140VKF2;O00487	FVDDYTVRV	424.95	0.313	0.255	TRUE	FALSE	FALSE
A*01:01	FVDKPVAY	8	2	0.763571	Protein	Q53T94-2;Q53T94-3;Q53T94	FVD-KPVAY	864.6	0.134	0.418	TRUE	FALSE	FALSE
A*01:01	FVDPLVTNY	9	8	0.874908	Protein	B4E3K2;B4DK89;Q3T7C6;Q3T7C5;S4R2X1	FVDPLVTNY	30.23	0.007	0.029	TRUE	FALSE	FALSE
A*01:01	FVDPYPVNKY	10	8	0.910837	Protein	V9HWF1;Q96M94	FVDPYPNKY	33.71	0.011	0.033	TRUE	FALSE	FALSE
A*01:01	FVELPDNHSSLIY	13	3	0.622949	Protein	O43617;A0A087WYS5;A0A087WWM0;O43617-2	FVEHSSLIY	201.91	0.301	0.15	TRUE	FALSE	FALSE
A*01:01	FVESSTSVLRY	11	13	0.884212	Protein	Q96QE3;A0A075B754;Q96QE3-2;H0UIC2	FVESSTLRY	96.57	0.061	0.084	TRUE	FALSE	FALSE
A*01:01	FVETESVRY	9	10	0.805466	Protein	P48444;B0YIW6;B0YIW5;Q6MZV5;Q6P1Q5	FVETESVRY	59.25	0.03	0.056	TRUE	FALSE	FALSE
A*01:01	FVLFDSESIGIY	12	1	0.427638	Protein	B4DJC3;O75367;Q59FH0;O75367-2;O75367-3	FVSESIGIY	3254.01	1.736	1.062	TRUE	FALSE	FALSE
A*01:01	GISDADFVLY	10	2	0.640435	Protein	Q96KR4-3;Q96KR4-2;Q96KR4;C9JF40;F8WCE5	GSDADFVLY	32.93	0.056	0.032	FALSE	FALSE	FALSE
A*01:01	GLDDKLLHY	9	5	0.895503	Protein	Q86XK3;Q86XK3-3;Q86XK3-2	GLDDKLLHY	113.83	0.027	0.094	TRUE	FALSE	FALSE
A*01:01	GLDEPLLK	8	12	0.838936	Protein	P01906;Q67AC5;Q67AE7;B7ZW51;A0A346MPT6	GLDE-PLLK	22121.9	4.636	11.398	TRUE	FALSE	FALSE
A*01:01	GLDQPLLK	8	7	0.803468	Protein	A0A172WC76;Q67AI6;A0A1L5LC20;Q67AH5;A0A140T9F8	GLD-QPLLK	22995.1	5.688	12.508	FALSE	FALSE	FALSE
A*01:01	GSDFYSMHY	9	2	0.848007	Protein	Q86W34-5;J3KTM1;A0A024R8K0;J3KRD0;Q86W34	GSDFYSMHY	6.15	0.007	0.008	TRUE	FALSE	FALSE
A*01:01	GSDVEHNPVFFSY	13	3	0.56539	Protein	Q9NQW7-3;Q5T6H7;B3KSI7;Q9NQW7-2;Q9NQW7	GSDPVFFSY	135.58	0.185	0.108	TRUE	FALSE	FALSE
A*01:01	GSHLVEALY	9	2	0.664685	Non-coding	NR_003512-1;NR_003512-2	GSHLVEALY	1173.42	0.42	0.518	TRUE	FALSE	FALSE
A*01:01	GSSFIQHYY	9	1	0.6795	Protein	P61970;A0A024R6Y2;H3BRV9;B4DEQ2	GSSFIQHYY	80.12	0.078	0.072	FALSE	FALSE	FALSE
A*01:01	GSVEILLSY	9	11	0.748891	Protein	A8K5N5;B0AZN7;H0YLT9;B0AZM8;P22735	GSVEILLSY	781.6	0.249	0.388	FALSE	FALSE	FALSE
A*01:01	GTDELRLLY	9	1	0.74839	Protein	B7Z381;Q9Y4W2;Q9Y4W2-2;Q9Y4W2-4	GTDELRLLY	4.04	0.002	0.006	TRUE	FALSE	FALSE
A*01:01	GTDLSIFKY	9	4	0.723235	Protein	D6W5Q7;Q96JG6;Q96JG6-3;B4DS55;Q5JPD9	GTDLSIFKY	11.94	0.004	0.012	TRUE	FALSE	FALSE
A*01:01	GTDVNAGQIPQLLY	14	1	0.767875	Protein	O75592-2;O75592	GTDVPQLLY	31.17	0.083	0.03	FALSE	FALSE	FALSE
A*01:01	GTEASTKNIFGRY	13	2	0.626607	Protein	J3KRK4;Q96JB5;J3QL95;Q96JB5-4;J3KRI2	GTEASTGRY	447.94	0.365	0.264	TRUE	FALSE	FALSE
A*01:01	GTEFLNPLISKY	12	10	0.892532	Protein	Q9H869-3;Q9H869-5;B4DQQ0;Q9H869-9;I6L9C2	GTEPLISKY	272.53	0.174	0.184	TRUE	FALSE	FALSE
A*01:01	GTEFPNPLISKY	12	32	0.879437	Protein	Q3T8J9-3;A4PBF6;Q1ED43;A4PB68;B2RCN4	GTEPLISKY	338.39	0.13	0.217	TRUE	FALSE	FALSE
A*01:01	GTEFTTILY	9	1	0.78491	Protein	O15350-4;O15350-8;A0A024R4C3;O15350;A0A0C4DFW9	GTEFTTILY	10.56	0.013	0.01	TRUE	FALSE	FALSE
A*01:01	GTELLSLVY	9	3	0.703958	Protein	P78527;P78527-2	GTELLSLVY	22.86	0.037	0.019	TRUE	FALSE	FALSE
A*01:01	GTVYEDLRY	9	1	0.748132	Protein	O00762-2;O00762;B2R4U3;Q5TZN3	GTVYEDLRY	337.74	0.196	0.216	TRUE	FALSE	FALSE
A*01:01	GVDVAEFSSRY	11	2	0.561751	Protein	F1T0L5;Q8N8A6	GVDEFSSRY	718.35	0.144	0.366	FALSE	FALSE	FALSE
A*01:01	GVDVTGPHLY	10	3	0.61624	Protein	Q6IBT1;Q99436;Q5TBG5;Q86U62;E9KL30	GVDTGPHLY	96.67	0.035	0.084	TRUE	FALSE	FALSE
A*01:01	HIDFAIQY	8	9	0.916735	Protein	Q9UHW5-3;Q9UHW5-2;H0YHZ5;Q9UHW5	HID-FAIQY	2296.72	0.322	0.835	TRUE	FALSE	FALSE
A*01:01	HIDFGGTSVWY	11	13	0.865642	Protein	Q8NHM5-2;F6SRV7;Q8NHM5-4;H0Y3N9;Q1RLM6	HIDFGGTSY	544.89	0.134	0.296	TRUE	FALSE	FALSE
A*01:01	HIDLGIKY	8	18	0.936664	Protein	Q5VVD0;Q08ES8;Q5VVC8;P62913-2;P62913	HID-LGIKY	3473.32	0.289	1.104	TRUE	FALSE	FALSE
A*01:01	HIEFEYNKSKY	11	1	0.844734	Protein	Q4G0F5;A0A024R3L9;S4R3Q6;A8K3C1;O75436	HIEFEKSKY	6140.74	0.702	1.796	FALSE	FALSE	FALSE
A*01:01	HLDAELDAY	9	2	0.780903	Protein	Q9Y3Y2-4;Q9Y3Y2;Q9Y3Y2-3;X6R700	HLDAELDAY	94.79	0.06	0.083	TRUE	FALSE	FALSE
A*01:01	HLDDQMTLLQY	11	19	0.820267	Protein	P04150-11;P04150-9;P04150-12;P04150-10;P04150-14	HLDDQLLQY	85.55	0.017	0.076	TRUE	FALSE	FALSE
A*01:01	HLDFNLDKTLY	11	3	0.849313	Protein	P13807;A8K6K7;P13807-2;B7Z806;Q53ER0	HLDFDKTLY	119.79	0.085	0.098	FALSE	FALSE	FALSE
A*01:01	HLDIAQQNLY	10	1	0.836562	Protein	A8K5H1;O75437-2;O75437;Q7Z2R1	HLDAQQNLY	41.05	0.032	0.039	TRUE	FALSE	FALSE
A*01:01	HLDLGILYY	9	42	0.896606	Protein	A0A024R3H8;B3KY32;Q9H3H5-2;Q9H3H5-3;Q9H3H5	HLDLGILYY	22.52	0.01	0.019	TRUE	FALSE	FALSE
A*01:01	HLDTLINEQASY	12	5	0.769336	Protein	B4DG73;A0A140VJG7;Q9Y2V7-2;Q9Y2V7;A0A024RDW5	HLDNEQASY	340.84	0.132	0.218	TRUE	FALSE	FALSE
A*01:01	HLDTLTEHY	9	3	0.839052	Protein	A0A024R7I4;Q9Y421;K7EIY1;B2R547;Q9Y421-3	HLDTLTEHY	53.45	0.012	0.05	TRUE	FALSE	FALSE
A*01:01	HSALLALRY	9	1	0.309104	Protein	Q9NVT9;E5RHK3;E9PR92;E5RJ86	HSALLALRY	42.36	0.068	0.041	TRUE	FALSE	FALSE
A*01:01	HSDELTSLLGY	11	23	0.820681	Protein	A0A1W2PQ90;E7EN38;Q92878-2;A8K3I2;Q92878-3	HSDELTSLY	15.97	0.006	0.015	TRUE	FALSE	FALSE
A*01:01	HSDLHILDF	9	2	0.714989	Protein	Q9BQ90;E7ERR0;Q8N7S8;Q8IVW5;F8W6A4	HSDLHILDF	158.14	0.159	0.121	TRUE	FALSE	FALSE
A*01:01	HSDLLGTLHNLY	12	5	0.772751	Protein	Q69YN4;H0YBN5;Q69YN4-3;Q69YN4-2;Q69YN4-4	HSDTLHNLY	17.03	0.035	0.015	TRUE	FALSE	FALSE
A*01:01	HSDPSILGY	9	44	0.846061	Protein	A2VDH9;O75420;A4D2E1	HSDPSILGY	7.08	0.001	0.008	TRUE	FALSE	FALSE
A*01:01	HSDQQVFEY	9	1	0.659353	Protein	Q969X6-2;Q969X6;H3BSH7;Q969X6-3;A0A0J9YWK2	HSDQQVFEY	7.64	0.001	0.009	TRUE	FALSE	FALSE
A*01:01	HSDTIQWLY	9	16	0.815379	Protein	A0A068F7M9;Q9Y613;B4E2D9	HSDTIQWLY	4.18	0.002	0.006	TRUE	FALSE	FALSE
A*01:01	HSDVFSEPRAIFY	13	1	0.498481	Protein	Q16512-2;Q16512;K7EL10;Q15523	HSDPRAIFY	18.49	0.07	0.016	TRUE	FALSE	FALSE
A*01:01	HSELLEDYY	9	4	0.808901	Protein	B4DZ22;B4DL07;P28288	HSELLEDYY	23.6	0.031	0.019	TRUE	FALSE	FALSE
A*01:01	HSEMYSLLIDTY	12	7	0.722643	Protein	Q7LG56-2;Q7LG56-6;A0A286YFD6;Q7LG56;C9JXC1	HSEMYSLLY	15.79	0.137	0.015	TRUE	FALSE	FALSE
A*01:01	HSEYHTLLY	9	5	0.743193	Protein	B4DGT4;Q9UQL6;Q96K29;Q9UQL6-3;Q5W9G6	HSEYHTLLY	3.88	0.002	0.006	TRUE	FALSE	FALSE
A*01:01	HTDDPLTWDY	10	50	0.774961	Protein	B3KQ21;B4DSL9;B3KX32;B7Z9G4;Q9NYH9	HTDDPTWDY	9.44	0.005	0.01	TRUE	FALSE	FALSE
A*01:01	HTDQLVLIF	9	1	0.700216	Protein	Q9UMX0-4;Q9UMX0-2;B3KNI2;B3KNI8;A0A024R258	HTDQLVLIF	99.04	0.102	0.085	TRUE	FALSE	FALSE
A*01:01	HTDVGLLEY	9	15	0.769942	Protein	Q9Y618-5;C9J330;C9JQE8;C9JE98;C9J0Q5	HTDVGLLEY	3.92	0.001	0.006	TRUE	FALSE	FALSE
A*01:01	HTDWLLDLY	9	2	0.817922	Protein	Q9BQI6;I6L9F1;B4DR33	HTDWLLDLY	3.6	0.005	0.006	TRUE	FALSE	FALSE
A*01:01	HVDEQVFLY	9	1	0.741123	Protein	O96006;A0A024RBU4	HVDEQVFLY	10.51	0.003	0.01	TRUE	FALSE	FALSE
A*01:01	HVDFGGTSVWY	11	2	0.752042	Protein	I3VM53;Q9Y2K7-3;Q9Y2K7;I3VM54	HVDFGGTSY	354.49	0.084	0.225	FALSE	FALSE	FALSE
A*01:01	HVDFPVILY	9	2	0.781845	Protein	O75896	HVDFPVILY	39.49	0.013	0.038	FALSE	FALSE	FALSE
A*01:01	HVEEISELFY	10	5	0.941741	Protein	Q9Y265;H7C4G5;B5BUB1;A0A384MTR5	HVEESELFY	79.48	0.055	0.072	TRUE	FALSE	FALSE
A*01:01	HVEFESQTYY	10	1	0.836532	Protein	Q6ZT12-4;Q6ZT12	HVEESQTYY	221.75	0.068	0.16	FALSE	FALSE	FALSE
A*01:01	IADMGHLKY	9	16	0.956516	Protein	P12004;Q6FHF5;Q6FI35	IADMGHLKY	14.76	0.007	0.014	TRUE	FALSE	FALSE
A*01:01	IADVYYIVGG	10	1	0.406826	Protein	R4GNC0;B4DVL2;Q02083;Q02083-2;H0Y988	IADVYYIVG	28572.8	82.5	22.955	FALSE	FALSE	FALSE
A*01:01	IFWSSLMYLSY	11	1	0.500269	Protein	A0A024RDK5;Q9H5J4	ISSLMYLSY	2390.48	2.987	0.858	FALSE	FALSE	FALSE
A*01:01	IIDGLTGEKAIY	12	1	0.467085	Protein	A3KMH1-3;A3KMH1	IIDGLTGEY	374.97	0.36	0.234	FALSE	FALSE	FALSE
A*01:01	IIDLAGDTVRY	11	1	0.374366	Protein	O75808-2;A0A1B0GVE3;O75808	IIDGDTVRY	551.83	0.097	0.298	TRUE	FALSE	FALSE
A*01:01	IIDPPTEPPPL	11	1	0.268613	Non-coding	NR_033942-1;NR_033942-3;NR_033942-4;NR_033942-5;NR_033942-2	IIDPPPPPL	24759.6	4.968	15.088	FALSE	FALSE	FALSE
A*01:01	IIDYLTDHY	9	4	0.956466	Protein	O95620-2;B4DFH2;A0A024R6Z3;O95620;A4D0R5	IIDYLTDHY	30.25	0.033	0.029	TRUE	FALSE	FALSE
A*01:01	IIEAQYLRY	9	3	0.922204	Protein	B4DES7;B4DH82;Q14690;A0A3B3IUD7	IIEAQYLRY	151.26	0.087	0.117	TRUE	FALSE	FALSE
A*01:01	IIQARATALY	10	1	0.577918	Non-coding	NR_045115-1	IIQAATALY	1588.97	1.006	0.637	FALSE	FALSE	FALSE
A*01:01	ILDEFLQTY	9	1	0.840958	Protein	J3QL36;A0A087X0R7;Q9H4L4	ILDEFLQTY	43.55	0.016	0.042	TRUE	FALSE	FALSE
A*01:01	ILDEVIMGY	9	2	0.73383	Protein	P52732;B2RAM6	ILDEVIMGY	31.27	0.028	0.03	TRUE	FALSE	FALSE
A*01:01	ILDIPNQLY	9	2	0.819356	Protein	Q5JR04;Q9HCE1;B7Z700;B3KQ43;Q9HCE1-2	ILDIPNQLY	33.64	0.008	0.033	TRUE	FALSE	FALSE
A*01:01	ILDIPNQLYY	10	4	0.815547	Protein	B3KQ43;Q5JR04;B7Z700;Q9HCE1-2;Q9HCE1	ILDPNQLYY	20.43	0.013	0.018	TRUE	FALSE	FALSE
A*01:01	ILDNADVLSQY	11	4	0.725583	Protein	B4E2S2;Q9UKK3;A0PJ82	ILDDVLSQY	143.8	0.057	0.113	TRUE	FALSE	FALSE
A*01:01	ILDQGGLKIY	10	1	0.749674	Protein	P09327-2;P09327;Q53F91	ILDQGGLKY	92.2	0.036	0.081	FALSE	FALSE	FALSE
A*01:01	ILDTYLGKY	9	1	0.861166	Protein	P50990;Q7Z759;Q53HU0;P50990-3;H7C2U0	ILDTYLGKY	50.54	0.056	0.048	TRUE	FALSE	FALSE
A*01:01	ILDVLKQGY	9	4	0.75675	Protein	B3KUB9;B4E245;Q9UH65;E9PJM7;E7EMB1	ILDVLKQGY	254.33	0.075	0.175	TRUE	FALSE	FALSE
A*01:01	ILEDDKGAFQLY	12	6	0.804349	Protein	Q9UKT4-2;Q9UKT4;B2RB17	ILEDDFQLY	642.5	0.168	0.337	TRUE	FALSE	FALSE
A*01:01	IMDSTEAQLRY	11	1	0.580707	Protein	E7EMW7;O95071;O95071-2	IMDEAQLRY	103.14	0.059	0.088	FALSE	FALSE	FALSE
A*01:01	ISALPEDKGVDLY	13	23	0.692027	Protein	B2RCM6;Q96S44	ISDKGVDLY	73.78	0.089	0.068	TRUE	FALSE	FALSE
A*01:01	ISDAAQLPHDY	11	2	0.557359	Protein	Q13542;A0A024QZM3;B2R9B9;Q6FG68	ISDAAQHDY	39.95	0.071	0.038	TRUE	FALSE	FALSE
A*01:01	ISDLIRDSY	9	8	0.841002	Protein	O95759-2;J3KQ40;O95759	ISDLIRDSY	17.07	0.01	0.015	TRUE	FALSE	FALSE
A*01:01	ISDLNELLK	9	18	0.936461	Protein	Q15693;B4DLN1;P52815	ISDLNELLK	645.11	0.494	0.338	FALSE	FALSE	FALSE
A*01:01	ISDSYFPRY	9	6	0.935198	Protein	A0A024R972;P11047	ISDSYFPRY	8.86	0.007	0.009	TRUE	FALSE	FALSE
A*01:01	ISEELVQKY	9	1	0.775905	Protein	A0A0U1RQR6;H7C106;Q6IPN0;Q3LIF4;Q9NQC3	ISEELVQKY	74.25	0.011	0.068	TRUE	FALSE	FALSE
A*01:01	ISELLTSDDMKNAY	14	1	0.913604	Protein	Q9NYY8;Q9NYY8-2;B3KMB8;A0A024R419	ISDDMKNAY	448.33	0.307	0.264	FALSE	FALSE	FALSE
A*01:01	ISEPWTQRSFY	11	2	0.352719	Protein	Q6AI61;Q9UKA4	ISEPWTQFY	74.83	0.057	0.068	TRUE	FALSE	FALSE
A*01:01	ISEQTGKELLY	11	10	0.906261	Protein	A0A024R1Y2;P53396-3;A0A024R1T9;P53396;P53396-2	ISEQTGLLY	60.46	0.036	0.057	TRUE	FALSE	FALSE
A*01:01	ISESIKELQFY	11	4	0.89824	Protein	H0YGR4;H0YG54;Q9Y3B8-2;Q9Y3B8-3;Q9Y3B8	ISESELQFY	177.23	0.072	0.133	FALSE	FALSE	FALSE
A*01:01	ISETPIIGNKY	11	2	0.506465	Protein	Q6ZR29;A0A286YEZ9;B3KXG5;A0A2C9F2R7;H0Y9X0	ISETPGNKY	778.09	0.078	0.387	TRUE	FALSE	FALSE
A*01:01	ISEVGTIRY	9	2	0.867863	Protein	Q13873;A8K8R5;Q13873-2;A0A1W2PPB5	ISEVGTIRY	22.38	0.009	0.019	TRUE	FALSE	FALSE
A*01:01	ISEYAADIFY	10	2	0.688219	Protein	B7ZKR8;Q86UV5-3;Q86UV5-5;B7ZKS3;E9PJH5	ISEAADIFY	18.36	0.09	0.016	TRUE	FALSE	FALSE
A*01:01	ISEYAADIFYSRY	13	2	0.823416	Protein	B7ZKR8;Q86UV5-3;Q86UV5-5;B7ZKS3;E9PJH5	ISEYAADRY	114.91	0.37	0.095	TRUE	FALSE	FALSE
A*01:01	ISYGPDWKDFY	11	21	0.913579	Protein	P06865;H3BS10;V9H0E1;B4DVA7;G3XL79	ISYGPDDFY	1389.4	0.402	0.58	TRUE	FALSE	FALSE
A*01:01	ITDDQFDFHTY	11	1	0.861262	Protein	Q8N352;A4FU51;B4E2T6;Q9BXJ9;Q58F05	ITDDQFHTY	13.74	0.005	0.013	FALSE	FALSE	FALSE
A*01:01	ITDFINILHRY	11	5	0.687736	Protein	H0YIC9;Q9UGJ0;Q9UGJ0-2;A0A384MDZ2;F8VYY9	ITDNILHRY	18.73	0.025	0.017	TRUE	FALSE	FALSE
A*01:01	ITDIHIKY	8	4	0.889124	Protein	Q709C8-3;Q709C8-2;Q709C8-4;Q709C8	ITD-IHIKY	102.4	0.04	0.087	TRUE	FALSE	FALSE
A*01:01	ITDIQIPLDY	10	15	0.78336	Protein	Q9UNP9-2;Q9UNP9;E9PK21;A8KAM9;Q9UNP9-3	ITDIQPLDY	8.76	0.012	0.009	TRUE	FALSE	FALSE
A*01:01	ITDIVNKY	8	2	0.809303	Protein	Q86X10-3;Q86X10-2;B3KWL5;Q86X10;A2A2F0	ITD-IVNKY	186.63	0.045	0.14	TRUE	FALSE	FALSE
A*01:01	ITDLHCGFGGPL	12	1	0.25214	Protein	U3KQC1;A0A0A0MQU0;K7EIR0;Q9BV38;K7EML4	ITDGFGGPL	5144.47	11.68	1.531	FALSE	FALSE	FALSE
A*01:01	ITDLPDHLLSY	11	11	0.841531	Protein	C9J7I0	ITDDHLLSY	11.47	0.004	0.011	TRUE	FALSE	FALSE
A*01:01	ITDPDPDIRY	10	1	0.740141	Protein	B4DZD5;P42345;B4E2H2	ITDPDPIRY	19.97	0.003	0.017	TRUE	FALSE	FALSE
A*01:01	ITDSAGHILY	10	2	0.860178	Protein	Q53GF9;A0A024R6I3;P49755;G3V2K7;B4DL12	ITDSGHILY	4.6	0.002	0.007	TRUE	FALSE	FALSE
A*01:01	ITDSSLGRIAQY	12	2	0.577607	Protein	Q8N1E6	ITDSSIAQY	25.27	0.03	0.021	TRUE	FALSE	FALSE
A*01:01	ITDSTMLQAIERY	13	5	0.869354	Protein	Q9Y678	ITDSTMLQY	11.32	0.033	0.011	TRUE	FALSE	FALSE
A*01:01	ITDVSWRLEY	10	8	0.645207	Protein	H0Y4W0;Q9UBI1;H0Y4E5;R4GNF2	ITDVSRLEY	5.53	0.009	0.007	TRUE	FALSE	FALSE
A*01:01	ITDYALIAIGRY	12	3	0.675746	Protein	H7C835;Q9UF56;Q9UF56-3;Q9UF56-2	ITDYALIRY	34.04	0.141	0.033	TRUE	FALSE	FALSE
A*01:01	ITEIINPNY	9	1	0.769997	Protein	Q92835-2;Q92835-3;H0Y5Q9;Q92835;H7C403	ITEIINPNY	92.81	0.053	0.081	FALSE	FALSE	FALSE
A*01:01	ITEKGISDLAQHY	13	10	0.788534	Protein	Q2TU64;Q59H77;B4DUR8;B3KX11;P49368	ITEDLAQHY	327.57	0.078	0.211	TRUE	FALSE	FALSE
A*01:01	ITELLYKDGRY	11	2	0.657656	Protein	P42704;E5KNY5;B4DSR0	ITELKDGRY	283.4	0.2	0.189	FALSE	FALSE	FALSE
A*01:01	ITQGTPLKY	9	7	0.957665	Protein	C9J7T7;Q9Y618-5;A0A384DVL6;C9JE98;C9J0Q5	ITQGTPLKY	93.9	0.019	0.082	TRUE	FALSE	FALSE
A*01:01	ITSSNFLHY	9	2	0.7478	Protein	H0Y2S2;Q9NXB0;Q9NXB0-2;J9PBQ5;J3KSC6	ITSSNFLHY	23.47	0.032	0.019	FALSE	FALSE	FALSE
A*01:01	IVDAEWNILY	10	1	0.789707	Protein	Q99832;Q99832-2;B7Z1C9;Q99832-3;B7Z7I4	IVDAENILY	20.64	0.036	0.018	TRUE	FALSE	FALSE
A*01:01	IVDDFFIGRY	10	9	0.821052	Protein	E9PI23;A2RU14	IVDDFFIRY	83.68	0.08	0.075	TRUE	FALSE	FALSE
A*01:01	IVDEAIYY	8	2	0.7902	Protein	B2R4D5;F8VR50;Q2LE71;B4DM63;O15145	IVDEA-IYY	662.34	0.152	0.345	TRUE	FALSE	FALSE
A*01:01	IVDEFAMRY	9	1	0.621811	Protein	F8W8M9;A0A3B3ISZ1;A0A1B0GUS7;B1AM27;Q9UPW8	IVDEFAMRY	11.03	0.005	0.011	TRUE	FALSE	FALSE
A*01:01	IVDEVNGLISMY	12	1	0.782313	Protein	Q8IXJ3;A8KAP3;Q15029-3;B3KX19;Q15029	IVDEVNSMY	138.46	0.107	0.11	TRUE	FALSE	FALSE
A*01:01	IVDLTCLT	8	1	0.64104	Protein	A0A024RD91;Q9ULZ2	IVDLTCLT-	17015.7	14.914	6.67	FALSE	FALSE	FALSE
A*01:01	IVDNPADFY	9	2	0.775961	Protein	Q5QJE6	IVDNPADFY	22.64	0.01	0.019	TRUE	FALSE	FALSE
A*01:01	IVDTVTLQY	9	2	0.764751	Protein	Q6ZSS7	IVDTVTLQY	10.81	0.003	0.011	TRUE	FALSE	FALSE
A*01:01	IVENVNVIISTY	12	2	0.725369	Protein	P13639;A0A384N6H1;B4DPU3;B4DMC6;B4DRE8	IVENVNSTY	2662.36	0.492	0.925	TRUE	FALSE	FALSE
A*01:01	KIDALQLEY	9	3	0.746684	Protein	Q7Z569-2;Q7Z569;J3KNN7;A8K2W4;Q59H81	KIDALQLEY	54.79	0.031	0.052	TRUE	FALSE	FALSE
A*01:01	KLDDLHTLY	9	2	0.914362	Protein	T1WFC1;F5H1Y4;Q9HD26;Q9HD26-2	KLDDLHTLY	24.77	0.007	0.02	TRUE	FALSE	FALSE
A*01:01	KLDLLEQEY	9	1	0.686096	Protein	Q86XR8-3;A0A024R3B1;Q86XR8;Q86XR8-2;Q86XR8-5	KLDLLEQEY	277.46	0.051	0.186	TRUE	FALSE	FALSE
A*01:01	KLDQLIEFY	9	1	0.589645	Protein	B4DQ61;Q92835-2;Q92835	KLDQLIEFY	118.89	0.046	0.098	FALSE	FALSE	FALSE
A*01:01	KLNDLFGDAALY	12	1	0.504804	Protein	D3DVR8;P42858	KLNDDAALY	2218.15	0.911	0.815	TRUE	FALSE	FALSE
A*01:01	KMDDLNLHY	9	1	0.905256	Protein	Q8NCJ5;B7Z1Y3;F8VWW7;A0A024RAX4	KMDDLNLHY	60.28	0.019	0.057	TRUE	FALSE	FALSE
A*01:01	KSDALETLGFLNHY	14	1	0.542253	Protein	M0QXS5;M0QYT0;A0A384N6C7;P14866;P14866-2	KSDALETLY	365.22	0.335	0.23	TRUE	FALSE	FALSE
A*01:01	KSDLFFHDY	9	13	0.959931	Protein	P35251;P35251-2	KSDLFFHDY	30.2	0.04	0.029	TRUE	FALSE	FALSE
A*01:01	KSDSGKPYYY	10	1	0.496062	Protein	O75400-2;O75400-3;O75400;H0YG38;H7C2N3	KSDSGPYYY	70.48	0.023	0.065	TRUE	FALSE	FALSE
A*01:01	KSDVEAIFSKY	11	4	0.788166	Protein	A8K9A4;D3DPI2;Q6PKD2;B2R603;G3V4C1	KSDVEASKY	244.84	0.079	0.17	TRUE	FALSE	FALSE
A*01:01	KSDVETIFSKY	11	2	0.623722	Protein	Q9UKM9;Q5QPM1;Q5QPM2;B4DSJ1;Q53GL6	KSDVETSKY	187.39	0.06	0.14	TRUE	FALSE	FALSE
A*01:01	KSDVHLNFY	9	2	0.765096	Protein	Q14527;A0A0C4DGA6;A8K5B6;Q14527-2;Q59GQ7	KSDVHLNFY	13.69	0.01	0.013	TRUE	FALSE	FALSE
A*01:01	KSDVWSFGILLY	12	2	0.636345	Protein	P42685;B2R8C2;P07948;A8K379;P42685-2	KSDFGILLY	22.82	0.08	0.019	TRUE	FALSE	FALSE
A*01:01	KSELGLNFY	9	1	0.690488	Protein	Q9NRM2;A4D0S7;Q8TCK8;H7C460	KSELGLNFY	81.93	0.048	0.074	TRUE	FALSE	FALSE
A*01:01	KSELPLVIGTFLY	13	5	0.660793	Protein	C9JHH7;C9JWG4;C9JNK4;C9JMY2;C9JJU1	KSELGTFLY	230.67	0.286	0.164	TRUE	FALSE	FALSE
A*01:01	KTALLEGLEVDQY	13	1	0.556134	Protein	Q8NF64-3;Q8NF64-2;A0A024QZN6;Q8NF64;D4YW76	KTALEVDQY	1801.91	0.837	0.696	TRUE	FALSE	FALSE
A*01:01	KTDDLTMVLY	10	3	0.46329	Protein	B3KW31;Q96RL7-3;Q96RL7-4;A0A024R223;Q96RL7	KTDDLTMLY	5.72	0.003	0.008	TRUE	FALSE	FALSE
A*01:01	KTDHFIFTY	9	1	0.682349	Protein	A6NL66;E7EP35;Q9Y546	KTDHFIFTY	7.87	0.004	0.009	TRUE	FALSE	FALSE
A*01:01	KTDLDLDGY	9	1	0.652185	Protein	A8K5P4;Q9UBC2;M0R165;A5PKY0;Q9UBC2-3	KTDLDLDGY	35.46	0.03	0.034	TRUE	FALSE	FALSE
A*01:01	KTDLLLEPYNKY	12	21	0.840078	Protein	B4E3S1;P35579;P35579-2;A0A024R1N1;Q86XU5	KTDEPYNKY	186.18	0.059	0.139	TRUE	FALSE	FALSE
A*01:01	KTEDPDLPAFY	11	5	0.610203	Protein	I3L0J9;Q6P2Q9	KTEDPDLFY	165.85	0.028	0.125	TRUE	FALSE	FALSE
A*01:01	KTELERAFGYY	11	1	0.347374	Protein	P84103;P84103-2;B2R6F3;A0A087X2D0	KTELEFGYY	343.64	0.22	0.219	TRUE	FALSE	FALSE
A*01:01	KTELQFSDYY	10	1	0.657039	Protein	A8K8X0;Q14CX7;Q14CX7-2	KTELQSDYY	26.01	0.04	0.022	FALSE	FALSE	FALSE
A*01:01	KTETEPVFWYY	11	5	0.693728	Protein	Q8TEQ0;Q8TEQ0-2	KTETEPWYY	221.27	0.065	0.16	TRUE	FALSE	FALSE
A*01:01	KTEYALWNY	9	2	0.584889	Protein	Q4ADV7-3;Q4ADV7;H0YFN7;H0YGC4;Q4ADV7-2	KTEYALWNY	128.18	0.092	0.104	TRUE	FALSE	FALSE
A*01:01	KTILPAAAQDVYY	13	1	0.589286	Protein	Q6IBR0;B4DNJ5;Q96HX3;Q53EP4;B7Z4L4	KTAAQDVYY	1988.12	0.862	0.752	TRUE	FALSE	FALSE
A*01:01	LADIYRELY	9	18	0.852365	Protein	Q9Y6J9;A8K0D4;A0A024R5A7	LADIYRELY	19.27	0.034	0.017	TRUE	FALSE	FALSE
A*01:01	LADLKVQLY	9	1	0.74777	Protein	E9PQY2;Q9NQP4;B2R548	LADLKVQLY	24.74	0.008	0.02	TRUE	FALSE	FALSE
A*01:01	LADLNNVRFSAY	12	2	0.516479	Protein	A0A0S2Z3J7;B4DSV7;E7ESB2;A0A0S2Z3B5;P11532-5	LADLNNVRY	338.04	0.373	0.217	TRUE	FALSE	FALSE
A*01:01	LADVNNIGKY	10	1	0.842267	Protein	B4DQG5;P28838-2;V9HW38;P28838	LADVNNIKY	166.17	0.125	0.125	TRUE	FALSE	FALSE
A*01:01	LADWVSGKISFY	12	3	0.695743	Protein	Q9NVN8;A0A024R9Y6;Q05DU1	LADGKISFY	74.02	0.233	0.068	TRUE	FALSE	FALSE
A*01:01	LAEEITLHY	9	2	0.952014	Protein	B4E199;Q0D2I0;B3KPF8;Q6ZSY5;Q6ZSY5-2	LAEEITLHY	48.3	0.014	0.046	TRUE	FALSE	FALSE
A*01:01	LAEWKSLEY	9	2	0.37665	Protein	P78527;P78527-2	LAEWKSLEY	81.49	0.068	0.073	TRUE	FALSE	FALSE
A*01:01	LAEYDLDKY	9	2	0.954118	Protein	Q9BV37;Q86X79;F8VZ56;B4DJV5;Q05BL3	LAEYDLDKY	316.36	0.125	0.205	TRUE	FALSE	FALSE
A*01:01	LIDADPYLKY	10	21	0.911607	Protein	P20248	LIDDPYLKY	48.07	0.032	0.046	TRUE	FALSE	FALSE
A*01:01	LIDMERQGDVY	11	1	0.314384	Protein	D3DV75;A0A3B3IRQ9;A0A024DAK3;P55265-2;P55265-4	LIDMQGDVY	495.46	0.23	0.28	FALSE	FALSE	FALSE
A*01:01	LIDNGVTKGFVY	12	10	0.779262	Protein	A0A2X0U4N6;B4E0Q3;Q6XZF7-2;B3KY33;Q6XZF7	LIDNGVTKY	227.83	0.154	0.163	TRUE	FALSE	FALSE
A*01:01	LIDNSFNRY	9	1	0.574249	Protein	B4DKU3;Q8IY81	LIDNSFNRY	30.41	0.021	0.029	TRUE	FALSE	FALSE
A*01:01	LIDPDLTQY	9	7	0.937129	Protein	Q86YB2;F5H658;B7Z8F4;A8K6J9;Q14562	LIDPDLTQY	96.94	0.01	0.084	TRUE	FALSE	FALSE
A*01:01	LIDQDARDLY	10	13	0.605934	Protein	H0YNP5;A0A024R5Z7;H0YN42;V9HW65;H0YL33	LIDDARDLY	49.57	0.05	0.047	TRUE	FALSE	FALSE
A*01:01	LIDSRPFVEY	10	4	0.873871	Protein	Q9BY84-2;Q8IVT8;Q96N49;A0A024RAR2;Q9BY84	LIDSRPFEY	74.76	0.067	0.068	TRUE	FALSE	FALSE
A*01:01	LIDVGFSKSSY	11	1	0.327485	Protein	Q9UJX2-3;Q9UJX2	LIDVGKSSY	812.18	0.242	0.399	FALSE	FALSE	FALSE
A*01:01	LIDVGTGYY	9	21	0.865563	Protein	H3BPF6;Q99471-3;Q99471	LIDVGTGYY	15.48	0.032	0.014	TRUE	FALSE	FALSE
A*01:01	LIDYDMVHY	9	3	0.901976	Protein	Q53HG9;H1UBN3;Q5U0M0;O95067;Q7Z4Z4	LIDYDMVHY	72.69	0.053	0.067	TRUE	FALSE	FALSE
A*01:01	LIEAFSQRY	9	3	0.558838	Protein	A0A1W2PRJ5;A0A2R8Y7T6;A0A1W2PPU7;A0A087WWK8;A0A2R8Y695	LIEAFSQRY	141.93	0.078	0.112	FALSE	FALSE	FALSE
A*01:01	LIEEALQKY	9	1	0.763516	Protein	Q9UJX2-3;Q9UJX2	LIEEALQKY	645.64	0.083	0.338	TRUE	FALSE	FALSE
A*01:01	LIEEGGLQHLY	11	5	0.948031	Protein	Q9C0D3;B3KTI5;B4DK95;Q9C0D3-2	LIEEGGLLY	321.72	0.078	0.208	TRUE	FALSE	FALSE
A*01:01	LIEPHYQPWSY	11	7	0.738471	Protein	Q96C34;Q96C34-2	LIEPHPWSY	1839.18	0.208	0.707	TRUE	FALSE	FALSE
A*01:01	LLDAVLIDY	9	1	0.749357	Protein	O14980;B4DR01;B7ZB16;B3KWD0	LLDAVLIDY	60.64	0.09	0.057	TRUE	FALSE	FALSE
A*01:01	LLDDAQRLLY	10	21	0.944618	Protein	Q59FT8;M0R2W2;Q6ZML0;E5RHZ9;Q96HQ0-4	LLDDAQLLY	9.52	0.008	0.01	TRUE	FALSE	FALSE
A*01:01	LLDDHDYGSWGNY	13	10	0.761872	Protein	D6RBB6;Q6UWI2	LLDDHDYNY	224.69	0.207	0.161	TRUE	FALSE	FALSE
A*01:01	LLDDSVRVY	9	2	0.488641	Protein	F8VZ44;Q53HS1;Q9NRG9;H3BU82	LLDDSVRVY	139.93	0.037	0.111	TRUE	FALSE	FALSE
A*01:01	LLDDTGLAY	9	1	0.811352	Protein	Q92600-2;Q92600;B4DJE1;Q92600-3;D5MQE1	LLDDTGLAY	11.13	0.006	0.011	TRUE	FALSE	FALSE
A*01:01	LLDEAQRLLY	10	3	0.735441	Protein	M0R1S7;F5H435;B3KS08;Q68DY9;M0R036	LLDEAQLLY	10.8	0.011	0.011	TRUE	FALSE	FALSE
A*01:01	LLDEHHISY	9	2	0.928937	Protein	Q69YQ0;Q59GT7;F8WAN1;B2RMV2;C9J8U1	LLDEHHISY	18.08	0.009	0.016	TRUE	FALSE	FALSE
A*01:01	LLDELLQKGY	10	3	0.738064	Protein	P61619;B3KQ68;B4DR61;B3KNF6;F8W776	LLDELLQKY	163.44	0.078	0.123	TRUE	FALSE	FALSE
A*01:01	LLDENKSLSTYY	12	4	0.812968	Protein	Q5U0C9;O43318-2;O43318;Q5U0D0;Q9UG54	LLDENSTYY	41.9	0.065	0.04	TRUE	FALSE	FALSE
A*01:01	LLDESRPLFERY	12	5	0.709191	Protein	Q9BU89	LLDESFERY	184.38	0.137	0.138	TRUE	FALSE	FALSE
A*01:01	LLDFSYEQY	9	1	0.849737	Protein	K7EMW4;Q969V3-2;B2RA56;Q969V3	LLDFSYEQY	26.34	0.019	0.023	TRUE	FALSE	FALSE
A*01:01	LLDIEQDTYRY	11	2	0.375332	Protein	O00184;Q15833;M0R0M7;Q53GF4;B4DY46	LLDQDTYRY	210.51	0.081	0.154	TRUE	FALSE	FALSE
A*01:01	LLDKPVFSFY	10	8	0.953766	Protein	M0QXC5;O96009;B4DV14	LLDPVFSFY	27.26	0.052	0.024	TRUE	FALSE	FALSE
A*01:01	LLDLDEELRY	10	29	0.935658	Protein	Q96FT9-3;G3V4X2;Q96FT9-4;Q96FT9-2;Q96FT9	LLDDEELRY	63.86	0.036	0.06	TRUE	FALSE	FALSE
A*01:01	LLDMYSLLK	9	1	0.741052	Protein	Q59EG6;Q9UNY4;A0A024R0F1	LLDMYSLLK	583.66	0.988	0.312	FALSE	FALSE	FALSE
A*01:01	LLDPAQKILY	10	2	0.796258	Protein	Q8NDW4;A0A087WTK3;A2RUI7;Q8NDW4-2;Q9UMP4	LLDPAQILY	24.78	0.014	0.02	TRUE	FALSE	FALSE
A*01:01	LLDPAQRTLY	10	6	0.499147	Protein	B2RD50;Q8N988;Q4G137;B4DM42;Q96NG5	LLDPAQTLY	23.86	0.013	0.02	TRUE	FALSE	FALSE
A*01:01	LLDPASFEY	9	2	0.861868	Protein	Q53HA9;A0A024R7E4;P29597;E9PPF2	LLDPASFEY	11.21	0.004	0.011	TRUE	FALSE	FALSE
A*01:01	LLDPGQRNIY	10	2	0.486117	Protein	Q9ULM2;C9JID3	LLDPGQNIY	124.36	0.041	0.101	TRUE	FALSE	FALSE
A*01:01	LLDPSQKNLY	10	17	0.807881	Protein	P51523;Q6ZQV5-2;Q9H942;A8K5C7;C9JIP4	LLDPSQNLY	31.78	0.012	0.031	TRUE	FALSE	FALSE
A*01:01	LLDPSVFHV	9	3	0.756612	Protein	Q9BVI4	LLDPSVFHV	1797.82	0.595	0.695	TRUE	FALSE	FALSE
A*01:01	LLDPSVFHVKY	11	1	0.562248	Protein	Q9BVI4	LLDPSHVKY	162.51	0.043	0.123	TRUE	FALSE	FALSE
A*01:01	LLDQGQLNKY	10	26	0.948725	Protein	Q00610;A0A087WVQ6;Q00610-2	LLDQGQLKY	49.25	0.027	0.047	TRUE	FALSE	FALSE
A*01:01	LLDSSQKNLY	10	3	0.935321	Protein	Q5VT37;Q96BR6;A0A024R5S3;Q5VT36;E5RI66	LLDSSQNLY	25.74	0.026	0.022	TRUE	FALSE	FALSE
A*01:01	LLDTAQKNLY	10	1	0.472818	Protein	M0QYG4;M0R1H2;Q8N883-2;Q8N883	LLDTAQNLY	26.76	0.035	0.024	TRUE	FALSE	FALSE
A*01:01	LLDTAQQIVY	10	1	0.381816	Protein	P21506;B4DXW5;F8WD46;A0A088AWK7;F5H311	LLDTAQQVY	58.35	0.066	0.055	FALSE	FALSE	FALSE
A*01:01	LLDTAQRALY	10	6	0.702899	Protein	Q96I98;M0R090;O75467;M0R0B1;A0A024R4R8	LLDTAQALY	20.69	0.045	0.018	TRUE	FALSE	FALSE
A*01:01	LLDTFIGEGKEY	12	3	0.790942	Protein	B4DUP2;Q16851-2;B2RAN1;A0A140VKE1;E7EUC7	LLDTEGKEY	299.87	0.259	0.197	TRUE	FALSE	FALSE
A*01:01	LLDTNRYLY	9	6	0.620915	Protein	Q9NWU2	LLDTNRYLY	13.63	0.017	0.013	TRUE	FALSE	FALSE
A*01:01	LLDTPAQLWY	10	1	0.753453	Protein	A0A1U9X7S4;Q53HH3;Q92759-2;B4DNU0;Q92759	LLDTPAQLY	23.15	0.027	0.019	TRUE	FALSE	FALSE
A*01:01	LLDTPVKTQY	10	1	0.472883	Protein	E7EQS8;A0A024RDF7;Q6N021;Q6N021-3;Q6N021-2	LLDPVKTQY	218.18	0.038	0.158	TRUE	FALSE	FALSE
A*01:01	LLDTTEKYLY	10	1	0.466595	Protein	Q8N587;C9J7U2;F8W7U5;C9IZJ4	LLDTTEYLY	28.3	0.051	0.026	TRUE	FALSE	FALSE
A*01:01	LLDVGLRY	8	4	0.790996	Protein	Q4AC94-2;Q4AC94-1;Q4AC94-3;Q4AC94;Q4AC94-4	LLD-VGLRY	307.39	0.142	0.2	TRUE	FALSE	FALSE
A*01:01	LLDYSFQH	8	1	0.451131	Protein	Q9H9F9	LLD-YSFQH	16975	4.928	6.644	FALSE	FALSE	FALSE
A*01:01	LLEDFLEHEGY	11	2	0.719216	Protein	A0A2R8YER1;A0A2R8Y5Z7;A0A2R8YDJ9;A0A2R8Y521;A0A2R8Y212	LLEDEHEGY	1820.94	0.341	0.702	TRUE	FALSE	FALSE
A*01:01	LLEDFLEHEGYKY	13	12	0.899546	Protein	A0A2R8YER1;A0A2R8Y5Z7;A0A2R8YDJ9;A0A2R8Y521;A0A2R8Y212	LLEDEGYKY	1146.25	0.332	0.509	TRUE	FALSE	FALSE
A*01:01	LLEDKHFQSY	10	3	0.889363	Protein	A0A087X295;B4E256;E9PDU5;B4DK45;Q9NNW5	LLDKHFQSY	190.52	0.091	0.142	TRUE	FALSE	FALSE
A*01:01	LLEELDKTPWQY	12	4	0.964094	Protein	Q9UJ83-3;B3KPX4;Q9UJ83;B4DRJ1;Q9UJ83-2	LLDKTPWQY	459.63	0.196	0.268	TRUE	FALSE	FALSE
A*01:01	LLEELPILY	9	1	0.769246	Protein	Q9UBW5-3;Q9UBW5-2;A0A087X188;S4R418;Q9UBW5	LLEELPILY	43.98	0.035	0.042	TRUE	FALSE	FALSE
A*01:01	LLEIAQTHY	9	2	0.785582	Protein	Q8WXG6;Q8WXG6-6;Q8WXG6-4;A0A0A0MRB5;Q8WXG6-8	LLEIAQTHY	306.48	0.079	0.2	TRUE	FALSE	FALSE
A*01:01	LLEIAQTHYY	10	2	0.721669	Non-coding	NR_164838-9;NR_164838-7;NR_164838-4;NR_164838-1;NR_164838-3	LLEAQTHYY	95.23	0.108	0.083	TRUE	FALSE	FALSE
A*01:01	LLEKEILFY	9	14	0.919157	Protein	O60264;B7ZAX9;B4DZC0	LLEKEILFY	63.48	0.046	0.059	TRUE	FALSE	FALSE
A*01:01	LLELLHELY	9	4	0.871929	Protein	Q8NC56;A0A220T1R7;A0A024RCZ1	LLELLHELY	88.53	0.097	0.078	TRUE	FALSE	FALSE
A*01:01	LLENDVSTLGY	11	2	0.591002	Protein	Q7Z6Z7;A0A024R9W5;Q5H924;Q3B7K0;A0A024R9Y3	LLDVSTLGY	98.38	0.139	0.085	TRUE	FALSE	FALSE
A*01:01	LLEQGGRLSSFY	12	12	0.704194	Protein	Q86XL3;Q86XL3-2;A0A220T1R9	LLEQGSSFY	312.5	0.239	0.203	TRUE	FALSE	FALSE
A*01:01	LLEVDATSKY	10	3	0.826051	Protein	Q9UK61-4;Q9UK61;A0A024R363;Q9UK61-2;A0A087X0F1	LLEDATSKY	373.76	0.094	0.234	TRUE	FALSE	FALSE
A*01:01	LLYESPERY	9	6	0.801679	Protein	Q03518;A0A0S2Z4R8;B2R9F3;A0A0S2Z5A6;A0A1V0E3X9	LLYESPERY	2190.53	0.265	0.808	TRUE	FALSE	FALSE
A*01:01	LMDIFGDRY	9	2	0.687409	Protein	A0A090N7X0;B4DWA5;G5E9W9;Q9NUV9;B4DWN0	LMDIFGDRY	20.11	0.038	0.017	TRUE	FALSE	FALSE
A*01:01	LQERNPENWAY	11	1	0.434215	Protein	Q9BXJ9-4;B4E2T6;Q9BXJ9;Q58F05;A0A0B4J1W3	LQEPENWAY	7910.17	0.876	2.348	FALSE	FALSE	FALSE
A*01:01	LSDALLNKLIGRY	13	3	0.656849	Protein	P33981;D6RF82;D6REX1;P33981-2;D6RIC6	LSDALLNRY	73.46	0.267	0.067	TRUE	FALSE	FALSE
A*01:01	LSDFGLERY	9	10	0.962144	Protein	Q8IX90;Q8IX90-3	LSDFGLERY	7.03	0.004	0.008	TRUE	FALSE	FALSE
A*01:01	LSDGGLLLSY	10	1	0.468128	Protein	Q13085-3;A2NX49;Q13085-4;Q13085;Q13085-2	LSDGGLLLY	5.72	0.005	0.008	TRUE	FALSE	FALSE
A*01:01	LSDHLINQGY	10	7	0.701263	Protein	Q9BYT1;H0UI90;Q9BYT1-2	LSDHLINQY	16.14	0.02	0.015	TRUE	FALSE	FALSE
A*01:01	LSDIASALRY	10	9	0.827551	Protein	G3V105;A8K4I7;Q59GL9;B4DP95;E5RGW5	LSDASALRY	4.73	0.007	0.007	TRUE	FALSE	FALSE
A*01:01	LSDIASALRYL	11	1	0.775463	Protein	E5RGW5;O14920-3;Q59GL9;Q32ND9;A8K4I7	LSDASALRY	211.64	0.495	0.155	TRUE	FALSE	FALSE
A*01:01	LSDIASLKALY	11	1	0.749935	Protein	Q9NXN4-2;Q9NXN4	LSDIASLLY	8.97	0.026	0.009	TRUE	FALSE	FALSE
A*01:01	LSDIEWHIY	9	6	0.914457	Protein	Q16854-5;D6W5I0;Q16854-3;E5KSL5;Q16854	LSDIEWHIY	8.12	0.009	0.009	FALSE	FALSE	FALSE
A*01:01	LSDIGSGIRY	10	5	0.651233	Protein	Q59GT1;O15111;Q562E6	LSDGSGIRY	10.25	0.007	0.01	TRUE	FALSE	FALSE
A*01:01	LSDIGSGIRYL	11	20	0.765592	Protein	O15111;Q562E6;Q59GT1	LSDGSGIRY	985.37	0.462	0.46	TRUE	FALSE	FALSE
A*01:01	LSDILRFIY	9	2	0.526962	Protein	O94955;A0A024RAM7	LSDILRFIY	8.34	0.036	0.009	TRUE	FALSE	FALSE
A*01:01	LSDIVIEKY	9	5	0.863918	Protein	A0A3B3IT90;A0A3B3ISN9;A2RRH5;A0A3B3IRT0;A0A3B3IS64	LSDIVIEKY	14.83	0.004	0.014	TRUE	FALSE	FALSE
A*01:01	LSDLGKLSY	9	17	0.933146	Protein	Q9H7Z6-2;H3BMX5;Q9H7Z6	LSDLGKLSY	8.24	0.003	0.009	TRUE	FALSE	FALSE
A*01:01	LSDLGRLSY	9	4	0.766381	Protein	A0A3F2YNX6;Q8WYB5;A7E2B6;Q92794;A0A3B3ISF5	LSDLGRLSY	6.4	0.003	0.008	TRUE	FALSE	FALSE
A*01:01	LSDLKLDYL	9	1	0.549098	Non-coding	NR_144376-2;NR_144376-1	LSDLKLDYL	1310.69	0.858	0.558	FALSE	FALSE	FALSE
A*01:01	LSDLLDWKY	9	13	0.858462	Protein	Q53ER0;P13807-2;A8K6K7;B7Z6I6;B7Z255	LSDLLDWKY	8.07	0.008	0.009	FALSE	FALSE	FALSE
A*01:01	LSDPGEPLSF	10	1	0.46651	Protein	A8K5I2;Q9ULW6;Q9ULW6-2	LSDPGPLSF	536.62	0.161	0.293	FALSE	FALSE	FALSE
A*01:01	LSDSFSDLYSSY	12	4	0.742742	Protein	Q9BTX1-5;Q9BTX1;Q9BTX1-2;Q9BTX1-4;Q9BTX1-3	LSDSFSDLY	7.65	0.035	0.009	TRUE	FALSE	FALSE
A*01:01	LSDVFPGVQY	10	9	0.741792	Protein	Q14204;A0A2R8YFZ7	LSDVPGVQY	12.25	0.013	0.012	TRUE	FALSE	FALSE
A*01:01	LSEERVWEY	9	1	0.526097	Protein	A0A024R9R3;Q9P253	LSEERVWEY	25.33	0.013	0.021	TRUE	FALSE	FALSE
A*01:01	LSEINKPNFY	10	32	0.935366	Protein	B7Z854;J3KP30;Q5QJE6	LSENKPNFY	51.21	0.058	0.049	TRUE	FALSE	FALSE
A*01:01	LSELSNPEISKY	12	3	0.851416	Protein	F5H269;Q9Y485;D3DT08;B2RWN7;F1T0K4	LSEPEISKY	210.72	0.088	0.154	TRUE	FALSE	FALSE
A*01:01	LSELSVLAEMQC	12	1	0.536766	Non-coding	NR_126028-1;NR_126028-3;NR_126028-2	LSELSVLQC	25503.8	41.083	16.359	FALSE	FALSE	FALSE
A*01:01	LSETFLHIY	9	1	0.794435	Protein	B2R789;A0A024RDV4;B3KRK6;B3KT75;Q9Y3M8-4	LSETFLHIY	17.79	0.032	0.016	FALSE	FALSE	FALSE
A*01:01	LSEVQLQQY	9	1	0.722546	Protein	C9JDG3;H7BZZ3;F8WER3;Q07912;Q07912-3	LSEVQLQQY	41.92	0.014	0.04	FALSE	FALSE	FALSE
A*01:01	LTDDDLLRY	9	4	0.904482	Protein	B4DNJ3;Q04446;Q59ET0;E9PGM4;B4DUF1	LTDDDLLRY	4.05	0.001	0.006	FALSE	FALSE	FALSE
A*01:01	LTDDGNKWLY	10	5	0.862189	Protein	B4DM22;Q13200-2;Q59EG8;Q9NSM5;Q13041	LTDDGNWLY	4.94	0.002	0.007	TRUE	FALSE	FALSE
A*01:01	LTDDHVQFLIY	11	4	0.55349	Protein	Q16539-2;Q16539-4;B5TY33;L7RSM2;Q16539	LTDDHVQFY	7.16	0.003	0.009	TRUE	FALSE	FALSE
A*01:01	LTDEGYEHFY	10	1	0.616336	Protein	Q96L67;B1AKJ5;F5H7V1;Q6UUU9;B4DYV0	LTDEGEHFY	4.28	0.002	0.006	TRUE	FALSE	FALSE
A*01:01	LTDEQIRFLY	10	10	0.88891	Protein	Q8IXT5;B9ZVT1	LTDEQIFLY	4.71	0.005	0.007	TRUE	FALSE	FALSE
A*01:01	LTDFDIRFY	9	26	0.942738	Protein	P19784	LTDFDIRFY	9.65	0.007	0.01	TRUE	FALSE	FALSE
A*01:01	LTDFIQKY	8	19	0.909701	Protein	H3BVA8;Q15046-2;Q15046	LTD-FIQKY	79.2	0.04	0.072	TRUE	FALSE	FALSE
A*01:01	LTDFIREEY	9	15	0.732617	Protein	B7ZLP8;A2RTX5;A2RTX5-2	LTDFIREEY	5.83	0.004	0.008	FALSE	FALSE	FALSE
A*01:01	LTDFPSARVPS	11	1	0.307924	Protein	Q9UKB5	LTDFPSARS	8603.37	4.997	2.565	FALSE	FALSE	FALSE
A*01:01	LTDGHPLTL	9	2	0.928429	Protein	H3BUX3;Q8N4H5-3;F8W8Z9;Q8N4H5-2;H0YFG9	LTDGHPLTL	232.92	0.146	0.165	TRUE	FALSE	FALSE
A*01:01	LTDGVSQIHY	10	1	0.699461	Protein	B5MC89;Q6YHU6;F5H3M9;Q6YHU6-5;Q6YHU6-3	LTDGVSQHY	8.69	0.003	0.009	TRUE	FALSE	FALSE
A*01:01	LTDHTVTFLQY	11	2	0.557293	Protein	J3QLM6;B3KUM8;E7EN92;Q7Z6J9;Q7Z6J9-2	LTDHTVLQY	9.61	0.009	0.01	TRUE	FALSE	FALSE
A*01:01	LTDIFQHDTY	10	14	0.89003	Protein	Q96BQ5	LTDIFQHTY	5.86	0.008	0.008	TRUE	FALSE	FALSE
A*01:01	LTDIHGNVLQY	11	1	0.451585	Protein	B7Z9J7;V9HWF9;A6NF51;O95861-4;O95861	LTDGNVLQY	10.72	0.005	0.011	FALSE	FALSE	FALSE
A*01:01	LTDITKGVQY	10	21	0.67777	Protein	Q8TA90;P13639;A0A384N6H1;Q6W6M8;B4DPU3	LTDTKGVQY	12.94	0.006	0.013	TRUE	FALSE	FALSE
A*01:01	LTDIVVEVD	9	1	0.3886	Protein	C9JAA6;Q8NFY9	LTDIVVEVD	11894	9.421	3.845	FALSE	FALSE	FALSE
A*01:01	LTDLEIKFQY	10	5	0.767218	Protein	Q13568;Q13568-4;Q13568-3;A0A024R756;A0A0G2UUJ1	LTDEIKFQY	12.68	0.01	0.012	TRUE	FALSE	FALSE
A*01:01	LTDLYLTNNA	10	1	0.356867	Protein	P59046-5;P59046-7;A8K407;P59046;P59046-6	LTDYLTNNA	2585.68	3.689	0.904	FALSE	FALSE	FALSE
A*01:01	LTDPAIVKV	9	2	0.858121	Protein	B4DFE4;B4DKG8;Q01780-2;Q59G73;Q01780	LTDPAIVKV	757.15	0.271	0.38	TRUE	FALSE	FALSE
A*01:01	LTDPIQGTEY	10	1	0.753645	Protein	Q9UDY8-2;A8K5S1;Q9UDY8	LTDPIQTEY	7.07	0.002	0.008	TRUE	FALSE	FALSE
A*01:01	LTDPMFRGIY	10	2	0.369061	Protein	E5RH86;U3KQS5;G5EA19;Q6P1N9;E5RG17	LTDPFRGIY	9.2	0.035	0.01	TRUE	FALSE	FALSE
A*01:01	LTDRLASLY	9	1	0.8307	Protein	Q5W0V3-2;Q5W0V3	LTDRLASLY	2.85	0.001	0.005	TRUE	FALSE	FALSE
A*01:01	LTDTFTAYYR	10	8	0.948688	Protein	Q68CL5-1;Q68CL5-5;Q68CL5;A0A087X0Q8;K7EKC0	LTDTFTAYY	15.95	0.2	0.015	TRUE	FALSE	FALSE
A*01:01	LTDTFYYRL	9	17	0.947293	Protein	Q5TEJ8-5;Q5TEJ8-6;Q5TEJ8-3;Q5TEJ8;H7C124	LTDTFYYRL	188.63	0.49	0.141	TRUE	FALSE	FALSE
A*01:01	LTDYDIRFY	9	30	0.924431	Protein	Q5U5J2;B5BUH5;Q2I0Y7;P68400;V9GYA2	LTDYDIRFY	10.73	0.007	0.011	TRUE	FALSE	FALSE
A*01:01	LTDYDIRFYMY	11	2	0.4498	Protein	Q5U5J2;B5BUH5;Q2I0Y7;P68400;V9GYA2	LTDYDIYMY	19.65	0.056	0.017	TRUE	FALSE	FALSE
A*01:01	LTDYFLKDEY	10	13	0.926862	Protein	Q53FJ3;Q08AK7;Q13107;H7C189;Q53H56	LTDYLKDEY	6.58	0.032	0.008	TRUE	FALSE	FALSE
A*01:01	LTEAMWDRA	9	1	0.699978	Protein	G3V145	LTEAMWDRA	2160.82	2.985	0.801	FALSE	FALSE	FALSE
A*01:01	LTEEFRLNY	9	4	0.8469	Protein	Q86TW2-2;Q86TW2;Q86TW2-3	LTEEFRLNY	13.01	0.013	0.013	TRUE	FALSE	FALSE
A*01:01	LTEEINKWRLLY	12	7	0.868792	Protein	O75330;O75330-4;Q6PG44;O75330-3;O75330-2	LTEEINLLY	16.38	0.052	0.015	TRUE	FALSE	FALSE
A*01:01	LTEIAGVSVSQY	12	4	0.768899	Protein	O14980	LTEIAGSQY	119.32	0.099	0.098	TRUE	FALSE	FALSE
A*01:01	LTEIKGSVY	9	1	0.674981	Protein	A0A0S2Z623;Q96AP4;X6R6X3;A0A0S2Z644;A0A0S2Z605	LTEIKGSVY	40.5	0.029	0.039	TRUE	FALSE	FALSE
A*01:01	LTEITKGWLY	10	10	0.674942	Protein	C9K080;M1VE86;Q6UXM1-2;Q6UXM1;M1V487	LTETKGWLY	14.43	0.036	0.014	TRUE	FALSE	FALSE
A*01:01	LTEIYGERLYETSY	14	1	0.243707	Protein	Q9UKN8;Q05CN7	LTEIYGTSY	322.94	0.655	0.209	TRUE	FALSE	FALSE
A*01:01	LTELLERAAFY	11	5	0.442816	Protein	Q8N697	LTEERAAFY	59.02	0.124	0.055	TRUE	FALSE	FALSE
A*01:01	LTELMFEHY	9	6	0.937183	Protein	O96019-2;O96019;H7C5S0;Q6FI97;Q53FS0	LTELMFEHY	18.71	0.032	0.017	TRUE	FALSE	FALSE
A*01:01	LTELPPLDDY	10	21	0.801586	Protein	Q15796-2;Q15796;B7Z5N5;Q53XR6;K7EJX0	LTEPPLDDY	44.21	0.04	0.042	TRUE	FALSE	FALSE
A*01:01	LTELTTTATTTA	12	1	0.367058	Protein	Q9NYE4;A7Y9J9;Q14879;Q9HC84	LTETATTTA	13375.1	10.92	4.573	FALSE	FALSE	FALSE
A*01:01	LTEPPLNTPENREY	14	16	0.714238	Protein	F8WDR7;Q59FV6;A0A024RAI1;P61158;B4DT29	LTEPPLNEY	538.75	0.122	0.294	TRUE	FALSE	FALSE
A*01:01	LTEQYNEQY	9	1	0.69294	Protein	Q96PK6-5;Q9BWF3;A8K9U0	LTEQYNEQY	15.47	0.006	0.014	TRUE	FALSE	FALSE
A*01:01	LTETAIRALETY	12	1	0.536885	Protein	O00472;O00472-2;D6RC27;A0A0U1RR08	LTETAIETY	227.24	0.168	0.163	TRUE	FALSE	FALSE
A*01:01	LTETIYKNYY	10	1	0.620919	Protein	A8K5Q1;Q7L2J0;Q7L2J0-2	LTETIKNYY	21.45	0.053	0.018	TRUE	FALSE	FALSE
A*01:01	LTEVDNYHFY	10	10	0.781502	Protein	C9J0Y1;Q16236-2;Q16236-3;B4DNB0;C9J1A8	LTEDNYHFY	10.14	0.012	0.01	TRUE	FALSE	FALSE
A*01:01	LTEYFLNDKY	10	11	0.965957	Protein	Q9Y4E8-3;Q9Y4E8-2;Q9Y4E8	LTEYLNDKY	19.11	0.072	0.017	TRUE	FALSE	FALSE
A*01:01	LTEYLESSGQ	10	1	0.568775	Protein	Q2M1Z3;B7Z1P4;A0A2X0SF93	LTELESSGQ	19797.5	14.286	8.891	FALSE	FALSE	FALSE
A*01:01	LTEYLSTHY	9	1	0.956416	Protein	B4DUL5;P31930	LTEYLSTHY	15.3	0.01	0.014	FALSE	FALSE	FALSE
A*01:01	LTHSLVLHY	9	1	0.739221	Protein	E7EW19;O15379;O15379-2;E7ESJ6	LTHSLVLHY	176.58	0.105	0.132	TRUE	FALSE	FALSE
A*01:01	LTHWEQLDY	9	2	0.719105	Protein	Q9P0S3;F6WST4;A0A1B0GXE7	LTHWEQLDY	159.64	0.239	0.121	TRUE	FALSE	FALSE
A*01:01	LTLSILDRY	9	4	0.788588	Protein	Q59FJ0;A0A087WVV1;A0A140VJS6;B7Z478;P49721	LTLSILDRY	217.39	0.186	0.158	TRUE	FALSE	FALSE
A*01:01	LTWDGFPLHY	10	1	0.693474	Protein	E5KNX5;A0A1B0GW33;E5KNU5;E5KNV8;A8K5G6	LTDGFPLHY	6.97	0.006	0.008	TRUE	FALSE	FALSE
A*01:01	LVDDGWILAY	10	2	0.746213	Protein	Q4J6C6;Q4J6C6-2;Q4J6C6-3;Q4J6C6-4	LVDDGILAY	17.87	0.02	0.016	TRUE	FALSE	FALSE
A*01:01	LVDDPLEY	8	4	0.882733	Protein	Q9Y2D5-6;Q9Y2D5;Q9Y2D5-5;Q9Y2D5-7;Q9Y2D5-4	LVDD-PLEY	383.87	0.074	0.238	TRUE	FALSE	FALSE
A*01:01	LVDGYNVHY	9	2	0.828841	Protein	Q9H078-2;H0YGM0;Q9H078;A0A2U3TZY2;Q9H078-5	LVDGYNVHY	30.71	0.02	0.029	TRUE	FALSE	FALSE
A*01:01	LVDIVKGTNSYY	12	1	0.414491	Protein	P09874;B2R5W3;A0A024R3T8;B4E0E1	LVDGTNSYY	63.38	0.095	0.059	TRUE	FALSE	FALSE
A*01:01	LVDLAPLGY	9	16	0.841536	Protein	Q86UW9-2;Q86UW9;B4DDK4;E7ET89	LVDLAPLGY	15.14	0.018	0.014	TRUE	FALSE	FALSE
A*01:01	LVDLGVLSDPGSGLY	15	8	0.783549	Protein	O95424	LSDPGSGLY	27.93	0.047	0.025	TRUE	FALSE	FALSE
A*01:01	LVDLYDTTSNVY	12	1	0.533973	Protein	Q6SJ93;B4E0T6;Q6SJ93-2	LVDTTSNVY	151.73	0.177	0.117	TRUE	FALSE	FALSE
A*01:01	LVDNSIRELQY	11	16	0.941276	Protein	E5RHZ3;Q9Y2G2-3;E5RFV9;E5RFI5;E5RIN1	LVDNSELQY	108.08	0.033	0.091	TRUE	FALSE	FALSE
A*01:01	LVDPSVYGY	9	9	0.826026	Protein	A0A024R8A7;Q96I24	LVDPSVYGY	29.05	0.01	0.027	TRUE	FALSE	FALSE
A*01:01	LVDPWTPHLY	10	15	0.931392	Protein	B3KMS0;B4E0B7;B3KY03;Q15021	LVDPTPHLY	10.82	0.004	0.011	TRUE	FALSE	FALSE
A*01:01	LVDVSQPAY	9	6	0.880955	Protein	A0A0A0MSU3;Q9H9A7	LVDVSQPAY	52.88	0.033	0.05	FALSE	FALSE	FALSE
A*01:01	LVERLQALY	9	1	0.805844	Protein	Q9UMW8;Q3LFD5;Q9UMW8-2;H7BXK0	LVERLQALY	55.63	0.072	0.052	TRUE	FALSE	FALSE
A*01:01	LVEVEGDNRY	10	1	0.522448	Protein	B4DJL0;P04844-2;P04844;B2RE46	LVEEGDNRY	448.27	0.138	0.264	TRUE	FALSE	FALSE
A*01:01	MAELGPLNKY	10	1	0.763398	Protein	A0A024R273;B3KQJ1;A0A024R244;A8K4G2;P43405-2	MAELGPLKY	239.54	0.083	0.168	TRUE	FALSE	FALSE
A*01:01	MCINVLLTY	9	2	0.653301	Non-coding	NR_073107-1	MCINVLLTY	4497.88	1.175	1.351	FALSE	FALSE	FALSE
A*01:01	MIEIAGVKLLY	11	3	0.914374	Protein	Q9UKF6;G5E9W3;Q53F02;Q05BZ5	MIEGVKLLY	552.47	0.335	0.298	TRUE	FALSE	FALSE
A*01:01	MIEPRTLQY	9	11	0.794142	Protein	P62249;M0R3H0;M0R1M5;Q6IPX4	MIEPRTLQY	62.26	0.016	0.058	TRUE	FALSE	FALSE
A*01:01	MRENQQTFESSGF	13	1	0.235811	Protein	A0A1B0GVW6	MRENQQTFF	29043.2	29.379	24.187	FALSE	FALSE	FALSE
A*01:01	MSDSYLPSYY	10	5	0.788422	Protein	S4R3J8;Q9Y5A9;B5BU99;S4R3V3	MSDSYPSYY	3.38	0.005	0.005	TRUE	FALSE	FALSE
A*01:01	MSDVNLKY	8	1	0.826503	Protein	H3BQK9;Q9UPN3;Q9UPN3-4;Q9UPN3-5;Q9UPN3-3	MSD-VNLKY	29.06	0.031	0.027	FALSE	FALSE	FALSE
A*01:01	MSMVANLLY	9	3	0.87722	Protein	A0A384NL22;A0A087WUL2;A0A087WY10;P49720;A0A087WXQ8	MSMVANLLY	14.24	0.098	0.013	FALSE	FALSE	FALSE
A*01:01	MTDPIRILV	9	10	0.848414	Protein	A0A024R8W0;I3L3H2;P38919	MTDPIRILV	88.96	0.17	0.079	TRUE	FALSE	FALSE
A*01:01	MTELLSSGLKNDY	13	1	0.41578	Protein	C9J7E8;B4DG30;C9JWX9;Q9UL63;C9JVL5	MTELLSSGY	66.98	0.41	0.062	TRUE	FALSE	FALSE
A*01:01	MTELYDYPKY	10	10	0.941929	Protein	B2RAH7;P48147;Q9UM02	MTELYDYKY	17.09	0.082	0.015	TRUE	FALSE	FALSE
A*01:01	MTHNLLLNY	9	4	0.840993	Protein	B5BU61;E5RFP9;E5RGV4;Q6IT96;B4DSK9	MTHNLLLNY	113.49	0.168	0.094	TRUE	FALSE	FALSE
A*01:01	MVDPLLTKY	9	26	0.958694	Protein	Q9H5Z1-2;Q5THR1;B4DL08;Q9H5Z1	MVDPLLTKY	25.64	0.005	0.022	TRUE	FALSE	FALSE
A*01:01	NAEAYVLFY	9	2	0.802388	Protein	Q9Y417;H0YCV3;Q8TEY7;Q8TEY7-2;H0YD08	NAEAYVLFY	26.76	0.059	0.024	FALSE	FALSE	FALSE
A*01:01	NAFEESKDNTIPLLY	15	1	0.806005	Protein	I3L269;I3NI25;Q96NB1;I3L0U4	NAFEEPLLY	2465.18	1.186	0.876	TRUE	FALSE	FALSE
A*01:01	NIDGFLGPWAKY	12	4	0.904766	Protein	Q59H56;H0UI46;Q53H60;O60508;Q2TA76	NIDGPWAKY	976.42	0.525	0.457	TRUE	FALSE	FALSE
A*01:01	NIDIPEGNWY	10	5	0.658452	Protein	B2RWP5;Q9H6B5;Q96L73-3;Q96L73-2;Q96DQ7	NIDPEGNWY	522.86	0.148	0.289	FALSE	FALSE	FALSE
A*01:01	NIDLVSKLLY	10	3	0.85996	Protein	A8K545;B4DRL9;P24386;P26374	NIDVSKLLY	35.02	0.071	0.034	TRUE	FALSE	FALSE
A*01:01	NIDNFLNRY	9	4	0.928241	Protein	A0A2P9DU05;O75116;D6REE7	NIDNFLNRY	69.41	0.044	0.064	FALSE	FALSE	FALSE
A*01:01	NIDNFLSRY	9	16	0.932263	Protein	A0A0U1RQV4;D9ZGF8;Q13464	NIDNFLSRY	55.92	0.042	0.053	TRUE	FALSE	FALSE
A*01:01	NIDYPVLY	8	11	0.84538	Protein	B3KMR4;Q53H55;Q8N2W9	NID-YPVLY	928.12	0.217	0.441	TRUE	FALSE	FALSE
A*01:01	NIEAAKDLLY	10	3	0.724303	Protein	Q6P5V6;A0A087WUY5;Q53FH8;B7Z476;Q9Y5X3	NIEAADLLY	171.44	0.167	0.129	TRUE	FALSE	FALSE
A*01:01	NLDAVHDITVAY	12	18	0.736261	Protein	Q6UWP7-3;Q6UWP7;B4DYR5;B4DM26;B4DLE7	NLDDITVAY	285.74	0.196	0.19	TRUE	FALSE	FALSE
A*01:01	NLDFQMEQY	9	8	0.882688	Protein	A0A024R7P5;Q96RS2;P08865;F8WD59;A0A0C4DG17	NLDFQMEQY	56.43	0.033	0.053	TRUE	FALSE	FALSE
A*01:01	NLDIERPTY	9	6	0.922195	Protein	A8JZY9;P68366;Q71U36;P0DPH7-2;C9JDS9	NLDIERPTY	478.11	0.09	0.275	TRUE	FALSE	FALSE
A*01:01	NLDIIQQEY	9	6	0.82871	Protein	Q8IWA0;A8K330	NLDIIQQEY	51.24	0.013	0.049	TRUE	FALSE	FALSE
A*01:01	NLDNLIQQY	9	2	0.73376	Protein	H0UI11;Q5JWR5;B2RWN9;Q5TA12;H0UI10	NLDNLIQQY	92.01	0.017	0.081	FALSE	FALSE	FALSE
A*01:01	NLDPEIDEKLLY	12	16	0.9065	Protein	Q53FG6;B3KUJ0;Q15427;Q5SZ64	NLDPEILLY	102.45	0.041	0.087	TRUE	FALSE	FALSE
A*01:01	NLDPLTETY	9	7	0.895902	Protein	P61599;P61599-2;A8MZB2	NLDPLTETY	53.9	0.009	0.051	TRUE	FALSE	FALSE
A*01:01	NLDPSNVDSLFY	12	1	0.578168	Protein	Q5JYR7;B2RE46;P04844	NLDPSSLFY	33.55	0.032	0.033	TRUE	FALSE	FALSE
A*01:01	NLDQATRVAY	10	5	0.663115	Protein	E9PD53;Q9NTJ3-2;Q9NTJ3;B3KVJ5;B3KXX5	NLDQATVAY	283.96	0.124	0.189	TRUE	FALSE	FALSE
A*01:01	NLEEGKLAFY	10	1	0.537011	Protein	B3KV69;Q8IUD6	NLEEGKLFY	443.99	0.152	0.263	TRUE	FALSE	FALSE
A*01:01	NLEELPLNEY	10	1	0.798559	Protein	Q9BRQ8-2;Q9BRQ8	NLEELPLEY	479.34	0.115	0.275	FALSE	FALSE	FALSE
A*01:01	NNALGDLVLY	10	6	0.807906	Protein	Q7Z7M0;Q7Z7M0-2	NNALGDLLY	1844.04	0.89	0.709	FALSE	FALSE	FALSE
A*01:01	NSAIIYDRDFSYNY	14	13	0.723413	Protein	B4DNN4;B4E0I8;Q53GZ5;P23921	NSADFSYNY	1754.18	1.595	0.684	TRUE	FALSE	FALSE
A*01:01	NSDLNNLLF	9	6	0.822692	Protein	O94955;A0A024RAM7	NSDLNNLLF	39.94	0.089	0.038	TRUE	FALSE	FALSE
A*01:01	NSDPNINQFFKY	12	6	0.917133	Protein	U3L3J4;A0A342YEM4;H9E7Y3;A0A1J0QVE1;A0A023QTY8	NSDPNINQY	48.4	0.03	0.046	TRUE	FALSE	FALSE
A*01:01	NSDTNIRWNNY	11	1	0.317493	Protein	O43422-2;A0A140VJQ7;O43422;B4DS64;Q2YDB3	NSDTNINNY	296.71	0.106	0.195	TRUE	FALSE	FALSE
A*01:01	NSDVSLLNY	9	26	0.905459	Protein	B4DZ33;A0A024R0H9;Q86Z02-2;Q86Z02-4;J3KP92	NSDVSLLNY	7.21	0.004	0.009	TRUE	FALSE	FALSE
A*01:01	NSDWHLVNY	9	2	0.839463	Protein	A0A088AWN3;Q9BZ29-3;Q9BZ29-5;A0A0A0MSY4;A0A0D9SFH5	NSDWHLVNY	14.85	0.015	0.014	TRUE	FALSE	FALSE
A*01:01	NSDYLALLQAY	11	6	0.867238	Protein	H7BZ23;Q6P158;H7C109;Q59G60	NSDYLALLY	11.49	0.052	0.011	TRUE	FALSE	FALSE
A*01:01	NSELEQQLGATGAY	14	10	0.789694	Protein	H3BU23;Q01850	NSELEQQLY	311	0.224	0.202	TRUE	FALSE	FALSE
A*01:01	NSESGYILFY	10	3	0.855113	Protein	P62068-3;H7BZK6;P62068;O75317;P62068-4	NSESGILFY	12.38	0.02	0.012	TRUE	FALSE	FALSE
A*01:01	NSETDSFKLAY	11	1	0.383467	Protein	Q9UMZ2-8;Q9UMZ2-5;Q9UMZ2-7;Q9UMZ2-3;Q9UMZ2-9	NTDSFKLAY	33.06	0.034	0.032	FALSE	FALSE	FALSE
A*01:01	NSEVTVQPSPYLSY	14	3	0.733667	Protein	X6RA30;O75794	NSESPYLSY	342.39	0.348	0.219	TRUE	FALSE	FALSE
A*01:01	NSLFLTDLY	9	4	0.930342	Protein	E7ES33;J3QRT6;Q16181-2;B4DPQ6;O43236-3	NSLFLTDLY	69.65	0.184	0.064	TRUE	FALSE	FALSE
A*01:01	NSYPRFLESEFY	12	3	0.60132	Protein	P41220-3;A0A024R939;P41220-4;P41220;P41220-2	NSYPESEFY	515.87	0.34	0.287	TRUE	FALSE	FALSE
A*01:01	NTDFWKTLRY	10	4	0.950699	Protein	B4E2S2;Q9UKK3	NTDFKTLRY	4.73	0.006	0.007	TRUE	FALSE	FALSE
A*01:01	NTDFYQTSY	9	1	0.825502	Protein	B3KW34;Q969M3-3;Q969M3	NTDFYQTSY	4.77	0.003	0.007	TRUE	FALSE	FALSE
A*01:01	NTDGFLLPKY	10	9	0.949915	Protein	Q86TN4-2;Q86TN4-4;F5H1K3;H0YGY9;Q86TN4	NTDGFLLKY	9.01	0.016	0.01	TRUE	FALSE	FALSE
A*01:01	NTDHLTTVLY	10	1	0.556138	Protein	Q96EF9;Q96K31;A0A0X1KG80	NTDHTTVLY	4.7	0.003	0.007	TRUE	FALSE	FALSE
A*01:01	NTDHQTQLLY	10	8	0.612364	Protein	Q06609-2;Q06609;Q06609-4;Q5U0A5;Q06609-3	NTDHQTLLY	3.58	0.001	0.006	TRUE	FALSE	FALSE
A*01:01	NTDLVFGQY	9	7	0.836689	Protein	P12694-2;Q6ZSA3;B2R8A9;H0YH31;A0A0M4C4P8	NTDLVFGQY	7.21	0.006	0.009	FALSE	FALSE	FALSE
A*01:01	NTDPWAGYRY	10	11	0.863319	Protein	P53582;Q5CZ91	NTDPAGYRY	6.91	0.003	0.008	TRUE	FALSE	FALSE
A*01:01	NTDRQWLIDTLY	12	7	0.62126	Protein	A0A024R201;B4DJ66;E9PL38;J3KNQ3;A0A087WUL9	NTDRQDTLY	9.25	0.014	0.01	TRUE	FALSE	FALSE
A*01:01	NTDSLDWALY	10	6	0.881284	Protein	I3L3B0;A8K651;Q07021;I3L3Q7	NTDSLDALY	4.6	0.008	0.007	FALSE	FALSE	FALSE
A*01:01	NTDSPLRY	8	26	0.966174	Protein	A0A024R7P5;A0A024R2P0;P08865;C9J9K3;A0A0C4DG17	NTD-SPLRY	53.63	0.018	0.051	TRUE	FALSE	FALSE
A*01:01	NTDSPLRYV	9	4	0.77136	Protein	A0A024R7P5;P08865;A0A0C4DG17;A0A024R2P0;C9J9K3	NTDSPLRYV	1790.09	0.582	0.693	TRUE	FALSE	FALSE
A*01:01	NTEAFYKISTLY	12	2	0.671294	Protein	Q13217;A8KA82;X6R9L0	NTEKISTLY	25.98	0.057	0.022	TRUE	FALSE	FALSE
A*01:01	NTEAFYKISTLYY	13	1	0.531336	Protein	Q13217;A8KA82;X6R9L0	NTEASTLYY	15.91	0.071	0.015	TRUE	FALSE	FALSE
A*01:01	NTEEAANTMVNYY	13	2	0.672635	Protein	Q59H49;K7ES59;P26599-2;A6NLN1;A0A0U1RRM4	NTEEAANYY	87.57	0.083	0.078	TRUE	FALSE	FALSE
A*01:01	NTEEEGLKY	9	1	0.871114	Protein	E9PK09;Q9NYF8-2;Q9NYF8;E9PKI6;A0A1W2PQ43	NTEEEGLKY	16.18	0.004	0.015	TRUE	FALSE	FALSE
A*01:01	NTEEFITVY	9	1	0.871759	Protein	H0Y9T0;Q96BN8	NTEEFITVY	25.47	0.016	0.021	TRUE	FALSE	FALSE
A*01:01	NTEGINLPELFKY	13	15	0.96381	Protein	B7Z8X7;Q9H6T2;B7Z284;B9ZVN9;Q53T12	NTEGINLKY	103.34	0.1	0.088	TRUE	FALSE	FALSE
A*01:01	NTEVLLSHLSY	11	14	0.873186	Protein	A0A024R3K4;Q01543;Q01543-2;A0A024R3M5;A0A024R3N6	NTELSHLSY	88.35	0.062	0.078	TRUE	FALSE	FALSE
A*01:01	NTISTGLLY	9	4	0.90519	Protein	A8MTP4;Q99590;F8W6K1;B4DZM2;A8MUK0	NTISTGLLY	53.75	0.062	0.051	TRUE	FALSE	FALSE
A*01:01	NTQPIPILY	9	18	0.94979	Protein	A0A2R8YET2;A0A2R8Y7F4;Q9Y520;H7C5N8;Q9Y520-5	NTQPIPILY	49.38	0.013	0.047	TRUE	FALSE	FALSE
A*01:01	NTSPLLGDARF	11	4	0.778205	Protein	B4DHF7;Q5HYH0;B4E302;O75410-3;O75410	NTSPGDARF	16386.4	3.286	6.276	TRUE	FALSE	FALSE
A*01:01	NVDAILEEY	9	5	0.881533	Protein	B3KX14;A0A0A0MT59;Q5JXX2;B4DXQ8;Q53EY5	NVDAILEEY	48.66	0.028	0.046	TRUE	FALSE	FALSE
A*01:01	NVDESLLGY	9	1	0.625538	Protein	A0A0B4J216;Q6IA69-2;Q6IA69	NVDESLLGY	27.51	0.014	0.025	TRUE	FALSE	FALSE
A*01:01	NVDFDAPLGY	10	3	0.696839	Protein	Q541A5;Q92890-1;Q92890-3;C9JNP9;Q92890	NVDDAPLGY	53.47	0.04	0.05	FALSE	FALSE	FALSE
A*01:01	NVDLLGSLADLY	12	12	0.914297	Protein	Q2M2R1;A8KAQ7;Q4KMX6;Q9UJX3-2;A5D8X2	NVDSLADLY	96.22	0.163	0.083	TRUE	FALSE	FALSE
A*01:01	NVDLVVSAY	9	1	0.642765	Protein	K7ESK5;Q96MN2-2;Q96MN2-3;B2RCA1;Q96MN2	NVDLVVSAY	107.71	0.057	0.09	FALSE	FALSE	FALSE
A*01:01	NVDTESALLY	10	1	0.493359	Protein	E7EP60;Q6PJE7;B4E0Q2;P13612-2;P13612	NVDESALLY	14.17	0.01	0.013	TRUE	FALSE	FALSE
A*01:01	PLDQTPLFY	9	1	0.637648	Protein	O60337-6;A0A0B4J206;O60337-5;O60337;B2RBJ1	PLDQTPLFY	32.6	0.032	0.032	TRUE	FALSE	FALSE
A*01:01	PLFGLFLIIY	10	3	0.655749	Protein	Q8NGG5;A0A126GVZ6	PLFGLFLIY	13038.6	7.27	4.402	FALSE	FALSE	FALSE
A*01:01	PPYTVVYFPVR	11	6	0.940672	Protein	Q5D6A5;A8MX94;A0A2R8Y5E5;P09211;V9HWE9	PPYTVVPVR	39975.6	86.429	71.693	TRUE	FALSE	FALSE
A*01:01	PPYTVVYFPVRG	12	2	0.787198	Protein	Q5D6A5;A8MX94;V9HWE9;P09211	PPYTVPVRG	38238.1	98.571	62.048	TRUE	FALSE	FALSE
A*01:01	PPYTVVYFPVRGR	13	1	0.641477	Protein	Q5D6A5;A8MX94;V9HWE9;P09211	PPYTPVRGR	40031.4	95	72.005	TRUE	FALSE	FALSE
A*01:01	PSMTGLPLSALPPP	14	1	0.735173	Protein	Q9H8N7	PSMTGLPLP	39929.8	97.857	71.437	FALSE	FALSE	FALSE
A*01:01	PTAVVPLRY	9	10	0.599571	Protein	Q9UIQ6-2;B2RAK1;Q9UIQ6-3;Q9UIQ6	PTAVVPLRY	98.07	0.087	0.085	TRUE	FALSE	FALSE
A*01:01	PTDPDPIRGFGSY	13	4	0.313347	Protein	Q9UKK3	PTDPDPISY	146.34	0.074	0.114	TRUE	FALSE	FALSE
A*01:01	PTDVLKIVY	9	1	0.833458	Protein	Q6P179;B2R769;Q6P179-3	PTDVLKIVY	34.64	0.035	0.034	TRUE	FALSE	FALSE
A*01:01	PVEEFNELLSKY	12	26	0.906189	Protein	Q14494-2;B4DYE1;J9JIE5;F5H1B7;B4DGE5	PVEEFNELY	2831.45	0.851	0.97	TRUE	FALSE	FALSE
A*01:01	QADIARMLY	9	4	0.573289	Protein	Q15326-4;Q15326-2;A0A0A0MRY2;Q5UGI2;Q5BJG6	QADIARMLY	18.49	0.015	0.016	TRUE	FALSE	FALSE
A*01:01	QADLINELY	9	2	0.745969	Protein	Q96K76;B3KRV9;Q96K76-4;Q96K76-2	QADLINELY	24.71	0.01	0.02	TRUE	FALSE	FALSE
A*01:01	QAEILLSNHY	10	6	0.857776	Protein	Q8TEM1	QAELLSNHY	2119.72	0.299	0.789	TRUE	FALSE	FALSE
A*01:01	QIDEIKDPSGLFY	13	5	0.776217	Protein	Q9P0A0;F8W057;F8VRL1;F8VP72;F8W0Q1	QIDPSGLFY	102.09	0.058	0.087	TRUE	FALSE	FALSE
A*01:01	QIENIEEDFR	10	1	0.476696	Protein	Q08043;B2R8Y4;P12814-3;P12814-4;A0A024R694	QIENIEDFR	29927.1	14.951	26.653	FALSE	FALSE	FALSE
A*01:01	QLDAELLRY	9	8	0.957662	Protein	Q3B726	QLDAELLRY	36.37	0.011	0.035	TRUE	FALSE	FALSE
A*01:01	QLDLAQRTLY	10	7	0.690501	Protein	M0QZJ4;Q7Z398;B7ZAY1;O43296;M0R0U7	QLDLAQTLY	85.34	0.052	0.076	TRUE	FALSE	FALSE
A*01:01	QLDPIYVAY	9	1	0.603883	Protein	Q9Y2E4;E7EPU2;A0A0U1RQW6;Q9P265;Q14689-6	QLDPIYVAY	103.78	0.018	0.088	FALSE	FALSE	FALSE
A*01:01	QLDSAVKNLY	10	1	0.879997	Protein	Q9UL58;Q9UL58-2	QLDSAVNLY	110.54	0.043	0.092	TRUE	FALSE	FALSE
A*01:01	QLDTRVSEFY	10	1	0.487258	Protein	B4DRF1;B3KM43;O95671-2;O95671;B4DN81	QLDTVSEFY	59.94	0.041	0.056	TRUE	FALSE	FALSE
A*01:01	QLDVAGRVMQY	11	14	0.654663	Protein	Q6VY07-2;Q6VY07;A0A024R5H6;B4DF77	QLDVAGMQY	585.87	0.08	0.313	TRUE	FALSE	FALSE
A*01:01	QLEDGRTLSDY	11	1	0.546196	Protein	Q49A90;F5H388;Q8WYN9;Q3MIH3;P62979	QLEDGRTLY	2047.56	0.182	0.769	TRUE	FALSE	FALSE
A*01:01	QLEDLDSRVLYY	12	1	0.30621	Protein	P26358;P26358-2;Q59FP7;I6L9H2;A0A024R7E3	QLEDLDLYY	145.46	0.121	0.114	TRUE	FALSE	FALSE
A*01:01	QLEWDDSTLSY	11	6	0.89184	Protein	O94985;B3KPV2;B4E3Q1;Q5SR54;B3KMD3	QLDDSTLSY	164.74	0.024	0.124	TRUE	FALSE	FALSE
A*01:01	QLQAEVLRY	9	1	0.754482	Protein	Q96AA8-2;Q96AA8-4;Q96AA8-3;Q96AA8	QLQAEVLRY	1852.2	0.231	0.712	FALSE	FALSE	FALSE
A*01:01	QSDIVSTMEHY	11	11	0.942311	Protein	Q9H668	QSDSTMEHY	87.56	0.023	0.078	TRUE	FALSE	FALSE
A*01:01	QSDPWQQELY	10	1	0.560993	Protein	P49748-2;B4DEA8;B3KPA6;Q53HR2;B3KPX1	QSDPWQQLY	9.62	0.002	0.01	FALSE	FALSE	FALSE
A*01:01	QSDYFRALY	9	1	0.448161	Protein	Q9P2K6;F5H523;B2RNT7	QSDYFRALY	5.46	0.007	0.007	TRUE	FALSE	FALSE
A*01:01	QSELQSQVRY	10	1	0.678278	Protein	Q14847-2;B4DIC4;Q14847;A0A024R1S8;B4DJI4	QSEQSQVRY	128.78	0.035	0.104	TRUE	FALSE	FALSE
A*01:01	QSELVGQLY	9	3	0.738456	Protein	O00429-5;O00429-8;O00429-7;O00429-3;O00429-2	QSELVGQLY	22.66	0.007	0.019	TRUE	FALSE	FALSE
A*01:01	QSEPDGFSHFHLY	13	1	0.689668	Protein	B4DWA9;B3KP29;Q8WUA7-2;A0A0A0MRY0;B2RE30	QSEPDGHLY	82.71	0.029	0.074	TRUE	FALSE	FALSE
A*01:01	QTDHLFFKY	9	1	0.706692	Protein	A0AV88;A0A024R5U5;O14672	QTDHLFFKY	6.27	0.003	0.008	TRUE	FALSE	FALSE
A*01:01	QTDINLPY	8	4	0.787136	Protein	V9HW84;H0YBG6;B7Z1V7;A0A384P5G6;P38646	QTD-INLPY	66.7	0.085	0.062	FALSE	FALSE	FALSE
A*01:01	QTDIQGALSAY	11	7	0.724069	Protein	Q6PD62;A8K6X9	QTDIQGALY	24.03	0.011	0.02	TRUE	FALSE	FALSE
A*01:01	QTDNLELKKLVY	12	3	0.922257	Protein	A0A087WYD1;C9J1E7;Q68DI0;K7EJX1;P63010-2	QTDNLELKY	19.69	0.018	0.017	TRUE	FALSE	FALSE
A*01:01	QTDPTLLSV	9	2	0.814076	Protein	Q549N5;Q9Y5M8;C9J5Z8	QTDPTLLSV	242.69	0.152	0.17	TRUE	FALSE	FALSE
A*01:01	QTELENQLEY	10	1	0.582791	Protein	G3V1Q8;Q9H2K8;B3KPH9;A8K0J3	QTEENQLEY	21.84	0.008	0.018	TRUE	FALSE	FALSE
A*01:01	QTENLGVVYY	10	3	0.553776	Protein	A0A024RDI9;Q8TBM8-2;Q8TBM8	QTENGVVYY	48.03	0.031	0.046	TRUE	FALSE	FALSE
A*01:01	QTESQQIRYF	10	3	0.718459	Protein	A0A2R8YDN7;A0A2R8Y635;Q9H7F0	QTESQQIRY	1411.58	0.334	0.585	TRUE	FALSE	FALSE
A*01:01	QTPIVPLLY	9	9	0.859592	Protein	A8K8W4;Q5TDH4;Q5TDG9;Q9Y2G8	QTPIVPLLY	151.02	0.065	0.117	TRUE	FALSE	FALSE
A*01:01	QTTPLIEYY	9	1	0.67602	Protein	P54819;P54819-5;F8VY04;P54819-2;P54819-6	QTTPLIEYY	283.83	0.06	0.189	FALSE	FALSE	FALSE
A*01:01	QVDFSPDMSY	10	1	0.686194	Protein	O60508;Q53H60	QVDSPDMSY	52.47	0.03	0.05	TRUE	FALSE	FALSE
A*01:01	QVDNSLITKY	10	3	0.871496	Protein	Q5THK1;Q5THK1-3;Q5THK1-2;Q5THK1-4	QVDNSITKY	291.96	0.048	0.193	TRUE	FALSE	FALSE
A*01:01	QVDPLSALKY	10	40	0.941556	Protein	Q9UL63;Q9UL63-2;C9J7E8;B4DG30;Q7Z3T0	QVDPSALKY	44.1	0.008	0.042	TRUE	FALSE	FALSE
A*01:01	QVDPNYAYAY	10	1	0.64506	Protein	B4DL80;P30260-2;P30260;G5EA36	QVDPNAYAY	70.59	0.036	0.065	TRUE	FALSE	FALSE
A*01:01	RADPEAGLLLY	11	26	0.747858	Non-coding	NR_102264-7;NR_102264-8;NR_102264-1;NR_102264-10;NR_102264-5	RADPEALLY	113.23	0.026	0.094	TRUE	FALSE	FALSE
A*01:01	RADQELLMY	9	1	0.573559	Protein	Q6FHM2;E7EP32;P62879;P62879-2	RADQELLMY	56.35	0.017	0.053	TRUE	FALSE	FALSE
A*01:01	RIDLIPSLY	9	28	0.801995	Protein	B4DP20;B7Z5I6;Q99567;J3KMX1	RIDLIPSLY	50.99	0.031	0.048	TRUE	FALSE	FALSE
A*01:01	RIEEGTYGVVY	11	1	0.633162	Protein	A0A0D9SER5;B4E0M9;P21127-3;B4E0N4;P21127-2	RIEEGTYVY	4243.07	0.367	1.283	TRUE	FALSE	FALSE
A*01:01	RLDAVTLLY	9	13	0.67388	Protein	Q6ICL7	RLDAVTLLY	10.08	0.01	0.01	TRUE	FALSE	FALSE
A*01:01	RLDINTNTY	9	2	0.684393	Protein	D6REA1;A0A0S2Z6B4;A0A0S2Z5K6;D6RIU8;Q9H173	RLDINTNTY	160.29	0.051	0.122	TRUE	FALSE	FALSE
A*01:01	RLDSLTTLY	9	1	0.714852	Protein	X6RI37;Q9UQ13-2;Q9UQ13	RLDSLTTLY	17.73	0.013	0.016	TRUE	FALSE	FALSE
A*01:01	RLDTPLYFSY	10	10	0.782201	Protein	Q32P28-3;Q32P28;Q68CW0;B4DNM8;Q32P28-4	RLDTPLYFY	142.23	0.104	0.112	TRUE	FALSE	FALSE
A*01:01	RLEIEPEWAY	10	26	0.842104	Protein	Q00688;Q53GD8	RLEEPEWAY	2256.52	0.328	0.825	TRUE	FALSE	FALSE
A*01:01	RLETELDGLRY	11	6	0.865713	Protein	P46952-2;C9IY88;P46952	RTELDGLRY	275.64	0.073	0.185	FALSE	FALSE	FALSE
A*01:01	RPPGFSPFR	9	2	0.950956	Protein	P01042-3;P01042-2;P01042;B4DPP8;D3DNU8	RPPGFSPFR	35608.5	11.817	48.597	TRUE	TRUE	FALSE
A*01:01	RSDDIYNQVSAY	12	1	0.443539	Protein	Q12768;E7EQI7;B4DLF2;E5RFU6;Q53EL1	RSDDQVSAY	109.72	0.047	0.092	TRUE	FALSE	FALSE
A*01:01	RSDFFTSFY	9	2	0.608112	Protein	A0A024R6M3;A0A0C4DGK1;B4DHB8;G3XAH6;B4DYF4	RSDFFTSFY	4.56	0.009	0.007	TRUE	FALSE	FALSE
A*01:01	RSDSYVELSQY	11	2	0.523823	Protein	P52298;P52298-3;F8WE41;Q7Z3W9	RSDSELSQY	95.91	0.051	0.083	TRUE	FALSE	FALSE
A*01:01	RSDVEILGY	9	1	0.667895	Protein	Q86Y07;Q86Y07-5;Q86Y07-2;B7Z2X1;Q05CR6	RSDVEILGY	23.07	0.017	0.019	TRUE	FALSE	FALSE
A*01:01	RSEAPNWATQDSGFY	15	4	0.734494	Protein	H0YAW4;B2R806;B3KW56;Q6IAX5;E5RGA2	RSEAPSGFY	536.42	0.555	0.293	TRUE	FALSE	FALSE
A*01:01	RSEFQLGESVKY	12	2	0.720308	Protein	Q03113-2;Q03113	RSEGESVKY	686.81	0.227	0.354	TRUE	FALSE	FALSE
A*01:01	RSQLDISDPYKVY	13	5	0.721623	Protein	Q15306-2;F2Z3D5;Q15306;Q99419	RSSDPYKVY	6194.66	1.65	1.812	TRUE	FALSE	FALSE
A*01:01	RTDPIPIVV	9	3	0.693067	Protein	K7EKU0;Q9UKJ3	RTDPIPIVV	802.24	0.245	0.395	TRUE	FALSE	FALSE
A*01:01	RTDSSISNLMDY	12	4	0.478861	Protein	B7ZAR7;Q9H992-2;Q9H992	RTDSSISNY	55.02	0.075	0.052	TRUE	FALSE	FALSE
A*01:01	RTEIIEDLAFY	11	14	0.68899	Protein	A0A024R794;Q9Y5L0-3;B2R6H7;C9J7E5;Q9Y5L0-5	RTEEDLAFY	162.38	0.085	0.123	TRUE	FALSE	FALSE
A*01:01	RTELPQFVSY	10	9	0.698158	Protein	Q14166;A0A024R4U3	RTEPQFVSY	133.58	0.049	0.107	TRUE	FALSE	FALSE
A*01:01	RTEPFQDGY	9	3	0.726754	Protein	Q75MK4;Q9UEE5;A0A024RA53	RTEPFQDGY	37.16	0.019	0.036	TRUE	FALSE	FALSE
A*01:01	RVDDIFSDLY	10	1	0.60055	Protein	A1L3Z9;Q9NXG9;Q2TAL8	RVDDISDLY	21.75	0.02	0.018	FALSE	FALSE	FALSE
A*01:01	RVDFQGMEY	9	1	0.632433	Protein	P62495;B7Z7P8;P62495-2	RVDFQGMEY	24.07	0.015	0.02	TRUE	FALSE	FALSE
A*01:01	RVDPIGPLSY	10	16	0.764332	Protein	Q8TDJ6-2;A0A024R5V2;Q8TDJ6-3;Q8TDJ6	RVDPGPLSY	82.98	0.014	0.074	TRUE	FALSE	FALSE
A*01:01	RVDVFTNLGY	10	2	0.667563	Protein	Q86W42-3;Q86W42;Q86W42-2	RVDVFTNLY	40.46	0.08	0.039	TRUE	FALSE	FALSE
A*01:01	RVEDGPSEFALY	12	1	0.654103	Protein	Q9H2L5-3;Q59FL4;V9GYK1;Q9H2L5-2;Q9H2L5	RVEDGPSLY	710.61	0.136	0.363	TRUE	FALSE	FALSE
A*01:01	RVEIQNLTY	9	1	0.707206	Protein	Q9Y616-2;Q9Y616;B2RA52	RVEIQNLTY	307.99	0.077	0.201	FALSE	FALSE	FALSE
A*01:01	SADLVALSY	9	2	0.718114	Protein	B4E206;B4E3T7;Q8WUM0	SADLVALSY	18.42	0.008	0.016	TRUE	FALSE	FALSE
A*01:01	SADQVALVY	9	9	0.692567	Protein	Q53F36;O14836;O14836-2;E7ER05;B4E0B0	SADQVALVY	23.83	0.008	0.02	TRUE	FALSE	FALSE
A*01:01	SADSLLSPQP	10	1	0.738267	Protein	H0Y326;Q7Z3K4;Q5BKU8;Q8NF91-4;Q8NF91-9	SADSLSPQP	27986.9	16.426	21.456	FALSE	FALSE	FALSE
A*01:01	SADVPLVVEY	10	8	0.75218	Protein	P12004;Q6FHF5;Q6FI35	SADPLVVEY	247.89	0.053	0.172	TRUE	FALSE	FALSE
A*01:01	SLDFAINHY	9	1	0.839568	Protein	Q7RTP6-2;Q7RTP6-3;Q7RTP6;Q7RTP6-5;Q7RTP6-4	SLDFAINHY	87.86	0.034	0.078	FALSE	FALSE	FALSE
A*01:01	SLDVGGPLRY	10	9	0.73035	Protein	F5GXM0;Q9NR77;F5H4N4;F5GZF7	SLDGGPLRY	53.34	0.019	0.05	TRUE	FALSE	FALSE
A*01:01	SLESLTLSY	9	1	0.768789	Protein	B4DK79;Q53F69;Q562F1;A0A0C4DH00;A0A087X0S7	SLESLTLSY	74.19	0.039	0.068	TRUE	FALSE	FALSE
A*01:01	SPEYVNLPINGNGKQ	15	1	0.694137	Protein	A8MX94;V9HWE9;P09211	SPEYVNLKQ	41663.4	78.636	80.953	TRUE	FALSE	FALSE
A*01:01	SSDEVNFLVY	10	1	0.80474	Protein	Q9BZK7;A0A068L529;C9J903;A0A0D9SF63;A0A0D9SEW5	SSDEVNFLY	6.13	0.005	0.008	TRUE	FALSE	FALSE
A*01:01	SSDFDPLVY	9	2	0.750854	Protein	Q68DV7-2;Q68DV7;Q68DV7-3;Q68DV7-4;J3KSE3	SSDFDPLVY	9.2	0.004	0.01	TRUE	FALSE	FALSE
A*01:01	SSDFLEFVNY	10	2	0.91058	Protein	B7Z3H5;Q68E08;B7Z3R0;B7Z9V1;B7Z8K9	SSDLEFVNY	14.08	0.051	0.013	TRUE	FALSE	FALSE
A*01:01	SSDGAISLLTY	11	9	0.85549	Protein	P55735;Q59FA6;P55735-2;A8MXL6;P55735-4	SSDGAISLY	32.3	0.01	0.031	TRUE	FALSE	FALSE
A*01:01	SSDNIMVQY	9	3	0.816591	Protein	Q9UBF2-2;Q9Y678;Q8WUI6;A0A140VK12;Q9UBF2	SSDNIMVQY	11.76	0.004	0.012	TRUE	FALSE	FALSE
A*01:01	SSDPAILASWDY	12	1	0.654731	Protein	Q5QPJ9;Q5QPK2;H0Y368	SSDPAILAY	26.61	0.021	0.023	FALSE	FALSE	FALSE
A*01:01	SSDSTIDILY	10	4	0.706043	Protein	Q9NR09;Q9H8B7;A0A3B3IUB9	SSDSTDILY	7.23	0.005	0.009	FALSE	FALSE	FALSE
A*01:01	SSDTADFRDLY	11	2	0.707971	Protein	P81408;P81408-2;P81408-4;Q9BRF4;P81408-3	SSDTADFLY	15.91	0.012	0.015	TRUE	FALSE	FALSE
A*01:01	SSDVIRLIMQY	11	1	0.822821	Protein	A0MNN4;Q2TAY7	SSDVIRLQY	87.49	0.065	0.078	TRUE	FALSE	FALSE
A*01:01	SSDVLVFDY	9	10	0.81106	Protein	Q09028-4;H0YF10;Q16576-2;Q16576;Q5JP01	SSDVLVFDY	9.44	0.029	0.01	TRUE	FALSE	FALSE
A*01:01	SSDYSIFDNY	10	1	0.674839	Protein	J3KRD0;Q86W34;J3KTM1;A0A024R8K0;Q86W34-5	SSDSIFDNY	13.87	0.036	0.013	TRUE	FALSE	FALSE
A*01:01	SSDYVEIHY	9	6	0.91163	Protein	O75077-2;O75077;Q53TK5;O75077-3;B4DL48	SSDYVEIHY	14.64	0.004	0.014	TRUE	FALSE	FALSE
A*01:01	SSEDSEKVIAGLY	13	2	0.837268	Protein	P78527;P78527-2	SSEDSAGLY	63.01	0.074	0.059	TRUE	FALSE	FALSE
A*01:01	SSEELLSLKY	10	31	0.931798	Protein	P14921-2;B4DW78;Q5U0M2;P14921-5;Q6FG54	SSEELSLKY	28.49	0.016	0.026	TRUE	FALSE	FALSE
A*01:01	SSEELPLYY	9	9	0.866558	Protein	Q96N46-3;C9JBA2;Q86TA5;Q96N46-2;Q96N46	SSEELPLYY	10.11	0.003	0.01	TRUE	FALSE	FALSE
A*01:01	SSELATEVHFY	11	1	0.909005	Protein	B4DPT6;Q9H993;F5GZY1	SSETEVHFY	70.92	0.036	0.065	TRUE	FALSE	FALSE
A*01:01	SSELFTLTY	9	27	0.865	Protein	A0A087WWM0;O43617;A6NKE1	SSELFTLTY	9.56	0.008	0.01	TRUE	FALSE	FALSE
A*01:01	SSEQVVDLLRY	11	14	0.924415	Protein	Q86XN7	SSEQDLLRY	142.42	0.048	0.112	TRUE	FALSE	FALSE
A*01:01	SSEVIKDANLY	11	1	0.570848	Protein	Q15717;M0QZR9;M0R055;Q15717-2	SSEKDANLY	128.08	0.047	0.104	TRUE	FALSE	FALSE
A*01:01	SSEVVTVFQYY	11	9	0.818764	Protein	A0A2R8YEE0;F5GX51;A0A024QZY9;Q9Y4F9;B7Z5J9	SSEVVTQYY	135.76	0.071	0.108	TRUE	FALSE	FALSE
A*01:01	STAPTEPLTHWY	12	5	0.859287	Protein	Q86X55;Q86X55-1	STEPLTHWY	144.68	0.088	0.113	TRUE	FALSE	FALSE
A*01:01	STAVIENPEMLKY	13	4	0.896988	Protein	P54198;P54198-2;A8K194;B4DSW6	STAPEMLKY	346.34	0.174	0.221	TRUE	FALSE	FALSE
A*01:01	STDDPMQFHY	10	1	0.662244	Protein	Q01432;B7Z282;Q01432-4;E9PKC5;Q01432-5	STDDPQFHY	7.36	0.002	0.009	TRUE	FALSE	FALSE
A*01:01	STDHIPILY	9	2	0.69745	Protein	Q06210;Q06210-2	STDHIPILY	3.61	0.001	0.006	TRUE	FALSE	FALSE
A*01:01	STDITERSVLNLY	13	1	0.822238	Protein	Q9Y2L9-3;Q9Y2L9-2;Q9Y2L9;A8KA33;Q8TAR8	STDITENLY	10.47	0.019	0.01	TRUE	FALSE	FALSE
A*01:01	STDKFKTDFY	10	4	0.823746	Protein	E7EM64;B2R514;Q7L5N1	STDKKTDFY	4.93	0.005	0.007	TRUE	FALSE	FALSE
A*01:01	STDMDKVLLKY	11	1	0.627409	Protein	Q5IRN4;A0A0D9SFD0;Q06413-2;B2R681;D6RCM6	STDMDKLKY	23.95	0.008	0.02	FALSE	FALSE	FALSE
A*01:01	STDPSVLGKY	10	3	0.746777	Protein	Q14469;Q8IXV0	STDPSVLKY	9.57	0.001	0.01	TRUE	FALSE	FALSE
A*01:01	STDTSLKIFY	10	1	0.816046	Protein	O43166;O43166-3;F5GYF8;B4DYX7;A6H8W6	STDTSKIFY	7.82	0.006	0.009	TRUE	FALSE	FALSE
A*01:01	STDVNLWY	8	2	0.791106	Protein	Q9Y6J0-2;C9JT60;Q8IVX9;A0A087WWW8;C9J068	STD-VNLWY	42.67	0.067	0.041	FALSE	FALSE	FALSE
A*01:01	STDVSDLLHQY	11	2	0.605883	Protein	A0A140T998;Q5JNW7;X5D2R7;P28062;P28062-2	STDDLLHQY	8.89	0.003	0.009	TRUE	FALSE	FALSE
A*01:01	STDWHVVNY	9	1	0.793233	Protein	Q5JSL3;A6NIW2	STDWHVVNY	9.34	0.005	0.01	TRUE	FALSE	FALSE
A*01:01	STEALSLSY	9	4	0.85922	Protein	B4DJL3;Q9BUE0	STEALSLSY	8.32	0.005	0.009	FALSE	FALSE	FALSE
A*01:01	STEFNPLIY	9	2	0.902691	Protein	Q8WXG6;Q8WXG6-6;Q8WXG6-4;A0A0A0MRB5;Q8WXG6-8	STEFNPLIY	10.5	0.007	0.01	FALSE	FALSE	FALSE
A*01:01	STELAKQVIEY	11	4	0.915375	Protein	P48556;R4GMR5;Q5U0B3;V9HW09	STEKQVIEY	290.78	0.068	0.193	FALSE	FALSE	FALSE
A*01:01	STESMDFLKY	10	5	0.932896	Protein	Q96L67;B1AKJ5;F5H7V1;Q6UUU9;H0Y5G9	STESDFLKY	8.81	0.01	0.009	TRUE	FALSE	FALSE
A*01:01	STEYIPDPERVFY	13	2	0.533581	Protein	B4DES7;B4DH82;Q14690;A0A3B3IUD7	STDPERVFY	30.62	0.031	0.029	TRUE	FALSE	FALSE
A*01:01	STQLPSSPFGDY	12	5	0.702213	Protein	A0PJ74;Q7RU05;Q99595	STQLPSSDY	705.31	0.506	0.361	TRUE	FALSE	FALSE
A*01:01	SVDPHGFISY	10	1	0.582407	Protein	M0R003;A0A024R0M6;Q3ZCQ8;M0R2Q2;M0R1Y4	SVDPHGFSY	45.47	0.01	0.044	TRUE	FALSE	FALSE
A*01:01	SVEEFVERY	9	1	0.786577	Protein	Q6NYC1-2;B2WTI3;B2WTI4;K7EJU9;Q6NYC1	SVEEFVERY	258.23	0.053	0.176	TRUE	FALSE	FALSE
A*01:01	SVLGNLADQLY	11	1	0.524903	Protein	M0R328;Q96HA9-2;Q96HA9	SVNLADQLY	4909.22	0.733	1.466	FALSE	FALSE	FALSE
A*01:01	TADHNLLLY	9	1	0.513297	Protein	J3KNP2;A0JLS5;Q12788;A0A087WYP7	TADHNLLLY	5.85	0.002	0.008	TRUE	FALSE	FALSE
A*01:01	TADTLMGLRY	10	2	0.786964	Protein	Q06210;Q06210-2	TADTLGLRY	26.17	0.033	0.023	TRUE	FALSE	FALSE
A*01:01	TADVHGLYY	9	1	0.609088	Protein	S4R426	TADVHGLYY	7.83	0.003	0.009	FALSE	FALSE	FALSE
A*01:01	TAEEMYDIFGKY	12	1	0.81482	Protein	Q9Y3B4	TAEDIFGKY	2041.37	0.601	0.768	TRUE	FALSE	FALSE
A*01:01	TDVGLLEY	8	1	0.772098	Protein	C9J330;C9JE98;A0A024RBU9;A0A024RBS3;C9JQE8	N/A	80.12	0.077	0.072	FALSE	FALSE	FALSE
A*01:01	TEAAVLLFY	9	1	0.775312	Protein	Q5IWS5;Q8WWU7;Q8WWA0;Q8WWU7-2	TEAAVLLFY	2184.54	0.613	0.807	FALSE	FALSE	FALSE
A*01:01	TIDDFRNQVY	10	6	0.832799	Protein	Q9Y271	TIDDFNQVY	113.41	0.047	0.094	TRUE	FALSE	FALSE
A*01:01	TIDIGVKY	8	1	0.630335	Protein	Q15417-3;E9PDU6;Q15417;Q15417-2	TID-IGVKY	2853.35	0.234	0.975	TRUE	FALSE	FALSE
A*01:01	TIEELLTRY	9	4	0.907568	Protein	Q59GB2;B3KXL8;Q6IAU5;O15355;B4DDC8	TIEELLTRY	450.26	0.079	0.265	FALSE	FALSE	FALSE
A*01:01	TLDAGKFQIY	10	1	0.679064	Protein	O43143;B4E0S6	TLDAGKFQY	130.71	0.057	0.105	TRUE	FALSE	FALSE
A*01:01	TLDENPGVRY	10	4	0.788119	Protein	O00186	TLDEPGVRY	114.31	0.031	0.095	TRUE	FALSE	FALSE
A*01:01	TLDLPHFDEY	10	4	0.467447	Protein	Q5W0Q7;A8K1B1;Q5W0Q7-2	TLDPHFDEY	44.67	0.031	0.043	TRUE	FALSE	FALSE
A*01:01	TLDPYRNEVSQLY	13	3	0.424136	Protein	Q9UKA4	TLDPVSQLY	48.65	0.032	0.046	TRUE	FALSE	FALSE
A*01:01	TLDTKPGLY	9	2	0.540049	Protein	Q8NEG7	TLDTKPGLY	33.07	0.013	0.032	TRUE	FALSE	FALSE
A*01:01	TLEVTSLKY	9	2	0.803521	Protein	Q9BX63-2;Q9BX63;J3QSE8	TLEVTSLKY	91.15	0.034	0.08	FALSE	FALSE	FALSE
A*01:01	TSDAVTFITY	10	3	0.734288	Protein	Q14204	TSDAVTITY	9.01	0.015	0.01	FALSE	FALSE	FALSE
A*01:01	TSDDPWLTAY	10	1	0.81209	Protein	H0YBW4;Q9Y263;E5RIM3	TSDDPWLTY	11.64	0.004	0.011	TRUE	FALSE	FALSE
A*01:01	TSDQATLLLY	10	2	0.530676	Protein	Q7RTS9;Q7RTS9-2;Q9NXS9	TSDQATLLY	4.61	0.003	0.007	TRUE	FALSE	FALSE
A*01:01	TSEAPFLHY	9	12	0.965474	Protein	A0A024R611;H3BRY3;P31146	TSEAPFLHY	35.93	0.007	0.035	FALSE	FALSE	FALSE
A*01:01	TSEDRFIQY	9	1	0.886384	Protein	O60658-6;O60658	TSEDRFIQY	44.29	0.01	0.042	FALSE	FALSE	FALSE
A*01:01	TSELGTLPES	10	1	0.60943	Protein	Q9Y5F7-2;Q9Y5F7;A4FU17	TSELGTLES	11108.3	7.437	3.496	FALSE	FALSE	FALSE
A*01:01	TSELIGQFGVGFY	13	1	0.501045	Protein	P14625;V9HWP2;Q96GW1;Q5CAQ5;Q59FC6	TSELIGQFY	85.09	0.208	0.076	TRUE	FALSE	FALSE
A*01:01	TSEPKPFLYY	10	3	0.772982	Protein	P19838-3;D6RF93;P19838;P19838-2;A0A024RDJ4	TSEPKPLYY	26.99	0.006	0.024	TRUE	FALSE	FALSE
A*01:01	TSEQLDDILKY	11	20	0.966324	Protein	B7Z3V1;Q58I23;P05023-3;B7Z1N5;P05023-4	TSEDDILKY	227.5	0.032	0.163	TRUE	FALSE	FALSE
A*01:01	TSETPDYLLKY	11	42	0.964514	Protein	Q59HG4;V9H027;A8KAP0;U3KQ90;P55199	TSETPDLKY	78.92	0.024	0.071	TRUE	FALSE	FALSE
A*01:01	TSIFDDFSHY	10	5	0.932916	Protein	Q9Y5A9-2;Q9Y5A9;B5BU99	TSFDDFSHY	571.2	0.226	0.306	FALSE	FALSE	FALSE
A*01:01	TTDDWKDFLY	10	11	0.93002	Protein	P09960-3;B4DVZ8;P09960-4;P09960;P09960-2	TTDDKDFLY	4.56	0.002	0.007	TRUE	FALSE	FALSE
A*01:01	TTDFIFNLY	9	10	0.917299	Protein	P08237-3;A0A0S2Z4I1;P08237-2;A0A024R0Y5;Q96I60	TTDFIFNLY	3.42	0.002	0.005	TRUE	FALSE	FALSE
A*01:01	TTDFIYQLY	9	19	0.822563	Protein	B1APP8;Q01813;O14943;Q49A78;Q8WTZ9	TTDFIYQLY	3.3	0.002	0.005	FALSE	FALSE	FALSE
A*01:01	TTDGYLLRL	9	2	0.793338	Protein	E9PFI5;D6RED7;D6R9B6;D6RB09;D6RG13	TTDGYLLRL	241.54	0.235	0.169	TRUE	FALSE	FALSE
A*01:01	TTDLELIKY	9	24	0.964398	Protein	Q13257;Q13257-2;A0A0S2Z414	TTDLELIKY	9.76	0.002	0.01	TRUE	FALSE	FALSE
A*01:01	TTDLFGRDLSY	11	25	0.862963	Protein	P52597;B4DKS8;A0A024R7T3	TTDGRDLSY	11.51	0.007	0.011	TRUE	FALSE	FALSE
A*01:01	TTDLSFLDKY	10	29	0.959969	Protein	A0AVT1-3;A0AVT1;A0AVT1-4;A0A024RDB0	TTDLSFLKY	6.34	0.006	0.008	TRUE	FALSE	FALSE
A*01:01	TTEESLRNYY	10	16	0.867957	Protein	A0A384NL58;P22626-2;P22626;I6L957;A0A087WUI2	TTEESLNYY	31.35	0.015	0.03	TRUE	FALSE	FALSE
A*01:01	TTEFLYNLY	9	7	0.861125	Protein	Q7L2M7;P17858;P17858-2;Q59GI2;B3KNQ7	TTEFLYNLY	8.48	0.014	0.009	FALSE	FALSE	FALSE
A*01:01	TTEILRSMLY	10	4	0.618445	Protein	B4E0N1;O76046;Q96BC0;A0A1U9X8I7;A0A1U9X8I9	TTELRSMLY	10.13	0.031	0.01	TRUE	FALSE	FALSE
A*01:01	TTEIPGGLPSVY	12	4	0.840636	Protein	Q9NVR7;Q9NVR7-2	TTEIPGGLY	79.92	0.05	0.072	FALSE	FALSE	FALSE
A*01:01	TTELVNKDLDIY	12	24	0.919892	Protein	Q92878-2;Q92878;A0A1W2PQ90;Q92878-3	TTEKDLDIY	101.09	0.153	0.086	TRUE	FALSE	FALSE
A*01:01	TTELVNKDLDIYY	13	6	0.895735	Protein	A0A1W2PQ90;Q92878-3;Q92878-2;Q92878	TTEDLDIYY	52.12	0.074	0.049	TRUE	FALSE	FALSE
A*01:01	TTENQYRLTSLY	12	4	0.619262	Protein	C9JKI7;C9JP81;A4D218;Q9Y6D9-3;Q9Y6D9	TTENQTSLY	22.1	0.02	0.019	TRUE	FALSE	FALSE
A*01:01	TTEQILYNIKQEY	13	12	0.907803	Protein	Q53H80;Q9NW35	TTENIKQEY	253.59	0.13	0.174	TRUE	FALSE	FALSE
A*01:01	TTESFEDGLKY	11	2	0.599689	Protein	O75376-2;A0A088AWL3;Q7Z516;A0A024RD47;O75376	TTESDGLKY	46.68	0.011	0.045	TRUE	FALSE	FALSE
A*01:01	TTEVHPELY	9	5	0.941968	Protein	A6PVJ3;A0A0C4DH46;A6PVJ2;H0Y621;Q9Y282-3	TTEVHPELY	7.89	0.002	0.009	TRUE	FALSE	FALSE
A*01:01	TTSHLMGMFY	10	2	0.671665	Protein	P39748;B4DWZ4;Q6FHX6;F5H1Y3	TTSHLGMFY	28.39	0.169	0.026	TRUE	FALSE	FALSE
A*01:01	TVDEHVWFY	9	2	0.738609	Protein	Q8IZY2-2;D6W5Y0;Q8IZY2	TVDEHVWFY	9.01	0.003	0.01	TRUE	FALSE	FALSE
A*01:01	TVDIQNPDITSSRY	14	11	0.861708	Protein	P42768;C9J3B7;A0A024QYX8	TVDIQSSRY	547.13	0.298	0.297	TRUE	FALSE	FALSE
A*01:01	TVDNVQPLLY	10	12	0.865877	Protein	Q9P2G9;B3KY78;Q7Z330	TVDNQPLLY	10.18	0.006	0.01	TRUE	FALSE	FALSE
A*01:01	TVDPASLWEY	10	2	0.718399	Protein	Q16658;B3KTM9;A0A384MEG1;B3KTA3	TVDPASLEY	20.01	0.005	0.017	TRUE	FALSE	FALSE
A*01:01	TVEELTDTFYY	11	2	0.628279	Protein	H7C124;Q5TEJ8-6;Q5TEJ8-5;Q5TEJ8-3;Q5TEJ8	TVEEDTFYY	332.48	0.091	0.214	TRUE	FALSE	FALSE
A*01:01	TVEERNLLSVAY	12	3	0.503783	Protein	G9K389;K7EIT4;V9HW98;B4DJF2;G9K388	TVEERNLLY	358.31	0.167	0.227	TRUE	FALSE	FALSE
A*01:01	TVSREDGSFSFY	12	1	0.487877	Protein	Q15155;A0A0G2JP90;Q5JPE7-2;Q5JPE7-3;A0A087X117	TVDGSFSFY	80.99	0.123	0.073	TRUE	FALSE	FALSE
A*01:01	VADLVENSY	9	1	0.74052	Protein	Q6ZN49;B2R5V9;A0A024R4E5;Q00341-2;H0Y394	VADLVENSY	133.73	0.035	0.107	TRUE	FALSE	FALSE
A*01:01	VAETEEGIYWRY	12	1	0.822711	Protein	Q8NCW0-3;Q8NCW0-2;Q53F67;Q8NCW0-5;Q8NCW0	VAETEEWRY	1814.37	0.546	0.7	TRUE	FALSE	FALSE
A*01:01	VIDEELLGDGHSY	13	2	0.878952	Protein	P28070;A0A140VK46;B4DFL3	VIDEEGHSY	524.39	0.11	0.29	TRUE	FALSE	FALSE
A*01:01	VIDPESGNTLY	11	2	0.788251	Protein	A0A024R125;F8VYY9;P54619;F8VVA3;P54619-2	VIDPESTLY	126.6	0.018	0.103	TRUE	FALSE	FALSE
A*01:01	VIDPVAPRY	9	11	0.763431	Protein	P07814;Q3KQZ8;B4DKX5;H6WCP5;V9GYZ6	VIDPVAPRY	98.42	0.013	0.085	TRUE	FALSE	FALSE
A*01:01	VIDSAELQAY	10	2	0.74427	Protein	P78527;P78527-2	VIDSAELQY	95.61	0.046	0.083	TRUE	FALSE	FALSE
A*01:01	VLDEAFQRY	9	20	0.821931	Protein	A0A0S2Z3U8;P06865;H3BS10;A0A087WUJ7;A0A0S2Z3W3	VLDEAFQRY	40.87	0.01	0.039	TRUE	FALSE	FALSE
A*01:01	VLDELSVTY	9	9	0.850788	Protein	B4DF98;H0YL13;A0A3B3ISZ1;Q8NB66	VLDELSVTY	42.53	0.015	0.041	TRUE	FALSE	FALSE
A*01:01	VLDFITHLY	9	3	0.853479	Protein	Q13057;K7ESK6;K7EN91;Q13057-2;K7ES73	VLDFITHLY	9.11	0.007	0.01	TRUE	FALSE	FALSE
A*01:01	VLDGTIEY	8	1	0.878776	Protein	O75243;Q9UK45	VLD-GTIEY	935.62	0.172	0.443	TRUE	FALSE	FALSE
A*01:01	VLDILLEQY	9	7	0.772881	Protein	Q9NXF1;Q9NXF1-2;B7Z9D5;A0A024R169	VLDILLEQY	96.39	0.039	0.084	TRUE	FALSE	FALSE
A*01:01	VLDINSIDNLY	11	14	0.83128	Protein	B4E019;Q53G44;B4DDY4;B2R5Q5	VLDSIDNLY	117.84	0.067	0.097	TRUE	FALSE	FALSE
A*01:01	VLDIPSKY	8	1	0.776354	Protein	P29375-2;P29375	VLD-IPSKY	2100.95	0.177	0.784	TRUE	FALSE	FALSE
A*01:01	VLDIQNNLY	9	4	0.808095	Protein	O00221;Q96F31;A0A024RD24;Q7LC14	VLDIQNNLY	17.41	0.009	0.016	TRUE	FALSE	FALSE
A*01:01	VLDLSMQGPGP	11	1	0.392283	Protein	H3BMA1	VLDLSGPGP	36989.7	44.6	55.479	FALSE	FALSE	FALSE
A*01:01	VLDNPSPFY	9	2	0.758712	Protein	Q9Y294	VLDNPSPFY	42.12	0.014	0.04	TRUE	FALSE	FALSE
A*01:01	VLDPKVGFY	9	2	0.594066	Protein	A6NMQ1;A0A087WU64;P09884	VLDPKVGFY	41.6	0.015	0.04	TRUE	FALSE	FALSE
A*01:01	VLDPYLLKY	9	41	0.962168	Protein	E9PE17;Q8IY71;Q9Y2R5;I3L0E3	VLDPYLLKY	15.11	0.004	0.014	FALSE	FALSE	FALSE
A*01:01	VLDPYLLKYF	10	3	0.941613	Protein	Q8IY71;Q9Y2R5;E9PE17;I3L0E3	VLDPYLLKY	839.07	0.526	0.409	FALSE	FALSE	FALSE
A*01:01	VLDRLTFDY	9	10	0.866105	Protein	Q8IVD9;B0FTY2;A4D2J8	VLDRLTFDY	24.35	0.066	0.02	TRUE	FALSE	FALSE
A*01:01	VLDSFLQGY	9	6	0.859168	Protein	Q86Y91-3;Q86Y91-2;Q86Y91-4;A0A0C4DGP2;A0A0C4DGP5	VLDSFLQGY	46.39	0.037	0.044	TRUE	FALSE	FALSE
A*01:01	VLDSLLVQY	9	4	0.774783	Protein	O00425	VLDSLLVQY	59.46	0.026	0.056	TRUE	FALSE	FALSE
A*01:01	VLDVISLVDKY	11	3	0.946854	Protein	C9JDL1;P50053;A0A140VJM6;P50053-2;Q53G56	VLDSLVDKY	343.43	0.157	0.219	TRUE	FALSE	FALSE
A*01:01	VLDVVERSLSNY	12	9	0.877096	Protein	P49961;P49961-4;P49961-2;P49961-5;P49961-6	VLDRSLSNY	840.99	0.518	0.409	TRUE	FALSE	FALSE
A*01:01	VLDYINGGELFY	12	1	0.651217	Protein	O00141-5;O00141;O00141-4;O00141-2;B7Z1G1	VLDGGELFY	47.75	0.088	0.046	TRUE	FALSE	FALSE
A*01:01	VLEQGPSSHYY	11	1	0.678633	Protein	F5H3L1;B4DNS9;F8WBZ3;B4DJC1;Q9NZG7	VLEPSSHYY	709.52	0.076	0.363	FALSE	FALSE	FALSE
A*01:01	VMDVKPVDY	9	2	0.90404	Protein	P27694;I3L4R8	VMDVKPVDY	215.99	0.076	0.157	FALSE	FALSE	FALSE
A*01:01	VNLPINGNGKQ	11	42	0.834787	Protein	A8MX94;V9HWE9;P09211	VPINGNGKQ	43360	72.308	89.213	TRUE	FALSE	FALSE
A*01:01	VSAEEALKY	9	3	0.872194	Protein	B4E3I9;F5H2T0;B3KNB2;O95163;Q4LE38	VSAEEALKY	64.97	0.031	0.06	TRUE	FALSE	FALSE
A*01:01	VSDAILRY	8	1	0.670774	Protein	Q9Y5W9-2;B4DKH7;J3KTN6;J3QLV8;J3QRB9	VSD-AILRY	116.83	0.068	0.096	FALSE	FALSE	FALSE
A*01:01	VSDELRQWY	9	30	0.927272	Protein	Q9P2Q2;A0A0J9YYA7	VSDELRQWY	25.82	0.016	0.022	TRUE	FALSE	FALSE
A*01:01	VSDFGLSGYV	10	4	0.626178	Protein	Q9NPI3	VSDFGLSGY	426.83	0.709	0.256	FALSE	FALSE	FALSE
A*01:01	VSDFGLSRY	9	5	0.813581	Protein	Q9P0L5;Q06187;Q9P0L7;P54762;Q9P0L6	VSDFGLSRY	7.82	0.004	0.009	TRUE	FALSE	FALSE
A*01:01	VSDGIIAPGY	10	7	0.69769	Protein	V9HWH7;B2R7P8;P31939;P31939-2;B4DP06	VSDGIAPGY	40.47	0.067	0.039	TRUE	FALSE	FALSE
A*01:01	VSDILHSIFSSY	12	6	0.935833	Protein	B4E0R6;B3KWG6;H0Y8C6;O00410-2;O00410-3	VSDSIFSSY	59.35	0.122	0.056	TRUE	FALSE	FALSE
A*01:01	VSDILHSLFSTY	12	1	0.579901	Protein	B4E340;B4DTX6;O60518	VSDSLFSTY	34.3	0.12	0.033	TRUE	FALSE	FALSE
A*01:01	VSDIVGPDGLVY	12	6	0.756864	Protein	P22087;Q96BS4;B4DLD4;M0R1H0;M0R0P1	VSDPDGLVY	46.53	0.031	0.045	TRUE	FALSE	FALSE
A*01:01	VSDPSSPQYGKYL	13	1	0.664723	Protein	B4DIV8;A0A2R8Y7U1;D3DQU2;O14773;B4DE89	VSDPSSPQY	3116.08	0.703	1.034	TRUE	FALSE	FALSE
A*01:01	VSDPVGVLY	9	3	0.759674	Protein	Q9P055-4;B3KPC2;G3V372;G3V2R2;A0A024R666	VSDPVGVLY	6.73	0.001	0.008	TRUE	FALSE	FALSE
A*01:01	VSDYLRQSY	9	2	0.753872	Protein	Q68CP9;Q68CP9-3	VSDYLRQSY	19.95	0.01	0.017	TRUE	FALSE	FALSE
A*01:01	VSEIINNAIVHY	12	11	0.875107	Protein	Q86UF1	VSENAIVHY	555.7	0.266	0.299	TRUE	FALSE	FALSE
A*01:01	VSENVTQYLQY	11	2	0.650361	Protein	Q569F6;Q59EE8;Q9Y6Q9-4;A8K0W8;Q9Y6Q9-2	VSENVTQYY	116.13	0.036	0.096	TRUE	FALSE	FALSE
A*01:01	VSEQELLRY	9	15	0.953264	Protein	A0A024RD09;Q13608-3;Q13608	VSEQELLRY	28.25	0.009	0.026	TRUE	FALSE	FALSE
A*01:01	VSEYVDAVLGKGHQY	15	1	0.498589	Protein	Q12769	VSEGKGHQY	518.91	0.266	0.288	TRUE	FALSE	FALSE
A*01:01	VTDAVALRV	9	9	0.859702	Protein	O43427-2;E9PJW6;B4DKH9;E9PSD3;Q53F51	VTDAVALRV	101.87	0.221	0.087	TRUE	FALSE	FALSE
A*01:01	VTDFIAPGY	9	4	0.743921	Protein	A0A024R6Q8;Q9NPI1-2;Q9NPI1	VTDFIAPGY	9.85	0.013	0.01	TRUE	FALSE	FALSE
A*01:01	VTDGAILGKLY	11	10	0.922873	Protein	A7MBM6;Q8NEZ4;Q8NEZ4-2;Q75MN6;Q8NEZ4-3	VTDGAILLY	16	0.01	0.015	TRUE	FALSE	FALSE
A*01:01	VTDHLGVVY	9	1	0.714744	Protein	Q9NXW2-2;V9GYN7;V9GY70;J3KPS0;Q9NXW2	VTDHLGVVY	7.69	0.005	0.009	TRUE	FALSE	FALSE
A*01:01	VTDHLGVVYY	10	9	0.658975	Protein	Q9NXW2-2;V9GYN7;V9GY70;J3KPS0;Q9NXW2	VTDHGVVYY	8.81	0.007	0.009	TRUE	FALSE	FALSE
A*01:01	VTDIHQLSF	9	1	0.760735	Protein	Q96E52;H7BZX2;X6RDQ1;Q96E52-2	VTDIHQLSF	47.02	0.051	0.045	FALSE	FALSE	FALSE
A*01:01	VTDISDLIRDSY	12	8	0.833933	Protein	O95759-2;J3KQ40;O95759	VTDISDLSY	13.87	0.029	0.013	TRUE	FALSE	FALSE
A*01:01	VTDKLFVIDALY	12	3	0.663496	Protein	Q8IUX1-5;Q8IUX1-3;Q8IUX1-4;A0A024R5L4;B4DP48	VTDKIDALY	14.61	0.047	0.014	FALSE	FALSE	FALSE
A*01:01	VTDLLKELV	9	1	0.761218	Protein	Q96T21-2;Q9H948;Q96T21-3;B4DZC7;Q59H19	VTDLLKELV	1032.32	0.671	0.474	TRUE	FALSE	FALSE
A*01:01	VTDSGRTVILY	11	1	0.489389	Protein	Q9H8H0-2;J3QLQ6;Q9H8H0	VTDSGVILY	14.63	0.005	0.014	TRUE	FALSE	FALSE
A*01:01	VTEDALIRTVSY	12	4	0.738181	Protein	F6T1Q0;Q6L8Q7;Q6L8Q7-2	VTEDATVSY	117.61	0.039	0.097	FALSE	FALSE	FALSE
A*01:01	VTEEPQRLFY	10	17	0.920246	Protein	Q96LC9;Q96LC9-2;Q96LC9-3	VTEEPQLFY	15.84	0.006	0.015	TRUE	FALSE	FALSE
A*01:01	VTEESFDSKFY	11	2	0.951647	Protein	Q5VV42;Q5VV42-2	VTEESFDFY	56.9	0.037	0.054	TRUE	FALSE	FALSE
A*01:01	VTEFEDIKSGY	11	11	0.657716	Protein	Q01105-3;Q01105;P0DME0;A0A0C4DFV9;A0A087X027	VTEFEDIKY	242.98	0.076	0.17	TRUE	FALSE	FALSE
A*01:01	VTEGGEPYRLY	11	3	0.638252	Protein	B4DJ30;Q14697;B4DZ53;Q14697-2;A0A024R592	VTEGGEPLY	327.93	0.054	0.211	TRUE	FALSE	FALSE
A*01:01	VTEITDDLHFY	11	29	0.928232	Protein	B2R5U1;H7C597;Q59FF0;B3KU67;A0A140VK49	VTEDDLHFY	38.36	0.019	0.037	TRUE	FALSE	FALSE
A*01:01	VTELHVISY	9	4	0.931675	Protein	Q63HN8-4;A0A0A0MTC1;Q63HN8-6;A0A0A0MTR7;Q63HN8	VTELHVISY	24.57	0.011	0.02	TRUE	FALSE	FALSE
A*01:01	VTENLRLSLY	10	2	0.766794	Protein	Q96RY7;B4DQZ8	VTENLLSLY	18.11	0.033	0.016	TRUE	FALSE	FALSE
A*01:01	VTEQLDAGVRY	11	2	0.857922	Protein	C9JP92;Q9NUJ7;X6RFG1;A0A0A0MT41	VTEDAGVRY	191.92	0.036	0.143	TRUE	FALSE	FALSE
A*01:01	VTFPEFLRY	9	1	0.886586	Protein	Q8NCH0;H0YN65	VTFPEFLRY	87.77	0.041	0.078	TRUE	FALSE	FALSE
A*01:01	VVDDWIESY	9	2	0.873432	Protein	Q6MZM4;Q6AI02;Q4LE48;Q8N3U4-2;Q6MZM3	VVDDWIESY	35.53	0.013	0.034	TRUE	FALSE	FALSE
A*01:01	VVDIQGVGDLY	11	3	0.740326	Protein	H3BRH4;O00418	VVDGVGDLY	102.05	0.043	0.087	TRUE	FALSE	FALSE
A*01:01	VVDPFSKKDWY	11	5	0.828016	Protein	E9PFI5;D6RI02;H0Y9Y4;P61247;B7Z3M5	VVDPFSKKY	317.81	0.132	0.206	TRUE	FALSE	FALSE
A*01:01	VVEQLKDWLY	10	17	0.943724	Protein	Q13257;A0A0S2Z414	VVEQKDWLY	278.69	0.148	0.187	TRUE	FALSE	FALSE
A*01:01	WIDFDNDYKTLY	12	4	0.837545	Protein	Q7Z355;Q7Z3U5;Q5TCD1;J3KR24;A0A0A0MSX9	WIDDYKTLY	46.47	0.166	0.044	FALSE	FALSE	FALSE
A*01:01	WIDPFEVSY	9	3	0.788824	Protein	Q14106;P50616;B0QXZ4;Q14106-2	WIDPFEVSY	39.43	0.033	0.038	TRUE	FALSE	FALSE
A*01:01	WIESSSWDGRY	11	2	0.604021	Protein	A0A024R059;Q8N995;Q01581	WIESSSWRY	268.29	0.36	0.182	FALSE	FALSE	FALSE
A*01:01	WLDLVLLKY	9	3	0.847871	Protein	P30520;A0A024R5Q7;B4E1L0	WLDLVLLKY	69.92	0.087	0.065	FALSE	FALSE	FALSE
A*01:01	WLEEGIHWQY	10	9	0.804929	Protein	Q5SWA1;B7Z9X7;B4E0U9	WLEEGIHQY	213.12	0.116	0.156	TRUE	FALSE	FALSE
A*01:01	WSDGHLIYY	9	2	0.688775	Protein	A0A024QZ35;Q96CS7-3;Q96CS7-6;A0A0A0MSE9;Q96CS7-4	WSDGHLIYY	3.45	0.002	0.005	TRUE	FALSE	FALSE
A*01:01	WSEITELLY	9	2	0.730057	Protein	P42704;E5KNY5;B4DSR0	WSEITELLY	4.32	0.013	0.006	FALSE	FALSE	FALSE
A*01:01	WTDGLFTHV	9	1	0.551923	Protein	Q14204;A0A2R8YFZ7	WTDGLFTHV	235.68	0.53	0.166	FALSE	FALSE	FALSE
A*01:01	WTDLALQY	8	2	0.730003	Protein	Q9BS18;A8K3Z6	WTD-LALQY	21.54	0.05	0.018	TRUE	FALSE	FALSE
A*01:01	WTDNRELTY	9	4	0.788151	Protein	O60449;O60449-2;Q59H44;O60449-3	WTDNRELTY	3.25	0.001	0.005	TRUE	FALSE	FALSE
A*01:01	WTELNVVVY	9	1	0.410092	Protein	Q9P2D1;Q9P2D1-2;A0A024R7V7	WTELNVVVY	25.68	0.071	0.022	FALSE	FALSE	FALSE
A*01:01	WTENIQGSIKY	11	1	0.567088	Protein	B9EG90;P11387	WTENGSIKY	54.26	0.04	0.051	FALSE	FALSE	FALSE
A*01:01	WVDDQRPENY	10	2	0.848357	Protein	F8WEX7;D3DNN4;A0A024CIM4;P06276;F8WF14	WVDDQPENY	124.21	0.05	0.101	TRUE	FALSE	FALSE
A*01:01	WVDPEDPYKGYRY	13	8	0.636911	Protein	Q13085-3;Q7Z5W8;Q13085-4;Q59FY4;A0A087WWN5	WVDPEGYRY	114.92	0.084	0.095	TRUE	FALSE	FALSE
A*01:01	WVDPYEVSY	9	3	0.900806	Protein	P78543;F8W0U7;Q6IBC8;P62324	WVDPYEVSY	22.43	0.013	0.019	TRUE	FALSE	FALSE
A*01:01	YAALHGEFY	9	1	0.859495	Protein	J3QQM5;Q9BT23;J3QL69;J3KRR0;A0A140VJN0	YAALHGEFY	80.24	0.097	0.072	TRUE	FALSE	FALSE
A*01:01	YADLSLKY	8	7	0.810051	Protein	B7Z4Y0;Q9Y320;B2R7I0;Q9Y320-2	YAD-LSLKY	123.29	0.067	0.1	TRUE	FALSE	FALSE
A*01:01	YADNQVMHFY	10	8	0.929848	Protein	Q96IE1;F5H1D6;Q9Y5S4;Q9Y5S5;Q07864	YADNQVHFY	6.3	0.009	0.008	TRUE	FALSE	FALSE
A*01:01	YADPVNAHY	9	1	0.795637	Protein	O95758-2;O95758-6;O95758-1;O95758;A0A024R163	YADPVNAHY	18.47	0.003	0.016	TRUE	FALSE	FALSE
A*01:01	YADPYRQLQY	10	11	0.904034	Protein	E9PHB5;B4DRK2;B4DG58;B1P762;E7EPC8	YADPYQLQY	8.88	0.005	0.009	TRUE	FALSE	FALSE
A*01:01	YADQLKEYLFY	11	5	0.833873	Protein	O95219;Q9H398;O95219-2	YADQEYLFY	26.38	0.041	0.023	TRUE	FALSE	FALSE
A*01:01	YIDDVFHAL	9	2	0.707917	Protein	Q92963;Q92963-3;Q92963-2	YIDDVFHAL	1348.59	0.391	0.569	TRUE	FALSE	FALSE
A*01:01	YIDEQFERY	9	6	0.890848	Protein	C9JB25;H7C310;Q15019-3;C9J938;B5MCX3	YIDEQFERY	16.11	0.005	0.015	TRUE	FALSE	FALSE
A*01:01	YIDSIPKTLGNLY	13	1	0.685044	Protein	Q7Z2Z1-2;Q7Z2Z1	YIDSIPNLY	42.71	0.066	0.041	TRUE	FALSE	FALSE
A*01:01	YIDSKFEDY	9	5	0.698017	Protein	E7ES33;Q8TC62;Q16181-2;B4DPQ6;A0A0U1RRE1	YIDSKFEDY	31.96	0.031	0.031	TRUE	FALSE	FALSE
A*01:01	YIEEFLQQY	9	5	0.846034	Protein	B4DT66;D6RC74;F8W8T7;E7EW05;Q9NVU7	YIEEFLQQY	130.88	0.037	0.105	TRUE	FALSE	FALSE
A*01:01	YIEFHSQSGFY	11	1	0.791054	Protein	Q9BSC4;B4DS83;Q9BSC4-2;Q9BSC4-4	YIESQSGFY	130.95	0.153	0.105	TRUE	FALSE	FALSE
A*01:01	YLAQDFFDRY	10	2	0.911143	Protein	P24864-3;I3L1Q9;A0A0G3DHS8;C9J2U0;P24864	YAQDFFDRY	255.15	0.274	0.175	TRUE	FALSE	FALSE
A*01:01	YLDDPDLKY	9	48	0.964374	Protein	P26358;P26358-2;Q59FP7;I6L9H2;A0A024R7E3	YLDDPDLKY	17.57	0.003	0.016	TRUE	FALSE	FALSE
A*01:01	YLDFINHY	8	2	0.913326	Protein	A0A2R8Y5T0;Q14204;A0A2R8Y6H2;A0A2R8Y706;A0A2R8YFZ7	YLD-FINHY	215.4	0.122	0.157	TRUE	FALSE	FALSE
A*01:01	YLDKEDTFFY	10	2	0.703476	Protein	Q9BTC8;D6W5A2;E7EV10;Q53RX8;E7EQY4	YLDEDTFFY	9.63	0.012	0.01	TRUE	FALSE	FALSE
A*01:01	YLDNVIGHSY	10	18	0.951779	Protein	Q9UJA5-3;Q9UJA5;Q9UJA5-2	YLDNVGHSY	24.83	0.016	0.02	TRUE	FALSE	FALSE
A*01:01	YLDPSLNSLVY	11	4	0.80394	Protein	Q6NSI4-4;Q6NSI4-2;A8K6R5;Q6NSI4	YLDPSSLVY	29.81	0.011	0.028	TRUE	FALSE	FALSE
A*01:01	YLDPVQRDLY	10	11	0.666695	Protein	F8WE52;D6W5T3;F8WDU5;Q8N720-2;Q96MB4	YLDPVQDLY	12.45	0.007	0.012	TRUE	FALSE	FALSE
A*01:01	YLDQISRY	8	1	0.554719	Protein	V9HWJ8;P61289;K7ESG5;A0A087WTV2;A0A024R203	YLD-QISRY	335.27	0.089	0.215	TRUE	FALSE	FALSE
A*01:01	YLDQISRYY	9	14	0.877877	Protein	V9HWJ8;P61289;K7ESG5;A0A087WTV2;A0A024R203	YLDQISRYY	24.5	0.008	0.02	TRUE	FALSE	FALSE
A*01:01	YLDTVPEVY	9	1	0.750244	Protein	B4DL41;P78527;P78527-2	YLDTVPEVY	16.57	0.008	0.015	TRUE	FALSE	FALSE
A*01:01	YLDWAYRSGGY	11	14	0.772922	Protein	Q9NYH9;B3KQ21;Q9P1J8;B3KX32	YLDWASGGY	123.52	0.281	0.101	TRUE	FALSE	FALSE
A*01:01	YLDYDDTRY	9	1	0.590342	Protein	Q9BVI4;F5H303	YLDYDDTRY	23.84	0.014	0.02	TRUE	FALSE	FALSE
A*01:01	YLEAVTQGHGAY	12	1	0.542259	Protein	B4E2S2;Q9UKK3	YLEAVTQAY	305.72	0.345	0.2	TRUE	FALSE	FALSE
A*01:01	YLEELPEKLKLY	12	1	0.815973	Protein	Q5T8R2;P46439;A0A3B3IU61;X5D932;P09488-2	YLEELPELY	343.86	0.152	0.22	TRUE	FALSE	FALSE
A*01:01	YLEETSIRY	9	10	0.93538	Protein	B4DKM1;B3KMS4;O75618;O75618-2;V9GY27	YLEETSIRY	44.85	0.017	0.043	TRUE	FALSE	FALSE
A*01:01	YLEQLHQLY	9	7	0.929907	Protein	P40763-2;P40763-3;P40763;K7EP08;B5BTZ6	YLEQLHQLY	29.83	0.019	0.028	TRUE	FALSE	FALSE
A*01:01	YLEQLILKY	9	24	0.942	Protein	C9JA08;B3KMN5;Q96D46;B3KT11;C9J0B9	YLEQLILKY	90.46	0.038	0.08	TRUE	FALSE	FALSE
A*01:01	YLEREDFFFY	10	3	0.673425	Protein	Q13330-2;Q13330-3;Q13330;Q86TR6;E7ESY4	YLEEDFFFY	38.08	0.114	0.037	TRUE	FALSE	FALSE
A*01:01	YLFEPHSGEEY	11	1	0.405336	Protein	Q96SB4-3;A0A024RCU9;A8K8B2;H3BLV9;Q96SB4-4	YLFEPGEEY	4226.98	0.423	1.28	TRUE	FALSE	FALSE
A*01:01	YMELYTHVY	9	3	0.868183	Protein	A0A090N7U0;Q13616;A0A0C4DGX4	YMELYTHVY	28.48	0.068	0.026	TRUE	FALSE	FALSE
A*01:01	YQDLLQLQY	9	10	0.770845	Protein	P46940;B4E2M0;F2Z2E2;A4QPB0;B4DNP4	YQDLLQLQY	50.27	0.031	0.048	TRUE	FALSE	FALSE
A*01:01	YQDPDATSLKY	11	7	0.894613	Protein	B4DLS6;Q86WJ1-5;Q9H678;Q86WJ1-4;Q86WJ1	YQDPTSLKY	400.35	0.052	0.246	TRUE	FALSE	FALSE
A*01:01	YSASINSLLERY	12	7	0.890419	Protein	Q8WXH0-2;D4YW74;A0A0A0MRE3;G3V5X4;Q8WXH0	YSASINSLY	41.13	0.133	0.039	TRUE	FALSE	FALSE
A*01:01	YSDAFLNDSY	10	1	0.720093	Protein	Q6MZM4;Q6AI02;Q4LE48;Q8N3U4-2;Q6MZM3	YSDAFNDSY	4.19	0.009	0.006	TRUE	FALSE	FALSE
A*01:01	YSDAFLNDSYLKY	13	3	0.789598	Protein	Q6MZM4;Q6AI02;Q4LE48;Q8N3U4-2;Q6MZM3	YSDDSYLKY	7.15	0.01	0.009	TRUE	FALSE	FALSE
A*01:01	YSDEFGNLDF	10	2	0.571842	Protein	Q9UJA3-2;Q9UJA3-3;A0A0S2Z618;Q9UJA3;Q9UJA3-4	YSDEFGNLF	56.68	0.158	0.053	TRUE	FALSE	FALSE
A*01:01	YSDFPFHEDY	10	9	0.857525	Protein	P31512	YSDFPFHEY	5.61	0.006	0.007	TRUE	FALSE	FALSE
A*01:01	YSDITIFEKQEY	12	24	0.960778	Protein	Q12882	YSDITIQEY	11.49	0.022	0.011	TRUE	FALSE	FALSE
A*01:01	YSDKYFDEHY	10	3	0.915756	Protein	P33552	YSDKFDEHY	6.01	0.008	0.008	TRUE	FALSE	FALSE
A*01:01	YSDKYGLGY	9	2	0.917986	Protein	B2R841;D3DWF3;Q59GD0;P53350;B4E083	YSDKYGLGY	2.75	0.001	0.004	TRUE	FALSE	FALSE
A*01:01	YSDLHAFYY	9	2	0.869672	Protein	Q5VSG8;Q5VSG8-3	YSDLHAFYY	2.08	0.001	0.003	FALSE	FALSE	FALSE
A*01:01	YSDRYIFASNLY	12	1	0.305647	Protein	P27707;D6RCP9;D6RFG8;B4E0A5;F5CTF3	YSDRASNLY	3.96	0.01	0.006	TRUE	FALSE	FALSE
A*01:01	YSDSAVLKL	9	10	0.844559	Protein	Q5CZA7;H0Y8T4;D6RBK5;P43243-2;B4DF66	YSDSAVLKL	117.27	0.117	0.097	TRUE	FALSE	FALSE
A*01:01	YSDSLVQKGY	10	3	0.747611	Protein	P52701;P52701-4;A0A087WWJ1;P52701-2;Q1L838	YSDSLVQKY	8.89	0.004	0.009	TRUE	FALSE	FALSE
A*01:01	YSDVAKGILQY	11	8	0.841143	Protein	A8K6Z0;A0A0U1RRL8;B3KWT9;Q8TB22-2;B3KS41	YSDKGILQY	14.16	0.005	0.013	TRUE	FALSE	FALSE
A*01:01	YSDVSGLLANY	11	1	0.719801	Protein	Q6PI98;Q6PI98-4;M0R3E2;K7EIY8	YSDVSGLLY	5.83	0.005	0.008	TRUE	FALSE	FALSE
A*01:01	YSEDRIGLADY	11	13	0.902787	Protein	Q9UH99;Q6NT72;A0A024R1P7;A8K129;B4DIU6	YSEDRIGLY	49.96	0.039	0.047	TRUE	FALSE	FALSE
A*01:01	YSEGYPGQRY	10	1	0.363784	Protein	P34896;P34896-3;Q53ET7;D3DXC9;J3KRZ5	YSEGPGQRY	22.78	0.008	0.019	FALSE	FALSE	FALSE
A*01:01	YSEIKDFLSY	10	15	0.89485	Protein	A8K3I3;B3KMX5;Q96SD1-3;Q96SD1-2;Q96SD1	YSEKDFLSY	8.8	0.014	0.009	TRUE	FALSE	FALSE
A*01:01	YSELGHPFGY	10	7	0.557507	Protein	A0A024RDU0;Q9UL03;G5E9X1;C9JAV7;Q9UL03-3	YSEGHPFGY	10.35	0.016	0.01	FALSE	FALSE	FALSE
A*01:01	YSELNYETSHY	11	2	0.836238	Protein	E7EPC8;B4DJU1;Q9UQB3;B3KXF4;B4DRK2	YSELETSHY	56.47	0.027	0.053	FALSE	FALSE	FALSE
A*01:01	YSEPRLSIY	9	1	0.675866	Protein	Q01432;Q01432-3;B7Z282;Q01432-4;E9PKC5	YSEPRLSIY	17.67	0.007	0.016	FALSE	FALSE	FALSE
A*01:01	YSEQPDFSGHKY	12	1	0.604172	Protein	Q13822-2;Q13822-3;Q13822;E7EUF1	YSDFSGHKY	12.63	0.01	0.012	TRUE	FALSE	FALSE
A*01:01	YSEVLTDTRGLY	12	13	0.766819	Protein	D6RFJ4;Q8TB68;Q8TB68-2;A0A024R7R8	YSEDTRGLY	12.14	0.054	0.012	TRUE	FALSE	FALSE
A*01:01	YSEYPPFSHRY	11	9	0.551736	Protein	Q96BY9;E5RHW0;H0YAZ1;A0A140VK59;H0YBH7	YSEPFSHRY	26.33	0.01	0.023	TRUE	FALSE	FALSE
A*01:01	YSFDNLPEKY	10	3	0.837428	Protein	O00444-2;O00444-3;J3KR84;O00444;J3KR82	YSDNLPEKY	17.51	0.005	0.016	TRUE	FALSE	FALSE
A*01:01	YSFLDKMSFY	10	1	0.680548	Protein	Q5SRE5-2;Q5SRE5	YSFDKMSFY	67.66	0.165	0.063	TRUE	FALSE	FALSE
A*01:01	YSNGVINGAELY	12	1	0.68435	Protein	A0A0U1RQZ9;P51531;B4DK35;P51531-2;F6VDE0	YSNNGAELY	64.97	0.1	0.06	TRUE	FALSE	FALSE
A*01:01	YSQDYQQFY	9	8	0.74045	Protein	A0A0S2Z549;A0A024R2U6;P52756;Q59HE6	YSQDYQQFY	9.62	0.006	0.01	TRUE	FALSE	FALSE
A*01:01	YSQELSLLY	9	4	0.763751	Protein	P78527;P78527-2	YSQELSLLY	5.31	0.005	0.007	TRUE	FALSE	FALSE
A*01:01	YSQYPVPDVSTY	12	1	0.704895	Protein	P98175;P98175-4;A0A0S2Z4W4;Q7Z3D7;A0A0S2Z4X1	YSQPDVSTY	601.61	0.155	0.32	TRUE	FALSE	FALSE
A*01:01	YSSEYHYVGGFY	12	2	0.789963	Protein	P53634;B4DJQ8	YSSEVGGFY	30.69	0.215	0.029	TRUE	FALSE	FALSE
A*01:01	YSSYPIKLFY	10	1	0.773084	Protein	Q9NVQ7;B3KQ68;Q9H9S3-2;Q9H9S3;H7C069	YSSPIKLFY	18.5	0.072	0.016	FALSE	FALSE	FALSE
A*01:01	YSTDENFRY	9	1	0.836901	Protein	Q9BYX4;A0A3B3IRK8;Q9BYX4-2;Q53TB6;A8KA76	YSTDENFRY	23.92	0.02	0.02	TRUE	FALSE	FALSE
A*01:01	YSVYRTVIEYY	11	6	0.704996	Protein	P61599;A8MZB2	YSVYRTEYY	825.91	0.72	0.404	TRUE	FALSE	FALSE
A*01:01	YTADGKEVLEY	11	7	0.849492	Protein	B4DF86;J3KP27;G5EA23;B4DF36;G3V1A0	YTADEVLEY	52.9	0.025	0.05	TRUE	FALSE	FALSE
A*01:01	YTAVVPLVY	9	113	0.910813	Protein	P01591;D6RHJ6;D6RD17	YTAVVPLVY	9.76	0.022	0.01	TRUE	FALSE	FALSE
A*01:01	YTDATPLRV	9	15	0.817852	Protein	F1T0L5;Q8N8A6	YTDATPLRV	23.18	0.065	0.019	TRUE	FALSE	FALSE
A*01:01	YTDFDGTRVY	10	32	0.946181	Protein	C9J8V9;A0A024RD25;A0A024QYW7;Q9P1W9;Q86V86	YTDFDGTRY	5.61	0.002	0.007	TRUE	FALSE	FALSE
A*01:01	YTDHQFTELTRLY	13	7	0.598507	Protein	A0A024RB75;B3KTN4;Q0QEL2;O75390;B7Z1E1	YTDHQFTLY	5.56	0.013	0.007	FALSE	FALSE	FALSE
A*01:01	YTDIPKIIY	9	7	0.796465	Protein	Q9NZ71-7;Q9NZ71-6;Q9NZ71-4;R4IXY3;D6RA96	YTDIPKIIY	8.99	0.003	0.01	TRUE	FALSE	FALSE
A*01:01	YTDIVGLLL	9	3	0.807093	Protein	F5GY33;A0A024R7P0;O14593-3;O14593;A0A024R7M1	YTDIVGLLL	37.33	0.14	0.036	TRUE	FALSE	FALSE
A*01:01	YTDLLRLFEY	10	11	0.907484	Protein	V9HW04;P62140;B4E163;C9J9S3;C9JP48	YTDLLRLEY	3.38	0.011	0.005	TRUE	FALSE	FALSE
A*01:01	YTDMESEDYHFY	12	5	0.915236	Protein	Q7Z6Z7;A0A024R9W5;Q5H924;Q3B7K0;A0A024R9Y3	YTDEDYHFY	3.92	0.005	0.006	TRUE	FALSE	FALSE
A*01:01	YTDNLVRVW	9	4	0.756539	Protein	P63244;D6RAC2;D6RHH4;J3KPE3;D6RF23	YTDNLVRVW	1786.3	0.401	0.692	TRUE	FALSE	FALSE
A*01:01	YTDTGLWGLY	10	1	0.617207	Protein	Q96CP5;B3KQ85;G3V0E4;B3KM34;B4DM90	YTDTGLGLY	2.67	0.002	0.004	TRUE	FALSE	FALSE
A*01:01	YTDVSTRY	8	4	0.822696	Protein	Q9Y320;B7Z4Y0;B2R7I0;Q9Y320-2	YTD-VSTRY	17.12	0.007	0.015	TRUE	FALSE	FALSE
A*01:01	YTDYGGLIFNSY	12	2	0.625124	Protein	D2IKF4;A0A343GRX2;C8XWJ6;A0A343UGE8;A0S3T1	YTDYGGLSY	4.67	0.005	0.007	TRUE	FALSE	FALSE
A*01:01	YTEAEEFFVKY	11	9	0.950649	Protein	Q9HCK8;Q9HCK8-2;A0A2R8Y4P3;A0A2R8Y840	YTEAEEVKY	16.54	0.027	0.015	TRUE	FALSE	FALSE
A*01:01	YTEAISVGEKLY	12	1	0.713648	Protein	Q9H9A5-2;H7C1X9;Q9H9A5;Q9H9A5-4;Q9H9A5-3	YTEAGEKLY	15.05	0.042	0.014	FALSE	FALSE	FALSE
A*01:01	YTEALNIADY	10	1	0.689845	Protein	I3L1Y3;I3L2K5;Q8IWR0;I3L382	YTEALNIAY	11.24	0.045	0.011	TRUE	FALSE	FALSE
A*01:01	YTEDEIYELSY	11	1	0.548985	Protein	O95267;O95267-5;H0YMF3;Q8TDF6-9;Q8TDF6-7	YTEDEELSY	13.57	0.005	0.013	TRUE	FALSE	FALSE
A*01:01	YTEDSPGLKV	10	9	0.866757	Protein	Q53FA5;S4R3B5;P60468	YTDSPGLKV	393.7	0.317	0.243	TRUE	FALSE	FALSE
A*01:01	YTEEFDFKEY	10	3	0.838783	Protein	A0A0C4DFM7;H0YDJ1;H0YEE8;Q5TAX3;E9PKY2	YTEEFDFKY	8.25	0.014	0.009	TRUE	FALSE	FALSE
A*01:01	YTEFTPTEKDEY	12	1	0.662773	Protein	A6XND9;B4E0X1;F5H6I0;A6XMH4;P61769	YTEFTPTEY	18.79	0.033	0.017	FALSE	FALSE	FALSE
A*01:01	YTEFVPQIPGY	11	6	0.869342	Protein	A0A087WXK2;A0A087WX23;A0A087WUL4;D6W5Q9;Q86TG7	YTEFVPQIY	51.63	0.038	0.049	TRUE	FALSE	FALSE
A*01:01	YTEGDALDALGLK	13	27	0.966086	Protein	P62875	YTEGDALLK	3911	2.114	1.207	FALSE	FALSE	FALSE
A*01:01	YTEGDALDALGLKRY	15	42	0.951943	Protein	P62875	YTEGDALRY	53.32	0.066	0.05	FALSE	FALSE	FALSE
A*01:01	YTEIDWKAY	9	2	0.811099	Protein	Q92685	YTEIDWKAY	34.2	0.037	0.033	FALSE	FALSE	FALSE
A*01:01	YTELEAIMY	9	3	0.877395	Protein	P51659-3;A0A2R8Y7L2;B4DSD0;E7ER27;B4DI68	YTELEAIMY	6.1	0.004	0.008	TRUE	FALSE	FALSE
A*01:01	YTELLAQVY	9	3	0.837419	Protein	J3QKK3;H7C1R0;B4E0G0;H7C2Q5;J3QR58	YTELLAQVY	8.07	0.007	0.009	TRUE	FALSE	FALSE
A*01:01	YTELQLIEEALQKY	14	1	0.616654	Protein	Q9UJX2-3;Q9UJX2	YTEEALQKY	97.92	0.096	0.084	TRUE	FALSE	FALSE
A*01:01	YTELTTAIRTY	11	2	0.779683	Protein	Q96A65-2;Q6NX51;Q96A65;Q8TAR2	YTELTTATY	33.78	0.046	0.033	TRUE	FALSE	FALSE
A*01:01	YTEMTGKLISSY	12	1	0.500228	Protein	C9J5K4;Q96SK2-2;Q96SK2;Q96SK2-4;A0A140VJX5	YTEMTGSSY	25.12	0.046	0.021	TRUE	FALSE	FALSE
A*01:01	YTEPNYWIRY	10	39	0.95888	Protein	Q8IVL5;Q8IVL5-2	YTEPNYIRY	7.67	0.007	0.009	TRUE	FALSE	FALSE
A*01:01	YTEQLLRGLSY	11	17	0.798121	Protein	Q13233	YTEQRGLSY	30.54	0.024	0.029	TRUE	FALSE	FALSE
A*01:01	YTESWRWSAY	10	12	0.759339	Protein	F5H1C8	YTESWRSAY	9.78	0.056	0.01	FALSE	FALSE	FALSE
A*01:01	YTETEPYHNY	10	1	0.844672	Protein	Q86YU5;B4DTK7;E7ERS3;B4DZ24;Q86VM9-2	YTETEPYHY	18.9	0.006	0.017	TRUE	FALSE	FALSE
A*01:01	YTFEPRTPDELY	12	3	0.565096	Protein	A8K646;Q92882	YTFEPDELY	258.04	0.142	0.176	TRUE	FALSE	FALSE
A*01:01	YTFEPRTPDELYF	13	2	0.484098	Protein	Q92882	YTFPDELYF	2617.72	1.467	0.913	TRUE	FALSE	FALSE
A*01:01	YTFGTKEPLY	10	3	0.919416	Protein	Q5HYH5;O43809;A0A024R6W2;B2R6U8	YTFGTKELY	235.78	0.153	0.166	TRUE	FALSE	FALSE
A*01:01	YTFITEDQARY	11	1	0.273194	Protein	A8K6X3;A0A0C4DG89;D3DQA6;Q7L014	YTTEDQARY	369.73	0.13	0.232	TRUE	FALSE	FALSE
A*01:01	YTFPNGAKY	9	10	0.899565	Protein	Q502X0;B8ZZN7;A0A2R8YE86;F8WEM8	YTFPNGAKY	118.28	0.035	0.097	TRUE	FALSE	FALSE
A*01:01	YTFSSIEREEY	11	12	0.810263	Protein	Q08945;A0A024R4Z6	YTFSSIEEY	514.42	0.189	0.287	TRUE	FALSE	FALSE
A*01:01	YTGTPDWLY	9	1	0.669196	Protein	Q9H1P3-2;A0A2R8YDU7;A0A2R8YD49;B2RDK3;A0A2R8YEX0	YTGTPDWLY	14.53	0.03	0.014	TRUE	FALSE	FALSE
A*01:01	YTGVQILLY	9	6	0.767174	Protein	A0A024R640;Q9NUQ2;Q6NUM7	YTGVQILLY	11.67	0.031	0.011	TRUE	FALSE	FALSE
A*01:01	YTIYRPDEGY	10	3	0.748873	Protein	Q4KMP7;H3BSE1	YTIYRPDEY	234.44	0.224	0.166	TRUE	FALSE	FALSE
A*01:01	YTLYRPEEGY	10	1	0.270912	Protein	Q9BXI6;H7C471;Q9BXI6-2;A7E244;B5MD46	YTLYRPEEY	563.31	0.274	0.302	TRUE	FALSE	FALSE
A*01:01	YTMKEVLFY	9	1	0.818256	Protein	A0A0A8KB75;A0A0A8KB70;A0A0A8KB88;A0A0A8KBA1;A0A0A8K978	YTMKEVLFY	10.82	0.025	0.011	TRUE	FALSE	FALSE
A*01:01	YTVSREDGSFSFY	13	18	0.868588	Protein	Q15155;A0A0G2JP90;Q5JPE7-2;Q5JPE7-3;A0A087X117	YTDGSFSFY	5.41	0.031	0.007	TRUE	FALSE	FALSE
A*01:01	YVDAVLGKGHQY	12	1	0.866756	Protein	Q12769	YVDGKGHQY	69.66	0.032	0.064	TRUE	FALSE	FALSE
A*01:01	YVDDASWMRY	10	8	0.940192	Protein	Q6AHZ7;Q12789;Q6AWA4;Q12789-3	YVDDASMRY	7.74	0.005	0.009	TRUE	FALSE	FALSE
A*01:01	YVDPEREIY	9	1	0.470228	Protein	B7ZKK1;H0Y5J5;H0Y7F1;Q7RTV5	YVDPEREIY	36.71	0.008	0.036	FALSE	FALSE	FALSE
A*01:01	YVDPQFLTY	9	11	0.900068	Protein	Q8NG27;Q8NG27-3;O43164-2;B3KU76;W0S1J7	YVDPQFLTY	5.4	0.001	0.007	TRUE	FALSE	FALSE
A*01:01	YVDPSTDERLSY	12	1	0.343668	Protein	Q15149-8;Q15149;Q15149-3;Q15149-6;Q15149-7	YVDPSTLSY	17.28	0.007	0.016	TRUE	FALSE	FALSE
A*01:01	YVDQAELEKY	10	9	0.927671	Protein	D6RIW1;A0A024R059;Q8N995;Q01581	YVDQAELKY	20.88	0.012	0.018	FALSE	FALSE	FALSE
A*01:01	YVDQVLQLVY	10	3	0.770651	Protein	P11717;Q59EZ3	YVDQVLQLY	12.35	0.016	0.012	TRUE	FALSE	FALSE
A*02:01	AAAPVVPAV	9	6	0.811702	Protein	E7EWY6;B4DXL6;O95271-2;O95271;E5RHD2	AAAPVVPAV	107.07	0.106	1.133	TRUE	FALSE	FALSE
A*02:01	AALEEADKMFL	11	2	0.783769	Protein	H0YN68;Q9BZT5;Q9Y6B2;Q9Y6B2-2	AALEEAMFL	7519.84	7.33	12.219	TRUE	FALSE	TRUE
A*02:01	AAVAAALARLLAA	13	2	0.802951	Protein	Q8TCT7-4;Q8TCT7;A0A087WWL4;A0A087WZ93;Q8TCT7-2	AALARLLAA	15356.9	48.4	20.42	TRUE	FALSE	FALSE
A*02:01	ACTTLTGITV	10	1	0.632526	Protein	P41439-3;A0A024R5N0;A0A087WXH3	ATTLTGITV	8373.68	12.499	13.066	FALSE	FALSE	TRUE
A*02:01	ADASLVFPLL	10	2	0.690535	Protein	A0A024R7E9;P49366;M0R1T4;A0A087WZK0;A0A024R7G5	AASLVFPLL	7990.42	17.865	12.692	FALSE	FALSE	FALSE
A*02:01	ADILYILYV	9	1	0.610991	Protein	P46019	ADILYILYV	3893.43	5.886	8.316	FALSE	FALSE	TRUE
A*02:01	AEGLTLAQV	9	1	0.710314	Non-coding	NR_136699-11;NR_136697-3;NR_136696-6;NR_136699-9;NR_136697-10	AEGLTLAQV	18840.6	14.928	24.597	FALSE	FALSE	TRUE
A*02:01	AGFAGDDAPR	10	4	0.968954	Protein	L0R5C4;E7EVS6;Q53G76;A1E282;P60709	AGFGDDAPR	31290.7	45	45.972	TRUE	TRUE	TRUE
A*02:01	AGKVNFILLL	10	1	0.706915	Non-coding	NR_164156-3;NR_164156-1;NR_164156-2	AGVNFILLL	9984.07	20.954	14.703	FALSE	FALSE	TRUE
A*02:01	AIAAAGVVHAV	11	2	0.659239	Protein	Q9BTP0;Q05BQ6;A0A2H4GYZ1;A0A2K8FR47;Q9GZT5	AIAGVVHAV	803.42	1.514	3.616	FALSE	FALSE	FALSE
A*02:01	AIAPIIAAV	9	1	0.845126	Protein	Q9BQ52-2;E7ES68;B4E365;H7C2I4;Q9BQ52	AIAPIIAAV	7.42	0.021	0.079	TRUE	FALSE	FALSE
A*02:01	AIFSAIIFL	9	1	0.735706	Protein	Q6NTF9-2;Q6NTF9	AIFSAIIFL	24.7	0.199	0.366	TRUE	FALSE	FALSE
A*02:01	AIIDKYIKL	9	3	0.912448	Protein	Q6NUM9;H7BZ16;B4DKE1;Q6NUM9-2;H7BZ81	AIIDKYIKL	397.7	0.125	2.469	FALSE	FALSE	FALSE
A*02:01	AIIESTPEL	9	1	0.812463	Protein	O60271;O60271-2;O60271-4;O60271-9;A0A087X2D8	AIIESTPEL	29.52	0.028	0.434	FALSE	FALSE	FALSE
A*02:01	AIIEYMPLL	9	3	0.948638	Protein	A8K8B0;P30154-2;B4DE69;B4DQY1;A8K7B7	AIIEYMPLL	8.59	0.05	0.1	TRUE	FALSE	FALSE
A*02:01	AIISELVSI	9	5	0.872613	Protein	D3DQV9;P78344-2;P78344;H0Y3P2;B4DZF2	AIISELVSI	35.31	0.114	0.502	TRUE	FALSE	FALSE
A*02:01	AILAHLNTV	9	1	0.828115	Protein	Q9UNS1-2;B3KMU4;Q9UNS1	AILAHLNTV	12.81	0.064	0.173	TRUE	FALSE	FALSE
A*02:01	AILGITESFQV	11	7	0.879669	Protein	V9HW96;Q9H369;B7Z4R3;P78371;P78371-2	AILGESFQV	132.78	0.721	1.295	TRUE	FALSE	FALSE
A*02:01	AILPTSIFL	9	1	0.671757	Protein	O14744;O14744-3;B4DV00;O14744-5;B2RDD7	AILPTSIFL	77.03	0.232	0.895	TRUE	FALSE	FALSE
A*02:01	AILTVVPKI	9	2	0.8747	Protein	Q9Y4B6;Q9Y4B6-2	AILTVVPKI	160.61	0.19	1.464	TRUE	FALSE	FALSE
A*02:01	AIMDIVIKV	9	15	0.96661	Protein	C9J185;Q68DI6;E7ER02;B3KY45;Q9NZJ5	AIMDIVIKV	5.3	0.003	0.04	TRUE	FALSE	FALSE
A*02:01	AIQDKLFQV	9	4	0.938016	Protein	J3QTB2;J3QTA6;H0Y922;Q9BRQ6	AIQDKLFQV	12.38	0.012	0.167	TRUE	FALSE	FALSE
A*02:01	AIVDKVPSV	9	41	0.962168	Protein	Q9Y678	AIVDKVPSV	12.55	0.006	0.169	TRUE	FALSE	FALSE
A*02:01	ALAAALAHI	9	11	0.932107	Protein	Q9NR30-2;Q9BQ39;Q9NTA9;Q9NR30;B4DW97	ALAAALAHI	11.65	0.173	0.157	TRUE	FALSE	FALSE
A*02:01	ALAALHVTL	9	8	0.933884	Protein	B4DTJ9;Q6IAD8;Q5T4K4;Q5T4K2;Q9NY26	ALAALHVTL	28.56	0.094	0.422	TRUE	FALSE	FALSE
A*02:01	ALAAPDIVPAL	11	1	0.653777	Protein	E5RFW3;A0A3B3ISJ3;Q9H8G2;E5RFV1	ALADIVPAL	65.17	0.152	0.794	TRUE	FALSE	FALSE
A*02:01	ALADLQEAVKL	11	4	0.966324	Protein	Q9C0D5-2;Q9C0D5	ALADLQVKL	327.3	0.202	2.213	TRUE	FALSE	FALSE
A*02:01	ALADTLVLL	9	1	0.761863	Protein	Q8IXB0;P41146;Q6FGM5;A0A0G2JQE4;P41146-2	ALADTLVLL	9.1	0.019	0.111	TRUE	FALSE	FALSE
A*02:01	ALAEALKEV	9	1	0.955485	Protein	Q6PI26;Q6PI26-2;A0A024R357	ALAEALKEV	5.92	0.009	0.055	TRUE	FALSE	FALSE
A*02:01	ALAEEITLHYA	11	1	0.82063	Protein	B4E199;Q0D2I0;B3KPF8;Q6ZSY5;Q6ZSY5-2	ALAEEIHYA	62.74	0.16	0.774	FALSE	FALSE	FALSE
A*02:01	ALAEGQLRL	9	5	0.963242	Protein	A0A0G2JRI7;Q8NF37;D3DTC2;A0A0G2JQ62	ALAEGQLRL	36.2	0.03	0.512	TRUE	FALSE	FALSE
A*02:01	ALAEIAKAEL	10	6	0.830139	Protein	A0A384N5Z8;Q9BSV4;P23246;Q86VG2;Q6PIX2	ALAEIAAEL	50.58	0.302	0.662	FALSE	FALSE	FALSE
A*02:01	ALAERLDIV	9	6	0.801969	Protein	K7EN58;Q6QNY0	ALAERLDIV	13	0.076	0.175	TRUE	FALSE	FALSE
A*02:01	ALAGHQDGITFI	12	6	0.625382	Protein	Q8TEB1-3;H0YL98;Q59GN6;B4DKW4;Q8TEB1-2	ALADGITFI	146.32	0.774	1.382	TRUE	FALSE	FALSE
A*02:01	ALAGVSFEI	9	8	0.860975	Protein	Q15155;A0A0G2JP90;Q5JPE7-2;Q5JPE7-3;A0A087X117	ALAGVSFEI	5.85	0.061	0.054	TRUE	FALSE	FALSE
A*02:01	ALAKIEIKL	9	2	0.947486	Protein	A0A384MTZ1;A0A384NPX8;P0C7P4;P47985	ALAKIEIKL	74.96	0.054	0.879	TRUE	FALSE	FALSE
A*02:01	ALAKLVEAI	9	2	0.82792	Protein	Q5T8U2;Q9BY74;P62424	ALAKLVEAI	46.7	0.171	0.618	TRUE	FALSE	FALSE
A*02:01	ALAKPPVVSV	10	1	0.86544	Protein	Q96L91-2;Q96L91-5;Q96L91-4;Q96L91;Q96L91-3	ALAPPVVSV	59.02	0.059	0.744	TRUE	FALSE	FALSE
A*02:01	ALALIYNEAL	10	8	0.875451	Protein	B2R577;P06703	ALALINEAL	277.14	2.267	1.997	TRUE	FALSE	TRUE
A*02:01	ALANHLIKV	9	10	0.928707	Protein	Q9H4M9;A0A024R571;B4DMV9;B4DR44;Q9NZN3	ALANHLIKV	5.61	0.006	0.051	TRUE	FALSE	FALSE
A*02:01	ALANQIPTV	9	5	0.869882	Protein	E9PHA6;B4DL39;A0A2R8Y713;B4DSB9;A0A2R8YG02	ALANQIPTV	5.06	0.003	0.035	TRUE	FALSE	FALSE
A*02:01	ALAPAPPQV	9	2	0.868445	Protein	E9PKH5;Q04206-4;Q04206;B4E082;Q04206-3	ALAPAPPQV	10.62	0.004	0.141	TRUE	FALSE	FALSE
A*02:01	ALAPGLPTA	9	11	0.869672	Non-coding	NR_026598-1	ALAPGLPTA	9.89	0.013	0.128	TRUE	FALSE	FALSE
A*02:01	ALAQRLLEV	9	4	0.930676	Protein	Q6ZMZ3-3;Q6ZMZ3-2;G3V533;Q6ZMZ3	ALAQRLLEV	9.39	0.018	0.118	TRUE	FALSE	FALSE
A*02:01	ALASVAYQV	9	2	0.895199	Protein	Q9P2A4;Q9P2A4-2	ALASVAYQV	6.52	0.022	0.064	TRUE	FALSE	FALSE
A*02:01	ALASVIKEL	9	3	0.957734	Protein	A8K4S8;Q8WYA0;A0A024RBJ1;H0YHE2	ALASVIKEL	48.32	0.046	0.637	TRUE	FALSE	FALSE
A*02:01	ALASVIMGL	9	10	0.874967	Protein	A8K8B0;P30154-2;B4DE69;B4DQY1;A8K7B7	ALASVIMGL	7.52	0.036	0.08	TRUE	FALSE	FALSE
A*02:01	ALATLIHQV	9	12	0.945296	Protein	F5H3M6;F5GXT7;F5H248;B3KY75;Q9UBW8	ALATLIHQV	6.08	0.004	0.057	TRUE	FALSE	FALSE
A*02:01	ALAWLDVTL	9	1	0.861781	Protein	B4DU05;Q6P9H5;B4DH95;B2RBH7;Q6P9H5-2	ALAWLDVTL	17.04	0.168	0.245	TRUE	FALSE	FALSE
A*02:01	ALDDFSISV	9	4	0.833517	Protein	Q8NI36;A0A0A0MTB8	ALDDFSISV	4.69	0.003	0.028	TRUE	FALSE	FALSE
A*02:01	ALDDMISTL	9	2	0.861103	Protein	Q2TU64;Q59H77;Q5SZW8;B4DUR8;B3KX11	ALDDMISTL	14.46	0.01	0.196	TRUE	FALSE	FALSE
A*02:01	ALDEVFTKV	9	4	0.965509	Protein	Q9UMX5	ALDEVFTKV	7.68	0.003	0.083	TRUE	FALSE	FALSE
A*02:01	ALDEVIFSL	9	1	0.865649	Protein	P08243-3;F8WEJ5;B4DY32;P08243;P08243-2	ALDEVIFSL	4.06	0.002	0.018	TRUE	FALSE	FALSE
A*02:01	ALDFFVPAL	9	1	0.736127	Protein	Q6PHR2;Q6PHR2-4;B4DQN3;B4DDG2;Q6PHR2-3	ALDFFVPAL	12.81	0.065	0.173	TRUE	FALSE	FALSE
A*02:01	ALDILITNV	9	4	0.936491	Protein	Q7Z6U1;Q7Z6U2;Q7Z6U0;Q7Z6T9;P62380	ALDILITNV	26.16	0.056	0.388	TRUE	FALSE	FALSE
A*02:01	ALDPAAQAFL	10	2	0.844828	Protein	Q5SWA1;B7Z9X7;B4E0U9	ALDPAQAFL	116.15	0.345	1.19	TRUE	FALSE	FALSE
A*02:01	ALDPLADKILI	11	12	0.961745	Protein	Q6NTG3;Q9UJA2;Q9UJA2-2	ALDPDKILI	1020.3	1.243	4.099	TRUE	FALSE	FALSE
A*02:01	ALDPNIATL	9	4	0.845905	Protein	Q8WXA9;E5RJ76;Q69YM5;Q8WXA9-2;B3KRJ9	ALDPNIATL	17.82	0.006	0.258	TRUE	FALSE	FALSE
A*02:01	ALDSQVPKV	9	12	0.958802	Protein	Q9NXY1;Q5JSP0-2;Q5JSP0-3;A0A024R252;A8K9G1	ALDSQVPKV	16.67	0.006	0.238	FALSE	FALSE	FALSE
A*02:01	ALDTLEDDMTI	11	2	0.626914	Protein	P37268-5;B4DND3;B7Z9R8;E9PNM1;P37268	ALLEDDMTI	205.63	0.42	1.697	TRUE	FALSE	FALSE
A*02:01	ALDVQGIYRV	10	1	0.848687	Protein	B4DLZ1;Q9P107;Q9P107-2;A0A024R7N1	ALDQGIYRV	71.4	0.277	0.848	TRUE	FALSE	FALSE
A*02:01	ALFARPDLLLL	11	2	0.832165	Protein	A0A0S2Z5L1;Q9NUQ8-2;Q9NUQ8;B4DRU9	ALFPDLLLL	41.17	0.119	0.563	TRUE	FALSE	FALSE
A*02:01	ALFDAQAQV	9	2	0.843314	Protein	E9PPF2;P29597;Q53HA9;A0A024R7E4;E9PQL2	ALFDAQAQV	6.54	0.007	0.064	TRUE	FALSE	FALSE
A*02:01	ALFDFTGNSKLEL	13	2	0.791943	Protein	Q53FG4;Q6FGM9;A0A217FLJ2;B0QY04;Q15080	ALFDFTLEL	23.16	0.431	0.341	TRUE	FALSE	FALSE
A*02:01	ALFEESGLIRI	11	8	0.961773	Protein	Q9NYQ7;Q9NYQ7-2;Q5Y190	ALFEGLIRI	41.37	0.109	0.565	TRUE	FALSE	FALSE
A*02:01	ALFEEVPEL	9	17	0.94985	Protein	P31939;B2R7P8;H7C1S2;P31939-2;B4DP06	ALFEEVPEL	5.15	0.002	0.037	TRUE	FALSE	FALSE
A*02:01	ALFEGKVQL	9	7	0.964398	Protein	B4DGR6;B4E286;Q8NEZ3;Q8NEZ3-2;D6R9P6	ALFEGKVQL	10.58	0.005	0.14	TRUE	FALSE	FALSE
A*02:01	ALFEQKGPVYV	11	5	0.946981	Protein	D3DNF9;C9JA36;P54709-2;P54709	ALFEGPVYV	10.31	0.01	0.136	TRUE	FALSE	FALSE
A*02:01	ALFETLIQL	9	1	0.905575	Protein	Q6ZMV5;Q6ZMV5-2	ALFETLIQL	7.22	0.005	0.076	TRUE	FALSE	FALSE
A*02:01	ALFKAWAL	8	5	0.77334	Non-coding	NR_046000-2;NR_046000-1	ALF-KAWAL	258.14	1.107	1.928	TRUE	FALSE	FALSE
A*02:01	ALFPALRPGGFQA	13	10	0.837072	Protein	E7EMC7;E3WH17;D6RBF1;C9J6J8;B4DE82	ALFPGGFQA	73.34	0.843	0.865	TRUE	FALSE	FALSE
A*02:01	ALFPAPLAQI	10	6	0.927658	Protein	A0A024R3D4;Q8ND24-2;Q8ND24	ALFPAPLQI	41.53	0.125	0.566	TRUE	FALSE	FALSE
A*02:01	ALFPGVALL	9	5	0.947619	Protein	P30101;V9HVY3;B4DJ98;F8WBS6;B3KQT9	ALFPGVALL	8.9	0.016	0.107	TRUE	FALSE	FALSE
A*02:01	ALFPHLLQPVL	11	5	0.914255	Protein	P55060;B4DPS6;B4DM31;A0A384NKW7;B4DS32	ALFPHLLQL	31.71	0.106	0.461	TRUE	FALSE	FALSE
A*02:01	ALFPHLLQPVLW	12	2	0.642908	Protein	B4DUC5;B4DM31;B4DPS6;P55060-4;B4DS32	ALFPHLLQL	218.26	2.954	1.758	TRUE	FALSE	FALSE
A*02:01	ALFQHITAL	9	1	0.835411	Protein	Q9P055-4;B3KPC2;G3V372;G3V4D0;G3V2R2	ALFQHITAL	9.57	0.012	0.122	TRUE	FALSE	FALSE
A*02:01	ALFQRPPLI	9	12	0.967723	Protein	C9IYT0;O60832;U5UA77;H7BZF2;O60832-2	ALFQRPPLI	62.17	0.075	0.77	TRUE	FALSE	FALSE
A*02:01	ALFSFLYHL	9	4	0.957689	Protein	Q5H962;A0A024R9W5;Q9NXW1;A0A024R9U8;Q7Z6Z7	ALFSFLYHL	3.52	0.021	0.012	TRUE	FALSE	FALSE
A*02:01	ALFSGPIYHI	10	4	0.962959	Protein	B4DLM4	ALFSGPIYI	10.54	0.087	0.14	FALSE	FALSE	FALSE
A*02:01	ALFTFSPLTV	10	3	0.914438	Protein	Q5VWQ0-4;A0A0C4DGT8;A0A0C4DH79;Q5VWQ0;A0A087WWP8	ALFTSPLTV	7.62	0.14	0.082	TRUE	FALSE	FALSE
A*02:01	ALFTKVLENV	10	4	0.742659	Protein	Q8TCU6-2;A0A2X0SFH1;Q8TCU6	ALFTKVLEV	17.74	0.202	0.257	FALSE	FALSE	FALSE
A*02:01	ALGDKFLLRV	10	1	0.843653	Protein	Q13203;A0A087X023	ALGDFLLRV	28.9	0.263	0.426	TRUE	FALSE	FALSE
A*02:01	ALGEEALLRYV	11	2	0.87246	Protein	K7EJ08;D5G3K3;A5PLM6;Q92503-2;Q7Z3R7	ALGEEALYV	151.47	0.559	1.413	TRUE	FALSE	FALSE
A*02:01	ALGFVYKL	8	1	0.967439	Protein	Q13325;Q13325-2	AL-GFVYKL	420.61	0.857	2.548	TRUE	FALSE	FALSE
A*02:01	ALGFYPAEITL	11	4	0.912615	Protein	W0GCP4;C5J3Z8;U4N162;Q2L4W9;W1ICE9	ALYPAEITL	352.99	0.216	2.312	TRUE	FALSE	FALSE
A*02:01	ALGNIVHGL	9	1	0.555918	Protein	S4R3N8;B3KNV9;S4R400;Q5VW36	ALGNIVHGL	36.06	0.067	0.51	FALSE	FALSE	FALSE
A*02:01	ALHDILTEI	9	1	0.800677	Protein	A8K4Z2;Q59GW7;P40937-2;P40937;A8K3S0	ALHDILTEI	10.33	0.01	0.136	TRUE	FALSE	FALSE
A*02:01	ALHHAVIFL	9	1	0.593407	Protein	Q7Z2K6;A0A0C4DGF0;E7ER77;Q7Z2K6-2;D3DRI3	ALHHAVIFL	25.38	0.099	0.376	TRUE	FALSE	FALSE
A*02:01	ALIDGSREGFYL	12	3	0.884593	Protein	H0Y3L9;Q13191-2;B5MC15;Q13191;B8K284	ALIDGSFYL	9.98	0.156	0.13	TRUE	FALSE	FALSE
A*02:01	ALIDVHDRDSG	11	2	0.373537	Protein	Q59H32;Q9Y5H0-2;Q9Y5H0;A4FUP4;A4FUP3	ALIDVHDSG	28111.6	31.15	39.053	FALSE	FALSE	FALSE
A*02:01	ALIEAEKVAQV	11	6	0.942953	Protein	O94905;A0A384ME54;E5RHW4;E5RJ09	ALIEAVAQV	42.75	0.11	0.578	TRUE	FALSE	FALSE
A*02:01	ALIEGAGILL	10	1	0.819107	Protein	A0PJ74;Q7RU05;Q99595	ALIEGAILL	47.41	0.201	0.626	TRUE	FALSE	FALSE
A*02:01	ALIEGVGILL	10	2	0.833102	Protein	O60830;O60830-2;V9GYS0	ALIEGVILL	23.59	0.077	0.348	TRUE	FALSE	FALSE
A*02:01	ALIEKLVEL	9	15	0.955439	Protein	Q14181;A0A3B3ITS5	ALIEKLVEL	4.87	0.002	0.031	TRUE	FALSE	FALSE
A*02:01	ALIENLTHQI	10	4	0.965967	Protein	Q6PFW1-4;B7WPL9;Q6PFW1-6;Q6PFW1-3;Q6PFW1	ALIENLHQI	29.08	0.109	0.428	TRUE	FALSE	FALSE
A*02:01	ALIEVPDGFTA	11	1	0.757831	Protein	A6NKB8;Q7RU04;C9JMZ3;Q9H4A4	ALIEVPFTA	94.74	0.244	1.047	TRUE	FALSE	FALSE
A*02:01	ALILEPSLYTV	11	6	0.900935	Protein	F8VUC5;P61923;F8VXB1;A0A024RB72;F8W651	ALIPSLYTV	18.75	0.154	0.272	TRUE	FALSE	FALSE
A*02:01	ALINDILGELVKL	13	2	0.928668	Protein	Q9C0D7;Q9C0D7-2;E9PP00	ALLGELVKL	164.28	0.787	1.484	TRUE	FALSE	FALSE
A*02:01	ALINNIVEI	9	7	0.841483	Protein	Q75V66	ALINNIVEI	9.5	0.021	0.12	TRUE	FALSE	FALSE
A*02:01	ALINNIVEIRV	11	1	0.848557	Protein	Q75V66	ALINNIVEV	54.53	0.232	0.704	TRUE	FALSE	FALSE
A*02:01	ALIPIPLAVI	10	3	0.901675	Protein	Q9BRW0;P19256;P19256-2;P19256-3;H0YDI1	ALIPIPLAI	66.79	0.52	0.807	TRUE	FALSE	FALSE
A*02:01	ALIQQATTV	9	2	0.795129	Protein	H0Y9R4;P32969;D6RAN4;Q53Z07;A0A2R8Y5Y7	ALIQQATTV	61.02	0.067	0.76	TRUE	FALSE	FALSE
A*02:01	ALISEKLETL	10	3	0.62961	Protein	Q8IXB1-2;Q8IXB1;B3KNK5;B4DP04;Q8N4C5	ALIEKLETL	75.94	0.132	0.887	TRUE	FALSE	FALSE
A*02:01	ALITRIFGV	9	3	0.83331	Protein	Q6YHU6-3;Q6YHU3;H0Y3V5;Q6ZT85;Q6YHU4	ALITRIFGV	3.32	0.018	0.01	TRUE	FALSE	FALSE
A*02:01	ALKDLINEA	9	1	0.823044	Protein	Q6FHF5;Q6FI35;P12004;B4DUA2;Q7Z6A3	ALKDLINEA	167.3	0.169	1.499	TRUE	FALSE	FALSE
A*02:01	ALKELMEIEEV	11	1	0.614209	Protein	C9J2X8;B7Z2M4;A8K7H4;O43929-3;O43929	ALKEEIEEV	224.79	0.419	1.789	FALSE	FALSE	FALSE
A*02:01	ALLADEFAL	9	7	0.879995	Protein	Q8WX92;Q8WX92-2	ALLADEFAL	9.79	0.124	0.126	TRUE	FALSE	FALSE
A*02:01	ALLAELEKI	9	2	0.962168	Protein	Q9P013;A0A024R3C8	ALLAELEKI	34.43	0.075	0.492	TRUE	FALSE	FALSE
A*02:01	ALLAGPLRPA	10	4	0.864056	Protein	Q6IPB9;Q9BWD3	ALLAGPLRA	110	1.079	1.152	TRUE	FALSE	FALSE
A*02:01	ALLAGSEYL	9	3	0.842398	Protein	B4E1K8;O15371-2;O15371-3;O15371	ALLAGSEYL	11.44	0.066	0.154	TRUE	FALSE	FALSE
A*02:01	ALLAGSEYLKL	11	11	0.964495	Protein	O15371;O15371-2;O15371-3;B4E1K8	ALLAGSLKL	210.98	0.511	1.723	TRUE	FALSE	FALSE
A*02:01	ALLAHGTSFLL	11	1	0.647745	Protein	Q9H9Y6;Q6DKI9;Q9BSR4;Q9H9Y6-4;Q9H9Y6-2	ALLGTSFLL	31.7	0.712	0.461	FALSE	FALSE	FALSE
A*02:01	ALLAKILQI	9	8	0.906835	Protein	P78527;P78527-2	ALLAKILQI	17.97	0.023	0.26	TRUE	FALSE	FALSE
A*02:01	ALLALLPEL	9	1	0.918144	Protein	A1A5C4;Q9P2E9-3;A0A087WVV2;F8W7S5;Q9P2E9	ALLALLPEL	6.1	0.025	0.057	TRUE	FALSE	FALSE
A*02:01	ALLAYTLGV	9	10	0.906618	Protein	Q05639;Q5VTE0;Q9H2I7;Q6IPN6;Q53GE9	ALLAYTLGV	3.33	0.058	0.01	TRUE	FALSE	FALSE
A*02:01	ALLDFLWDL	9	1	0.800376	Protein	Q8IYT2;A0A0U1RRB3	ALLDFLWDL	3.7	0.031	0.014	TRUE	FALSE	FALSE
A*02:01	ALLDGRLQV	9	2	0.748386	Protein	A0A0U1RQF0;P49327	ALLDGRLQV	10.92	0.014	0.146	FALSE	FALSE	FALSE
A*02:01	ALLDGRLQVV	10	3	0.643736	Protein	A0A0U1RQF0;P49327	ALLDGLQVV	20.95	0.061	0.302	TRUE	FALSE	FALSE
A*02:01	ALLDIIRSL	9	4	0.82123	Protein	B3KVS0;B3KNI9;O95864-2;O95864;O95864-4	ALLDIIRSL	13.14	0.009	0.177	TRUE	FALSE	FALSE
A*02:01	ALLDKLYAL	9	15	0.938458	Protein	Q9NV31	ALLDKLYAL	3.74	0.004	0.014	TRUE	FALSE	FALSE
A*02:01	ALLDLDSLKKKLFL	14	1	0.805399	Protein	Q8WTV1-3;Q8WTV1	ALLDLDLFL	74.48	1.886	0.875	TRUE	FALSE	FALSE
A*02:01	ALLDNNIGL	9	3	0.813631	Protein	I3L2B0;O75153;K7EIG1	ALLDNNIGL	9.59	0.025	0.122	TRUE	FALSE	FALSE
A*02:01	ALLDPEVLSIFV	12	1	0.736694	Protein	E5RI43;H0YAY3;E9PF32;E5RHH2;E5RIR7	ALLDPEVFV	17.06	0.251	0.245	TRUE	FALSE	FALSE
A*02:01	ALLDQALSNA	10	2	0.848743	Protein	Q9UPN3-2;H3BQK9;H3BPE1;Q9UPN3-3;Q9UPN3-5	ALLDQLSNA	90.16	0.5	1.012	FALSE	FALSE	FALSE
A*02:01	ALLDQALSNARL	12	1	0.932292	Protein	Q9UPN3-2;H3BQK9;H3BPE1;Q9UPN3-3;Q9UPN3-5	ALLDQALSL	242.3	0.549	1.865	FALSE	FALSE	FALSE
A*02:01	ALLDQLHTL	9	6	0.917332	Protein	Q59EE8;B4DYT5;Q9Y6Q9-3;Q9Y6Q9-4;A8K0W8	ALLDQLHTL	4.99	0.002	0.033	TRUE	FALSE	FALSE
A*02:01	ALLDRIVSV	9	12	0.929967	Protein	B4DE72;Q92621;U3KPX2;Q6P486	ALLDRIVSV	3.08	0.001	0.009	TRUE	FALSE	FALSE
A*02:01	ALLDSAHLL	9	8	0.75066	Protein	Q6PK82;O14617-4;O14617;O14617-2;O14617-5	ALLDSAHLL	9.97	0.019	0.13	TRUE	FALSE	FALSE
A*02:01	ALLDSFITI	9	1	0.744568	Protein	Q96C57;F5H7W8;G5EA44;F5H3K2;B4DRA4	ALLDSFITI	6.14	0.016	0.058	TRUE	FALSE	FALSE
A*02:01	ALLDVSNNYGI	11	2	0.652561	Protein	Q8TF46;Q8TF46-2;Q8TF46-4	ALLDVSYGI	36.24	0.52	0.512	TRUE	FALSE	FALSE
A*02:01	ALLDVTPKAV	10	11	0.900321	Protein	A0A024R225;A0A1B0GTW1;A0A3B3ISF1;A0A3B3IU51;A0A024R233	ALLDVTPKV	9.32	0.044	0.116	TRUE	FALSE	FALSE
A*02:01	ALLDWVTSV	9	2	0.854669	Protein	Q9UPN3-2;Q9UPN3;H3BQK9;Q9UPN3-3;E9PNZ4	ALLDWVTSV	2.3	0.001	0.007	FALSE	FALSE	FALSE
A*02:01	ALLDYGAQPVR	11	1	0.437892	Protein	Q96NS5	ALLDYGAQV	330.96	2.967	2.228	FALSE	FALSE	FALSE
A*02:01	ALLEADVNIKL	11	36	0.963587	Protein	G3V480;P61011	ALLDVNIKL	74.36	0.071	0.874	TRUE	FALSE	FALSE
A*02:01	ALLEDEERVVRL	12	1	0.740824	Protein	A0FGR8-2;A0FGR8;A0A087WXU3;H7BXI1;A0FGR8-6	ALLEDVVRL	124.8	0.233	1.246	TRUE	FALSE	FALSE
A*02:01	ALLEDLGKASGL	12	2	0.733669	Protein	Q96S19;A0A087WYU2;Q96S19-3;Q96S19-5	ALLEDLSGL	117.18	0.772	1.197	TRUE	FALSE	FALSE
A*02:01	ALLEENSTPQL	11	6	0.92515	Protein	C9J8B8;Q969S8-2;Q969S8	ALLEETPQL	70.17	0.045	0.838	TRUE	FALSE	FALSE
A*02:01	ALLEEVKAL	9	1	0.934916	Protein	A0A1B0GU96;A0A1B0GUA3;A0A1B0GUH6;A0A1B0GVY9;Q96EK5	ALLEEVKAL	27.86	0.024	0.412	TRUE	FALSE	FALSE
A*02:01	ALLEGLTVV	9	3	0.870622	Protein	P61923;P61923-4;A0A024RB72;P61923-3;F8VXB1	ALLEGLTVV	4.03	0.006	0.018	TRUE	FALSE	FALSE
A*02:01	ALLEGVKNV	9	2	0.945343	Protein	Q8NHM5-2;F6SRV7;Q8NHM5-4;Q8NHM5;Q8NHM5-5	ALLEGVKNV	7.36	0.006	0.078	TRUE	FALSE	FALSE
A*02:01	ALLEKLTEL	9	4	0.943724	Protein	B3KN02;O75165	ALLEKLTEL	6.91	0.004	0.071	TRUE	FALSE	FALSE
A*02:01	ALLEKPGELSL	11	2	0.696253	Protein	B3KPM8;Q8N5C6	ALLEGELSL	129.79	0.079	1.277	TRUE	FALSE	FALSE
A*02:01	ALLELLHEL	9	3	0.954137	Protein	A0A220T1R7;Q8NC56;A0A024RCZ1	ALLELLHEL	3.85	0.002	0.015	TRUE	FALSE	FALSE
A*02:01	ALLELVPWRA	10	2	0.796977	Protein	Q9UPN3-2;E9PHM6;Q03001;Q9UPN3;H3BQK9	ALLEVPWRA	21.66	0.239	0.315	TRUE	FALSE	FALSE
A*02:01	ALLEMDARL	9	2	0.764949	Protein	E9PI41;Q9NPD3	ALLEMDARL	15.51	0.059	0.216	TRUE	FALSE	FALSE
A*02:01	ALLENGIIHHV	11	3	0.898591	Protein	Q70Z35;Q8TCU6-3;Q70Z35-4;A0A2X0SZ31;A0A2X0SFH1	ALLENIHHV	25.34	0.06	0.376	FALSE	FALSE	FALSE
A*02:01	ALLENMEGLFL	11	3	0.760493	Protein	P61923;F8VYZ4;F8VYK5;F8VXR1;P61923-3	ALLEEGLFL	54.93	0.243	0.707	TRUE	FALSE	FALSE
A*02:01	ALLEQVNAL	9	1	0.811617	Protein	X6RLR1;X6RA56;O75935-2;O75935	ALLEQVNAL	9.55	0.01	0.121	TRUE	FALSE	FALSE
A*02:01	ALLERGYSL	9	7	0.778167	Non-coding	NR_029416-7;NR_029416-6;NR_029416-4;NR_029417-6;NR_029417-7	ALLERGYSL	10.92	0.023	0.146	FALSE	FALSE	FALSE
A*02:01	ALLESVLRHV	10	1	0.783964	Protein	O75064	ALLESVLHV	12.92	0.068	0.174	TRUE	FALSE	FALSE
A*02:01	ALLETASPRKL	11	1	0.820494	Protein	Q96BT3-2;A8K662;H3BN05;H3BMP6;H3BQS6	ALLETASKL	235.33	0.61	1.835	FALSE	FALSE	FALSE
A*02:01	ALLETNPYL	9	4	0.9117	Protein	O96005-4;O96005-3;A0A0S2Z3H2;O96005;A0A0S2Z3H6	ALLETNPYL	5.01	0.008	0.034	TRUE	FALSE	FALSE
A*02:01	ALLETNPYLL	10	1	0.853331	Protein	O96005-4;O96005-3;A0A0S2Z3H2;O96005;A0A0S2Z3H6	ALLETNPYL	12.83	0.085	0.173	TRUE	FALSE	FALSE
A*02:01	ALLETVNRL	9	8	0.955508	Protein	D3DX70;Q8IWJ2;B8ZZW2	ALLETVNRL	17.71	0.015	0.256	TRUE	FALSE	FALSE
A*02:01	ALLGDLTKA	9	8	0.914839	Protein	Q05D48;Q92973-3;Q92973-2;A0A075B780;O14787-2	ALLGDLTKA	28.81	0.064	0.425	TRUE	FALSE	FALSE
A*02:01	ALLGGNVRMML	11	1	0.595913	Protein	B4DH39;O60488;Q8TAF6;O60488-2;H0Y9A0	ALLGGNVRL	138.84	0.258	1.335	TRUE	FALSE	FALSE
A*02:01	ALLGILQHV	9	9	0.952167	Protein	Q8IVD9;B0FTY2	ALLGILQHV	4.39	0.004	0.025	TRUE	FALSE	FALSE
A*02:01	ALLGKIEKV	9	8	0.924715	Protein	Q10471-2;Q10471;G3V1S6;B7Z6K2;A0A1L7NY50	ALLGKIEKV	9.73	0.004	0.125	TRUE	FALSE	FALSE
A*02:01	ALLGKLDAINV	11	1	0.659667	Protein	Q59GT6;Q6IB63;P53611	ALLGKLINV	43.42	0.21	0.584	TRUE	FALSE	FALSE
A*02:01	ALLGQTFSL	9	1	0.763023	Protein	A8K5G0;Q8IX01-4;M0R3F6;M0R2Z9;Q8IX01	ALLGQTFSL	5.42	0.013	0.044	TRUE	FALSE	FALSE
A*02:01	ALLGRIPSA	9	1	0.768562	Protein	H0YH81;F8W0P7;Q0QEN7;F8W079;H0YI37	ALLGRIPSA	12.5	0.028	0.169	FALSE	FALSE	FALSE
A*02:01	ALLGSAFQL	9	2	0.895058	Protein	Q96MG2	ALLGSAFQL	8.07	0.034	0.091	FALSE	FALSE	FALSE
A*02:01	ALLKGLAAV	9	1	0.758284	Protein	Q8NB14;Q9P2H5-2;H0Y9H5;E9PRM2;Q8NB14-2	ALLKGLAAV	4.06	0.02	0.018	TRUE	FALSE	FALSE
A*02:01	ALLLRLFTI	9	1	0.73002	Protein	O75717-2;B3KMC2;B3KMD2;O75717;Q05DR3	ALLLRLFTI	14.9	0.292	0.203	FALSE	FALSE	FALSE
A*02:01	ALLLWKPVTV	10	1	0.820312	Protein	Q8TEQ8	ALLWKPVTV	33.51	0.419	0.482	FALSE	FALSE	FALSE
A*02:01	ALLNAILHSA	10	3	0.857476	Protein	Q9H8H0	ALLNILHSA	42.39	0.529	0.574	TRUE	FALSE	FALSE
A*02:01	ALLNGEYLL	9	3	0.830842	Protein	U3KQC1;A0A0A0MQU0;K7EKX5;K7EIR0;Q9BV38	ALLNGEYLL	9.37	0.058	0.117	TRUE	FALSE	FALSE
A*02:01	ALLNILSEV	9	1	0.798865	Protein	B3KSS1;A0AVT1;A0A024RDB0;A0AVT1-2	ALLNILSEV	3.85	0.013	0.015	TRUE	FALSE	FALSE
A*02:01	ALLNTINYL	9	4	0.898809	Protein	A0A024R223;Q96RL7-2;A0A024R238;B3KW31;Q96RL7-3	ALLNTINYL	8.57	0.043	0.099	TRUE	FALSE	FALSE
A*02:01	ALLNVELEL	9	5	0.872533	Protein	Q99832;Q99832-2;B7Z1C9;Q99832-3;B7Z7I4	ALLNVELEL	15.27	0.043	0.211	TRUE	FALSE	FALSE
A*02:01	ALLPDLPAL	9	3	0.932637	Protein	B3KY51;Q8NC60	ALLPDLPAL	7.07	0.007	0.074	TRUE	FALSE	FALSE
A*02:01	ALLPLLERV	9	3	0.853255	Protein	Q6ZNJ1;H0Y764;Q6ZNJ1-3;Q6ZNJ1-2	ALLPLLERV	7.72	0.008	0.084	TRUE	FALSE	FALSE
A*02:01	ALLPQNHKL	9	1	0.812743	Protein	A0A024R0R6;A0A087WUE9;Q4LE61;Q92797;B7Z6F7	ALLPQNHKL	44.57	0.017	0.594	TRUE	FALSE	FALSE
A*02:01	ALLPSSPTL	9	3	0.875887	Protein	Q92994-8;Q92994-9;Q92994;B3KWA2;A0A024R6P8	ALLPSSPTL	19.84	0.014	0.287	TRUE	FALSE	FALSE
A*02:01	ALLQEIVNI	9	2	0.79111	Protein	Q92600;B2RE59;Q92600-2;D5MQE1;Q92600-3	ALLQEIVNI	19.87	0.026	0.287	TRUE	FALSE	FALSE
A*02:01	ALLQQPLFL	9	4	0.887302	Protein	Q8N370;Q8WUU1;Q8NBW0;Q8N370-4;Q8N370-3	ALLQQPLFL	36.33	0.053	0.513	TRUE	FALSE	FALSE
A*02:01	ALLQQVHSA	9	1	0.827357	Protein	Q86XN7;B7Z607;Q86XN7-2	ALLQQVHSA	42.48	0.048	0.575	TRUE	FALSE	FALSE
A*02:01	ALLQRLEAL	9	8	0.872311	Protein	Q9P0R6;A0A024R6P6	ALLQRLEAL	27.58	0.066	0.408	TRUE	FALSE	FALSE
A*02:01	ALLRVTPFI	9	4	0.823333	Protein	Q8N4H5	ALLRVTPFI	10.12	0.152	0.132	TRUE	FALSE	FALSE
A*02:01	ALLSAAFLL	9	1	0.824778	Non-coding	NR_144934-1;NR_144934-2;NR_144935-2;NR_144933-1;NR_144935-1	ALLSAAFLL	5.97	0.144	0.055	TRUE	FALSE	FALSE
A*02:01	ALLSAVTRL	9	6	0.958826	Protein	P26232-2;P35221;E5RIB1;P26232;A0A384MDY0	ALLSAVTRL	28.98	0.044	0.427	TRUE	FALSE	FALSE
A*02:01	ALLSGIVSI	9	5	0.900986	Protein	Q13505-2;A0A0C4DFQ1;Q13505;Q13505-3	ALLSGIVSI	6.51	0.013	0.064	TRUE	FALSE	FALSE
A*02:01	ALLSGLREA	9	3	0.79172	Protein	A8K2R3;R4GMP9;R4GMQ1;O60341;O60341-2	ALLSGLREA	35.69	0.141	0.506	TRUE	FALSE	FALSE
A*02:01	ALLSLDPAAV	10	5	0.853415	Protein	P78527;P78527-2	ALLSDPAAV	23.07	0.349	0.34	TRUE	FALSE	FALSE
A*02:01	ALLSLHFLFV	10	1	0.944827	Protein	F8W050;P55160;P55160-2	ALLSHFLFV	10.78	0.8	0.144	TRUE	FALSE	FALSE
A*02:01	ALLSMTFPL	9	1	0.800292	Protein	D6RC06	ALLSMTFPL	3.51	0.256	0.011	FALSE	FALSE	FALSE
A*02:01	ALLSRLEQI	9	8	0.774245	Protein	Q9UKM9;Q53GL6;A8K4T9;Q5QPM0;Q5QPL9	ALLSRLEQI	23.44	0.049	0.346	TRUE	FALSE	FALSE
A*02:01	ALLSVLPTI	9	2	0.81498	Protein	P45974;P45974-2;F5H571;A0A140VJZ1	ALLSVLPTI	5.43	0.02	0.044	FALSE	FALSE	FALSE
A*02:01	ALLTGIISKA	10	4	0.925697	Protein	U3KPX2;Q6DKH1;Q6P486;B4DE72;Q92621	ALLTGIIKA	120.7	0.458	1.22	TRUE	FALSE	FALSE
A*02:01	ALLTVVSQV	9	1	0.84009	Protein	K7EIQ6;Q9Y5S1;B3KMH7	ALLTVVSQV	11.79	0.021	0.159	TRUE	FALSE	FALSE
A*02:01	ALLTYLEQV	9	3	0.836859	Protein	Q96SM3;Q8N2F1;B4DZY4	ALLTYLEQV	4.34	0.01	0.024	TRUE	FALSE	FALSE
A*02:01	ALLVRLQEV	9	4	0.60692	Non-coding	NR_104181-4;NR_104181-2;NR_104181-1;NR_104181-5;NR_104181-3	ALLVRLQEV	10.55	0.027	0.14	TRUE	FALSE	FALSE
A*02:01	ALMADMVYV	9	1	0.780972	Protein	Q9H8B9;A4FU77;O75643	ALMADMVYV	2.24	0.018	0.007	TRUE	FALSE	FALSE
A*02:01	ALMDLDVKKMPL	12	2	0.699523	Protein	Q9Y6F1;A0A024R2X5;Q59HF6;Q9Y6F1-2;C9J9C7	ALMDLDVKL	11.4	0.288	0.154	TRUE	FALSE	FALSE
A*02:01	ALMEEILKL	9	9	0.967723	Protein	Q96G01;Q8TD16-2;A8MVZ6;Q96G01-3;Q96G01-4	ALMEEILKL	5.95	0.003	0.055	TRUE	FALSE	FALSE
A*02:01	ALMELFPKL	9	15	0.967723	Protein	O75691	ALMELFPKL	4.2	0.005	0.02	TRUE	FALSE	FALSE
A*02:01	ALMEQVAHQTI	11	8	0.942699	Protein	K7EL68;Q6FG59;Q16543;A0A024R7B7;K7EKQ2	ALMEQVQTI	70.48	0.206	0.841	TRUE	FALSE	FALSE
A*02:01	ALMGLSAQL	9	1	0.673095	Protein	A0A2X0U4N6;Q6XZF7	ALMGLSAQL	10	0.05	0.13	FALSE	FALSE	FALSE
A*02:01	ALMHLLLRL	9	1	0.654697	Protein	H7C0T2;Q6GPH6-2;Q6GPH6;Q6GPH6-3	ALMHLLLRL	8.46	0.049	0.097	FALSE	FALSE	FALSE
A*02:01	ALMPQLVQL	9	10	0.945309	Protein	F8VWT9;B7ZKU4;B7ZKU8;Q9Y4D8-4;J3KPF0	ALMPQLVQL	6.1	0.003	0.057	TRUE	FALSE	FALSE
A*02:01	ALMPVLNQV	9	14	0.953183	Protein	Q5RKV6	ALMPVLNQV	3.6	0.003	0.012	TRUE	FALSE	FALSE
A*02:01	ALMYESEKVGV	11	1	0.754686	Protein	O95721	ALMSEKVGV	61.08	0.59	0.761	FALSE	FALSE	FALSE
A*02:01	ALNEEAGRLLL	11	9	0.958983	Protein	K7EPJ1;Q2QD04;Q16763;Q6NXQ4	ALNEEALLL	911.14	0.605	3.866	TRUE	FALSE	FALSE
A*02:01	ALNEKLVNL	9	10	0.935343	Protein	B4DEW9;B4DMT5;O00303;B3KSH1	ALNEKLVNL	15.19	0.008	0.209	TRUE	FALSE	FALSE
A*02:01	ALNELLQHV	9	6	0.964398	Protein	Q9Y490;A0A1S5UZ07	ALNELLQHV	6.1	0.004	0.057	TRUE	FALSE	FALSE
A*02:01	ALNENINQV	9	2	0.938732	Protein	Q9BZ23-4;A4FU43;Q9BZ23;A0A2R8YF29;Q6P1K9	ALNENINQV	6.99	0.004	0.073	FALSE	FALSE	FALSE
A*02:01	ALNEQIARL	9	7	0.936667	Protein	Q05DQ6;A8K031;O14777	ALNEQIARL	25.22	0.017	0.374	TRUE	FALSE	FALSE
A*02:01	ALNNLLHSL	9	1	0.774763	Protein	Q96Q15-2;V9H0F5;J3KRA9;I3L400;H3BQN7	ALNNLLHSL	14.66	0.023	0.199	TRUE	FALSE	FALSE
A*02:01	ALNSKILSV	9	8	0.940554	Protein	Q96NW4	ALNSKILSV	12.43	0.009	0.168	TRUE	FALSE	FALSE
A*02:01	ALNYLQLLV	9	1	0.840988	Protein	Q92797;A0A087WUE9;Q4LE61;B7Z6F7;A0A024R0R6	ALNYLQLLV	20.87	0.272	0.301	FALSE	FALSE	FALSE
A*02:01	ALPEIFTEL	9	5	0.91962	Protein	Q2VIR3-2;P41091;Q2VIR3	ALPEIFTEL	15.5	0.018	0.216	TRUE	FALSE	FALSE
A*02:01	ALPPVLTTV	9	1	0.843399	Protein	H0YBM7;H0YBJ5;Q6PKG0;A0A0B4J210	ALPPVLTTV	8.98	0.005	0.109	TRUE	FALSE	FALSE
A*02:01	ALPVSLPQI	9	2	0.817876	Protein	Q9UHI6;Q8TDR3;E9PJ60;Q8IYV2;Q8NEH0	ALPVSLPQI	76.98	0.165	0.895	FALSE	FALSE	FALSE
A*02:01	ALQDIGKNIYTI	12	2	0.888634	Protein	B2RAR2;H3BUR4;Q9ULX3	ALQDNIYTI	198.2	1.419	1.662	TRUE	FALSE	FALSE
A*02:01	ALQDVPLSSV	10	8	0.939722	Protein	Q9Y3B7;Q9Y3B7-3;Q53G19;H0YCD5;Q9Y3B7-2	ALQDVPLSV	24.05	0.071	0.356	FALSE	FALSE	FALSE
A*02:01	ALQEAIDAIFL	11	1	0.686566	Protein	Q14008;Q14008-2;Q14008-3	ALQEAIIFL	104.23	0.296	1.114	TRUE	FALSE	FALSE
A*02:01	ALQEASEAYLV	11	2	0.729168	Protein	A0A1X8XL64;K7EK07;A0A2R8Y7G9;A8K4Y7;P84243	ALQEASYLV	95.58	0.517	1.053	TRUE	FALSE	FALSE
A*02:01	ALQEKLWNV	9	6	0.934207	Protein	Q96HW7-4;A8K4A1;Q96HW7	ALQEKLWNV	3.24	0.004	0.01	TRUE	FALSE	FALSE
A*02:01	ALQEMVHQV	9	6	0.948554	Protein	Q14511-3;Q14511;A0A024QZV9;A0A087WUD2	ALQEMVHQV	5.14	0.002	0.036	TRUE	FALSE	FALSE
A*02:01	ALQERLDGL	9	3	0.826828	Protein	F8W118;F5H4R6;F8VV59;B7Z5H0;A0A024RBE6	ALQERLDGL	64.9	0.168	0.791	TRUE	FALSE	FALSE
A*02:01	ALQESLVQI	9	1	0.833091	Protein	Q6IAX9;P08240;P08240-2;A0A024R3M0	ALQESLVQI	15.36	0.017	0.213	TRUE	FALSE	FALSE
A*02:01	ALQPGTLQLI	10	5	0.87993	Protein	Q9NUK0-3;B1AKI2;Q9NUK0-5;B1AKI5;B1AKI6	ALQPGTLQI	501.04	0.572	2.808	TRUE	FALSE	FALSE
A*02:01	ALQSLLHLL	9	7	0.964398	Protein	B3KWR2;B3KXZ2;P52294;Q5BKZ2	ALQSLLHLL	21.05	0.059	0.304	TRUE	FALSE	FALSE
A*02:01	ALQTIQLFL	9	3	0.863214	Protein	E9PHM6;Q03001;Q03001-8;Q03001-14;F8W9J4	ALQTIQLFL	38.3	0.161	0.534	TRUE	FALSE	FALSE
A*02:01	ALQTKLETL	9	3	0.710964	Protein	O15083;X6RM00;G8JLD3;A0A0U1RQM4;Q8IUD2	ALQTKLETL	186.83	0.129	1.605	TRUE	FALSE	FALSE
A*02:01	ALQTKLVYL	9	1	0.784253	Protein	F8W1K6;O60486;B4DHQ7	ALQTKLVYL	27.93	0.049	0.413	FALSE	FALSE	FALSE
A*02:01	ALRDVSEEL	9	3	0.859055	Protein	P40222	ALRDVSEEL	127.03	0.124	1.26	TRUE	FALSE	FALSE
A*02:01	ALRVFVESV	9	4	0.780644	Protein	P21283;E7EV59;A0A024R9I0;A8KA87;A0A0U1RR16	ALRVFVESV	137.92	0.475	1.329	TRUE	FALSE	FALSE
A*02:01	ALSAPPPLI	9	1	0.894701	Protein	B4DLG0;A0A2R8Y8C6;A0A2R8Y568;Q8WXX7-2;Q8WXX7-5	ALSAPPPLI	178.59	0.172	1.562	FALSE	FALSE	FALSE
A*02:01	ALSASLITV	9	1	0.831101	Protein	Q9NP87-3	ALSASLITV	9.17	0.033	0.113	TRUE	FALSE	FALSE
A*02:01	ALSDHHIYL	9	3	0.759003	Protein	J3KPS3;P04075;H3BPS8;P04075-2;V9HWN7	ALSDHHIYL	7.15	0.011	0.075	TRUE	FALSE	FALSE
A*02:01	ALSDIFQAV	9	4	0.823453	Protein	O60443-3;C9JSR4;A0A024RA58;A4FTY0;H7C147	ALSDIFQAV	4.75	0.006	0.029	TRUE	FALSE	FALSE
A*02:01	ALSDSIHTV	9	10	0.929392	Protein	F8VZQ2;B3KPI0;Q9UKN5;H0YIF6;A0A024RBM7	ALSDSIHTV	4.94	0.002	0.032	TRUE	FALSE	FALSE
A*02:01	ALSDYDLVL	9	3	0.79027	Protein	P63096-2;A0A3B3ITM0;P63096;P08754	ALSDYDLVL	23.02	0.102	0.339	TRUE	FALSE	FALSE
A*02:01	ALSEELVQL	9	8	0.89232	Protein	D3DRX6;M1VKJ2;M1V490;M1VPF9;C1PHA2	ALSEELVQL	14.98	0.008	0.205	TRUE	FALSE	FALSE
A*02:01	ALSEKIVSV	9	7	0.892027	Protein	F8W9X7;Q567U6	ALSEKIVSV	5.26	0.002	0.039	TRUE	FALSE	FALSE
A*02:01	ALSELATAV	9	5	0.873535	Protein	Q09GN0;Q9BWL3;Q9BWL3-4;X6R6S3;Q9BWL3-2	ALSELATAV	11.64	0.037	0.157	FALSE	FALSE	FALSE
A*02:01	ALSELIILT	9	1	0.826398	Protein	Q16850-2;Q16850;A0A0C4DFL7;B3KRC6	ALSELIILT	54.3	0.251	0.702	TRUE	FALSE	FALSE
A*02:01	ALSEMVEYI	9	8	0.924636	Protein	Q13362;G3V2U3;Q13362-2;Q96L52;Q13362-3	ALSEMVEYI	7.15	0.034	0.075	TRUE	FALSE	FALSE
A*02:01	ALSEVSLRL	9	1	0.912646	Protein	Q9H7X0-5;I3L4T5;I3L1T4;I3L1L7;I3L153	ALSEVSLRL	20.48	0.026	0.296	FALSE	FALSE	FALSE
A*02:01	ALSEVTAAL	9	2	0.751244	Protein	V5J3L2;H0YDB2;Q13586;E9PNJ4;G0XQ39	ALSEVTAAL	8.34	0.024	0.095	FALSE	FALSE	FALSE
A*02:01	ALSGLAVRL	9	5	0.954269	Protein	A0A0C4DGP1;Q96HG1;P0DMW5;P0DMW4	ALSGLAVRL	72.91	0.122	0.861	TRUE	FALSE	FALSE
A*02:01	ALSKEGIVAL	10	1	0.766683	Protein	P40227-2;B2R9K8;B4DPJ8;P40227;Q59ET3	ALSEGIVAL	61.94	0.133	0.768	TRUE	FALSE	FALSE
A*02:01	ALSNLEVKL	9	15	0.96661	Protein	Q86UX7-2;Q86UX7	ALSNLEVKL	80.14	0.074	0.924	TRUE	FALSE	FALSE
A*02:01	ALSNSDVIRQV	11	1	0.775129	Protein	Q5LJA9;Q9Y5K5-2;B2RB07;B4DW59;H0Y6Y4	ALSDVIRQV	525.29	0.386	2.878	TRUE	FALSE	FALSE
A*02:01	ALSPINIQL	9	2	0.713692	Protein	O95876;H7BZ13;B3KMT8;O95876-3;E9PFG9	ALSPINIQL	16.08	0.01	0.227	FALSE	FALSE	FALSE
A*02:01	ALSQINTKL	9	8	0.967723	Protein	C9JZK8;O95825;A0A0C4DG14;F8WF64;O95825-2	ALSQINTKL	172.86	0.106	1.531	TRUE	FALSE	FALSE
A*02:01	ALSSLIHAL	9	8	0.964398	Protein	Q53T09;P13010	ALSSLIHAL	13.83	0.023	0.188	TRUE	FALSE	FALSE
A*02:01	ALSSLLVFL	9	3	0.780922	Protein	A0A024R7M9;Q9HBW0	ALSSLLVFL	8.57	0.059	0.099	TRUE	FALSE	FALSE
A*02:01	ALSSVIKEL	9	7	0.959931	Protein	Q08AG7	ALSSVIKEL	99.4	0.072	1.08	TRUE	FALSE	FALSE
A*02:01	ALSTLALYV	9	6	0.857507	Protein	Q9BVK8-2;Q9BVK8	ALSTLALYV	8.09	0.123	0.091	TRUE	FALSE	FALSE
A*02:01	ALTELLAKI	9	12	0.967723	Protein	A0A3B3IT44;P30279;Q53ER2	ALTELLAKI	25.57	0.069	0.379	TRUE	FALSE	FALSE
A*02:01	ALTERLALI	9	3	0.931862	Protein	A0A024RDL9;Q53EY1;C9JBI3;P78330;A0A024RDL3	ALTERLALI	61.01	0.333	0.76	TRUE	FALSE	FALSE
A*02:01	ALTEYTLYL	9	2	0.826086	Protein	B4DK32;Q14139;Q14139-2	ALTEYTLYL	4.36	0.012	0.024	TRUE	FALSE	FALSE
A*02:01	ALTGIPLPLI	10	2	0.924234	Protein	E7ESI2;A0A024RB77;B4DDL9;P24941;P24941-2	ALTGPLPLI	96	1.185	1.056	TRUE	FALSE	FALSE
A*02:01	ALTGYLHTI	9	4	0.949907	Protein	Q9NYY8;B3KMB8;A0A024R419;Q9NYY8-2	ALTGYLHTI	10.33	0.041	0.136	FALSE	FALSE	FALSE
A*02:01	ALTPVVVTL	9	6	0.835588	Protein	F8VXD2;Q6LC83;F8VWX7;P11802;P11802-2	ALTPVVVTL	23.81	0.012	0.352	TRUE	FALSE	FALSE
A*02:01	ALTSLLKTV	9	1	0.901675	Protein	B4DDL1;B4DS96;O43747;O43747-2;B3KXW5	ALTSLLKTV	46.81	0.105	0.619	TRUE	FALSE	FALSE
A*02:01	ALTSVVVTL	9	9	0.879128	Protein	Q00534	ALTSVVVTL	25.18	0.03	0.373	TRUE	FALSE	FALSE
A*02:01	ALTWLIPTL	9	2	0.838071	Non-coding	NR_052016-3;NR_052016-1	ALTWLIPTL	15.85	0.089	0.223	TRUE	FALSE	FALSE
A*02:01	ALVDHVAEL	9	10	0.954163	Protein	Q6ZNK5;B0I1T2-4;B0I1T2-3;B0I1T2;A0A3B3IU30	ALVDHVAEL	7.26	0.006	0.077	TRUE	FALSE	FALSE
A*02:01	ALVDQLWKL	9	5	0.967723	Protein	B3KMD8;Q6P1X5;B3KMH9;A0A024R9E6;H0YEX2	ALVDQLWKL	4.76	0.005	0.029	TRUE	FALSE	FALSE
A*02:01	ALVDQRELYL	10	8	0.907873	Protein	A0A0B4J286;H3BPN3;H3BUK6;A0A0B4J294;Q9UL33-2	ALVDQELYL	101.87	0.283	1.098	TRUE	FALSE	FALSE
A*02:01	ALVEKLESL	9	2	0.879799	Protein	Q8NHM5-2;F6SRV7;Q8NHM5-4;Q8NHM5;Q8NHM5-5	ALVEKLESL	12.39	0.009	0.167	TRUE	FALSE	FALSE
A*02:01	ALVESLEYV	9	1	0.845394	Protein	Q6AI22;Q9NU22	ALVESLEYV	3.18	0.007	0.009	TRUE	FALSE	FALSE
A*02:01	ALVESLITV	9	2	0.834662	Protein	A0A1P0AZG4;Q96JN0-3	ALVESLITV	4.28	0.004	0.022	TRUE	FALSE	FALSE
A*02:01	ALVNVQIPL	9	2	0.849512	Protein	Q9NUT2-4;Q8N1X3;Q9NUT2;Q9NUT2-2;C9JYI3	ALVNVQIPL	18.71	0.295	0.271	FALSE	FALSE	FALSE
A*02:01	ALVQDLAKA	9	1	0.815212	Protein	P14635-2;P14635	ALVQDLAKA	73.53	0.206	0.867	TRUE	FALSE	FALSE
A*02:01	ALVQITLPTV	10	1	0.789899	Protein	H0Y7M9;Q9BZQ8;A0A024R978	ALVQTLPTV	24.54	0.394	0.363	TRUE	FALSE	FALSE
A*02:01	ALVSSLHLL	9	1	0.765183	Protein	Q9Y678	ALVSSLHLL	25.44	0.093	0.377	TRUE	FALSE	FALSE
A*02:01	ALVSYLIRL	9	4	0.946481	Protein	Q63HN8-4;A0A0A0MTC1;Q63HN8-6;A0A0A0MTR7;Q63HN8	ALVSYLIRL	12.66	0.041	0.171	TRUE	FALSE	FALSE
A*02:01	ALWDIETGQQTT	12	4	0.806843	Protein	A0A024R056;Q71UM6;P62873;P62873-2;B2R6K4	ALWDGQQTT	1129.53	1.271	4.318	TRUE	FALSE	FALSE
A*02:01	ALWDIETGQQTTT	13	4	0.791058	Protein	A0A024R056;Q71UM6;P62873;P62873-2;B2R6K4	ALWDIQTTT	1575.35	2.482	5.118	TRUE	FALSE	FALSE
A*02:01	ALWDIETGQQTV	12	27	0.852584	Protein	C9JXA5;P62879;E7EP32;C9JIS1;Q6FHM2	ALWDGQQTV	19.25	0.043	0.279	TRUE	FALSE	FALSE
A*02:01	ALWDKLFNL	9	3	0.920822	Protein	D4YW74;A0A0A0MRE3;Q8WXH0-2;G3V5X4;Q8WXH0	ALWDKLFNL	3.19	0.003	0.01	TRUE	FALSE	FALSE
A*02:01	ALWDLAADKQTL	12	4	0.926257	Protein	P35998;C9JLS9;Q75L23;B7Z571;A0A140VK70	ALWDDKQTL	58.93	0.305	0.743	TRUE	FALSE	FALSE
A*02:01	ALWGFFPVL	9	3	0.856075	Protein	A0A024R9K7	ALWGFFPVL	8.11	0.078	0.092	TRUE	FALSE	FALSE
A*02:01	ALWGFFPVLL	10	2	0.846171	Protein	A0A024R9K7	ALWGFPVLL	16.4	0.265	0.233	TRUE	FALSE	FALSE
A*02:01	ALWGGTQPLL	10	2	0.78503	Non-coding	NR_133636-2;NR_133634-1;NR_133635-2	ALWGGTPLL	18.3	0.091	0.265	TRUE	FALSE	FALSE
A*02:01	ALWKGRPLSV	10	5	0.62252	Protein	B4E213;F2Z2W7;Q8IZ69-2;Q8IZ69	ALWKGPLSV	17.99	0.057	0.261	TRUE	FALSE	FALSE
A*02:01	ALWSLPLYL	9	2	0.717819	Protein	Q53XM5;O15287;A0A0S2Z3R2	ALWSLPLYL	4.09	0.015	0.019	TRUE	FALSE	FALSE
A*02:01	ALYASRLYL	9	4	0.926629	Protein	A0A087WUI8;A0A024R482;C9JAH0;Q96IJ6-2;F8WD54	ALYASRLYL	25.56	0.191	0.379	TRUE	FALSE	FALSE
A*02:01	ALYAVIEKA	9	6	0.890223	Protein	O00329;F8W9P4;B4E0L4;A0A2K8FKT1;A0A2K8FKQ1	ALYAVIEKA	47.64	0.091	0.629	FALSE	FALSE	FALSE
A*02:01	ALYDENTKLWYA	12	2	0.77424	Protein	A0A0A0N0M2;Q6P669;Q4LDX3;Q0VGA4;Q8IV82	ALYDELWYA	8.08	0.187	0.091	TRUE	FALSE	FALSE
A*02:01	ALYDNVEKL	9	8	0.967723	Protein	F8WEJ5;P08243;P08243-3;B4DY32;P08243-2	ALYDNVEKL	15.21	0.006	0.21	TRUE	FALSE	FALSE
A*02:01	ALYDPINPDRETL	13	6	0.94809	Protein	B4DMT0;M0QZ02;B4DMR6;Q96AN5	ALYDPIETL	191.63	0.289	1.63	TRUE	FALSE	FALSE
A*02:01	ALYDVRTILL	10	4	0.847595	Protein	B2R4U3;O00762-2;Q5TZN3;O00762-3;O00762	ALYDVTILL	21.93	0.099	0.32	TRUE	FALSE	FALSE
A*02:01	ALYEYQPLQI	10	2	0.858451	Protein	P51948;H0YJ92;P51948-2;A0A024R688;H0YJF2	ALYEQPLQI	25.27	0.09	0.375	TRUE	FALSE	FALSE
A*02:01	ALYGKLLKL	9	3	0.921697	Protein	Q7Z7G8-4;Q8N509;Q7Z7G8;Q7Z7G8-3;Q7Z7G8-6	ALYGKLLKL	15.13	0.013	0.208	TRUE	FALSE	FALSE
A*02:01	ALYGQPLLL	9	6	0.902841	Protein	Q53FJ3;Q08AK7;Q13107;H7C189;A0A024R2T0	ALYGQPLLL	17.79	0.023	0.257	TRUE	FALSE	FALSE
A*02:01	ALYGTIPQI	9	3	0.833993	Protein	B2RDH6;Q96AX1;A0A2R8YF87	ALYGTIPQI	12.65	0.012	0.171	FALSE	FALSE	FALSE
A*02:01	ALYHLAIKL	9	3	0.903279	Protein	Q9UKA4	ALYHLAIKL	42.7	0.065	0.577	TRUE	FALSE	FALSE
A*02:01	ALYLGAKAIQL	11	4	0.832223	Protein	Q2M2R1;A8KAQ7;Q4KMX6;Q9UJX3-2;A5D8X2	ALYAKAIQL	817	0.843	3.65	TRUE	FALSE	FALSE
A*02:01	ALYNDISHMKI	11	3	0.958127	Protein	Q8NI08-2;Q3LID7;H0UI55;Q8N4U9;Q8N3C8	ALYNDIMKI	266.38	0.434	1.958	TRUE	FALSE	FALSE
A*02:01	ALYNWLIQV	9	1	0.533984	Protein	B3KMK3;E9PF10;A0A024R071;O75694;O75694-2	ALYNWLIQV	3.33	0.007	0.01	TRUE	FALSE	FALSE
A*02:01	ALYPGQLVQL	10	7	0.627013	Protein	Q6ZN13;Q9BRR9-3;B3KQ74;A0A2X0SF68;H0YI33	ALYPGLVQL	26.46	0.027	0.393	TRUE	FALSE	FALSE
A*02:01	ALYSELLAV	9	3	0.883713	Protein	E7EMW7;O95071;O95071-2	ALYSELLAV	4.04	0.009	0.018	TRUE	FALSE	FALSE
A*02:01	ALYSKGILL	9	5	0.913983	Protein	E9PF10;A0A024R071;O75694;O75694-2;B4DLT2	ALYSKGILL	51.51	0.087	0.672	TRUE	FALSE	FALSE
A*02:01	ALYTGFSILV	10	2	0.863612	Non-coding	NR_157074-5;NR_157074-2;NR_157074-1	ALYTGSILV	13.06	0.251	0.176	TRUE	FALSE	FALSE
A*02:01	ALYTVIETV	9	1	0.777028	Protein	Q6NUK4-2;Q6NUK4;X5DP57;X5DR89;A8K1R1	ALYTVIETV	10.13	0.014	0.132	TRUE	FALSE	FALSE
A*02:01	AMADAGILRL	10	3	0.942614	Protein	Q9NPU8;Q9P2J5;Q9NVP8;Q9P2J5-3;Q9NVC0	AMADGILRL	74.04	0.22	0.871	FALSE	FALSE	FALSE
A*02:01	AMAPGTVTV	9	3	0.841633	Protein	B7Z6D4;B7Z741;B7Z6K4;B7Z6H1;Q9P243-2	AMAPGTVTV	6.97	0.009	0.072	TRUE	FALSE	FALSE
A*02:01	AMASLGALALL	11	1	0.906584	Non-coding	NR_037927-1	AMLGALALL	62.87	1.583	0.775	TRUE	FALSE	FALSE
A*02:01	AMFDHIPVGV	10	3	0.855249	Protein	Q9Y3I0;B4DNG5;B4DNA0	AMFDHPVGV	4.62	0.027	0.028	TRUE	FALSE	FALSE
A*02:01	AMFDQSQIQEF	11	2	0.687986	Protein	Q71U02;Q53HL1;P24844;P24844-2;O14950	AMFDQIQEF	5537.12	1.605	10.13	FALSE	FALSE	FALSE
A*02:01	AMFENFVSV	9	3	0.780417	Protein	Q09161;A0A024R179	AMFENFVSV	2.67	0.006	0.008	TRUE	FALSE	FALSE
A*02:01	AMFESSQNVLL	11	7	0.951744	Protein	Q9C0E2;F2Z2X4;Q8IVQ8;Q86VC1;Q0VG75	AMFEQNVLL	35.64	0.167	0.505	TRUE	FALSE	FALSE
A*02:01	AMFGKLMTI	9	2	0.887367	Protein	G1UI16;Q29RF7-3;Q29RF7	AMFGKLMTI	6.03	0.024	0.056	TRUE	FALSE	FALSE
A*02:01	AMIDQVLEL	9	2	0.821336	Protein	J3QKL0;Q8WVB3-2;J3KT84;Q8WVB3	AMIDQVLEL	5.63	0.004	0.051	TRUE	FALSE	FALSE
A*02:01	AMIDTEFAKQTSL	13	3	0.957603	Protein	B7Z3S5;Q59FT7;Q15750-2;Q15750;B7Z9N9	AMIDTEFSL	82.09	1.671	0.942	TRUE	FALSE	FALSE
A*02:01	AMLAVLHTV	9	4	0.953179	Protein	F8VQD9;A0A024R128;H3BMZ4;Q9BSB4;F8VVA0	AMLAVLHTV	3.47	0.018	0.011	TRUE	FALSE	FALSE
A*02:01	AMLEEVNYI	9	1	0.824457	Protein	O96020-2;O96020;I6L961;A0A024R9B0	AMLEEVNYI	4.68	0.024	0.028	FALSE	FALSE	FALSE
A*02:01	AMLENASDIKL	11	3	0.967225	Protein	Q8NE71-2;Q2L6I2;Q5STZ8;H0YGW7;A0A1U9X609	AMLESDIKL	262.19	0.307	1.943	TRUE	FALSE	FALSE
A*02:01	AMLGVNPRF	9	1	0.785365	Protein	Q8NBL9;B2RBB2;Q96S52;Q96IR5;Q96S52-2	AMLGVNPRF	1126.01	1.15	4.311	FALSE	FALSE	FALSE
A*02:01	AMLPSITNV	9	7	0.889107	Protein	F2Z2U4;Q9Y4A5-2;Q59FH1;H0Y4W2;Q9Y4A5	AMLPSITNV	5.52	0.005	0.048	TRUE	FALSE	FALSE
A*02:01	AMLTVLHEI	9	8	0.926766	Protein	Q8N3C0-4;Q8N3C0;B4DR60	AMLTVLHEI	6.18	0.046	0.058	TRUE	FALSE	FALSE
A*02:01	AMNDILAQV	9	1	0.760199	Protein	B4DDL1;B4DS96;O43747;O43747-2;B3KXW5	AMNDILAQV	4.31	0.007	0.023	FALSE	FALSE	FALSE
A*02:01	AMNISVPQV	9	2	0.810937	Protein	M5FMX3;Q9Y2K2-7;Q9Y2K2;A1A5A9;H7C3X8	AMNISVPQV	30.64	0.066	0.448	TRUE	FALSE	FALSE
A*02:01	AMPALAPPEV	10	1	0.756797	Protein	B5MDF5;B4DV51;J3KQE5;P62826;F5H018	AMALAPPEV	112.35	1.012	1.167	FALSE	FALSE	TRUE
A*02:01	AMPPPPPQGV	10	1	0.603051	Protein	O60216;E5RFZ5;A0A024R9J0	AMPPPPPQV	526.8	0.231	2.882	TRUE	FALSE	FALSE
A*02:01	AMQSRLATL	9	1	0.634521	Non-coding	NR_036454-4;NR_036454-1;NR_036454-3;NR_036454-2;NR_036454-10	AMQSRLATL	98.76	0.373	1.076	FALSE	FALSE	FALSE
A*02:01	AMSNLVPPVEL	11	1	0.640836	Protein	P63092;S4R3E3;A0A0S2Z3S5;B0AZR9;S4R3V9	AMSNPPVEL	165.9	0.99	1.492	TRUE	FALSE	FALSE
A*02:01	AMTLVNKTL	9	5	0.935195	Protein	Q2V2M9-3;K7ER94;Q2V2M9-2;Q2V2M9;Q2V2M9-4	AMTLVNKTL	1331.84	1.522	4.696	TRUE	FALSE	FALSE
A*02:01	AMWEHPITA	9	6	0.810972	Protein	H3BU63;H3BPW5;H3BQB0;H3BRQ0;Q96CD2-2	AMWEHPITA	5.67	0.007	0.051	TRUE	FALSE	FALSE
A*02:01	AQFGYYFRV	9	2	0.868468	Protein	E9PHA6;P43246;Q53RU4;V9H068;B4DL39	AQFGYYFRV	4.73	0.104	0.029	TRUE	FALSE	FALSE
A*02:01	AQGGVLPNI	9	2	0.847365	Non-coding	NR_027716-2	AQGGVLPNI	176.47	0.498	1.551	FALSE	FALSE	FALSE
A*02:01	AQMDYQLRL	9	2	0.937566	Protein	Q8N594;M0R044;W4VSR2;M0R189;Q8N594-2	AQMDYQLRL	25.33	0.063	0.376	TRUE	FALSE	FALSE
A*02:01	AQRLKAVIV	9	1	0.455375	Non-coding	NR_104244-4;NR_104244-7;NR_104244-5;NR_104244-6;NR_104244-2	AQRLKAVIV	13583.8	7.703	18.514	FALSE	FALSE	TRUE
A*02:01	ASAIAAALAA	10	1	0.788874	Protein	Q96LR6	AAIAAALAA	10444.6	24.792	15.161	FALSE	FALSE	TRUE
A*02:01	ATALGTVALAL	11	4	0.774674	Non-coding	NR_138423-5;NR_138422-6;NR_138421-6;NR_138421-5;NR_138424-5	ALGTVALAL	3428.18	6.015	7.739	FALSE	FALSE	FALSE
A*02:01	ATMPVVPSV	9	8	0.893175	Non-coding	NR_163192-3	ATMPVVPSV	9.72	0.015	0.125	TRUE	FALSE	FALSE
A*02:01	ATYVFLHTV	9	1	0.869325	Protein	Q53FV1;F8VXD5	ATYVFLHTV	28.29	0.175	0.418	TRUE	FALSE	FALSE
A*02:01	AVANIVNSV	9	2	0.738304	Protein	Q9BRQ8;Q9BRQ8-2	AVANIVNSV	56.1	0.122	0.718	TRUE	FALSE	FALSE
A*02:01	AVERGLLSV	9	1	0.65031	Non-coding	NR_105000-1	AVERGLLSV	2137.15	1.522	6.005	FALSE	FALSE	TRUE
A*02:01	AVIDVGINRV	10	5	0.837476	Protein	B4DY35;P13995-2;B2R7W0;P13995;B9A062	AVIDGINRV	396.09	0.476	2.463	FALSE	FALSE	FALSE
A*02:01	AVLAAVTEV	9	3	0.84343	Protein	Q5JTH9;Q5JTH9-2;Q5JTH9-3;B3KMR5;A0A087X1U8	AVLAAVTEV	38.63	0.155	0.537	FALSE	FALSE	FALSE
A*02:01	AVLGFSFRL	9	3	0.917933	Protein	Q6ST48;Q9BW92;Q9H045;Q9BW92-2;U3KQG0	AVLGFSFRL	26.51	0.232	0.393	FALSE	FALSE	FALSE
A*02:01	AVLHLLLSV	9	1	0.708662	Protein	B4DT46;P13498;H3BR52;H3BNP7	AVLHLLLSV	14.86	0.152	0.202	FALSE	FALSE	FALSE
A*02:01	AVLPFSPAL	9	1	0.914098	Protein	Q99638;F5H4F1	AVLPFSPAL	84.72	0.155	0.966	TRUE	FALSE	FALSE
A*02:01	AVLQGKLAEV	10	3	0.57971	Protein	Q9UPN3-2;Q9UPN3;H3BQK9;Q9UPN3-3;H3BPE1	ALQGKLAEV	84.93	0.469	0.968	FALSE	FALSE	FALSE
A*02:01	AVMEQIPEI	9	5	0.907368	Protein	B3KNC6;H0Y3W3;Q9HAV4;A8K5Y7;B3KPQ5	AVMEQIPEI	8.51	0.01	0.098	TRUE	FALSE	FALSE
A*02:01	AVRALKQLVLL	11	1	0.480322	Protein	A0A384DVU0;Q8IY17-5;Q8IY17-2;Q8IY17;Q8IY17-3	AVLKQLVLL	8159.83	4.968	12.856	FALSE	FALSE	FALSE
A*02:01	DIETGQQTV	9	4	0.884711	Protein	P62879;E7EP32;C9JXA5;Q6FHM2;C9JIS1	DIETGQQTV	29478.8	12.022	41.918	TRUE	FALSE	TRUE
A*02:01	DIGDTIIYL	9	6	0.750276	Protein	Q9NPU8;Q9P2J5;Q9P2J5-3;Q9P2J5-2;B4DER1	DIGDTIIYL	4366.87	2.205	8.863	FALSE	FALSE	FALSE
A*02:01	DPRSLTLYV	9	2	0.755849	Protein	Q9NTJ4-4;H3BSE5;Q9NTJ4-3;Q9NTJ4;H3BQH9	DPRSLTLYV	31655.8	23.782	46.891	FALSE	FALSE	TRUE
A*02:01	DSFLILYQ	8	1	0.774005	Protein	K7EKE9	DSFLILYQ-	40656.1	75	75.031	FALSE	FALSE	FALSE
A*02:01	DSSDIGWVLEL	11	1	0.533882	Protein	A6ND36-2;A6ND36	DSSDIVLEL	19027.2	19.922	24.834	FALSE	FALSE	FALSE
A*02:01	DSYVGDEAQSK	11	2	0.965404	Protein	E7EVS6;Q53G76;A1E282;P60709;Q8WVW5	DSYDEAQSK	42763.6	55.455	83.243	FALSE	TRUE	TRUE
A*02:01	DTNADKQLSF	10	12	0.956979	Protein	B2R4M6;P06702	DTADKQLSF	41005.5	32.556	76.391	TRUE	FALSE	TRUE
A*02:01	DTNADKQLSFEE	12	1	0.694525	Protein	B2R4M6;P06702	DTNADSFEE	43917.1	90	87.671	FALSE	FALSE	TRUE
A*02:01	DTNADKQLSFEEF	13	3	0.820416	Protein	B2R4M6;P06702	DTNADFEEF	42722.9	87.5	83.083	TRUE	FALSE	TRUE
A*02:01	EASAVFLTAV	10	1	0.691627	Non-coding	NR_135815-1	EASAVFLTV	3926.9	18.048	8.355	FALSE	FALSE	TRUE
A*02:01	EILARGILL	9	3	0.725242	Non-coding	NR_146933-3;NR_146933-4;NR_146933-2;NR_146932-4;NR_146932-3	EILARGILL	10671.8	6.815	15.401	FALSE	FALSE	TRUE
A*02:01	EKELVPEV	8	1	0.736918	Protein	Q9UL09;P78559;A8K4T7;Q504X9;P78559-2	N/A	41253.4	38.1	77.349	FALSE	FALSE	FALSE
A*02:01	EKTEILAV	8	1	0.839498	Protein	E7EMW7;O95071;O95071-2	N/A	41668.8	53.667	78.941	TRUE	FALSE	FALSE
A*02:01	ELAERVPAI	9	5	0.913863	Protein	E7EN77;Q15021;Q6ZV00;B3KMS0;A0PJ76	ELAERVPAI	242.36	0.344	1.865	FALSE	FALSE	FALSE
A*02:01	ELFPHSLLSV	10	3	0.780116	Protein	Q9H9Y6;Q6DKI9;Q9BSR4;Q9H9Y6-4;Q9H9Y6-2	ELFPHLLSV	49.59	0.325	0.651	TRUE	FALSE	FALSE
A*02:01	ELIEEEVAKLLKL	13	4	0.954514	Protein	Q52NV4;P12081-2;P12081-3;B4DEA2;B4E1C5	ELIEELLKL	8710.71	5.75	13.422	FALSE	FALSE	FALSE
A*02:01	ELKPFIEEL	9	18	0.808894	Non-coding	NR_164834-9;NR_164834-1;NR_164834-6;NR_164834-7;NR_164834-3	ELKPFIEEL	2425.04	0.6	6.414	TRUE	FALSE	FALSE
A*02:01	ELMEKVEAI	9	1	0.824549	Protein	B4DU05;Q6P9H5;B4DH95;B2RBH7;Q6P9H5-2	ELMEKVEAI	150.98	0.272	1.41	FALSE	FALSE	FALSE
A*02:01	ELSDVLIYL	9	2	0.905715	Protein	Q9H773	ELSDVLIYL	21.85	0.071	0.319	TRUE	FALSE	FALSE
A*02:01	ELSSQPTIPIV	11	1	0.68165	Protein	F6IQV9;U5YKF9;A0A0S4XRV2;F6IQX8;A0A0S4XQR9	ELSPTIPIV	7914.7	6.258	12.618	FALSE	FALSE	FALSE
A*02:01	EMVELRILL	9	4	0.926941	Protein	P61978;P61978-3;A0A024R228;P61978-2;Q5T6W2	EMVELRILL	964.24	1.749	3.979	TRUE	FALSE	FALSE
A*02:01	ERYDILLLT	9	1	0.642165	Protein	Q6AWC4;P23467;P23467-3;Q6MZF6;F8VSD5	ERYDILLLT	28024.8	19.922	38.889	FALSE	FALSE	TRUE
A*02:01	FAIDPHLLLSV	11	3	0.946112	Protein	G1UI16;Q29RF7-3;Q29RF7	FAIDPLLSV	335.88	1.098	2.247	TRUE	FALSE	FALSE
A*02:01	FAIPMIHAV	9	5	0.925253	Protein	Q9GZR7;G3V529;Q59FS7;B4DKV2;B4DM03	FAIPMIHAV	13.02	0.083	0.176	TRUE	FALSE	FALSE
A*02:01	FASHVSPEV	9	8	0.881002	Protein	Q9NP61-2;Q9NP61;A0A024R4U0;B7Z6L2	FASHVSPEV	34.5	0.26	0.493	TRUE	FALSE	FALSE
A*02:01	FGLARAFGV	9	2	0.71553	Protein	K7ELV5;A0A024R8R3;Q00526;B4DDL9;A0A024RB77	FGLARAFGV	362.46	5.281	2.347	TRUE	FALSE	TRUE
A*02:01	FGRGAQLPAL	10	2	0.627316	Non-coding	NR_045929-2;NR_045929-1	FGRGALPAL	14884.1	21.724	19.889	FALSE	FALSE	TRUE
A*02:01	FIAFLSPKV	9	1	0.88946	Protein	Q9P0H9;Q5T092;Q6IBJ7;Q5T091;O15258	FIAFLSPKV	10.15	0.155	0.133	FALSE	FALSE	FALSE
A*02:01	FIAPVTLKV	9	1	0.955308	Protein	O00469-2;Q96AR9;B4DHG3;O00469-3;E7ETU9	FIAPVTLKV	7.08	0.009	0.074	FALSE	FALSE	FALSE
A*02:01	FIDEYVETV	9	1	0.651467	Protein	Q6ZUJ8-2;Q6ZUJ8	FIDEYVETV	4.89	0.006	0.031	TRUE	FALSE	FALSE
A*02:01	FIDKFTPPVV	10	1	0.6123	Protein	A0A1V0E3V4;A0A0G2JMH6;B0UXD8;Q59GE3;P01903	FIDKFPPVV	28.6	0.948	0.422	TRUE	FALSE	FALSE
A*02:01	FIFEKILQL	9	4	0.938191	Protein	Q6GYQ0-7;Q6GYQ0-3;Q6GYQ0-6;Q6GYQ0-5;Q6GYQ0	FIFEKILQL	4.73	0.003	0.029	TRUE	FALSE	FALSE
A*02:01	FIFEKKLAQA	10	4	0.475154	Protein	Q86XL3-2;A0A220T1R9;Q86XL3	FIFEKLAQA	32.06	0.335	0.465	TRUE	FALSE	FALSE
A*02:01	FIFSDTHEL	9	1	0.869731	Protein	B4E2S2;Q9UKK3	FIFSDTHEL	4.99	0.014	0.033	TRUE	FALSE	FALSE
A*02:01	FIFSEKPVFV	10	4	0.958964	Protein	Q92673;A0A024R3H2	FIFEKPVFV	5.82	0.077	0.053	TRUE	FALSE	FALSE
A*02:01	FIIEKQPPQV	10	14	0.895198	Protein	Q59GY7;Q8WWS9;A0A384N5W4;Q8WW55;A8K6I5	FIIEKPPQV	22.49	0.089	0.33	TRUE	FALSE	FALSE
A*02:01	FIINGIEKV	9	2	0.823189	Protein	Q9H9Y6-5;Q9H9Y6-3;Q9NVC2;Q9H9Y6;B7Z1W6	FIINGIEKV	6.76	0.017	0.069	TRUE	FALSE	FALSE
A*02:01	FIIQGLRSV	9	6	0.777761	Protein	Q67AI6;A0A2K9UYU0;A0A140TA34;Q67AH5;Q30066	FIIQGLRSV	11.15	0.062	0.15	FALSE	FALSE	FALSE
A*02:01	FIIQRNKN	8	1	0.557894	Non-coding	NR_148875-3;NR_148875-2;NR_148875-4;NR_148875-6;NR_148875-7	FIIQRNKN-	42900.8	73.75	83.782	FALSE	FALSE	FALSE
A*02:01	FILAAIYHL	9	2	0.885933	Protein	B4E0T8;A0A024QZ63;Q92614;Q92614-5;B4DYM1	FILAAIYHL	4.22	0.12	0.021	TRUE	FALSE	FALSE
A*02:01	FILDISPVAHRV	12	1	0.697929	Protein	A0A024RD52;B3KXW6;Q8TEZ7	FILDISHRV	58.72	1.119	0.741	TRUE	FALSE	FALSE
A*02:01	FILEKIEYL	9	7	0.913611	Protein	E7EMB1;B3KUB9	FILEKIEYL	4.62	0.007	0.028	TRUE	FALSE	FALSE
A*02:01	FILKKLDSI	9	2	0.752293	Protein	H3BUX3;Q8N4H5;Q8N4H5-3	FILKKLDSI	26.16	0.244	0.388	FALSE	FALSE	FALSE
A*02:01	FILPHISTA	9	1	0.640552	Protein	Q9H6Q4-3;H3BSJ7;Q9H6Q4;B3KPK9;H3BSH2	FILPHISTA	15.33	0.047	0.212	TRUE	FALSE	FALSE
A*02:01	FILPKEIAV	9	2	0.76945	Protein	H0Y564;Q9H1A4	FILPKEIAV	9.75	0.018	0.126	TRUE	FALSE	FALSE
A*02:01	FILPYIHKA	9	1	0.811278	Protein	Q6P1A2-2;Q6P1A2	FILPYIHKA	9.29	0.021	0.116	TRUE	FALSE	FALSE
A*02:01	FIMDDPAGNSYL	12	3	0.856192	Protein	H7C0E5;H7BZM7;O75312;B4DVT8	FIMDDPAYL	22.78	0.619	0.335	TRUE	FALSE	FALSE
A*02:01	FIMEGPLTRI	10	4	0.9517	Protein	D3DSB1;Q59G32;B7ZKT5;Q07890;B4DZB0	FIMEGPLTI	13.34	0.221	0.18	TRUE	FALSE	FALSE
A*02:01	FIMEGTLTRV	10	2	0.867792	Protein	A0A2X0SG47;Q07889;Q53SF8;G5E9C8;Q8NIA3	FIMEGLTRV	4.24	0.073	0.022	TRUE	FALSE	FALSE
A*02:01	FINIVVHSV	9	7	0.962132	Protein	Q8IVF7;O95466-2;Q6ZNK3;I6L9I9;F8W1F5	FINIVVHSV	13.85	0.092	0.188	TRUE	FALSE	FALSE
A*02:01	FIQEIEHAL	9	4	0.965509	Protein	B7Z689;Q6NX51;B7Z502;B3KTF7;B7Z321	FIQEIEHAL	17.33	0.036	0.25	TRUE	FALSE	FALSE
A*02:01	FISEFEHRV	9	5	0.883753	Protein	J3KNQ3;Q9Y6E3;Q9UNM6;A0A024R201;A0A087WUL9	FISEFEHRV	5.93	0.015	0.055	TRUE	FALSE	FALSE
A*02:01	FIWENIHTL	9	8	0.955355	Protein	Q03001-14;Q03001;F8W9J4;Q9HDA7;E9PHM6	FIWENIHTL	2.97	0.003	0.009	TRUE	FALSE	FALSE
A*02:01	FIWPMLIHI	9	2	0.933091	Protein	B3KX23;A0A0A0MSJ0;Q86XP3;Q86XP3-2;B3KTL4	FIWPMLIHI	8.32	0.118	0.095	TRUE	FALSE	FALSE
A*02:01	FLADIVQKL	9	1	0.964363	Protein	Q9NZJ4-2;Q9NZJ4	FLADIVQKL	3.66	0.001	0.013	TRUE	FALSE	FALSE
A*02:01	FLADVDKLKL	10	4	0.945861	Protein	Q14008;Q14008-2;Q14008-3	FLADVDLKL	12.58	0.067	0.17	TRUE	FALSE	FALSE
A*02:01	FLAEDALNTV	10	1	0.811658	Protein	A0A0G2JI85;A0A1U9X7L5;A0A024RCQ1;A0A024RCL1;Q08345	FLAEDLNTV	3.78	0.037	0.014	TRUE	FALSE	FALSE
A*02:01	FLAEDPKVTL	10	8	0.934247	Protein	Q05JX5;U5KJ79;F2YHL6;Q9HC16;M4VSD8	FLAEDPVTL	18.26	0.034	0.265	TRUE	FALSE	FALSE
A*02:01	FLAEEGFYKF	10	3	0.802725	Protein	E9PI32;E9PN73;P46977;A0A024R3J7;A0A0C4DH80	FLAEEGFYF	194.05	1.577	1.641	TRUE	FALSE	FALSE
A*02:01	FLAEGLRNENL	11	1	0.483462	Protein	J3QKX8;Q86WV1;V9HW03;Q86WV1-2;A8K453	FLAEGLENL	29.28	0.108	0.431	TRUE	FALSE	FALSE
A*02:01	FLAEHPNVTL	10	12	0.945778	Protein	B4DGW8;Q8IUX4;Q96AK3;B2CML4	FLAEHPVTL	8.05	0.023	0.09	TRUE	FALSE	FALSE
A*02:01	FLAERLYAEV	10	7	0.900152	Protein	F6QPS0;P30260;G5EA36;P30260-2;B4DRN1	FLAERLYEV	3.01	0.11	0.009	TRUE	FALSE	FALSE
A*02:01	FLAFILHRL	9	3	0.708909	Protein	H0Y8M4;P30281;D6RIX2;Q59EI6;B3KP19	FLAFILHRL	4.2	0.027	0.021	TRUE	FALSE	FALSE
A*02:01	FLAGAVTSV	9	1	0.614273	Protein	A8MPS7-2;A8MPS7;A0A024R187;A8MPS7-3	FLAGAVTSV	2.67	0.006	0.008	TRUE	FALSE	FALSE
A*02:01	FLAHDQAVRTL	11	5	0.862079	Protein	Q53SY8;H0Y4Q6;H7C3X9;Q8WUA4	FLAHDQATL	151.57	0.487	1.414	TRUE	FALSE	FALSE
A*02:01	FLANIGTSV	9	9	0.926348	Protein	Q9UKG1;B4DQX8;A0A2P1C6M4	FLANIGTSV	4.48	0.026	0.026	TRUE	FALSE	FALSE
A*02:01	FLANLHITA	9	1	0.781954	Protein	Q59EI8;Q16690	FLANLHITA	11.37	0.154	0.153	TRUE	FALSE	FALSE
A*02:01	FLAPDNSLLLA	11	3	0.7528	Non-coding	NR_148197-9;NR_148197-15;NR_148197-4;NR_148197-12;NR_148197-6	FLAPDLLLA	32.89	0.346	0.475	TRUE	FALSE	FALSE
A*02:01	FLASESLIKQI	11	20	0.967225	Protein	A0A024RCW3;P62906;Q1JQ76	FLASESLQI	128.4	0.579	1.268	TRUE	FALSE	FALSE
A*02:01	FLASLSNRL	9	1	0.848058	Protein	D3DX33;Q4LE69;B4DYG5;P42356	FLASLSNRL	8.21	0.049	0.093	FALSE	FALSE	FALSE
A*02:01	FLATVVTQL	9	1	0.69424	Protein	Q9Y5U4;B4DQ23;A0A0C4DGZ4;A0A024RAI2	FLATVVTQL	5.69	0.008	0.052	FALSE	FALSE	FALSE
A*02:01	FLAVKPDGV	9	5	0.888217	Protein	Q13232;H3BPD9;H3BRA8;H3BMQ7;Q9NUF9	FLAVKPDGV	9.78	0.103	0.126	TRUE	FALSE	FALSE
A*02:01	FLAYETKSV	9	1	0.733345	Protein	Q9UBS5-4;A0A140T9S4;Q5SUJ9;A0A1U9X7R1;A0A1U9X7Q8	FLAYETKSV	12.59	0.075	0.17	FALSE	FALSE	FALSE
A*02:01	FLDATLTSV	9	4	0.875985	Protein	A8KA68;O43462	FLDATLTSV	2.82	0.005	0.008	TRUE	FALSE	FALSE
A*02:01	FLDDNQIVT	9	2	0.819271	Protein	Q71UM6;F6UT28;P62873-2;B3KVK2;P62873	FLDDNQIVT	71.69	0.278	0.851	FALSE	FALSE	FALSE
A*02:01	FLDDVVHSL	9	8	0.951801	Protein	Q15652-2;Q15652;A0A1W2PNZ9;B7ZLC8;Q15652-3	FLDDVVHSL	2.24	0	0.007	TRUE	FALSE	FALSE
A*02:01	FLDEKTHEL	9	5	0.907615	Protein	F8VZA0;Q9H0K6	FLDEKTHEL	2.25	0	0.007	TRUE	FALSE	FALSE
A*02:01	FLDENIGGVAV	11	1	0.84703	Protein	J3KNF3;O43151-4;O43151	FLDENIVAV	12.83	0.075	0.173	TRUE	FALSE	FALSE
A*02:01	FLDENVHFA	9	6	0.808963	Protein	Q6V1X1-5;Q6V1X1-2;Q6V1X1-3;B4DLA8;H3BNM2	FLDENVHFA	3.05	0.007	0.009	TRUE	FALSE	FALSE
A*02:01	FLDENVHFF	9	11	0.967723	Protein	Q86TI2-4;Q86TI2;Q86TI2-2	FLDENVHFF	8.55	0.011	0.099	TRUE	FALSE	FALSE
A*02:01	FLDEPTNHL	9	13	0.967723	Protein	Q9UG63-2;A0A090N7X1;A0A090N7Y2;Q9UG63	FLDEPTNHL	4.23	0.001	0.021	TRUE	FALSE	FALSE
A*02:01	FLDGHDLQL	9	7	0.927805	Protein	Q969V6;Q29R68;B0QY83;W0Z7M9;A0A087WU73	FLDGHDLQL	4.37	0.003	0.024	TRUE	FALSE	FALSE
A*02:01	FLDGYVSQL	9	3	0.863268	Protein	A0A024R3R6;B4E206;B4E3T7;Q8WUM0	FLDGYVSQL	3.47	0.002	0.011	TRUE	FALSE	FALSE
A*02:01	FLDHVMYTI	9	2	0.767022	Protein	Q13422-3;B4DWF2;Q13422-7;Q9UKS7-4;Q9UKS7-2	FLDHVMYTI	2.69	0.027	0.008	TRUE	FALSE	FALSE
A*02:01	FLDITNPKA	9	4	0.875002	Protein	Q541A5;Q92890-1;C9J6N9;Q92890-3;C9JNP9	FLDITNPKA	59.18	0.194	0.745	TRUE	FALSE	FALSE
A*02:01	FLDKQGFYV	9	4	0.822555	Protein	A8K5P4;Q9UBC2;M0R1V5;M0R165;A5PKY0	FLDKQGFYV	2.46	0.007	0.007	TRUE	FALSE	FALSE
A*02:01	FLDLGPPGI	9	16	0.899685	Protein	F8W6D1;Q9NWF9;Q9NWF9-1;B4DM02;A8K8N1	FLDLGPPGI	8.21	0.029	0.093	TRUE	FALSE	FALSE
A*02:01	FLDMTNWNL	9	1	0.79553	Protein	Q9H6K1-2;A0A024RCW2;Q9H6K1	FLDMTNWNL	3.58	0.051	0.012	TRUE	FALSE	FALSE
A*02:01	FLDNGPKTI	9	5	0.801389	Protein	B4DZF2;H0YCH5;P78344;Q2TU89;H0Y3P2	FLDNGPKTI	67.2	0.05	0.811	TRUE	FALSE	FALSE
A*02:01	FLDNLHINL	9	8	0.967723	Protein	Q08AC9;Q05D90;Q9NV86;Q2TAA6;Q9NYU1-2	FLDNLHINL	4.71	0.007	0.028	TRUE	FALSE	FALSE
A*02:01	FLDPGGPMMKL	11	3	0.945161	Protein	Q9NXE4-2;Q9NXE4;H7BXF4;C9J647;Q9NXE4-4	FLDPGGPML	42.43	0.039	0.575	TRUE	FALSE	FALSE
A*02:01	FLDPNNIPKA	10	16	0.893629	Protein	Q9BVK2;A0A024R5K5;H0YDD3;Q9BVK2-2;B3KQL8	FLDPNIPKA	32.04	0.113	0.465	FALSE	FALSE	FALSE
A*02:01	FLDPRPLTV	9	6	0.862172	Protein	B4DLK5;Q16678;Q53TK1;Q2HZ43;Q5TZV6	FLDPRPLTV	4.21	0.001	0.021	TRUE	FALSE	FALSE
A*02:01	FLDSAYFRL	9	1	0.959874	Protein	D3K5P3;Q8NEL9;A0A087X0H7	FLDSAYFRL	3.06	0.019	0.009	TRUE	FALSE	FALSE
A*02:01	FLDSGTIRGV	10	3	0.762466	Protein	Q5TGY6;P78453;B7Z6W7;B7Z9D2;Q7KZ45	FLDSGTIRV	8.33	0.074	0.095	TRUE	FALSE	FALSE
A*02:01	FLDSTSPLL	9	1	0.834009	Protein	J3KN16;Q5VYK3;R4GMY1;B3KXF2	FLDSTSPLL	3.63	0.007	0.013	TRUE	FALSE	FALSE
A*02:01	FLDTLKVLV	9	3	0.948755	Protein	A0A024R796;P55273	FLDTLKVLV	6.78	0.025	0.069	TRUE	FALSE	FALSE
A*02:01	FLDVNSHKI	9	6	0.880034	Protein	A0A0G2JQX1;Q96RT8;Q96RT8-2;A0A0G2JSA7;A0A0G2JPW5	FLDVNSHKI	9.19	0.024	0.113	TRUE	FALSE	FALSE
A*02:01	FLEKLLPPV	9	6	0.756531	Protein	Q5QPQ0;O95372;A0A140VJC9	FLEKLLPPV	4.13	0.151	0.019	TRUE	FALSE	FALSE
A*02:01	FLEPVNPRL	9	3	0.91183	Protein	F8VU39;Q9UIF9;A0A0C4DGI9;Q9UIF9-3;J3QK86	FLEPVNPRL	12.11	0.014	0.164	TRUE	FALSE	FALSE
A*02:01	FLETNVPLL	9	5	0.859755	Protein	P26232-3;E5RFM5;B4DKT9;A0A0A0MTJ6;P35221-3	FLETNVPLL	11.57	0.046	0.156	TRUE	FALSE	FALSE
A*02:01	FLFASTILHL	10	2	0.949539	Protein	Q53G02;P61803;F5GXX5	FLFASTIHL	5.01	0.23	0.034	TRUE	FALSE	FALSE
A*02:01	FLFDGSPTYVL	11	5	0.76849	Protein	A0A0U1RQF0;P49327	FLFDGSPTL	4.33	0.015	0.023	TRUE	FALSE	FALSE
A*02:01	FLFDHLLTL	9	3	0.912897	Protein	Q7L2H7-2;Q7L2H7;J3KNJ2;H0YCQ8	FLFDHLLTL	2.25	0.001	0.007	TRUE	FALSE	FALSE
A*02:01	FLFDIPKILDL	11	2	0.817436	Protein	A0A024R1E1;Q9H1I8-2;A0A024R1F9;Q9H1I8;B1AH59	FLFDKILDL	17.98	0.166	0.26	TRUE	FALSE	FALSE
A*02:01	FLFDNDFPAL	10	2	0.928976	Protein	A0A0S2Z3Y7;F6KV90;B4DT62;D1MBF6;P07902	FLFDDFPAL	2.6	0.047	0.008	TRUE	FALSE	FALSE
A*02:01	FLFDTQHFI	9	11	0.963252	Protein	B7ZAU8;B4E263;Q96ES5;Q5T3Q7;B3KWS1	FLFDTQHFI	1.98	0.004	0.006	TRUE	FALSE	FALSE
A*02:01	FLFELPSRL	9	6	0.935751	Protein	E9PRV0;Q9UID3;Q9UID3-2;E9PKX7;E9PMB6	FLFELPSRL	4.99	0.006	0.033	TRUE	FALSE	FALSE
A*02:01	FLFEPVVKA	9	9	0.85774	Protein	G3V5Z3;A0A024R6M2;Q6IN85;Q6IN85-2;Q6IN85-4	FLFEPVVKA	7.52	0.006	0.08	TRUE	FALSE	FALSE
A*02:01	FLFEPVVKAFL	11	1	0.639323	Protein	Q6IN85-2;G3V5Z3;Q6IN85;Q6IN85-4;A0A024R6M2	FLFEPVVKL	12.23	0.068	0.165	TRUE	FALSE	FALSE
A*02:01	FLFGEEPSKL	10	9	0.965947	Protein	Q86XL3-3;A0A220T1R9;F5H1D4;Q86XL3	FLFEEPSKL	20.95	0.052	0.302	TRUE	FALSE	FALSE
A*02:01	FLFGEVHKA	9	7	0.863918	Protein	Q7L590;Q5T670;Q7L590-2	FLFGEVHKA	4.13	0.006	0.019	TRUE	FALSE	FALSE
A*02:01	FLFGYPKRL	9	7	0.802215	Protein	Q9HAY2	FLFGYPKRL	12.37	0.03	0.167	TRUE	FALSE	FALSE
A*02:01	FLFLDRTYV	9	7	0.893398	Protein	Q13619;A0A087WWN2;A0A0A0MR50;Q13620;K4DI93	FLFLDRTYV	3.15	0.055	0.009	TRUE	FALSE	FALSE
A*02:01	FLFNKVVNL	9	7	0.918831	Protein	P62699	FLFNKVVNL	3.37	0.003	0.01	TRUE	FALSE	FALSE
A*02:01	FLFNTENKLLL	11	8	0.948798	Protein	C9JKM8;Q13907;C9JD53;Q13907-2	FLFENKLLL	12.26	0.164	0.166	TRUE	FALSE	FALSE
A*02:01	FLFPHSVLV	9	4	0.874332	Protein	A0A087WYD4;C9JUY7;F8W001;Q9BVX2-2;Q9BVX2	FLFPHSVLV	2.02	0.002	0.006	TRUE	FALSE	FALSE
A*02:01	FLFPVYPLI	9	1	0.815949	Protein	Q9H6U8-2;Q9H6U8;Q9H6U8-3;Q9H6U8-4;B4DYW0	FLFPVYPLI	3.83	0.048	0.015	FALSE	FALSE	FALSE
A*02:01	FLFQAGSGIYHV	12	1	0.890429	Protein	B4DLA8;Q6V1X1-2;B4DYW8;Q6V1X1-3;Q6V1X1-6	FLFSGIYHV	4.95	0.482	0.032	TRUE	FALSE	FALSE
A*02:01	FLFQEPRSI	9	12	0.867341	Protein	A0A024R363;Q9UK61-2;Q9UK61;Q9UK61-3;Q9UK61-4	FLFQEPRSI	30.91	0.05	0.451	TRUE	FALSE	FALSE
A*02:01	FLFQFIPYM	9	2	0.783707	Protein	Q15800;D6REA2;D6R952;D6RDP9	FLFQFIPYM	4.75	0.068	0.029	TRUE	FALSE	FALSE
A*02:01	FLFRITQV	8	1	0.789089	Protein	B7Z5P7	FLF-RITQV	58.53	0.264	0.739	TRUE	FALSE	FALSE
A*02:01	FLFVDPELV	9	1	0.694842	Protein	A4FVB8;Q5UE93	FLFVDPELV	3.63	0.03	0.013	TRUE	FALSE	FALSE
A*02:01	FLGEKIASV	9	2	0.852085	Protein	Q8N128;Q8N128-2;G3V583	FLGEKIASV	2.82	0.003	0.008	TRUE	FALSE	FALSE
A*02:01	FLGENISNFL	10	1	0.772295	Protein	A0A1B2FK85;A0A1B2FJK3;A0A1B2FJT1;A0A1B2FJQ0;A0A1B2FK26	FLGEISNFL	10.53	0.318	0.139	TRUE	FALSE	FALSE
A*02:01	FLGIHVFLV	9	4	0.949803	Protein	B4DW71;Q9Y679-3;Q68CX8;A8KAQ6;Q9Y679	FLGIHVFLV	4.23	0.164	0.021	TRUE	FALSE	FALSE
A*02:01	FLGKIYQI	8	4	0.914381	Protein	Q9NZJ4-2;Q9NZJ4	FL-GKIYQI	63.68	0.39	0.782	TRUE	FALSE	FALSE
A*02:01	FLGSFIDHV	9	8	0.967723	Protein	B4DMX5;Q5HYA8-3;A0A0C4DFP8;Q5HYA8	FLGSFIDHV	3.57	0.041	0.012	TRUE	FALSE	FALSE
A*02:01	FLHDGLIRV	9	2	0.872951	Protein	Q9Y4D8-5;J3KPF0;F8VU57	FLHDGLIRV	2.8	0.002	0.008	FALSE	FALSE	FALSE
A*02:01	FLHDHVDLQV	10	9	0.793464	Protein	B4DZF2;P78344;Q3LIE0;Q2TU89;H0Y3P2	FLHDHVLQV	6.17	0.03	0.058	TRUE	FALSE	FALSE
A*02:01	FLHEATVRL	9	8	0.90444	Protein	Q12772;Q8NCY3;B4DSU0;A0A024R1Q0;H0Y7E5	FLHEATVRL	5.65	0.006	0.051	TRUE	FALSE	FALSE
A*02:01	FLHPEPFSI	9	3	0.739312	Protein	B4DX30;Q9ULC5;Q9ULC5-3;Q9ULC5-4	FLHPEPFSI	4.8	0.006	0.029	FALSE	FALSE	FALSE
A*02:01	FLIDLNSTHGTFL	13	1	0.720905	Protein	Q561W4;Q12972;B4E389	FLIDLNTFL	13.15	0.745	0.178	TRUE	FALSE	FALSE
A*02:01	FLIEEQKIV	9	1	0.840015	Protein	Q5MK14;P49207;A0A024RDH8	FLIEEQKIV	20.14	0.055	0.291	TRUE	FALSE	FALSE
A*02:01	FLIEEQKIVV	10	8	0.926431	Protein	Q5MK14;P49207;A0A024RDH8	FLIEEQIVV	15.36	0.158	0.213	TRUE	FALSE	FALSE
A*02:01	FLIEEQKIVVKV	12	11	0.964936	Protein	Q5MK14;P49207;A0A024RDH8	FLIEEQVKV	22.93	0.222	0.337	TRUE	FALSE	FALSE
A*02:01	FLIEPEHVNTV	11	4	0.755301	Protein	B4DM84;Q96JH7	FLIEPEHTV	9.93	0.034	0.129	TRUE	FALSE	FALSE
A*02:01	FLIGILLREV	10	2	0.664249	Protein	B4DF07;H7C0I3;A0A2R8YD85;Q96BY6-3;Q96BY6	FLIGILLEV	5.4	0.311	0.043	TRUE	FALSE	FALSE
A*02:01	FLIGPKLYEA	10	7	0.924392	Protein	A0A2R8Y6W8;A8K359;Q53HW5;B3KRG2;G3V1S1	FLIPKLYEA	4.2	0.11	0.021	TRUE	FALSE	FALSE
A*02:01	FLIGQGAHV	9	1	0.76568	Protein	H0YHL8;O14974-5;O14974;F8VZN8;A0A024RBF1	FLIGQGAHV	7.77	0.048	0.085	FALSE	FALSE	FALSE
A*02:01	FLIILPKELQA	11	1	0.381385	Protein	B4DI35;B4DE95;B4DVH3;A0A024RCN4;A0A087WXH0	FLLPKELQA	266.24	0.291	1.958	TRUE	FALSE	FALSE
A*02:01	FLINFIHTL	9	6	0.939564	Protein	Q3LIB1;O15031	FLINFIHTL	2.4	0.003	0.007	TRUE	FALSE	FALSE
A*02:01	FLINGKPFYF	10	3	0.933185	Protein	B2R6X2;P08236-3;P08236;B4DTH9	FLINGPFYF	69.12	1.456	0.829	FALSE	FALSE	FALSE
A*02:01	FLIPFETRQL	10	2	0.563626	Protein	Q9ULT8;Q2KQ74;B3KWT6;H0YJD4;A0A087X2H1	FLIPFETQL	30.41	0.169	0.445	TRUE	FALSE	FALSE
A*02:01	FLIPIYHQV	9	7	0.913494	Protein	A0A024R0Y2;B4DWK9;B4DIR2;Q13085-2;Q13085-3	FLIPIYHQV	2.46	0.001	0.007	TRUE	FALSE	FALSE
A*02:01	FLIPKFFEL	9	2	0.738305	Protein	Q9P1A2-3;Q9P1A2	FLIPKFFEL	2.18	0.002	0.006	TRUE	FALSE	FALSE
A*02:01	FLIQDQQGLITL	12	1	0.644228	Protein	O95630-2;O95630;A0A140VK54	FLIQDQITL	47.83	0.592	0.631	TRUE	FALSE	FALSE
A*02:01	FLIQNVLRL	9	1	0.835679	Protein	Q7Z355;B4DVX2;Q7Z3U5;J3KR24;A0A0A0MSX9	FLIQNVLRL	9.08	0.017	0.111	FALSE	FALSE	FALSE
A*02:01	FLIRESETL	9	6	0.806677	Protein	B4DQ79;P07948-2;P07948;Q6NUK7;A8K379	FLIRESETL	15	0.056	0.205	TRUE	FALSE	FALSE
A*02:01	FLITILDHL	9	2	0.952062	Protein	A8K5G2;C9JEX3;Q13614;F8WA39;A0A024R3B7	FLITILDHL	5	0.054	0.033	TRUE	FALSE	FALSE
A*02:01	FLIVKVWAE	9	1	0.427251	Protein	Q9UN67;B3KPI2	FLIVKVWAE	292.45	2.866	2.066	FALSE	FALSE	FALSE
A*02:01	FLKNELDNV	9	2	0.646212	Protein	E7EN91;E7EVC4;B4DIU1;E7EW89;Q9BWF2	FLKNELDNV	9.35	0.063	0.117	TRUE	FALSE	FALSE
A*02:01	FLLALEPEL	9	6	0.913483	Protein	Q6IBR0;Q96HX3;F8WF32;Q53EP4;P04843	FLLALEPEL	4.4	0.022	0.025	TRUE	FALSE	FALSE
A*02:01	FLLALGHFL	9	1	0.695926	Protein	Q9UKR5;Q6FII3;Q86TW5	FLLALGHFL	3.37	0.053	0.01	TRUE	FALSE	FALSE
A*02:01	FLLDFHSHL	9	4	0.906782	Protein	M0R044;M0R0F2;M0R189;Q8N594;W4VSR2	FLLDFHSHL	3.55	0.009	0.012	FALSE	FALSE	FALSE
A*02:01	FLLDGFPRTV	10	4	0.841678	Protein	P54819;G3V213;P54819-5;B4DLK2;F8VZG5	FLLDGFPTV	3.44	0.019	0.011	FALSE	FALSE	FALSE
A*02:01	FLLDHGASL	9	1	0.827637	Protein	Q12955-5;Q12955;Q12955-7;Q59G01;Q12955-4	FLLDHGASL	4.68	0.01	0.028	TRUE	FALSE	FALSE
A*02:01	FLLDIEDRIYQG	12	6	0.560502	Protein	Q9NRL2;Q9NRL2-2;Q59G54;D3DS96	FLLDIIYQG	978.61	13.051	4.009	TRUE	FALSE	FALSE
A*02:01	FLLDKALLI	9	7	0.929372	Protein	A0A2X0SZ57;A0A0A0MR07;P15498-2;F5H5P4;Q96D37	FLLDKALLI	4.06	0.017	0.018	TRUE	FALSE	FALSE
A*02:01	FLLDKPQDLSI	11	2	0.909759	Protein	Q6ZN28	FLLDKPLSI	21.02	0.068	0.304	TRUE	FALSE	FALSE
A*02:01	FLLDMHWNPSL	11	1	0.830813	Protein	X6RI15;Q9UNY4;A0A024R0F1	FLLDWNPSL	7.49	0.117	0.08	FALSE	FALSE	FALSE
A*02:01	FLLDPVKGERL	11	6	0.922938	Protein	Q15149-7;D3DWL0;Q15149-2;Q15149-9;Q15149-8	FLLDPVERL	66.18	0.063	0.802	TRUE	FALSE	FALSE
A*02:01	FLLDPVKGERLTV	13	2	0.751426	Protein	Q15149-8;Q15149;Q15149-3;Q15149-6;Q15149-7	FLLDPVLTV	11.94	0.228	0.161	TRUE	FALSE	FALSE
A*02:01	FLLDPYKYMTL	11	2	0.726345	Protein	Q9UIG0-2;Q9UIG0	FLLDPYMTL	21.17	0.147	0.306	TRUE	FALSE	FALSE
A*02:01	FLLEDDIHVS	10	3	0.739106	Protein	Q8WW01-2	FLLEDDIHV	31.66	0.872	0.46	TRUE	FALSE	FALSE
A*02:01	FLLEGIRSL	9	8	0.911787	Protein	F8W050;Q6P1M2;P55160;P55160-2;Q9BV52	FLLEGIRSL	3.71	0.004	0.014	TRUE	FALSE	FALSE
A*02:01	FLLEIRQTL	9	1	0.644953	Non-coding	NR_146933-3;NR_146932-3;NR_146933-2;NR_146932-2	FLLEIRQTL	6.86	0.009	0.071	TRUE	FALSE	FALSE
A*02:01	FLLEKPFSV	9	8	0.957591	Protein	Q8WUV3;B4DP44;O60678;O60678-2;B4DWB1	FLLEKPFSV	1.77	0.001	0.005	TRUE	FALSE	FALSE
A*02:01	FLLENSSKV	9	1	0.92801	Protein	B4DK38;O94868;E9PG19;A0A024R5H2;O94868-2	FLLENSSKV	3.83	0.009	0.015	TRUE	FALSE	FALSE
A*02:01	FLLEQEKTQAL	11	4	0.920294	Protein	Q8WXE1-2;A0A024R307;Q8WXE1-5;Q8WXE1;A0A0U1RQR9	FLLEQTQAL	28.99	0.079	0.427	TRUE	FALSE	FALSE
A*02:01	FLLEREQLL	9	1	0.590267	Protein	Q96M89-2;Q96M89;H7C005	FLLEREQLL	5.7	0.009	0.052	TRUE	FALSE	FALSE
A*02:01	FLLERRLT	8	1	0.425736	Protein	Q5TZV8;B3KQD7;Q12894;H7C444;Q12894-2	FLLER-RLT	12307	10.947	17.117	TRUE	FALSE	FALSE
A*02:01	FLLESINSHIFL	12	3	0.953278	Protein	L8E861	FLLESINSL	7.84	0.345	0.087	FALSE	FALSE	FALSE
A*02:01	FLLETSQIF	9	9	0.57647	Non-coding	NR_036544-2;NR_036543-2	FLLETSQIF	192.79	0.546	1.635	FALSE	FALSE	FALSE
A*02:01	FLLFINHRL	9	3	0.910885	Protein	H0Y793;A8W2J3;Q59EG3;B7Z821;B2R6K0	FLLFINHRL	4.05	0.031	0.018	TRUE	FALSE	FALSE
A*02:01	FLLGEHLLL	9	3	0.950718	Protein	B3KT81;A3KMH1-3;A3KMH1;A3KMH1-2	FLLGEHLLL	5.17	0.026	0.037	TRUE	FALSE	FALSE
A*02:01	FLLGKEVSL	9	2	0.806211	Protein	Q66K14-2;A1L3A9;B9A6K8;Q66K14	FLLGKEVSL	7.4	0.008	0.078	TRUE	FALSE	FALSE
A*02:01	FLLGPEGQHLL	11	7	0.937246	Protein	E9PNI7;Q53GL7;B3KY29;A2RUM0;B4E0C4	FLLEGQHLL	11.07	0.033	0.149	TRUE	FALSE	FALSE
A*02:01	FLLGPRLVLA	10	1	0.482736	Protein	P49755;Q53GF9;B4DL12;A0A024R6I3;G3V2K7	FLLPRLVLA	12.64	0.343	0.171	TRUE	FALSE	FALSE
A*02:01	FLLHIQQQV	9	1	0.790713	Protein	B4E205;O95486	FLLHIQQQV	4.53	0.006	0.027	TRUE	FALSE	FALSE
A*02:01	FLLKDLSSL	9	1	0.792247	Protein	A8K453;Q86WV1-2;J3QRG3;V9HW03;Q86WV1	FLLKDLSSL	4.69	0.02	0.028	FALSE	FALSE	FALSE
A*02:01	FLLKLTPLL	9	1	0.793573	Protein	O75448;B4DSQ6;F5GY88;B4E1A5;F5H5K2	FLLKLTPLL	4.14	0.024	0.019	TRUE	FALSE	FALSE
A*02:01	FLLLLNLLSL	10	2	0.749696	Protein	A5D8Y4;A0A024R8N8;B4E0S0;Q8IU68	FLLLNLLSL	23.66	1.716	0.349	FALSE	FALSE	FALSE
A*02:01	FLLLPDAEAQL	11	2	0.7971	Protein	Q5BJH2;B7Z3K1	FLLDAEAQL	33.77	0.119	0.485	TRUE	FALSE	FALSE
A*02:01	FLLPDGLVRL	10	3	0.912284	Protein	A2RRP1-2;A2RRP1;G1UI26	FLLDGLVRL	6.63	0.023	0.066	TRUE	FALSE	FALSE
A*02:01	FLLPGHTRL	9	2	0.612439	Protein	Q9NUJ3;E9PJ55;B3KQZ4	FLLPGHTRL	7.49	0.01	0.08	TRUE	FALSE	FALSE
A*02:01	FLLPHPGLKV	10	14	0.962907	Protein	A0A0S2Z5A2;B7Z2H0;Q8NHH9;Q8NHH9-3;A0A0S2Z5B0	FLLPHPLKV	9.4	0.035	0.118	TRUE	FALSE	FALSE
A*02:01	FLLPHPGLKVA	11	2	0.752042	Protein	Q8WXF7;Q8NHH9-5;A0A0S2Z5B4;A0A0S2Z5B0;H7C3A2	FLLPGLKVA	166.72	0.701	1.496	TRUE	FALSE	FALSE
A*02:01	FLLPHPGLQV	10	3	0.850699	Protein	Q6DD88;F5H6I7;B4DXC4	FLLPHPLQV	6.62	0.021	0.066	TRUE	FALSE	FALSE
A*02:01	FLLPIKTVGV	10	3	0.555933	Protein	A0A140VJK6;B4DUT7;P49915;Q53F90;P49915-2	FLLPKTVGV	4.17	0.069	0.02	TRUE	FALSE	FALSE
A*02:01	FLLPILSQI	9	4	0.907288	Non-coding	NR_136720-3;NR_136716-1;NR_136720-1;NR_136724-4;NR_136724-2	FLLPILSQI	4.08	0.01	0.019	TRUE	FALSE	FALSE
A*02:01	FLLPKVQSI	9	3	0.875415	Protein	A2VDJ0-6;A2VDJ0-3;H0Y2M0;A2VDJ0-5;A2VDJ0	FLLPKVQSI	4.51	0.002	0.026	TRUE	FALSE	FALSE
A*02:01	FLLPKVQSIQL	11	3	0.757901	Protein	A2VDJ0-6;A2VDJ0;H0Y2M0;A2VDJ0-3;A2VDJ0-5	FLLPQSIQL	27.8	0.044	0.411	TRUE	FALSE	FALSE
A*02:01	FLLPLIIVL	9	1	0.792571	Protein	Q95460-2;Q95460-5;Q95460;Q95460-4;Q95460-3	FLLPLIIVL	6.47	0.024	0.063	TRUE	FALSE	FALSE
A*02:01	FLLPLLIEKV	10	4	0.947499	Protein	Q96T76-5;Q5T454;Q96T76-8;Q96T76-7;Q96T76-9	FLLPLLIEV	4.72	0.158	0.029	TRUE	FALSE	FALSE
A*02:01	FLLPLRIAL	9	4	0.919072	Protein	Q86UL3;E5RIA1	FLLPLRIAL	8.07	0.043	0.091	TRUE	FALSE	FALSE
A*02:01	FLLPTGVYL	9	1	0.760917	Protein	A0A2K8FKT1;O00329;Q1WIR0;A0A2K8FKQ1;Q1WIQ9	FLLPTGVYL	4.71	0.015	0.029	FALSE	FALSE	FALSE
A*02:01	FLLPVAVKL	9	3	0.964351	Protein	O95202-3;O95202-2;O95202;D3DVQ1	FLLPVAVKL	6.89	0.006	0.071	TRUE	FALSE	FALSE
A*02:01	FLLPVINEM	9	1	0.787331	Protein	B3KQA0;B4DTJ7;A0A087WTY9;B4E1T3;Q96HT8	FLLPVINEM	5.73	0.013	0.052	TRUE	FALSE	FALSE
A*02:01	FLLQDSGRILQL	12	1	0.642392	Protein	A0A087X295;Q9H9M3;Q6AZD6;B4DLP3;B4E256	FLLQDSLQL	28.74	0.448	0.424	TRUE	FALSE	FALSE
A*02:01	FLLQHQTFL	9	3	0.842437	Protein	Q8NF91;H0Y325;H0Y326;Q7RTM4;B3KV58	FLLQHQTFL	5.25	0.019	0.039	TRUE	FALSE	FALSE
A*02:01	FLLQIKDR	8	2	0.803373	Protein	B4DLU8;B4DQC6;A4QPH2-4;B4E041;B4DSG9	FLLQIKDR-	28362.2	23.964	39.565	FALSE	FALSE	FALSE
A*02:01	FLLQINDILL	10	2	0.833344	Protein	Q86X10-3;B4E2E8;Q86X10;Q86X10-4;G1UI28	FLLQNDILL	11.6	0.43	0.156	TRUE	FALSE	FALSE
A*02:01	FLLQLHWRL	9	2	0.635786	Protein	A0A0U5J4P8;O43557	FLLQLHWRL	4.72	0.054	0.029	TRUE	FALSE	FALSE
A*02:01	FLLRVGADPAL	11	1	0.64262	Protein	Q00653;A0A1P8C958;Q00653-4	FLLGADPAL	33.47	0.443	0.481	TRUE	FALSE	FALSE
A*02:01	FLLTIENEL	9	6	0.923114	Protein	Q96Q89-3;Q96Q89-2;Q96Q89-4;D3DR32;Q96Q89	FLLTIENEL	8.03	0.04	0.09	TRUE	FALSE	FALSE
A*02:01	FLMDFIHQV	9	8	0.944074	Protein	B4E3T7;Q8WUM0;A0A024R3R6;B4E206	FLMDFIHQV	1.49	0	0.003	TRUE	FALSE	FALSE
A*02:01	FLMQYPGRSL	10	1	0.791031	Protein	A0A1W2PRR2;A0A087WXU8;Q9GZR7;G3V529;F5GYL3	FLMQYPRSL	36.63	0.769	0.516	TRUE	FALSE	FALSE
A*02:01	FLNDEVWNL	9	13	0.896493	Protein	O95825;H7C0X3;A6NND8;A6NMA8;A6NHJ8	FLNDEVWNL	2.49	0.002	0.007	TRUE	FALSE	FALSE
A*02:01	FLNDIFERI	9	1	0.957677	Protein	Q6DN03;Q6DRA6	FLNDIFERI	4.39	0.013	0.025	TRUE	FALSE	FALSE
A*02:01	FLNEDLEVKI	10	2	0.885583	Protein	Q58A51;Q59GD0;P53350;B4E083;B2R841	FLNEDLVKI	20.93	0.162	0.302	TRUE	FALSE	FALSE
A*02:01	FLNEDLNQL	9	1	0.838487	Protein	Q8WTT2;A8K905	FLNEDLNQL	4.06	0.004	0.018	FALSE	FALSE	FALSE
A*02:01	FLNEDLNQLI	10	1	0.798886	Protein	A8K905;Q8WTT2	FLNEDLNQI	12.95	0.157	0.175	FALSE	FALSE	FALSE
A*02:01	FLNGEVIRL	9	3	0.885482	Protein	Q99714-2;Q99714;A0A0S2Z410	FLNGEVIRL	6.78	0.006	0.069	TRUE	FALSE	FALSE
A*02:01	FLNKEITSV	9	3	0.762895	Protein	Q9UI10-2;H7C2L8;B4DUP5;E7ERK9;Q71US4	FLNKEITSV	3.59	0.003	0.012	TRUE	FALSE	FALSE
A*02:01	FLNKMKIMV	9	1	0.662663	Protein	P50991;B7Z9L0;B7Z2Z8;A8K3C3;P50991-2	FLNKMKIMV	11.99	0.101	0.162	TRUE	FALSE	FALSE
A*02:01	FLNNQEYVL	9	2	0.641338	Protein	K9MS24;Q01082-3;A0A087WUZ3;B2ZZ89;Q01082-2	FLNNQEYVL	7.48	0.058	0.079	FALSE	FALSE	FALSE
A*02:01	FLPDPSALQNL	11	9	0.879745	Protein	F8W733;A0A075B7D2;Q9NXR7;Q9NXR7-3;Q9NXR7-4	FLPDPLQNL	153.48	0.173	1.424	TRUE	FALSE	FALSE
A*02:01	FLPEAFDFI	9	2	0.887581	Protein	Q86X76-5;B2R8D1;Q86X76-3;B7Z410;Q86X76	FLPEAFDFI	5.1	0.184	0.035	TRUE	FALSE	FALSE
A*02:01	FLPEAPAEL	9	13	0.906391	Protein	B4DSV5;B3KXZ4;H0Y8E6;P49736;B7Z8Z6	FLPEAPAEL	8.61	0.016	0.1	TRUE	FALSE	FALSE
A*02:01	FLPETRIMTSV	11	2	0.611469	Protein	Q6I9U8;O95905-3;C9J316;B3KMT5;O95905	FLPETMTSV	27.98	0.273	0.414	TRUE	FALSE	FALSE
A*02:01	FLPLIVNTV	9	2	0.7831	Protein	Q709C8-3;Q709C8-2;Q6ZQY1;Q709C8-4;A0A3B3IU50	FLPLIVNTV	8.94	0.062	0.107	TRUE	FALSE	FALSE
A*02:01	FLPPPFPPP	9	5	0.836068	Protein	Q01844;Q01844-3;Q01844-2;C9JGE3;Q01844-6	FLPPPFPPP	526.17	0.823	2.881	TRUE	FALSE	FALSE
A*02:01	FLQEEAALKAL	11	3	0.962651	Protein	A2N8M3	FLQEEAALL	72.48	0.358	0.858	FALSE	FALSE	FALSE
A*02:01	FLQEEPGQLL	10	12	0.946414	Protein	Q9BQ83-2;Q9H5H2;Q9BQ83	FLQEEPQLL	76.79	0.12	0.894	TRUE	FALSE	FALSE
A*02:01	FLQEHNTTL	9	7	0.919395	Protein	Q9P219	FLQEHNTTL	5.46	0.006	0.046	TRUE	FALSE	FALSE
A*02:01	FLQEKGLLTI	10	2	0.834397	Protein	Q92538;Q92538-3;Q92538-2	FLQEGLLTI	13.76	0.162	0.187	FALSE	FALSE	FALSE
A*02:01	FLQEKLQEI	9	2	0.868193	Protein	P29374;P29374-2;A0A024R657;A0A024R6A2;P29374-3	FLQEKLQEI	4.92	0.004	0.032	TRUE	FALSE	FALSE
A*02:01	FLQEKSPAV	9	11	0.967723	Protein	B4DZJ6;Q14157-5;F8W726;Q14157;Q14157-1	FLQEKSPAV	3.1	0.003	0.009	TRUE	FALSE	FALSE
A*02:01	FLQEYVANL	9	1	0.804597	Protein	O14980;B4DR01;B7ZB16;B3KWD0	FLQEYVANL	3.45	0.012	0.011	TRUE	FALSE	FALSE
A*02:01	FLQLAVDKV	9	1	0.940775	Protein	Q96T76-5;H0Y746;Q96T76-8;Q96T76-9;Q96T76	FLQLAVDKV	15.47	0.179	0.215	TRUE	FALSE	FALSE
A*02:01	FLQPELVKL	9	12	0.964398	Protein	Q14997;G1UI18;Q14997-2	FLQPELVKL	10.52	0.006	0.139	TRUE	FALSE	FALSE
A*02:01	FLQPGGYHV	9	4	0.80162	Protein	Q9UNR6;E5RJH9;Q5HYI4;B4DX34;E7EVQ6	FLQPGGYHV	4.94	0.012	0.032	TRUE	FALSE	FALSE
A*02:01	FLQPGGYHVL	10	4	0.930113	Protein	Q5HYI4;Q14534;E7EVQ6;B4DX34;E5RJH9	FLQPGGYHL	42.48	0.221	0.575	TRUE	FALSE	FALSE
A*02:01	FLRNINEYL	9	3	0.775482	Protein	Q96CU9-3;Q96CU9	FLRNINEYL	10.31	0.101	0.136	TRUE	FALSE	FALSE
A*02:01	FLSAIVSSV	9	7	0.890306	Protein	P46940;A0A0J9YXZ5;B4E2M0;A4QPB0;A0A024RC65	FLSAIVSSV	2.67	0.021	0.008	TRUE	FALSE	FALSE
A*02:01	FLSDIPETV	9	1	0.709536	Protein	O43203;A0A140VJX0;A0A024R2M6;B4DEN6;P09110-2	FLSDIPETV	3.02	0.002	0.009	FALSE	FALSE	FALSE
A*02:01	FLSEEGGHVAV	11	6	0.906781	Protein	Q16877;Q66S35;B2R6L2;C9K0D8;B7Z5C3	FLSEGHVAV	28.3	0.209	0.418	FALSE	FALSE	FALSE
A*02:01	FLSEHPNVTL	10	8	0.77235	Protein	Q9UH17-3;M4VR43;F2YHL7;W0HJ78;Q9UH17-2	FLSEPNVTL	10.66	0.032	0.142	TRUE	FALSE	FALSE
A*02:01	FLSEKLERI	9	3	0.84916	Protein	A0A087X1G7;O60613	FLSEKLERI	8.02	0.015	0.09	TRUE	FALSE	FALSE
A*02:01	FLSELTQQL	9	12	0.91168	Protein	P14174;I4AY87;A6MUU8	FLSELTQQL	4.19	0.002	0.02	TRUE	FALSE	FALSE
A*02:01	FLSEVFHQA	9	3	0.855021	Protein	B2R7Y0;P05120	FLSEVFHQA	4.01	0.008	0.018	TRUE	FALSE	FALSE
A*02:01	FLSEVWNTHTL	11	1	0.852456	Protein	Q6SJ93;B4E0T6;Q6SJ93-2	FLSEVTHTL	14.07	0.056	0.191	TRUE	FALSE	FALSE
A*02:01	FLSHIPITL	9	1	0.705702	Protein	Q5BJF2;J3KT68	FLSHIPITL	4.51	0.007	0.026	TRUE	FALSE	FALSE
A*02:01	FLSLINVGL	9	3	0.748261	Protein	Q53F35;Q92688;Q92688-2	FLSLINVGL	5.13	0.112	0.036	TRUE	FALSE	FALSE
A*02:01	FLSNDTVQL	9	2	0.783179	Protein	O60926;P20273-2;A0A087WZQ4;P20273;P20273-4	FLSNDTVQL	6.1	0.013	0.057	TRUE	FALSE	FALSE
A*02:01	FLSNIFQAL	9	1	0.73867	Protein	B3KVU5;J3KND1;E9PRZ1;G1UCX3;Q96ER3	FLSNIFQAL	4.48	0.033	0.026	TRUE	FALSE	FALSE
A*02:01	FLSPQQPPLL	10	2	0.855905	Protein	Q14004-2;A0A024RA85;A0A024RA66;Q14004	FLSPQPPLL	31.25	0.111	0.456	TRUE	FALSE	FALSE
A*02:01	FLSSVIQNL	9	14	0.915558	Protein	A0A087WW66;Q99460-2;Q99460;Q05BX4;B2R6D0	FLSSVIQNL	5.55	0.009	0.05	TRUE	FALSE	FALSE
A*02:01	FLSTINVGL	9	7	0.893192	Protein	Q3KPI8;Q08AJ6;A0A384P5U2;H0YN26;Q6PKH8	FLSTINVGL	3.59	0.039	0.012	TRUE	FALSE	FALSE
A*02:01	FLSTLEHHL	9	5	0.967723	Protein	B2RA56;Q969V3-2;A0A0C4DGP7;Q969V3;K7EMW4	FLSTLEHHL	6.04	0.017	0.056	TRUE	FALSE	FALSE
A*02:01	FLSTLHEVYL	10	6	0.919671	Protein	A0A0S2Z5K3;Q9NPI6-2;A0A0S2Z5R3;Q3LIB4;Q9NPI6	FLSTHEVYL	6.97	0.405	0.072	TRUE	FALSE	FALSE
A*02:01	FLSTSIAQL	9	4	0.892474	Protein	Q99471-2;Q99471;H3BPF6	FLSTSIAQL	7.54	0.028	0.08	TRUE	FALSE	FALSE
A*02:01	FLTDMPDILL	10	3	0.846831	Protein	F8WEX7;D3DNN4;A0A024CIM4;P06276;F8WF14	FLTDMPILL	6.77	0.121	0.069	TRUE	FALSE	FALSE
A*02:01	FLTDREVRL	9	1	0.667594	Protein	D9ZGF8;E9PF63;A0A2P9DU05;D6REE7;A0A0U1RQV4	FLTDREVRL	17.38	0.028	0.251	TRUE	FALSE	FALSE
A*02:01	FLTDSNNIKEV	11	9	0.96266	Protein	Q15046-2;Q15046;Q6ZTI3	FLTDSIKEV	92.31	0.335	1.028	TRUE	FALSE	FALSE
A*02:01	FLTEFINYI	9	3	0.81475	Protein	A0A0A0MRX2;Q6UW46;Q96HY6-2;Q96HY6	FLTEFINYI	2.32	0.019	0.007	TRUE	FALSE	FALSE
A*02:01	FLTGVTTEL	9	4	0.837634	Protein	Q6AHZ1	FLTGVTTEL	6.71	0.019	0.068	TRUE	FALSE	FALSE
A*02:01	FLTKQEILL	9	2	0.853547	Protein	Q99828;A0A140VK09;Q99828-2	FLTKQEILL	15.98	0.065	0.225	TRUE	FALSE	FALSE
A*02:01	FLTRLLVHM	9	1	0.609912	Protein	Q9BSK3;P46060;B4DY16;B4E0U0;A0A024R1U0	FLTRLLVHM	19.78	0.312	0.286	FALSE	FALSE	FALSE
A*02:01	FLVDGPRVQL	10	5	0.722906	Protein	Q9BR11;A8K5I9	FLVDGPVQL	22.94	0.03	0.337	TRUE	FALSE	FALSE
A*02:01	FLVDIMEHL	9	4	0.961037	Protein	A0A096LNL1;Q7L775	FLVDIMEHL	3.92	0.008	0.016	TRUE	FALSE	FALSE
A*02:01	FLVDSQFMV	9	1	0.668316	Protein	F8W1F4;H0YI19;Q9UHW5;Q9UHW5-3;Q9UHW5-2	FLVDSQFMV	2.11	0.009	0.006	TRUE	FALSE	FALSE
A*02:01	FLVEEEDLFL	10	1	0.672091	Protein	Q9C037;B3KS62;Q9C037-3;B4DEC5;Q9C037-2	FLVEEELFL	13.21	0.244	0.179	TRUE	FALSE	FALSE
A*02:01	FLVEKQPPQV	10	4	0.920751	Protein	A0A1W2PNW1;B4DQB3;B7ZAC1;P42226;P42226-2	FLVEQPPQV	9.95	0.043	0.129	TRUE	FALSE	FALSE
A*02:01	FLVEPQEDTRL	11	1	0.809823	Protein	Q6P453;P51784;G5E9A6	FLVEPDTRL	217.39	0.215	1.754	TRUE	FALSE	FALSE
A*02:01	FLVGERVTL	9	5	0.702479	Protein	Q53YD7;P26641-2;B4DUP0;P26641	FLVGERVTL	49.93	0.124	0.655	TRUE	FALSE	FALSE
A*02:01	FLVQNIHTL	9	7	0.955355	Protein	A0JLQ5;Q8TDN6;B4E0B8	FLVQNIHTL	5.89	0.007	0.054	TRUE	FALSE	FALSE
A*02:01	FLVTVIHTL	9	4	0.854609	Protein	F8W1K6;B4DHQ7;O60486	FLVTVIHTL	5.3	0.011	0.04	TRUE	FALSE	FALSE
A*02:01	FLWDEGFHQL	10	11	0.967951	Protein	A8K9K4;Q13724-2;A0A384MDR6;A0A3B3IS52;Q58F09	FLDEGFHQL	3.15	0.005	0.009	TRUE	FALSE	FALSE
A*02:01	FLWDKRTGL	9	7	0.54874	Protein	A4D151;A4D150	FLWDKRTGL	6.89	0.021	0.071	FALSE	FALSE	FALSE
A*02:01	FLWDPAKRTSV	11	2	0.467632	Protein	Q12800-4;F8VWL0;Q12800;F8VX55;A0A024R120	FLWDPATSV	12.43	0.037	0.168	TRUE	FALSE	FALSE
A*02:01	FLWELLLWV	9	3	0.758368	Protein	A0A077JJN3	FLWELLLWV	7.01	0.21	0.073	FALSE	FALSE	FALSE
A*02:01	FLWERPTLL	9	6	0.955259	Protein	A0A087WZC1;Q6IN84;Q6IN84-2	FLWERPTLL	2.88	0.003	0.009	FALSE	FALSE	FALSE
A*02:01	FLWERPTLLV	10	5	0.944841	Protein	A0A087WZC1;Q6IN84;Q6IN84-2	FLWERPTLV	3.66	0.042	0.013	FALSE	FALSE	FALSE
A*02:01	FLWEYGDLHLF	11	3	0.78542	Protein	B4DEL6;M0R1F7;E2QRG1;Q8IV08;M0QX50	FLWEGDLHL	25.57	0.406	0.379	TRUE	FALSE	FALSE
A*02:01	FLWPGLNVPL	10	2	0.861904	Protein	B4DIW8;P82675;P82675-2	FLWPGNVPL	3.9	0.09	0.016	FALSE	FALSE	FALSE
A*02:01	FLWQEGHSAFA	11	3	0.734531	Protein	B4DP50;P07814	FLWQEGHSA	18.59	0.411	0.269	TRUE	FALSE	FALSE
A*02:01	FLWTEKFPSL	10	4	0.962948	Protein	B7Z8J2;B7Z8E3;B7Z8F8;Q6FHA6;Q6FI14	FLWEKFPSL	5.53	0.112	0.049	TRUE	FALSE	FALSE
A*02:01	FLWVGATPHL	10	1	0.829025	Protein	Q5JS54;D6REN3;D6RB92;Q5JS54-3;H7C465	FLWGATPHL	6.42	0.117	0.062	TRUE	FALSE	FALSE
A*02:01	FLYAGHIFL	9	7	0.891518	Protein	Q66K64	FLYAGHIFL	3.03	0.019	0.009	TRUE	FALSE	FALSE
A*02:01	FLYDDNQRV	9	9	0.851604	Protein	P11388-2;B4DKD0;E9PCY5;Q71UH4;Q02880-2	FLYDDNQRV	3.25	0.003	0.01	TRUE	FALSE	FALSE
A*02:01	FLYDHIQPVRA	11	7	0.856742	Protein	F2Z2U4;Q9Y4A5-2;Q59FH1;H0Y4W2;Q9Y4A5	FLYDQPVRA	9.92	0.051	0.129	TRUE	FALSE	FALSE
A*02:01	FLYDTHQNL	9	10	0.953089	Protein	P16885;A0A0A0MRF9;B4E3H3	FLYDTHQNL	5.37	0.005	0.042	FALSE	FALSE	FALSE
A*02:01	FLYFEDHGL	9	7	0.905012	Protein	A0A0S2Z5E0;A0A0S2Z5D8;H0YAA3;B4DDS4;Q9HAD4	FLYFEDHGL	4.94	0.045	0.032	TRUE	FALSE	FALSE
A*02:01	FLYIRQLAI	9	2	0.654943	Protein	Q9H9J5;B4DY21;Q9Y3T9;B3KNC3	FLYIRQLAI	16.52	0.276	0.235	TRUE	FALSE	FALSE
A*02:01	FLYKEKLVSV	10	16	0.929724	Protein	B3KYA4;A0A0A0MT68;Q13609;A0A024R365;C9J9N0	FLYEKLVSV	3.89	0.026	0.016	TRUE	FALSE	FALSE
A*02:01	FLYKVVQV	8	9	0.931545	Protein	Q9BXS5;E7ENJ6;K7EQ90;K7ER75;A0A024R7K8	FLY-KVVQV	59.87	0.124	0.751	TRUE	FALSE	FALSE
A*02:01	FLYPFLHTV	9	7	0.949819	Protein	Q92600;B2RE59;Q92600-2;D5MQE1;Q92600-3	FLYPFLHTV	1.93	0.001	0.005	TRUE	FALSE	FALSE
A*02:01	FLYPFLSHL	9	1	0.877614	Protein	Q9BXX0;Q8N5L1	FLYPFLSHL	3.47	0.007	0.011	FALSE	FALSE	FALSE
A*02:01	FLYPFPLAL	9	4	0.88239	Non-coding	NR_028491-3;NR_028491-2;NR_028491-5;NR_028491-1;NR_028491-4	FLYPFPLAL	2.87	0.003	0.009	TRUE	FALSE	FALSE
A*02:01	FLYPFPLALF	10	1	0.783848	Protein	Q5BJD5;B4E0E0;E9PJ42	FLYPFPLAL	13.27	0.521	0.179	TRUE	FALSE	FALSE
A*02:01	FLYQYSTRL	9	1	0.934592	Protein	A0A024R9G3;Q9BUN8-2;Q9BUN8	FLYQYSTRL	5.95	0.023	0.055	TRUE	FALSE	FALSE
A*02:01	FLYSDEVQI	9	1	0.708652	Protein	Q9H0C5-2;A0A087WY57;Q9H0C5;Q9BX70;A0A024R224	FLYSDEVQI	6.19	0.016	0.058	TRUE	FALSE	FALSE
A*02:01	FLYSLLMKL	9	1	0.963242	Protein	A0A024R4X0;P00387;P00387-3	FLYSLLMKL	5.05	0.026	0.034	TRUE	FALSE	FALSE
A*02:01	FLYWHLEDL	9	1	0.671075	Protein	H7C0X2;Q6ZSS7	FLYWHLEDL	6.08	0.136	0.057	TRUE	FALSE	FALSE
A*02:01	FMATIAEGL	9	9	0.870812	Protein	K7EMM8;Q49A26-5;Q49A26-4;D3DUE7;Q49A26-3	FMATIAEGL	5.18	0.182	0.037	TRUE	FALSE	FALSE
A*02:01	FMDPQKMPYL	10	3	0.909997	Protein	A0A1B0GTC3;A0A1B0GU26;A0A1B0GUC3;B3KU60;A0A1B0GTY1	FMDPQMPYL	7.05	0.06	0.074	TRUE	FALSE	FALSE
A*02:01	FMFDEKLVTV	10	12	0.940742	Protein	O00743;O00743-2;O00743-3;B7Z3E2;A0A024R861	FMFDKLVTV	2.89	0.019	0.009	TRUE	FALSE	FALSE
A*02:01	FMFGQKLNV	9	2	0.909852	Protein	M0QXS5;M0QYT0;A0A384N6C7;P14866;P14866-2	FMFGQKLNV	4.1	0.02	0.019	TRUE	FALSE	FALSE
A*02:01	FMFQEALKL	9	2	0.967723	Protein	A0A075B7A9;P43362;A0A075B794	FMFQEALKL	8.9	0.038	0.107	TRUE	FALSE	FALSE
A*02:01	FMIDASVHPTL	11	7	0.796267	Protein	Q7L8P3;P86791;B4DJD2;P86790	FMIDASPTL	13.03	0.131	0.176	TRUE	FALSE	FALSE
A*02:01	FMLETVDSVKL	11	7	0.96265	Protein	E5RG77;A8K520;E5RFX7;D3DSW3;H0YBG2	FMLEDSVKL	16.1	0.117	0.228	TRUE	FALSE	FALSE
A*02:01	FMLGNYINL	9	2	0.692284	Protein	C9JPJ0;B2R5Q5;H7C1K6;Q53G44;Q53G44-2	FMLGNYINL	4.18	0.097	0.02	TRUE	FALSE	FALSE
A*02:01	FMLPDPQNISL	11	5	0.790928	Protein	Q8WW01;B1ALV0	FMLPDPISL	19.9	0.055	0.288	TRUE	FALSE	FALSE
A*02:01	FMLTQPHSV	9	2	0.610059	Protein	Q96JD0;P01721;Q96JD2;Q96JD1;Q5NV88	FMLTQPHSV	3.38	0.006	0.01	FALSE	FALSE	FALSE
A*02:01	FMNPHLISV	9	2	0.923449	Protein	Q9UG01;B4DS51;Q9UG01-2;F5GZ56;B3KP68	FMNPHLISV	2.05	0.001	0.006	FALSE	FALSE	FALSE
A*02:01	FMQDPMEIFV	10	2	0.738601	Protein	Q13838-2;A0A140T9X9;A0A140T996;A0A0G2JJZ9;A0A140T9X3	FMQDPEIFV	3.89	0.152	0.016	TRUE	FALSE	FALSE
A*02:01	FMQDPMEVFV	10	3	0.686404	Non-coding	NR_046366-9;NR_046366-3;NR_046366-2;NR_046366-6;NR_046366-4	FMQDPEVFV	4.02	0.148	0.018	TRUE	FALSE	FALSE
A*02:01	FMTTNVPNV	9	5	0.757121	Protein	P35611-3;P35611-4;E7EV99;Q96D30;P35611	FMTTNVPNV	4.68	0.052	0.028	TRUE	FALSE	FALSE
A*02:01	FMVEKGPTL	9	6	0.746785	Protein	Q8N2K1;Q8N2K1-3;A0A024R075;B1AMF0;A6NGS0	FMVEKGPTL	8.6	0.019	0.1	TRUE	FALSE	FALSE
A*02:01	FMYNFQLVTL	10	1	0.728339	Protein	B3KN05;F5GWH2;O95573;A0A024R497;B2RBE0	FMYNQLVTL	6.2	0.376	0.058	TRUE	FALSE	FALSE
A*02:01	FQANNDATEVV	11	1	0.613328	Protein	O60462-6;O60462;O60462-3;B7ZL68;Q7Z3T9	FQADATEVV	1372.26	2.797	4.768	FALSE	FALSE	FALSE
A*02:01	FQDEINWRL	9	1	0.96661	Protein	Q6P453;P51784;G5E9A6	FQDEINWRL	7.69	0.026	0.083	TRUE	FALSE	FALSE
A*02:01	FQDENHLYL	9	1	0.627451	Protein	Q86XZ8;A0A0U1RRC3;A0A024R6N2;Q9Y5S2	FQDENHLYL	10.34	0.031	0.136	FALSE	FALSE	FALSE
A*02:01	FQDENYLYL	9	3	0.838332	Protein	Q59FU6;E5KR05;X5D8Z6;Q09013-1;E5KR06	FQDENYLYL	8.29	0.042	0.095	TRUE	FALSE	FALSE
A*02:01	FQDPVPLTV	9	15	0.911928	Protein	A0A024R784;O15164;O15164-2;B4DYZ9	FQDPVPLTV	15.71	0.007	0.22	TRUE	FALSE	FALSE
A*02:01	FQFVGIENIHV	11	1	0.949886	Protein	Q9Y217;Q9Y217-2	FQFVGNIHV	309.7	1.961	2.141	TRUE	FALSE	FALSE
A*02:01	FQHEENLLQQV	11	3	0.771951	Protein	Q14669;Q14669-3;Q57Z94;Q14669-4;Q14669-2	FQHEELQQV	632.94	0.756	3.184	TRUE	FALSE	FALSE
A*02:01	FQIGPVAGV	9	4	0.80599	Protein	Q14246-4;A8K653;Q14246;Q14246-2;B2R8T0	FQIGPVAGV	6.37	0.088	0.061	TRUE	FALSE	FALSE
A*02:01	FQIRNLPSL	9	3	0.819684	Protein	Q8N999;Q8N999-3	FQIRNLPSL	14.75	0.137	0.2	FALSE	FALSE	FALSE
A*02:01	FQLPIRFNL	9	3	0.750327	Protein	B7ZLP8;P26639;P26639-2;B4DKZ9;Q53GX7	FQLPIRFNL	37.84	0.302	0.529	FALSE	FALSE	FALSE
A*02:01	FQTDLIYNL	9	2	0.845115	Protein	Q9UIQ6-2;Q9UIQ6;Q9UIQ6-3;B2RAK1	FQTDLIYNL	9.4	0.064	0.118	TRUE	FALSE	FALSE
A*02:01	FTAEFLEKV	9	2	0.967723	Protein	B2RDX0;A0A024R6R1;A8K7Z9;Q8NEM2	FTAEFLEKV	8.32	0.051	0.095	TRUE	FALSE	FALSE
A*02:01	FTSLGSFIVI	10	3	0.727527	Protein	Q8NCR9	FTLGSFIVI	704.76	10.059	3.373	FALSE	FALSE	TRUE
A*02:01	FTVPRVVAV	9	5	0.789328	Protein	H0Y4W2;Q9Y4A5-2;Q9Y4A5;F2Z2U4;A0A2R8YFJ4	FTVPRVVAV	35.87	0.125	0.508	FALSE	FALSE	FALSE
A*02:01	FVDDYTVRV	9	2	0.866897	Protein	C9JW37;Q4ZG77;A0A140VKF2;O00487	FVDDYTVRV	8.76	0.012	0.103	TRUE	FALSE	FALSE
A*02:01	FVDGLTFKV	9	4	0.967723	Protein	Q5JR04;Q9HCE1;B7Z700;Q9H8T8;Q9HCE1-2	FVDGLTFKV	6.53	0.037	0.064	TRUE	FALSE	FALSE
A*02:01	FVDKTVLPFV	10	5	0.779916	Protein	Q59H50;P05107;J3KNI6;P26010;P26010-2	FVDKTLPFV	32.28	1.047	0.468	TRUE	FALSE	TRUE
A*02:01	FVDPNGKISL	10	2	0.919016	Protein	Q92538;Q92538-3;Q92538-2	FVDPGKISL	1005.37	0.463	4.067	TRUE	FALSE	TRUE
A*02:01	FVEEEEHFL	9	3	0.895729	Protein	A0A1X7SBW3;Q5TA31	FVEEEEHFL	268.7	0.371	1.967	FALSE	FALSE	FALSE
A*02:01	FVFDRPLPVS	10	3	0.941239	Protein	B4E0X6;F5GX11;P25786-2;B4DEV8;P25786	FVFDRPLPV	82.02	2.412	0.942	TRUE	FALSE	FALSE
A*02:01	FVFPGELLL	9	4	0.879068	Protein	Q71UA6;Q59ES3;Q15758	FVFPGELLL	13.05	0.046	0.176	TRUE	FALSE	FALSE
A*02:01	FVFSFPVSV	9	1	0.771128	Protein	Q13649;Q13115;Q13115-2	FVFSFPVSV	3.6	0.015	0.012	TRUE	FALSE	FALSE
A*02:01	FVIDLQTRL	9	3	0.924506	Protein	B4E1M7;E1P5S2;Q6MZY7;B4DLM0;B7Z4L7	FVIDLQTRL	77.43	0.09	0.899	TRUE	FALSE	FALSE
A*02:01	FVIPVVQAL	9	2	0.826341	Protein	F1T0L5;Q8N8A6	FVIPVVQAL	39.46	0.054	0.546	TRUE	FALSE	FALSE
A*02:01	FVLDKVPFL	9	1	0.836018	Protein	A8K5D9;Q9NQW6;H7C3S1;A0A024RA49;B4DSL6	FVLDKVPFL	6.76	0.011	0.069	FALSE	FALSE	FALSE
A*02:01	FVLPELPSV	9	3	0.937955	Protein	B4DXC9;P53990-4;P53990;P53990-5;J3KR23	FVLPELPSV	4.2	0.004	0.02	TRUE	FALSE	FALSE
A*02:01	FVLPVATQI	9	2	0.825364	Protein	Q99622;U3KQ85;U3KQ07	FVLPVATQI	84.96	0.164	0.968	TRUE	FALSE	FALSE
A*02:01	FVMEGEPPKL	10	3	0.64233	Protein	E9PLG0;Q17RS7;E9PM30	FVMEGPPKL	32.96	0.166	0.476	TRUE	FALSE	FALSE
A*02:01	FVMETFVHL	9	8	0.958733	Protein	Q9BVK8;Q9BVK8-2	FVMETFVHL	5.45	0.033	0.045	TRUE	FALSE	FALSE
A*02:01	FVPDTPVGV	9	1	0.848826	Protein	A0A2R8Y7T6;A0A087WWK8;A0A2R8Y695;Q6DN90-2;B4DGC5	FVPDTPVGV	31.58	0.064	0.459	TRUE	FALSE	FALSE
A*02:01	GAGVVGIVNI	10	5	0.787469	Protein	Q86VD1;Q86VD1-2	GAVVGIVNI	18061.7	28.593	23.609	FALSE	FALSE	TRUE
A*02:01	GDITSFLLSV	10	1	0.6283	Protein	A0A3B3ISW6;V9GYE7;A0A3B3IS28;A0A3B3IS00;A0A3B3IRW0	GITSFLLSV	68.55	2.578	0.823	FALSE	FALSE	TRUE
A*02:01	GFTILPAIL	9	1	0.723357	Protein	Q8TDB8-2;Q8TDB8-4;B7Z966;Q8TDB8-5;B7Z5J8	GFTILPAIL	19155.1	23.236	24.995	FALSE	FALSE	TRUE
A*02:01	GGDHLVLLNV	10	1	0.534285	Protein	Q5SQH4;B4DZ28;O60231;A0A140T8Y5;Q5SQH5	GGDHVLLNV	12180.4	17.284	16.978	FALSE	FALSE	TRUE
A*02:01	GIFGGHIRSV	10	14	0.681894	Protein	Q14694;Q14694-2;Q14694-3;H3BNA1	GIFGGHISV	113.41	0.466	1.174	TRUE	FALSE	TRUE
A*02:01	GIIDGVIQMV	10	1	0.721523	Protein	Q8NHB1;A0A126GWQ1;A0A2R8Y893	GIIDGVIQV	74.96	0.119	0.879	TRUE	FALSE	FALSE
A*02:01	GILGIQPPSV	10	6	0.812599	Protein	Q9UPN6;B7Z876;Q9UPN6-2;B7Z3A4;A0A0A0MT33	GILGIPPSV	115.59	0.414	1.187	TRUE	FALSE	FALSE
A*02:01	GILLRLPQV	9	2	0.866419	Protein	Q96S94-4;Q9UK58;Q9UK58-6;Q96S94-5;Q9UK58-4	GILLRLPQV	43.45	0.162	0.584	FALSE	FALSE	FALSE
A*02:01	GILPMVPEV	9	1	0.799149	Protein	B3KRE0;Q59F99;O95793-2;A0A087X1A5;B4DPJ9	GILPMVPEV	10.31	0.023	0.136	TRUE	FALSE	FALSE
A*02:01	GILTKELLHSV	11	3	0.940376	Protein	Q9Y217;Q92792	GILELLHSV	117.17	0.613	1.197	TRUE	FALSE	FALSE
A*02:01	GINLLVAAL	9	1	0.767856	Protein	A0A0A8IKZ2;Q02094;A0A023UN48;A0A2R8YEH1;Q9UK70	GINLLVAAL	838.7	2.805	3.702	FALSE	FALSE	TRUE
A*02:01	GKDWSPTLYI	10	1	0.712829	Protein	P43304-2;B7Z601;Q53T76;A0A140VJK2;A8K1Z2	GKWSPTLYI	15571.5	17.245	20.665	FALSE	FALSE	FALSE
A*02:01	GKEFDAILI	9	2	0.757066	Non-coding	NR_147240-8;NR_147240-7;NR_147240-9;NR_147240-3;NR_147240-5	GKEFDAILI	34391.5	52.667	54.073	FALSE	FALSE	TRUE
A*02:01	GLAAFRAFL	9	4	0.895785	Protein	P41220-4;P41220-2;P41220-3;P41220;A0A024R939	GLAAFRAFL	21.04	0.523	0.304	TRUE	FALSE	FALSE
A*02:01	GLAAGGIVAV	10	8	0.779466	Protein	Q9ULH7-4;Q9ULH7-5;Q9ULH7	GLAGGIVAV	22.04	0.159	0.322	TRUE	FALSE	FALSE
A*02:01	GLADASLLKKV	11	6	0.917152	Protein	Q9NTC6;Q9UBB4-2;B1AHE3;Q9UBB4	GLADASLKV	105.14	0.287	1.12	TRUE	FALSE	FALSE
A*02:01	GLADITQQL	9	3	0.88388	Protein	J3QSD7;Q9NYV4;Q9NYV4-3;Q9NYV4-2	GLADITQQL	14.01	0.008	0.19	TRUE	FALSE	FALSE
A*02:01	GLADKVYFL	9	4	0.917999	Protein	Q53SY7;F8VPD4;P27708	GLADKVYFL	3.87	0.006	0.015	TRUE	FALSE	FALSE
A*02:01	GLADNTVIAKV	11	9	0.954341	Protein	P26639;P26639-2;Q53GX7;B3KTN2;Q5M7Z9	GLADVIAKV	74.22	0.133	0.872	FALSE	FALSE	FALSE
A*02:01	GLAEILVLV	9	2	0.750736	Protein	Q9UJP4;Q9UJP4-2	GLAEILVLV	4.15	0.008	0.02	TRUE	FALSE	FALSE
A*02:01	GLAKLIADV	9	2	0.906588	Protein	P39748;Q6FHX6;F5H1Y3	GLAKLIADV	24.06	0.264	0.356	TRUE	FALSE	FALSE
A*02:01	GLAPHLEQI	9	7	0.932921	Non-coding	NR_051979-7;NR_051979-14;NR_051979-16;NR_051979-13;NR_051979-11	GLAPHLEQI	17.15	0.02	0.247	TRUE	FALSE	FALSE
A*02:01	GLAPKPVQV	9	3	0.924538	Protein	Q6ZNJ1-3;Q6ZNJ1-2;B4DVX0;B4DDY6;Q6ZNJ1	GLAPKPVQV	30.8	0.008	0.45	TRUE	FALSE	FALSE
A*02:01	GLAPLHIQL	9	3	0.910946	Protein	P09131;A0A0A0MS43;Q5HY78	GLAPLHIQL	24.75	0.028	0.367	TRUE	FALSE	FALSE
A*02:01	GLAPPQHLIRV	11	4	0.874098	Protein	S5M207;P04637-7;E5RMA8;H6U5S4;S5M224	GLAPPLIRV	90.32	0.145	1.013	TRUE	FALSE	FALSE
A*02:01	GLATDVQTV	9	3	0.862707	Protein	A0A384NL22;A0A087WUL2;A0A087WY10;P49720;A0A087WXQ8	GLATDVQTV	21.74	0.029	0.317	TRUE	FALSE	FALSE
A*02:01	GLDDIKDLKV	10	1	0.801572	Protein	B3KQ43;Q9HCE1;B7Z700;Q5JR04	GLDDIKLKV	272.79	0.257	1.981	TRUE	FALSE	FALSE
A*02:01	GLDDLLLFL	9	3	0.824632	Protein	B4DL70;Q9UNS1-2;Q9UNS1	GLDDLLLFL	8.49	0.02	0.098	TRUE	FALSE	FALSE
A*02:01	GLDELFVQV	9	2	0.824526	Protein	Q9HCN4-2;Q53RZ9;Q9HCN4-3;Q9HCN4-5;Q9HCN4	GLDELFVQV	6.71	0.005	0.068	TRUE	FALSE	FALSE
A*02:01	GLDIPTVQV	9	7	0.898128	Protein	Q9Y6V7;A8K7A1	GLDIPTVQV	119.95	0.066	1.215	TRUE	FALSE	FALSE
A*02:01	GLDNAVSLFQV	11	3	0.742229	Protein	B2RAX6;Q9Y5J1;F6VJE8	GLDNSLFQV	63.51	0.493	0.781	TRUE	FALSE	FALSE
A*02:01	GLDNINVFL	9	1	0.767677	Protein	Q8WWI1-3;E9PMP7;F8J2B5;Q8WWI1-2;A0A1P7ZIM8	GLDNINVFL	11.42	0.051	0.154	TRUE	FALSE	FALSE
A*02:01	GLDPLGYEIQL	11	2	0.751485	Protein	B3KMK0;P57740-2;P57740-3;P57740	GLLGYEIQL	122.71	0.239	1.233	TRUE	FALSE	FALSE
A*02:01	GLDPQGDRSFL	11	5	0.900926	Protein	C9J7X6;A4D1U4	GLDPQGSFL	3499.08	1.32	7.831	TRUE	FALSE	FALSE
A*02:01	GLDSYLPEL	9	10	0.932099	Protein	A0A088AWN3;Q9BZ29-3;Q9BZ29-5;A0A0A0MSY4;A0A0D9SFH5	GLDSYLPEL	9.36	0.017	0.117	TRUE	FALSE	FALSE
A*02:01	GLFDQHFRL	9	2	0.765253	Protein	Q9Y2I1;Q9Y2I1-2;B3KNF9;B3KNE4;B4DMW1	GLFDQHFRL	4.79	0.01	0.029	TRUE	FALSE	FALSE
A*02:01	GLFDQQLAL	9	1	0.832922	Non-coding	NR_137636-3;NR_137636-2;NR_137636-1;NR_137636-4;NR_137636-5	GLFDQQLAL	8.62	0.01	0.1	TRUE	FALSE	FALSE
A*02:01	GLFPWTPKL	9	6	0.912691	Protein	Q8NI35-2;A0A2R8Y549;A0A0U1RR46;Q8NI35-4;A0A087WUZ6	GLFPWTPKL	8.18	0.008	0.093	TRUE	FALSE	FALSE
A*02:01	GLFQGKTPL	9	6	0.922889	Protein	Q643R0;Q9ULW0-2;Q9ULW0	GLFQGKTPL	54.62	0.21	0.705	TRUE	FALSE	FALSE
A*02:01	GLFSAKLFL	9	8	0.923812	Protein	Q14C86-2;A0A024R8A2;B4DGD8;Q14C86-4;A0A0A0MQV8	GLFSAKLFL	11.16	0.085	0.15	TRUE	FALSE	FALSE
A*02:01	GLFTLSHITQL	11	3	0.908866	Protein	B0YJ73;Q15404	GLFSHITQL	116.55	0.219	1.193	TRUE	FALSE	FALSE
A*02:01	GLGEGFQTVRV	11	4	0.879331	Protein	O75143-3;O75143-2;O75143;O75143-4;A8K0S6	GLGEGFQTV	235.73	0.347	1.837	TRUE	FALSE	FALSE
A*02:01	GLGPTFKL	8	4	0.91978	Protein	B4DH75;E7EQH1;Q4G0L2;Q8NFJ9;Q8NFJ9-2	GL-GPTFKL	2643.19	1.483	6.713	TRUE	FALSE	FALSE
A*02:01	GLHFVVPSV	9	1	0.815036	Protein	Q6P1X5	GLHFVVPSV	13.66	0.062	0.185	TRUE	FALSE	FALSE
A*02:01	GLHNVVYGI	9	4	0.807017	Protein	A5YKK6-4;A5YKK6-3;A5YKK6;A5YKK6-2	GLHNVVYGI	19.99	0.26	0.289	TRUE	FALSE	FALSE
A*02:01	GLHSYFITV	9	3	0.825991	Protein	D6RCC7;D6RC17;Q9P2D6-4;Q9P2D6-2;Q9P2D6-3	GLHSYFITV	6.85	0.034	0.071	TRUE	FALSE	FALSE
A*02:01	GLIDEIYGI	9	4	0.834017	Protein	F5H2X5;Q96AX1;A0A2R8Y5U3;B2RDH6;H3BMM5	GLIDEIYGI	3.42	0.009	0.01	TRUE	FALSE	FALSE
A*02:01	GLIDENPGL	9	6	0.922617	Protein	P78527;P78527-2	GLIDENPGL	13.29	0.021	0.18	TRUE	FALSE	FALSE
A*02:01	GLIDFAIQL	9	1	0.821397	Protein	Q93074-2;Q86YW9;Q93074-3;B7ZMI1;B4DYQ3	GLIDFAIQL	5.84	0.007	0.054	TRUE	FALSE	FALSE
A*02:01	GLIDIENPNRV	11	1	0.751643	Protein	Q13442	GLIDIPNRV	81.41	0.185	0.936	TRUE	FALSE	FALSE
A*02:01	GLIDKVNEL	9	5	0.939708	Protein	B4DDS7;G3V4F7;P61011;P61011-2	GLIDKVNEL	12.28	0.007	0.166	TRUE	FALSE	FALSE
A*02:01	GLIDRQVTV	9	1	0.620512	Protein	Q9UPN3;H3BQK9;Q9UPN3-5;H3BPE1	GLIDRQVTV	9.88	0.007	0.128	FALSE	FALSE	FALSE
A*02:01	GLIDVHVHL	9	13	0.967723	Protein	Q53SY7;H7C3Z5;F8VPD4;P27708	GLIDVHVHL	9.2	0.01	0.113	TRUE	FALSE	FALSE
A*02:01	GLIEILKKV	9	7	0.918071	Protein	O14737;K7EQA1	GLIEILKKV	10.95	0.01	0.147	TRUE	FALSE	FALSE
A*02:01	GLIEKNIEL	9	6	0.908372	Protein	P26358-2;P26358;I6L9H2;Q59FP7;P26358-3	GLIEKNIEL	11.26	0.009	0.151	TRUE	FALSE	FALSE
A*02:01	GLIEWLENTV	10	2	0.921738	Protein	P78527	GLIEWLNTV	5.5	0.101	0.048	TRUE	FALSE	FALSE
A*02:01	GLIGVGLINV	10	1	0.845443	Protein	A3KN83;A3KN83-3;B3KUC1;A3KN83-2	GLIGGLINV	9.53	0.079	0.121	TRUE	FALSE	FALSE
A*02:01	GLIPIHADPRL	11	14	0.906963	Protein	E7EQB9;A0A2R8YEY5;A0A2R8YEZ4;D6RDJ3;H0Y723	GLIPIDPRL	499.96	0.354	2.805	TRUE	FALSE	FALSE
A*02:01	GLISFSDYIFL	11	2	0.756688	Protein	S4R3D7;A0A0U1RRK1;A0A286YF11;Q9BPX6-3;F6XEV2	GLFSDYIFL	51.43	0.847	0.672	FALSE	FALSE	FALSE
A*02:01	GLKNGVPAV	9	9	0.753638	Protein	A0A3B3ITI7;A0A3B3ISC6;P53621;A0A3B3IT15;P53621-2	GLKNGVPAV	51.92	0.09	0.677	TRUE	FALSE	FALSE
A*02:01	GLLAGDRLVEV	11	8	0.951658	Protein	J3QRP6;B2R6A3;O14745	GLLDRLVEV	18.75	0.097	0.272	TRUE	FALSE	FALSE
A*02:01	GLLAKIFEL	9	6	0.93859	Protein	Q53EZ4-2;H0Y432;Q53EZ4	GLLAKIFEL	4.14	0.011	0.019	TRUE	FALSE	FALSE
A*02:01	GLLDAVTYL	9	1	0.795409	Protein	M0R1B4;Q8IUP3;Q9UP65;Q9UP65-3;Q9UP65-2	GLLDAVTYL	3.91	0.006	0.016	TRUE	FALSE	FALSE
A*02:01	GLLDNVTVLI	10	1	0.675821	Protein	B7Z9J7;V9HWF9;A6NF51;F8VZG4;O95861-4	GLLDNVVLI	25.16	0.316	0.373	FALSE	FALSE	FALSE
A*02:01	GLLDPNVKSIFV	12	6	0.737244	Protein	O43414;F6UGJ8;B4DEX5;B4DN03;A0A3B3ISV9	GLLDPNVKV	28.74	0.235	0.424	TRUE	FALSE	FALSE
A*02:01	GLLEDAETKNVAL	13	4	0.92839	Protein	Q8IVF7;F8W1F5;Q8IVF7-2;Q8IVF7-3	GLLEDNVAL	148.51	0.772	1.396	TRUE	FALSE	FALSE
A*02:01	GLLEEAYTL	9	3	0.920243	Protein	Q9BZQ8;A0A024R978	GLLEEAYTL	6.47	0.012	0.063	TRUE	FALSE	FALSE
A*02:01	GLLEIVTSV	9	5	0.897432	Protein	B9EK47;Q9P2D3-3;Q9P2D3-2;Q9P2D3	GLLEIVTSV	3.94	0.004	0.017	TRUE	FALSE	FALSE
A*02:01	GLLEKLTAI	9	1	0.772753	Protein	B4DYT3;A4PBF7;Q92750;J3KTH2	GLLEKLTAI	7.71	0.016	0.084	TRUE	FALSE	FALSE
A*02:01	GLLENIPRV	9	8	0.955399	Protein	B4DJ93;Q59HH3;Q3B7A7;P22102	GLLENIPRV	3.89	0.002	0.016	TRUE	FALSE	FALSE
A*02:01	GLLENIRQL	9	5	0.945378	Protein	A0A087X011;J3KPF9;E9PES4;B4DHG8;Q2UVF2	GLLENIRQL	25.59	0.024	0.38	TRUE	FALSE	FALSE
A*02:01	GLLESRLDPYL	11	1	0.566755	Protein	Q9UJX6-2;Q9UJX6;B4DGH7;B4DJR9	GLLESDPYL	33.32	0.15	0.48	TRUE	FALSE	FALSE
A*02:01	GLLETTVQKV	10	3	0.946871	Protein	O43290;B4DDH9	GLLETTVQV	24.4	0.068	0.361	TRUE	FALSE	FALSE
A*02:01	GLLGAGGTVSV	11	3	0.836955	Protein	Q3ZCQ8;A0A024R0M6;M0R047;Q0VAB1;M0R2D2	GLLGGTVSV	36.69	0.109	0.517	FALSE	FALSE	FALSE
A*02:01	GLLGDIAIHL	10	10	0.959938	Protein	A0A1X7SBU6;Q8WXG9	GLLGDIIHL	18.77	0.072	0.272	TRUE	FALSE	FALSE
A*02:01	GLLGTLVQL	9	6	0.878127	Protein	A0A2R8Y7Z0;A0A2R8Y5C3;A0A2R8Y543;A0A2R8Y6G0;A0A2R8Y804	GLLGTLVQL	11.09	0.018	0.149	TRUE	FALSE	FALSE
A*02:01	GLLGYLHFV	9	11	0.942533	Protein	B4DEE2;H0YKI1;H0YMV4;Q14442;H0YLY9	GLLGYLHFV	2.34	0.01	0.007	TRUE	FALSE	FALSE
A*02:01	GLLKVVPQA	9	1	0.775475	Protein	B4DVK6;A1A4G1;Q5T447;Q5T447-2	GLLKVVPQA	37.89	0.065	0.53	TRUE	FALSE	FALSE
A*02:01	GLLLEGLLL	9	2	0.881507	Protein	B4DNL0	GLLLEGLLL	156.2	0.562	1.44	FALSE	FALSE	FALSE
A*02:01	GLLLLVPLL	9	1	0.891299	Protein	H3BTH8	GLLLLVPLL	17.77	0.205	0.257	FALSE	FALSE	FALSE
A*02:01	GLLNNIAEV	9	3	0.78541	Protein	Q6WRX3;Q9C0D3;Q6WRX3-2;B3KTI5	GLLNNIAEV	5.51	0.024	0.048	TRUE	FALSE	FALSE
A*02:01	GLLNRPNPLL	10	1	0.676746	Protein	G4WMG7;A0A0K0L4Y0;A0A0K0L4Y8;L7NSP5;Q96AD5	GLLNPNPLL	143.72	0.442	1.366	TRUE	FALSE	FALSE
A*02:01	GLLPDVPSL	9	8	0.9166	Protein	Q96N66-3;Q96N66-2;B4DDH8;A9C4B8;C9J4E9	GLLPDVPSL	9.35	0.005	0.117	TRUE	FALSE	FALSE
A*02:01	GLLPEHFLFLA	11	1	0.806174	Protein	A0A1W2PNW1;B4DQB3;B7ZAC1;P42226;P42226-2	GLLPELFLA	64.84	0.583	0.791	TRUE	FALSE	FALSE
A*02:01	GLLPEPNILQL	11	2	0.901206	Protein	A0A087WZ13;Q8IY67-2;E9PAU2;Q8IY67	GLLPEILQL	113.55	0.059	1.174	TRUE	FALSE	FALSE
A*02:01	GLLPKLTAL	9	2	0.848123	Protein	Q92845;Q92845-3;Q92845-4;B7Z7E7;Q92845-2	GLLPKLTAL	19.91	0.019	0.288	FALSE	FALSE	FALSE
A*02:01	GLLPQLLR	8	1	0.844072	Protein	X6RLY7;B4DVU4;K7EJY1;K7ER98;Q7Z3S7	GLLPQLLR-	24094.7	13.22	32.093	FALSE	FALSE	FALSE
A*02:01	GLLPSKIRINL	11	3	0.739384	Protein	O75461;Q53F82;Q53FX2;B7Z1I8;F8WEZ5	GLLPSKINL	900.83	0.57	3.844	TRUE	FALSE	FALSE
A*02:01	GLLQINDKIAL	11	4	0.88568	Protein	O43929;Q96B14;O43929-3;C9JGH7;C9J2X8	GLLNDKIAL	452	0.768	2.655	TRUE	FALSE	FALSE
A*02:01	GLLQQPSALML	11	1	0.700703	Protein	C9IY40;C9JZW2;Q5T653;C9JZG7;B4DVE2	GLLPSALML	395.34	0.587	2.461	FALSE	FALSE	FALSE
A*02:01	GLLRDEALAEV	11	2	0.459414	Protein	Q96FC9-4;Q92771;A8MPP1;Q2NKM7;Q96FC9-3	GLLEALAEV	13.53	0.167	0.183	TRUE	FALSE	FALSE
A*02:01	GLLRIIPYL	9	2	0.605161	Protein	Q5T4S7-2;Q5T4S7-3;X6R960;B3KMT2;B4DYV5	GLLRIIPYL	5.51	0.029	0.048	TRUE	FALSE	FALSE
A*02:01	GLLSIFTKV	9	5	0.952108	Protein	B5MC89;Q6YHU6;F5H3M9;Q6YHU6-5;Q6YHU6-3	GLLSIFTKV	8.95	0.027	0.108	TRUE	FALSE	FALSE
A*02:01	GLLTEIRAV	9	1	0.74823	Protein	Q75MK4;Q9UEE5;A0A024RA53	GLLTEIRAV	17.85	0.06	0.258	TRUE	FALSE	FALSE
A*02:01	GLLYPTEDYKV	11	4	0.94426	Protein	A0A0B4J294;Q9UL33-2;Q9UL33;H3BUK6;H3BP13	GLLTEDYKV	323.1	1.035	2.196	TRUE	FALSE	FALSE
A*02:01	GLMDEKLLHNV	11	1	0.761129	Protein	Q9UPN3;H3BQK9;Q9UPN3-5;H3BPE1	GLMDELHNV	8.8	0.027	0.104	FALSE	FALSE	FALSE
A*02:01	GLMDEKLLHNVL	12	1	0.875155	Protein	Q9UPN3;H3BQK9;Q9UPN3-5;H3BPE1	GLMDEKLLL	80.86	0.537	0.931	FALSE	FALSE	FALSE
A*02:01	GLMDNEIKV	9	1	0.906371	Protein	Q6FH58;O14763-2;D3DSR9;Q7Z2I8;B5BU36	GLMDNEIKV	7.94	0.01	0.088	TRUE	FALSE	FALSE
A*02:01	GLMDTVKKV	9	9	0.91265	Protein	Q9Y692;B1AT47;B2RCN8;Q9Y692-2	GLMDTVKKV	17.95	0.016	0.26	TRUE	FALSE	FALSE
A*02:01	GLMEDLLKL	9	4	0.962168	Protein	B3KVE5;Q8WYP5;Q8WYP5-3;Q8WYP5-2	GLMEDLLKL	5.4	0.006	0.044	TRUE	FALSE	FALSE
A*02:01	GLMGAGIAQV	10	3	0.710788	Protein	B4DRH6;E9KL44;A0A140VK76;A0A2R8Y4F5;A0A1W2PP40	GLMGGIAQV	8.21	0.072	0.093	FALSE	FALSE	FALSE
A*02:01	GLMGISSTL	9	3	0.833369	Protein	A0A024RD24;O00221;Q96F31;Q7LC14;Q6ZNS7	GLMGISSTL	14.76	0.082	0.2	TRUE	FALSE	FALSE
A*02:01	GLMHLPPEV	9	1	0.743889	Protein	Q8WYR1;Q8WYR1-2;L7RT34;J3KSW1	GLMHLPPEV	4.8	0.008	0.029	FALSE	FALSE	FALSE
A*02:01	GLMTTVHAI	9	4	0.929114	Protein	Q0QET7;E7EUT5;V9HVZ4;P04406;P04406-2	GLMTTVHAI	8.55	0.089	0.099	TRUE	FALSE	FALSE
A*02:01	GLNDFIQKI	9	2	0.954304	Protein	O00141-5;E9PJN2;O00141-3;B7Z325;O00141-4	GLNDFIQKI	26.13	0.018	0.388	TRUE	FALSE	FALSE
A*02:01	GLNEEIARV	9	3	0.805397	Protein	Q05DQ6;A8K031;O14777	GLNEEIARV	14.14	0.015	0.192	TRUE	FALSE	FALSE
A*02:01	GLNEFVVKF	9	4	0.945391	Protein	A4D1L5;C9JZY6;P62256-2;C9JZG9;P62256	GLNEFVVKF	931.26	0.345	3.91	TRUE	FALSE	FALSE
A*02:01	GLPELVIQL	9	1	0.792038	Protein	G3V198;E9PR16;Q12769	GLPELVIQL	19.24	0.012	0.279	TRUE	FALSE	FALSE
A*02:01	GLQEGDQILKV	11	4	0.734745	Protein	A0A3B3IS03;Q9UDY2-6;Q9UDY2-2;A0A2R8YDH4;A0A3B3IT83	GLQEGILKV	253.99	0.147	1.912	FALSE	FALSE	FALSE
A*02:01	GLQEVQITL	9	1	0.76489	Protein	O14529	GLQEVQITL	19.39	0.02	0.281	FALSE	FALSE	FALSE
A*02:01	GLSDLRLEL	9	8	0.927652	Protein	Q96A65-2;Q6NX51;Q8TAR2;B7Z321;Q96A65	GLSDLRLEL	32.16	0.074	0.466	TRUE	FALSE	FALSE
A*02:01	GLSEPIFQL	9	1	0.895087	Protein	Q6AI38;Q4AEJ3;Q8IWA4;Q4AEJ4	GLSEPIFQL	7.34	0.004	0.078	FALSE	FALSE	FALSE
A*02:01	GLSETILAV	9	5	0.840046	Protein	O75694;A0A024R071;O75694-2;E9PF10;B4DLT2	GLSETILAV	6.92	0.016	0.072	TRUE	FALSE	FALSE
A*02:01	GLSQVAVTV	9	4	0.873748	Protein	E9PD99;Q96II8-4;B4DU23;H7C1G3;Q96II8	GLSQVAVTV	38.89	0.086	0.54	TRUE	FALSE	FALSE
A*02:01	GLSSLLYGS	9	1	0.628378	Non-coding	NR_046298-1	GLSSLLYGS	718.22	5.035	3.406	FALSE	FALSE	FALSE
A*02:01	GLSSLSIHL	9	7	0.945136	Protein	Q96RR4-3;A0A024RBQ0;Q8IZW1;F5H4I7;F5H360	GLSSLSIHL	18.53	0.063	0.269	TRUE	FALSE	FALSE
A*02:01	GLSVIIPHV	9	10	0.963276	Protein	E9PP40;Q15048	GLSVIIPHV	10.87	0.027	0.145	TRUE	FALSE	FALSE
A*02:01	GLTEALHFV	9	4	0.930444	Protein	P07199	GLTEALHFV	3.92	0.015	0.016	TRUE	FALSE	FALSE
A*02:01	GLTEGIWQL	9	5	0.802262	Non-coding	NR_146150-1;NR_146150-4;NR_146149-4;NR_146149-3;NR_146149-1	GLTEGIWQL	5.22	0.006	0.038	FALSE	FALSE	FALSE
A*02:01	GLTSTDLLFHL	11	15	0.966324	Protein	Q14181-2;B3KSX6;H0YDR7;Q14181;A0A3B3ITS5	GLTDLLFHL	42.57	0.48	0.576	TRUE	FALSE	FALSE
A*02:01	GLTYIKIQL	9	1	0.821891	Protein	Q9NR09;Q9H8B7;A0A3B3IUB9	GLTYIKIQL	234.88	0.318	1.833	FALSE	FALSE	FALSE
A*02:01	GLVDKLQAL	9	6	0.889044	Protein	Q6FI81;H3BQ23;H3BUG4;H3BV90;H3BPG7	GLVDKLQAL	22.46	0.024	0.329	TRUE	FALSE	FALSE
A*02:01	GLVDQLVKA	9	2	0.929785	Protein	Q0VGA5;Q5T5C7;P49591;Q53HA4	GLVDQLVKA	35.01	0.051	0.498	FALSE	FALSE	FALSE
A*02:01	GLVGALMHV	9	1	0.621892	Protein	A0A024QYX8;Q2PAL5;P42768	GLVGALMHV	5.73	0.035	0.052	TRUE	FALSE	FALSE
A*02:01	GLVGIGLSRLFSA	13	4	0.700111	Protein	B7Z9R8;P37268;B4DTK0;A0A1W2PQ47;P37268-4	GLLSRLFSA	322.82	6.363	2.195	TRUE	FALSE	FALSE
A*02:01	GLVGSLQEV	9	3	0.931643	Protein	F8WAS1;Q9H1A4	GLVGSLQEV	7.94	0.019	0.088	TRUE	FALSE	FALSE
A*02:01	GLVNYQISV	9	2	0.825063	Protein	B2R6X2;P08236;B4DZD7;P08236-2	GLVNYQISV	7.07	0.032	0.074	TRUE	FALSE	FALSE
A*02:01	GLVPAELVPN	10	1	0.675895	Protein	Q9NUK0-3;Q9NUK0-5;B1AKI5;B1AKI6;Q9NUK0	GLVPELVPN	11118.4	33.875	15.858	FALSE	FALSE	TRUE
A*02:01	GLVPFLVSV	9	3	0.769298	Protein	Q7Z726;A8K7D9;P52292	GLVPFLVSV	4.49	0.008	0.026	TRUE	FALSE	FALSE
A*02:01	GLWEDGRSTLL	11	3	0.694682	Protein	Q96BA8;B2RA75;Q96BA8-2	GLWEDSTLL	37.72	0.094	0.528	TRUE	FALSE	FALSE
A*02:01	GLWGHALLL	9	2	0.76326	Protein	A0A3F2YNX0;O15027;O15027-5;O15027-3;A4QN19	GLWGHALLL	5.8	0.027	0.053	TRUE	FALSE	FALSE
A*02:01	GLWGPEEEPHL	11	11	0.918039	Protein	H0Y412;Q5JSZ5;Q5H9R5	GLWEEEPHL	121.87	0.093	1.227	TRUE	FALSE	FALSE
A*02:01	GLYDSQNPPTV	11	4	0.877801	Protein	Q96RU3-2;B7ZL13;Q96RU3-5;B7ZL14;H0Y7W6	GLYDSPPTV	39.47	0.029	0.546	TRUE	FALSE	FALSE
A*02:01	GLYEFPLNKV	10	12	0.950709	Protein	Q9UJA5-2;Q9UJA5-4;Q9UJA5;Q9UJA5-3	GLYEFPLKV	9.49	0.045	0.12	TRUE	FALSE	FALSE
A*02:01	GLYELVWRV	9	1	0.884331	Protein	B3KWI6;Q96E22	GLYELVWRV	3.1	0.005	0.009	TRUE	FALSE	FALSE
A*02:01	GLYGAIFRL	9	8	0.95435	Protein	K9J962;O95977	GLYGAIFRL	4.84	0.016	0.03	TRUE	FALSE	FALSE
A*02:01	GLYPNLIQV	9	7	0.883178	Protein	Q7L2E3;H7BXY3;Q7L2E3-2;A0A024R2T6;Q7L2E3-3	GLYPNLIQV	4.85	0.003	0.03	TRUE	FALSE	FALSE
A*02:01	GLYSGVTTV	9	6	0.867534	Protein	B4DNN4;Q53GZ5;B4DS95;P23921	GLYSGVTTV	6.61	0.008	0.066	TRUE	FALSE	FALSE
A*02:01	GMAERIPEL	9	13	0.958769	Protein	B3KN05;O95573;B3KMA6;A0A024R497;B2RBE0	GMAERIPEL	7.19	0.009	0.075	TRUE	FALSE	FALSE
A*02:01	GMASLNLPAV	10	6	0.925909	Protein	P35221;P35221-3;B3KSR8;A0A384MDY0;P35221-2	GMASNLPAV	10.91	0.775	0.146	TRUE	FALSE	TRUE
A*02:01	GMFKNLLKEV	10	4	0.945883	Protein	B4DHJ3;C9J2Y9;P30876;C9J4M6;B4DH29	GMFKNLLEV	21.41	0.779	0.311	TRUE	FALSE	TRUE
A*02:01	GMLDGLVNV	9	3	0.947619	Protein	Q8IXB1;Q6YPB0;B3KNK5;H7C1G0;Q8IXB1-3	GMLDGLVNV	2.68	0.004	0.008	TRUE	FALSE	FALSE
A*02:01	GMLEKIDMI	9	2	0.920451	Protein	B4DRP9;Q69YJ7;Q9NTZ6;B3KQH4	GMLEKIDMI	18.45	0.123	0.267	TRUE	FALSE	FALSE
A*02:01	GMMSVDPRL	9	1	0.654605	Protein	H0YM87;O95072-2;O95072	GMMSVDPRL	12.84	0.076	0.173	TRUE	FALSE	FALSE
A*02:01	GMWNPNAPVFL	11	1	0.488837	Protein	Q5R372-3;Q5R372-4;Q5R372;Q5R372-2;A0A0U1RRM5	GMWNPPVFL	30.72	0.374	0.449	FALSE	FALSE	FALSE
A*02:01	GMYGKIAVMEL	11	4	0.894734	Protein	B4DSA8;F5GY55;Q16531;Q16531-2;F5H198	GMYGKIMEL	42.87	0.443	0.579	TRUE	FALSE	FALSE
A*02:01	GMYIFLHTV	9	9	0.935326	Protein	Q8N138;A0A024R1W6;J3KTF9;Q8N138-4;J3QRM9	GMYIFLHTV	7.93	0.114	0.088	TRUE	FALSE	FALSE
A*02:01	GMYSAEELKKLSV	13	4	0.907554	Protein	O95602;B7ZKR9;B9ZVN9	GMYSAELSV	174.8	3.775	1.541	TRUE	FALSE	FALSE
A*02:01	GQFPSYLETV	10	1	0.762726	Protein	Q86Y56;Q86Y56-3;Q86Y56-2;A0A024R803;B3KNN3	GQFPYLETV	99.85	0.744	1.084	FALSE	FALSE	FALSE
A*02:01	GQIEVVPEV	9	5	0.861911	Protein	Q92576-2;A8K376;Q92576;E9PE34;B3KP41	GQIEVVPEV	5.36	0.009	0.042	TRUE	FALSE	FALSE
A*02:01	GQSELASRLTL	11	7	0.934121	Protein	A0A024R5Y1;H3BRR0;Q9NZD8-2;Q9NZD8	GQSELALTL	4154.57	2.799	8.62	TRUE	FALSE	FALSE
A*02:01	GTGGKFDIIQLV	12	1	0.535661	Non-coding	NR_033951-6;NR_033951-1;NR_033951-5;NR_033951-7;NR_033951-4	GTFDIIQLV	2511.1	4.334	6.53	FALSE	FALSE	FALSE
A*02:01	GTIGLIHAV	9	5	0.603304	Protein	A6NLJ7;D6R974;D6RE83;D6R956;B2RD14	GTIGLIHAV	30.33	0.163	0.444	TRUE	FALSE	FALSE
A*02:01	GTLPSTLYL	9	2	0.791681	Protein	A6NNT0	GTLPSTLYL	306.94	0.574	2.129	FALSE	FALSE	FALSE
A*02:01	GTPTIGLVLLV	11	2	0.681977	Non-coding	NR_028509-1;NR_028508-1	GTIGLVLLV	4553.94	7.313	9.069	FALSE	FALSE	TRUE
A*02:01	GVAESIHLWEV	11	5	0.892298	Protein	K7EKX5;A0A0A0MQU0;K7EIR0;Q9BV38;A0A087X237	GVAESIWEV	40.31	0.335	0.554	TRUE	FALSE	FALSE
A*02:01	GVIDGHIYAV	10	6	0.778942	Protein	K7EQX2;Q14145;K7EPZ3;A0A2P1M8C0;A0A024R7C0	GVIDGIYAV	23.4	0.224	0.345	TRUE	FALSE	FALSE
A*02:01	GVLPNIQAV	9	6	0.930459	Protein	Q9BTM1;P0C0S8;A4FTV9;A0A0U1RRH7;Q96KK5	GVLPNIQAV	68.34	0.07	0.821	TRUE	FALSE	FALSE
A*02:01	HCKTLHIVLF	10	1	0.645881	Protein	Q6ZT12-4;Q6ZT12;H7C481	HCKTHIVLF	35349	49.25	56.879	FALSE	FALSE	TRUE
A*02:01	HEQLSVAEITN	11	2	0.754045	Protein	A8JZY9;Q9UQM3;P68363;P68366;Q71U36	HLSVAEITN	38065.2	78.333	65.54	TRUE	FALSE	TRUE
A*02:01	HIIENIVAV	9	11	0.938568	Protein	J3QSV6;A0PJ61;I3L3U9;Q32Q62;A0PJ87	HIIENIVAV	9.63	0.022	0.123	TRUE	FALSE	FALSE
A*02:01	HILDFSPSL	9	2	0.89648	Protein	F8W6A4;Q8IVW5;B4DYA4;Q96GH7;Q8N7S8	HILDFSPSL	40.38	0.061	0.555	TRUE	FALSE	FALSE
A*02:01	HILEEKGLVKV	11	2	0.817604	Protein	Q8TAR8;Q9Y2L9-2;A8KA33	HILEGLVKV	489.05	0.438	2.772	FALSE	FALSE	FALSE
A*02:01	HILQLLTTV	9	3	0.79297	Protein	H0YCN7;B3KVU5;H0YEK5;J3KND1;E9PRZ1	HILQLLTTV	62.01	0.174	0.768	TRUE	FALSE	FALSE
A*02:01	HLAAIVILL	9	1	0.890334	Protein	A0A024QZT7;P33947;P33947-2;H7BYF7	HLAAIVILL	16.15	0.076	0.228	FALSE	FALSE	FALSE
A*02:01	HLADFTPRL	9	2	0.766739	Protein	O75165	HLADFTPRL	9.99	0.009	0.13	FALSE	FALSE	FALSE
A*02:01	HLAELIAEL	9	38	0.953183	Protein	Q96F44-3;R4GMV1;Q96F44-2;Q96F44	HLAELIAEL	7.35	0.01	0.078	TRUE	FALSE	FALSE
A*02:01	HLAIKLEQV	9	15	0.964363	Protein	Q9Y4B6;Q9Y4B6-2	HLAIKLEQV	63.81	0.081	0.783	TRUE	FALSE	FALSE
A*02:01	HLANIVERV	9	6	0.852159	Protein	C9JWC5;C9J060;D3DQT1;Q8IYM9;A0A348GSH8	HLANIVERV	18.6	0.029	0.269	TRUE	FALSE	FALSE
A*02:01	HLDATKLLL	9	5	0.917277	Non-coding	NR_164823-1;NR_164823-10;NR_164824-4;NR_164824-7;NR_164823-7	HLDATKLLL	225.26	0.262	1.791	TRUE	FALSE	FALSE
A*02:01	HLDEVFLEL	9	2	0.799011	Protein	A0A024RA60;B3KUH1;Q9GZY4	HLDEVFLEL	10.08	0.007	0.131	FALSE	FALSE	FALSE
A*02:01	HLFDAFVSV	9	13	0.83203	Protein	Q8WUY9-2;A0A2X0SFC1;Q8WUY9;B4DRG1	HLFDAFVSV	3.67	0.006	0.013	TRUE	FALSE	FALSE
A*02:01	HLFEDAYLLTL	11	1	0.807292	Protein	P49450;P49450-2	HLFEDLLTL	21.67	0.079	0.315	TRUE	FALSE	FALSE
A*02:01	HLFETISQA	9	2	0.812868	Protein	P49720;A0A384NL22	HLFETISQA	33.8	0.056	0.485	TRUE	FALSE	FALSE
A*02:01	HLFGALVLL	9	1	0.808751	Protein	Q9BWH6-2;Q9BWH6-3;Q9BWH6	HLFGALVLL	9.46	0.049	0.119	TRUE	FALSE	FALSE
A*02:01	HLFTATINL	9	11	0.90417	Protein	A0A1B0GTW1;A0A3B3ISZ5;Q9UDY2-4;Q9UDY2-6;Q9UDY2	HLFTATINL	23.81	0.097	0.352	TRUE	FALSE	FALSE
A*02:01	HLGDFLVFL	9	3	0.897279	Protein	Q15751;A0A024R5W0	HLGDFLVFL	7.96	0.031	0.089	TRUE	FALSE	FALSE
A*02:01	HLIDTNKIQL	10	3	0.888343	Protein	Q96BY6;A0A2R8YD85;Q96BY6-3	HLIDTNIQL	158.52	0.194	1.453	TRUE	FALSE	FALSE
A*02:01	HLIEEQNVISV	11	1	0.726559	Protein	Q8IWV7;B4DYL2;A8K901;A0A087WTJ9;Q8IWV7-2	HLIEEVISV	41.42	0.074	0.565	FALSE	FALSE	FALSE
A*02:01	HLIEPLANA	9	12	0.899143	Protein	Q9Y490;A0A1S5UZ07	HLIEPLANA	22.2	0.058	0.325	TRUE	FALSE	FALSE
A*02:01	HLIHEVTKV	9	4	0.907176	Protein	B4DJ30;Q14697;V9HWJ0;Q14697-2	HLIHEVTKV	27.54	0.02	0.408	TRUE	FALSE	FALSE
A*02:01	HLINYIIFL	9	8	0.917656	Protein	Q5BJD5;B4E0E0	HLINYIIFL	4.63	0.03	0.028	TRUE	FALSE	FALSE
A*02:01	HLISTINTV	9	6	0.940342	Non-coding	NR_136309-1;NR_136309-2	HLISTINTV	19.19	0.038	0.278	TRUE	FALSE	FALSE
A*02:01	HLLDFPNIVI	10	4	0.911316	Protein	Q6JH03;Q6JH02;B4DK16;Q6P2Q9	HLLDFPIVI	48.25	0.538	0.636	TRUE	FALSE	FALSE
A*02:01	HLLDIYIQL	9	11	0.894698	Protein	Q6ZVV6;Q5T795;Q9NU22	HLLDIYIQL	7.75	0.007	0.085	TRUE	FALSE	FALSE
A*02:01	HLLEEPIYL	9	14	0.94171	Protein	B4DL42;Q9BUB4;B2RBG6;Q9BUB4-2	HLLEEPIYL	7.5	0.004	0.08	TRUE	FALSE	FALSE
A*02:01	HLLEHSVEL	9	1	0.686515	Protein	Q5VW36	HLLEHSVEL	7.01	0.005	0.073	TRUE	FALSE	FALSE
A*02:01	HLLGDQISL	9	2	0.855075	Protein	Q9NQQ7;Q9NQQ7-2;B7Z6R4;Q9NQQ7-3;B7Z6F2	HLLGDQISL	40.8	0.053	0.559	TRUE	FALSE	FALSE
A*02:01	HLLGDVVFL	9	3	0.799219	Protein	Q8IW90;B4E0C5;H7C196;H0Y8C3;Q9NZJ7	HLLGDVVFL	7.35	0.026	0.078	TRUE	FALSE	FALSE
A*02:01	HLLHTVPAL	9	3	0.813209	Protein	Q9Y4B6-3;B3KN11;Q9Y4B6-2;Q9Y4B6	HLLHTVPAL	19.89	0.051	0.288	TRUE	FALSE	FALSE
A*02:01	HLLNESPML	9	2	0.938285	Protein	Q92621	HLLNESPML	36.58	0.071	0.516	TRUE	FALSE	FALSE
A*02:01	HLLPGDELYL	10	2	0.671648	Protein	A8MXV4	HLLPGELYL	46.65	0.173	0.617	TRUE	FALSE	FALSE
A*02:01	HLLPTAPTTV	10	10	0.813284	Protein	Q6VMQ6-2;Q6VMQ6-4;A0A024RAY1;B3KQF8;B3KNI7	HLLPAPTTV	100.12	0.153	1.086	TRUE	FALSE	FALSE
A*02:01	HLLSDELLL	9	5	0.792867	Protein	Q9UKT7;C9J0Y7	HLLSDELLL	31.14	0.108	0.454	FALSE	FALSE	FALSE
A*02:01	HLLSELEAAPYL	12	7	0.879513	Protein	Q8WUA4-2;Q8WUA4;Q53QN0;A0A087WZD8	HLLSELPYL	46.78	0.891	0.619	TRUE	FALSE	FALSE
A*02:01	HLLSGQLPTI	10	7	0.893222	Protein	Q96NM4-3;Q96NM4-2;Q96NM4-4;Q96NM4;H6UKR8	HLLSGLPTI	39.39	0.355	0.545	TRUE	FALSE	FALSE
A*02:01	HLLSKLISV	9	1	0.789827	Protein	H0Y9X0;Q6ZR29;A0A286YEZ9;B3KXG5;O94915	HLLSKLISV	5.25	0.005	0.039	FALSE	FALSE	FALSE
A*02:01	HLMEIQVNGGTV	12	1	0.787803	Protein	B3KS36;Q9NY85;H7C3M2;P39023;B5MCW2	HLMEIQVTV	30.42	0.558	0.445	TRUE	FALSE	FALSE
A*02:01	HLPETKFSEL	10	4	0.650618	Protein	A0A0J9YWL0;Q9Y4K1	HLPETKFSL	856.42	1.162	3.743	TRUE	FALSE	FALSE
A*02:01	HLSDAIVEV	9	11	0.741341	Protein	Q8NBF6-2;Q8NBF6;A0A024RA79;H7C0I1;B8ZZW5	HLSDAIVEV	6.39	0.006	0.061	TRUE	FALSE	FALSE
A*02:01	HLSDLALTL	9	1	0.873332	Protein	B4E349;Q86U44;F5H6D8;H0YFV6;B4E2F6	HLSDLALTL	23.87	0.045	0.353	FALSE	FALSE	FALSE
A*02:01	HLSIINEYL	9	11	0.90417	Protein	H0YLE8;A4QPB0;A0A024RC65;B4E2M0;P46940	HLSIINEYL	35.65	0.274	0.505	TRUE	FALSE	FALSE
A*02:01	HLSNIPPSV	9	11	0.795144	Protein	B4DSS8;B4DSI2;P26599;B4DSU5;O95758-7	HLSNIPPSV	24.41	0.018	0.361	TRUE	FALSE	FALSE
A*02:01	HLSVVSVTV	9	8	0.916905	Protein	D6RCC7;D6RC17;Q9P2D6-4;Q9P2D6-2;Q9P2D6-3	HLSVVSVTV	43.67	0.198	0.586	TRUE	FALSE	FALSE
A*02:01	HLTDITLKV	9	21	0.96661	Protein	H3BVA8;Q15046-2;Q15046	HLTDITLKV	20.89	0.019	0.301	TRUE	FALSE	FALSE
A*02:01	HLTYLNVYL	9	7	0.887597	Protein	Q92620;A8K6G9;B4DM30;B4DET0;Q92620-2	HLTYLNVYL	19.68	0.296	0.285	TRUE	FALSE	FALSE
A*02:01	HLVPEVPTV	9	13	0.896151	Protein	O15156;A8K6F4;O15156-2	HLVPEVPTV	11.11	0.004	0.149	TRUE	FALSE	FALSE
A*02:01	HLWAELVFL	9	7	0.867691	Protein	Q00610;J3KS13;P53675;Q00610-2;A0A087WXH4	HLWAELVFL	6.18	0.044	0.058	TRUE	FALSE	FALSE
A*02:01	HLWEVDVQGSKA	12	8	0.893648	Protein	A0A0S2Z316;A0A0S2Z3B0;P04424;B4DU69;Q6XYD2	HLWEVDVQA	668.3	1.429	3.279	TRUE	FALSE	FALSE
A*02:01	HLWNSIHGL	9	1	0.781709	Protein	Q14596;A0A024R1Y3;Q3LRJ5;Q14596-2;Q3LRJ8	HLWNSIHGL	8.96	0.028	0.108	TRUE	FALSE	FALSE
A*02:01	HLWRGIVSI	9	3	0.714654	Protein	Q6DN14-3;Q6DN14-2;D6RA42;Q6DN14;H0YA70	HLWRGIVSI	10.47	0.041	0.138	TRUE	FALSE	FALSE
A*02:01	HLWSYLITL	9	1	0.861272	Protein	Q9UNY4-2	HLWSYLITL	5.4	0.026	0.043	TRUE	FALSE	FALSE
A*02:01	HLYDIHVTV	9	4	0.858377	Protein	A8MXV4	HLYDIHVTV	5.36	0.005	0.042	TRUE	FALSE	FALSE
A*02:01	HLYSSIEHLTT	11	5	0.760953	Protein	Q7Z6Z7;A0A024R9W5;A0A024R9Y3;Q9NXW1;Q7Z6Z7-3	HLYSSILTT	1482.17	2.041	4.956	TRUE	FALSE	FALSE
A*02:01	HPSPATALSV	10	1	0.695248	Non-coding	NR_121582-1;NR_121582-2	HPSPATLSV	14582.8	14.397	19.581	FALSE	FALSE	TRUE
A*02:01	HTQPLGVYL	9	1	0.68103	Protein	P01880;P01880-2;A0A0A0MS09;P0DOX3;Q8NF20	HTQPLGVYL	4379.97	1.975	8.878	FALSE	FALSE	FALSE
A*02:01	HVLDTLIQL	9	1	0.595351	Protein	A0A024R9W5;Q5H935;A0A024R9U8;H0Y659;Q7Z6Z7	HVLDTLIQL	109.93	0.078	1.151	FALSE	FALSE	FALSE
A*02:01	HVLDVIHEV	9	5	0.811983	Protein	O75962-5;O75962-4;E7EPJ7;O75962-2;O75962	HVLDVIHEV	9.06	0.004	0.11	TRUE	FALSE	FALSE
A*02:01	HWRMKQLVGL	10	1	0.234961	Non-coding	NR_036464-3	HWMKQLVGL	17197.1	21.132	22.555	FALSE	FALSE	TRUE
A*02:01	IAPPVPLKA	9	7	0.863536	Protein	B4DYG2;A0JLU2;O43683-2;A8K5A6;O43683	IAPPVPLKA	9311.76	1.48	14.026	TRUE	FALSE	TRUE
A*02:01	IAPTGHSL	8	1	0.629869	Protein	B4DZW0;Q14141-3;Q9NVA2-2;Q9NVA2;Q541S4	IA-PTGHSL	27599	11.748	38.11	FALSE	FALSE	FALSE
A*02:01	IIFDYISVSA	10	2	0.570389	Non-coding	NR_148707-1;NR_148711-2;NR_148711-6;NR_148712-3;NR_148712-15	IIFDYIVSA	87	1.017	0.986	FALSE	FALSE	TRUE
A*02:01	IIFLSDQTKEKE	12	2	0.952438	Protein	Q04837;A4D1U3;Q75MV9;Q567R6	IIFLSDQTE	33288.8	57.727	51.094	FALSE	FALSE	FALSE
A*02:01	IIFVPVPQL	9	5	0.952027	Protein	B5MCP9;P62081	IIFVPVPQL	397.09	0.242	2.467	TRUE	FALSE	FALSE
A*02:01	IIIDSVPEV	9	5	0.880543	Protein	H0Y6F5;Q9H4I2;A8K8Q0;Q9H4I2-2	IIIDSVPEV	5.14	0.004	0.036	TRUE	FALSE	FALSE
A*02:01	IIIPEIQKV	9	2	0.921019	Protein	P55060;B4DPS6;B4DM31;A0A384NKW7;B4DS32	IIIPEIQKV	39.35	0.012	0.545	TRUE	FALSE	FALSE
A*02:01	IILEEGKEILV	11	11	0.959002	Protein	G3V1A4;E9PP50;E9PS23;E9PQB7;V9HWI5	IILEEEILV	709.28	1.134	3.384	TRUE	FALSE	FALSE
A*02:01	IINTFHQY	8	3	0.912346	Protein	B2R4M6;P06702	IIN-TFHQY	31170.1	19.447	45.702	FALSE	FALSE	FALSE
A*02:01	IKDGIVPSL	9	1	0.763802	Protein	B0I1T3;Q13402-5;H7C4D8;Q13402-6;Q13402-8	IKDGIVPSL	11405.4	2.468	16.158	FALSE	FALSE	FALSE
A*02:01	ILAAHVPTL	9	10	0.922508	Protein	P30049;A0A087WTL3	ILAAHVPTL	6.8	0.008	0.07	FALSE	FALSE	FALSE
A*02:01	ILAAIVNHL	9	1	0.847828	Protein	Q6PHZ7;P49116-2;P49116;H7C3R1;H7C3L1	ILAAIVNHL	12.3	0.044	0.166	FALSE	FALSE	FALSE
A*02:01	ILAAVETRL	9	4	0.753492	Protein	A0A024R3Q6;Q9NVF7;Q9NVF7-2	ILAAVETRL	45.91	0.131	0.608	TRUE	FALSE	FALSE
A*02:01	ILAELLLRV	9	14	0.92434	Protein	A0A0S2Z3F9;P50613;D6R9G1;D6REC6;D6RAD4	ILAELLLRV	4.31	0.006	0.023	TRUE	FALSE	FALSE
A*02:01	ILAPAGSLPKI	11	2	0.816411	Protein	Q9Y5Z9	ILAPSLPKI	245.35	0.625	1.877	TRUE	FALSE	FALSE
A*02:01	ILAQIMPFL	9	1	0.793891	Protein	H0YKN8;Q04726-5;H0YLI3;Q6PRX2;Q04726-4	ILAQIMPFL	6.9	0.055	0.071	TRUE	FALSE	FALSE
A*02:01	ILAQQPLSV	9	2	0.872025	Protein	Q6ZRI6-2;Q9NPN3;H3BMJ2;B4E3C6;Q2VPA3	ILAQQPLSV	22.17	0.02	0.324	TRUE	FALSE	FALSE
A*02:01	ILASIFETV	9	4	0.855344	Protein	A7LNJ1;Q8WUM9	ILASIFETV	5.72	0.03	0.052	TRUE	FALSE	FALSE
A*02:01	ILDDIGHGV	9	4	0.890094	Protein	B7Z836;F8WAL6;E9PEZ7;A0A0C4DG21;Q9NYB9	ILDDIGHGV	6.1	0.006	0.057	TRUE	FALSE	FALSE
A*02:01	ILDDTAKNLRV	11	4	0.711663	Protein	Q5JRA6-4;Q5JRA6-2;A0A0A0MRH6;Q5JRA6	ILDDTNLRV	305.87	0.325	2.125	TRUE	FALSE	FALSE
A*02:01	ILDEMSHKLRL	11	4	0.896622	Protein	Q5TBH8;Q53H08;Q5TBH6;O15228-2;O15228	ILDEMSHKL	126.91	0.236	1.259	TRUE	FALSE	FALSE
A*02:01	ILDEPTNNL	9	1	0.87037	Protein	Q2L6I2;A0A1U9X609;Q8NE71;A0A0G2JIC2;Q8NE71-2	ILDEPTNNL	11.06	0.004	0.148	TRUE	FALSE	FALSE
A*02:01	ILDEVIFKL	9	12	0.967723	Protein	C9J6Z7;Q15051;Q15051-3;C9JXD7	ILDEVIFKL	3.89	0.001	0.016	TRUE	FALSE	FALSE
A*02:01	ILDGNQLHI	9	1	0.883738	Protein	O75534-2;O75534-3;O75534;A0A024R0E2;A0A024R0K2	ILDGNQLHI	75.92	0.083	0.886	TRUE	FALSE	FALSE
A*02:01	ILDHEVPSL	9	1	0.605147	Protein	Q6NZ36-2;Q6NZ36-5;H7C361;Q6NZ36-4;A0A024R0B3	ILDHEVPSL	15.73	0.007	0.22	TRUE	FALSE	FALSE
A*02:01	ILDKKVEKV	9	8	0.926714	Protein	Q58FF7;Q9H6X9;A8K3W9;P08238;A0A024RD80	ILDKKVEKV	62.73	0.02	0.774	TRUE	FALSE	FALSE
A*02:01	ILDQKINEV	9	3	0.855621	Protein	C9JG30;P11926	ILDQKINEV	12.8	0.004	0.173	TRUE	FALSE	FALSE
A*02:01	ILDSRLIAA	9	4	0.682094	Protein	B3KT27;O95503;B0QXZ6	ILDSRLIAA	65.48	0.207	0.796	TRUE	FALSE	FALSE
A*02:01	ILEEGKEILV	10	10	0.959854	Protein	G3V1A4;E9PP50;E9PS23;E9PQB7;V9HWI5	ILEEGEILV	322.49	0.754	2.194	TRUE	FALSE	FALSE
A*02:01	ILENPPEEMKL	11	6	0.963587	Protein	O43432-2;A0A0A0MSA7;O43432-3;B4DXR2;A0A0U1RQK7	ILPPEEMKL	4545.28	1.15	9.059	TRUE	FALSE	FALSE
A*02:01	ILFGHENRV	9	7	0.79069	Protein	B3KWS4;O14775-2;A8K2R5;A0A024R5V3;O14775	ILFGHENRV	11.45	0.036	0.154	TRUE	FALSE	FALSE
A*02:01	ILFGLIKDV	9	3	0.785293	Protein	Q5SQH4;A0A140T947;B4DZ28;O60231;A0A140T8Y5	ILFGLIKDV	28.16	0.214	0.416	FALSE	FALSE	FALSE
A*02:01	ILFNRVLGV	9	1	0.778744	Protein	B4DZI4;P47712;A8K2S1	ILFNRVLGV	4	0.024	0.017	TRUE	FALSE	FALSE
A*02:01	ILFPLRFTL	9	1	0.584086	Protein	O43156;Q3B768	ILFPLRFTL	7.84	0.055	0.087	TRUE	FALSE	FALSE
A*02:01	ILFSEDSTKLFV	12	7	0.925535	Protein	H3BRM8;Q969X6;Q969X6-3;A0A0J9YWM9;H3BSH7	ILFSEDLFV	20.69	1.042	0.298	TRUE	FALSE	FALSE
A*02:01	ILGDFLVAV	9	1	0.687995	Protein	Q2M2R1;A8KAQ7;Q4KMX6;Q9UJX3-2;A5D8X2	ILGDFLVAV	4	0.016	0.017	TRUE	FALSE	FALSE
A*02:01	ILGIQPPSV	9	12	0.937344	Protein	Q9UPN6;B7Z876;Q9UPN6-2;B7Z3A4;A0A0A0MT33	ILGIQPPSV	45.59	0.062	0.604	TRUE	FALSE	FALSE
A*02:01	ILGPPPPSFHL	11	1	0.445404	Protein	D6R991;P43243;B3KM87;D6RE02;D6RBI2	ILGPPPPSL	485.39	0.331	2.761	TRUE	FALSE	FALSE
A*02:01	ILGPTFTL	8	6	0.929852	Protein	A0A024RAP2;P04035-3;B2R649;P04035;A8KA27	IL-GPTFTL	329.23	0.818	2.221	TRUE	FALSE	FALSE
A*02:01	ILGTHNITV	9	1	0.740378	Protein	Q9NVH2-3;A0A087WXK3;Q9NVH2-2;Q9NVH2-4;Q9NVH2	ILGTHNITV	21.49	0.077	0.312	TRUE	FALSE	FALSE
A*02:01	ILHDDEVTV	9	6	0.722146	Protein	P05386-2;Q6FG99;H0YL57;A0A024R608;P05386	ILHDDEVTV	14.27	0.018	0.194	TRUE	FALSE	FALSE
A*02:01	ILHHVNIGL	9	1	0.713243	Protein	Q8N3C0	ILHHVNIGL	28.79	0.168	0.425	FALSE	FALSE	FALSE
A*02:01	ILHSVTTNL	9	2	0.758764	Protein	A8K1Z3;Q8NHV4-3;G3V2V3;G3V4L2;Q8NHV4	ILHSVTTNL	57.13	0.106	0.727	TRUE	FALSE	FALSE
A*02:01	ILHTLLTLV	9	2	0.682974	Protein	P21359;B4DXH1;P21359-2;P21359-6;J3QSG6	ILHTLLTLV	12.82	0.126	0.173	FALSE	FALSE	FALSE
A*02:01	ILIEKEYLERV	11	6	0.947944	Protein	A0A090N7U0;B4DLA3;Q75MQ1;B3KU45;Q13616	ILIEKLERV	44.73	0.384	0.596	TRUE	FALSE	FALSE
A*02:01	ILIETKLVL	9	2	0.803584	Protein	Q14643;A0A3B3ITM6;A0A3B3IU04;Q14643-5;B4DER3	ILIETKLVL	74.41	0.13	0.874	FALSE	FALSE	FALSE
A*02:01	ILIRPLVSV	9	8	0.951969	Protein	A0A0S2Z2W5;B4DGL8;A0A2R8Y473;A0A0S2Z367;Q7Z3K5	ILIRPLVSV	8.52	0.023	0.098	FALSE	FALSE	FALSE
A*02:01	ILISVDGKVYL	11	6	0.892546	Protein	A0A1W2PNV1;A0A1W2PPM8;A0A1W2PR00;A0A1W2PPG2;Q7RTN6-4	ILIDGKVYL	48.95	0.112	0.644	TRUE	FALSE	FALSE
A*02:01	ILLAEVDKV	9	4	0.94975	Protein	A0A024R6B2;Q9UNK9	ILLAEVDKV	16.04	0.06	0.226	TRUE	FALSE	FALSE
A*02:01	ILLAEVPTM	9	5	0.883198	Protein	H0Y723;E7EQB9;O15160-2;A0A2R8Y5D3;B4DEC2	ILLAEVPTM	23.14	0.068	0.341	TRUE	FALSE	FALSE
A*02:01	ILLDDHGHIRI	11	6	0.874717	Protein	P43250-2;P43250-3;Q96AD6;F8W9W2;B3KPS5	ILLDGHIRI	263.11	0.539	1.946	TRUE	FALSE	FALSE
A*02:01	ILLDDNMQIRL	11	8	0.862456	Protein	H3BP07;A0A024QZE8;H3BTW6;J3KNN3;P15735	ILLDDNMQL	47.21	0.067	0.624	FALSE	FALSE	FALSE
A*02:01	ILLDDQFQPKL	11	6	0.934078	Protein	Q9Y616;B2RA52;Q9Y616-2	ILLDDQFQL	48.66	0.076	0.641	TRUE	FALSE	FALSE
A*02:01	ILLDERGQIKL	11	3	0.833862	Protein	O14733-4;O14733;D6W660;O14733-2;O14733-3	ILLDGQIKL	145.46	0.073	1.377	TRUE	FALSE	FALSE
A*02:01	ILLDGDKGKFLL	12	2	0.731382	Protein	Q96IR7	ILLDGDFLL	18.02	0.418	0.261	TRUE	FALSE	FALSE
A*02:01	ILLDHEKEWKL	11	3	0.881632	Protein	P54136-2;P54136	ILLDHEWKL	119.16	0.296	1.209	FALSE	FALSE	FALSE
A*02:01	ILLDIEGHFISL	12	1	0.918667	Non-coding	NR_120457-1	ILLDIEISL	43.32	0.519	0.583	FALSE	FALSE	FALSE
A*02:01	ILLDIHIFM	9	1	0.924684	Protein	Q14008;Q14008-2;Q14008-3;Q8IYN5	ILLDIHIFM	8.21	0.074	0.093	TRUE	FALSE	FALSE
A*02:01	ILLDKLLIRL	10	3	0.83241	Protein	O14646;O14646-2	ILLDKLIRL	17.21	0.121	0.248	TRUE	FALSE	FALSE
A*02:01	ILLDNDHYAM	10	2	0.594923	Protein	B3KNH8;B4DGU5;Q86WA8-2;H3BQ67;B3KXC7	ILLDNDHYM	70.58	0.58	0.841	FALSE	FALSE	FALSE
A*02:01	ILLDQTVRV	9	2	0.833041	Protein	Q69YN4-2;Q69YN4-4;Q69YN4;Q69YN4-3	ILLDQTVRV	4.94	0.003	0.032	TRUE	FALSE	FALSE
A*02:01	ILLDVKTRL	9	1	0.665995	Protein	P02533;F5GWP8;P08779;A0A024R1X6;Q04695	ILLDVKTRL	33.18	0.029	0.478	FALSE	FALSE	FALSE
A*02:01	ILLEEVSPEL	10	1	0.614172	Protein	B4DRB7;B4DEK5;Q53FJ5;P07602;C9JIZ6	ILLEEVPEL	15.1	0.071	0.207	FALSE	FALSE	FALSE
A*02:01	ILLEGTMNL	9	3	0.908827	Protein	B9TX72;O75448;B4DSQ6;B9TX63;F5GY88	ILLEGTMNL	4.76	0.008	0.029	TRUE	FALSE	FALSE
A*02:01	ILLEHNYAL	9	3	0.84186	Protein	O15047	ILLEHNYAL	3.39	0.008	0.01	TRUE	FALSE	FALSE
A*02:01	ILLKDILSV	9	4	0.780867	Protein	Q13315;A0A024R3C7;Q59GH6;A0A087X0E9;E9PIN0	ILLKDILSV	4.51	0.008	0.026	TRUE	FALSE	FALSE
A*02:01	ILLNIEHRIML	11	1	0.470593	Protein	B3KX59;B1AKP8;P42345;Q96QW8	ILLNIEHRL	148.48	0.704	1.396	TRUE	FALSE	FALSE
A*02:01	ILLNNSGQIKL	11	3	0.956237	Protein	Q9NYV4-3;Q9NYV4;Q9NYV4-2;J3QSD7	ILLSGQIKL	347.69	0.335	2.293	TRUE	FALSE	FALSE
A*02:01	ILLNPAYDVYL	11	4	0.81271	Protein	Q8TEM1;Q8TEM1-2	ILLNPDVYL	24.71	0.437	0.366	TRUE	FALSE	FALSE
A*02:01	ILLPEPSIRSV	11	1	0.712872	Protein	A0A0S2Z3I6;E9PRV7;P25098;A0A0S2Z392	ILLPEPSSV	124.64	0.126	1.245	TRUE	FALSE	FALSE
A*02:01	ILLPYVSKV	9	4	0.947418	Protein	Q9BSA9;Q9BSA9-2;E7ETE6;D3DVN5;D6RBE5	ILLPYVSKV	4.24	0.004	0.021	TRUE	FALSE	FALSE
A*02:01	ILLQENGHIYV	11	1	0.708095	Protein	Q9UBK8-1;Q9UBK8	ILLQENIYV	29.48	0.405	0.433	TRUE	FALSE	FALSE
A*02:01	ILLSEEDLQML	11	1	0.864789	Protein	O00273;Q53HN4;O00273-2;A0A024R4H5	ILLEDLQML	96.62	0.194	1.06	TRUE	FALSE	FALSE
A*02:01	ILLSEPGLVKL	11	9	0.956247	Protein	Q6PIN8;Q86V37;Q9UL54-4;Q9UL54;A0PJ48	ILLPGLVKL	89.67	0.111	1.008	TRUE	FALSE	FALSE
A*02:01	ILLSVPLLV	9	2	0.907371	Protein	P53621;P53621-2;A0A3B3IT15;A0A3B3IS84;A0A3B3ITI7	ILLSVPLLV	4.84	0.034	0.03	TRUE	FALSE	FALSE
A*02:01	ILLSVPLLVV	10	1	0.774422	Protein	P53621;P53621-2;A0A3B3IT15;A0A3B3IS84;A0A3B3ITI7	ILLSVPLLV	11.85	0.542	0.16	FALSE	FALSE	FALSE
A*02:01	ILLTEPGQVKL	11	6	0.929304	Protein	Q9H2K8;A8K0J3;H0YF68;Q7L7X3;A0A024QZ70	ILLPGQVKL	447.36	0.185	2.639	TRUE	FALSE	FALSE
A*02:01	ILMEHIHKL	9	45	0.963242	Protein	J3KTE4;J3QR09;Q8IWR8;Q53G49;P84098	ILMEHIHKL	2.77	0.001	0.008	TRUE	FALSE	FALSE
A*02:01	ILMEHIHKLKA	11	3	0.715962	Protein	J3KTE4;J3QR09;Q8IWR8;Q53G49;P84098	ILMEHIHKA	54.73	0.255	0.706	TRUE	FALSE	FALSE
A*02:01	ILMGVLKEV	9	8	0.964363	Protein	O43143;B4E0S6	ILMGVLKEV	4.12	0.016	0.019	TRUE	FALSE	FALSE
A*02:01	ILMSPNSYIKL	11	5	0.958088	Protein	Q8TEM1	ILMSPNIKL	94.57	0.405	1.045	TRUE	FALSE	FALSE
A*02:01	ILMTLTVKV	9	3	0.950919	Protein	P16885;B4E3H3;A0A0A0MRF9	ILMTLTVKV	4.4	0.024	0.025	FALSE	FALSE	FALSE
A*02:01	ILNEFPGHGL	10	2	0.552978	Protein	B4DGQ2;A0A090HNM7;A0A1W2PS85;P28715;P28715-2	ILNEFPHGL	81.16	0.288	0.934	TRUE	FALSE	FALSE
A*02:01	ILNEIVNFV	9	1	0.828155	Protein	B4E0R6;B3KWG6;H0Y8C6;O00410-2;O00410-3	ILNEIVNFV	3.25	0.007	0.01	TRUE	FALSE	FALSE
A*02:01	ILNEVDISV	9	2	0.731333	Protein	Q6ZR29;A0A286YEZ9;B3KXG5;A0A2C9F2R7;H0Y9X0	ILNEVDISV	4.85	0.01	0.03	TRUE	FALSE	FALSE
A*02:01	ILNKQEFFV	9	1	0.807438	Protein	P42566;Q7Z5V0;B1AUU8	ILNKQEFFV	6.59	0.071	0.065	TRUE	FALSE	FALSE
A*02:01	ILNNKIPEA	9	3	0.810852	Protein	C4B7M4;Q96JI7;H0YN34;Q96JI7-2;Q96JI7-3	ILNNKIPEA	35.7	0.051	0.506	TRUE	FALSE	FALSE
A*02:01	ILNNLKAFL	9	4	0.853224	Protein	H0YIE9;Q8IUQ5;O94952-1;Q4G104;O94952	ILNNLKAFL	27.51	0.296	0.407	FALSE	FALSE	FALSE
A*02:01	ILNPEVVTV	9	2	0.818602	Protein	Q9UK61-4;Q9UK61;A0A024R363;Q9UK61-2;A0A087X0F1	ILNPEVVTV	6.63	0.002	0.066	TRUE	FALSE	FALSE
A*02:01	ILNPVTTKL	9	1	0.790684	Protein	H3BM72;A0A024R390;Q96IC2;Q96IC2-2;H3BQ98	ILNPVTTKL	31.43	0.015	0.458	TRUE	FALSE	FALSE
A*02:01	ILNTLNITV	9	3	0.759976	Protein	Q8TCJ2	ILNTLNITV	9.08	0.058	0.111	TRUE	FALSE	FALSE
A*02:01	ILNYVLVRV	9	3	0.846939	Protein	H0YMV7;O95072-2;O95072	ILNYVLVRV	10.68	0.074	0.142	TRUE	FALSE	FALSE
A*02:01	ILPEEITNLR	10	2	0.749433	Protein	Q9H9A6;A0A140VJN3	ILPEEITNL	3007.7	2.944	7.193	FALSE	TRUE	FALSE
A*02:01	ILQDRLNQV	9	2	0.792406	Protein	A0A024R1S2;B2R935;Q99741	ILQDRLNQV	12.91	0.016	0.174	TRUE	FALSE	FALSE
A*02:01	ILQNKIDLV	9	10	0.844052	Protein	Q2VIR3-2;P41091;Q2VIR3	ILQNKIDLV	36.78	0.143	0.518	TRUE	FALSE	FALSE
A*02:01	ILQQHIATV	9	5	0.838852	Protein	Q9Y575-3;A0A0A6YYF3;Q9Y575;Q53H66;Q53HI5	ILQQHIATV	11.91	0.021	0.161	TRUE	FALSE	FALSE
A*02:01	ILQTKLYTL	9	1	0.531697	Protein	A0A1V1G0E9;A0A386NCL5;P49815-6;X5D9K3;X5D9D6	ILQTKLYTL	24.43	0.061	0.362	TRUE	FALSE	FALSE
A*02:01	ILSEFSSKL	9	3	0.959919	Protein	Q6MZP3;B2R8Y6;Q6AI02;Q8N3U4;Q8N3U4-2	ILSEFSSKL	17.26	0.038	0.249	TRUE	FALSE	FALSE
A*02:01	ILSEIKEAV	9	1	0.907272	Protein	H3BQ53;Q9BQ70;Q9H384	ILSEIKEAV	17.27	0.035	0.249	TRUE	FALSE	FALSE
A*02:01	ILSELAPSL	9	3	0.887446	Protein	Q86X83;Q86X83-2;F8WBW1	ILSELAPSL	8.84	0.015	0.105	TRUE	FALSE	FALSE
A*02:01	ILSELVEKI	9	1	0.928727	Protein	B4DTX4;A0A024RAL2;P20936-4;B4DTL8;P20936	ILSELVEKI	22.26	0.029	0.326	TRUE	FALSE	FALSE
A*02:01	ILSESANRIFL	11	1	0.852913	Protein	A0A2R8YFQ8;B7ZLZ8;A0A2R8YE40;F8W7S1;A0A2R8YF99	ILSESAIFL	128.27	0.817	1.268	TRUE	FALSE	FALSE
A*02:01	ILSESLHSL	9	6	0.907935	Protein	O43156;Q3B768	ILSESLHSL	6.81	0.006	0.07	TRUE	FALSE	FALSE
A*02:01	ILSEVQQAV	9	11	0.87609	Protein	P09874;A0A024R3T8;B4E0E1;B2R5W3	ILSEVQQAV	8.61	0.011	0.1	TRUE	FALSE	FALSE
A*02:01	ILSGVIRSV	9	7	0.738629	Non-coding	NR_073560-1	ILSGVIRSV	16.81	0.037	0.241	TRUE	FALSE	FALSE
A*02:01	ILSKDGVLYV	10	1	0.555478	Protein	A0A2R8YF63;H0Y564;Q9H1A4	ILSDGVLYV	7.65	0.072	0.083	FALSE	FALSE	FALSE
A*02:01	ILSPTVVSI	9	1	0.777303	Protein	P52732;B2RAM6	ILSPTVVSI	17.62	0.02	0.255	TRUE	FALSE	FALSE
A*02:01	ILSQYITFV	9	4	0.816508	Protein	A0A024R912;Q9BZX2-2;Q9BZX2;A0A2R8Y653	ILSQYITFV	3.81	0.027	0.015	TRUE	FALSE	FALSE
A*02:01	ILSVFIPSL	9	4	0.925838	Protein	E5RIN5;A8K4Z3;F8WEN5;Q07326;Q6IB04	ILSVFIPSL	11.47	0.065	0.155	TRUE	FALSE	FALSE
A*02:01	ILTEAIKAA	9	6	0.967723	Protein	Q99575;Q96F88	ILTEAIKAA	229.8	0.492	1.811	TRUE	FALSE	FALSE
A*02:01	ILTELRRL	8	1	0.785133	Protein	A0A0A0MRP0;Q8IWC1;Q8IWC1-4;Q8IWC1-2;Q8IWC1-3	ILTEL-RRL	10855.2	5.719	15.591	FALSE	FALSE	FALSE
A*02:01	ILTESEIKL	9	8	0.964363	Protein	C4P0D8;Q7Z3N9;A0A024R3V8;C4P0D4;C4P0D6	ILTESEIKL	54.38	0.045	0.702	TRUE	FALSE	FALSE
[truncated: 161,657 more rows]
