# Supplementary material for: Unsupervised Mining of HLA-I Peptidomes Reveals New Binding Motifs and Potential False Positives in the Community Database
Source: Front Immunol. 2022 Mar 21;13:847756. doi: 10.3389/fimmu.2022.847756 (PMC8977642; doi:10.3389/fimmu.2022.847756)
Supplement: Supplementary file 3 [file Table_2.xlsx]

## Sheet: Sheet1
Allele	Identified Peptides	Outlier Peptides	Outlier Percentage			SMSNet			Sarkizova et al.*
B*14:02	1087	70	6.43974		Allele	Identified Peptides	Tryptic Peptides	Tryptic Percentage	Identified Peptides	Tryptic Peptides	Tryptic Percentage
A*02:05	2840	165	5.80986		B*35:01	862	390	45.2436	1113	295	26.5049
B*52:01	1550	82	5.29032		B*57:01	766	319	41.6449	1555	368	23.6656
A*30:01	1404	73	5.19943		C*03:03	3071	1113	36.2423	3411	968	28.3788
A*02:11	1850	89	4.81081		B*54:01	828	254	30.6763	1574	188	11.9441
C*08:01	1647	78	4.73588		A*36:01	2292	696	30.3665	2858	635	22.2183
A*02:02	3048	142	4.65879		A*68:02	1584	382	24.1162	2665	418	15.6848
C*07:01	773	36	4.65718		C*02:02	1088	247	22.7022	1323	280	21.164
A*32:01	1698	77	4.53475		B*51:01	1511	287	18.994	1875	169	9.01333
B*56:01	1546	67	4.33376		A*29:02	950	145	15.2632	1226	95	7.74878
C*12:03	1932	82	4.24431		A*23:01	2455	349	14.2159	3033	369	12.1662
C*17:01	1064	42	3.94737		B*37:01	1616	225	13.9233	1870	204	10.9091
B*13:01	3885	153	3.93822
A*02:01	2845	106	3.72583		*Peptides previously identified by Sarkizova et al. "A large peptidome dataset improves HLA class I epitope prediction across most of the human population". Nature Biotechnology, 38:199-209 (2020)
C*08:02	2904	95	3.27135
B*35:03	1317	38	2.88535
B*40:02	3573	95	2.65883
A*31:01	1522	39	2.56242
B*49:01	3708	52	1.40237
B*58:01	1398	18	1.28755
B*50:01	409	3	0.733496
