# Supplementary material for: Unsupervised Mining of HLA-I Peptidomes Reveals New Binding Motifs and Potential False Positives in the Community Database
Source: Front Immunol. 2022 Mar 21;13:847756. doi: 10.3389/fimmu.2022.847756 (PMC8977642; doi:10.3389/fimmu.2022.847756)
Supplement: Supplementary file 4 [file Table_3.xlsx]

## Sheet: Sheet1
HLA Allele	Peptide	Source	Predicted Core Motif	Predicted Binding Affinity	Is Outlier	Binding Test	Reported*
B*14:02	QQFAHPPL	Protein	QQFAHPP-L	3027.32	FALSE	82.8	New
B*14:02	SQYQRLLCI	Protein	SQYQRLLCI	297.88	FALSE	80.3	SQYQRLLCI
B*14:02	LPFCRPGPEGQL	Protein	LPFGPEGQL	8986.51	TRUE	75.9	LPFCRPGPEGQL
B*14:02	QTWWHGVL	Protein	QTWWHG-VL	12385.7	FALSE	74.6	New
B*14:02	NQFQRQAAV	Protein	NQFQRQAAV	119.08	FALSE	63.6	New
B*14:02	CRFEGQFSI	Protein	CRFEGQFSI	1798.35	FALSE	63.5	CRFEGQFSI
B*14:02	DQFLKICL	Protein	DQFLK-ICL	1379.84	FALSE	62.6	DQFLKICL
B*14:02	DRYLPGETF	Protein	DRYLPGETF	1796.48	FALSE	61.4	New
B*14:02	LRNGGHFVI	Protein	LRNGGHFVI	2191.5	TRUE	61.2	New
B*14:02	LPFCHSEL	Protein	LPFCHS-EL	5974.08	FALSE	60.2	New
B*14:02	ETASDLLLHSAL	Protein	ETASLHSAL	21538.8	FALSE	59.3	New
B*14:02	QQLCHQTL	Protein	QQLCH-QTL	7469.48	FALSE	56.8	New
B*14:02	CQVTHISL	Protein	CQVTH-ISL	6288.59	FALSE	56.7	New
B*14:02	LPIIHCTL	Protein	LPI-IHCTL	8311.13	FALSE	56.4	New
B*14:02	QQILRDAL	Non-coding	QQILRD-AL	5749.03	FALSE	56.2	New
B*14:02	CHIYHHAL	Protein	CHIYH-HAL	968.73	FALSE	55.5	New
B*14:02	TRIEKRIVI	Protein	TRIEKRIVI	233.81	FALSE	54.9	New
B*14:02	HQITHQAM	Protein	HQITH-QAM	3938.47	FALSE	52.4	New
B*14:02	YQILHECL	Protein	YQILH-ECL	5854.42	FALSE	50.1	YQILHECL
B*14:02	QPAEHLQL	Protein	QPAEH-LQL	16399.7	FALSE	49.4	New
B*14:02	QQGTHLSL	Protein	QQGTH-LSL	8949.74	FALSE	47.7	New
B*14:02	LGFTHHCL	Protein	LGF-THHCL	9764.73	FALSE	47.6	LGFTHHCL
B*14:02	SRLDSVLLL	Non-coding	SRLDSVLLL	1815.69	FALSE	43.9	New
B*14:02	YATLHHVI	Protein	YAT-LHHVI	7308.4	FALSE	42.2	New
B*14:02	CDFVHQAL	Protein	CDF-VHQAL	20735.2	FALSE	41.7	CDFVHQAL
B*14:02	DQYKRETI	Protein	DQY-KRETI	3136.89	FALSE	33.9	New
B*14:02	CVTIHEAL	Protein	CVT-IHEAL	26077.5	FALSE	32.1	New
B*14:02	HPASHPEL	Protein	HPASHP-EL	11892.2	FALSE	29.9	New
B*14:02	DNAVHCVI	Protein	DNA-VHCVI	10295.7	FALSE	26.2	New
B*14:02	CEVTHQGL	Protein	CEV-THQGL	27265.4	FALSE	25.4	New
B*14:02	FGYSRHTPF	Unknown	FGYSRHTPF	233.11	FALSE	24.8	New
B*14:02	SPTCHACL	Protein	SPTCHA-CL	16271.5	FALSE	19.8	New
B*14:02	DLPEHAVL	Protein	DLPEH-AVL	12936.3	FALSE	14.2	New
B*14:02	SCRVHKII	Non-coding	SCRVHKI-I	34331.7	FALSE	8.3	New
B*14:02	LNVLHLDT	Non-coding	LNVLH-LDT	39188.1	FALSE	5	New
B*14:02	LNQRAQAVL	Non-coding	LNQRAQAVL	8710.33	TRUE	3.1	New
B*14:02	RPPGFSPFR	Protein	RPPGFSPFR	34541.4	TRUE	0.9	New
B*14:02	LLSPQQTI	Non-coding	LLS-PQQTI	30378.6	FALSE	0.8	New
B*14:02	PLGMNQLQAL	Non-coding	LGMNQLQAL	27718.7	FALSE	0.3	New
B*14:02	AAPARVSVA	Non-coding	AAPARVSVA	9784.3	TRUE	0.2	New
B*14:02	AQGGVLPNI	Non-coding	AQGGVLPNI	26062.8	TRUE	0.2	New
B*14:02	AVSMIPPLLL	Non-coding	ASMIPPLLL	27872.1	TRUE	0.2	New
B*14:02	DQVGGLGR	Protein	DQVGG-LGR	40088.2	FALSE	0.2	New
B*14:02	IHTLVESL	Protein	IHT-LVESL	11994.7	FALSE	0.2	New
B*14:02	LSYVSIMAAI	Non-coding	LSYVSIMAI	15357.7	FALSE	0.2	New
B*14:02	LTGDIHAITAA	Non-coding	LTIHAITAA	35630.1	TRUE	0.2	New
B*14:02	QAYMNQRKL	Non-coding	QAYMNQRKL	5360.1	FALSE	0.2	New
B*14:02	SSSKGSLGGGF	Protein	SSSKGSLGF	34611.8	FALSE	0.2	SSSKGSLGGGF
B*14:02	ESGPSIVHRKCF	Protein	ESGPSIVHF	37650.2	TRUE	0.1	ESGPSIVHRKCF
B*14:02	GLGILDPVLL	Non-coding	GGILDPVLL	37016.5	FALSE	0.1	New
B*14:02	IRLENEIQ	Protein	IRLENEIQ-	41839.1	FALSE	0.1	New
B*14:02	LSSLSLPILI	Protein	LSSSLPILI	28210	TRUE	0.1	New
B*14:02	QEVKQGKLL	Non-coding	QEVKQGKLL	26147.6	FALSE	0.1	New
B*14:02	QVWGTLTSL	Non-coding	QVWGTLTSL	10086.9	FALSE	0.1	New
B*14:02	TYDDATKTF	Unknown	TYDDATKTF	16679.4	TRUE	0.1	TYDDATKTF
B*14:02	QGLSILLPKI	Non-coding	QGLSILLKI	29699.7	TRUE	0	New
B*14:02	REQFSSRGS	Unknown	REQFSSRGS	39701.5	TRUE	0	New
B*14:02	TYDDATKTFTVTE	Unknown	TYDDATVTE	40305.3	FALSE	0	New
B*14:02	VAPGKDLTK	Protein	VAPGKDLTK	36877.8	FALSE	0	New
*Reported refers to peptides that were also previously identified by Sarkizova et al. "A large peptidome dataset improves HLA class I epitope prediction across most of the human population". Nature Biotechnology, 38:199-209 (2020)
