# Supplementary material for: Unsupervised Mining of HLA-I Peptidomes Reveals New Binding Motifs and Potential False Positives in the Community Database
Source: Front Immunol. 2022 Mar 21;13:847756. doi: 10.3389/fimmu.2022.847756 (PMC8977642; doi:10.3389/fimmu.2022.847756)
Supplement: Supplementary file 5 [file Table_4.xlsx]

## Sheet: Sheet1
SMSNet	1+ charge (1zup)	2+ charge (1zup)	2+ charge (2zup)	Overlap	Overlap (%)
HLA class I peptidome	2598	2537	2099	1458	45.8779
HLA class II peptidome	903	898	263	263	29.2873
PEAKS-DB	1+ charge (1zup)	2+ charge (1zup)	2+ charge (2zup)	Overlap	Overlap (%)
HLA class I peptidome	2492	2478	2157	1189	34.5038
HLA class II peptidome	1535	1535	964	327	15.0552
SMSNet and PEAKS-DB	1+ charge (1zup)	2+ charge (1zup)	2+ charge (2zup)	Overlap	Overlap (%)
HLA class I peptidome	1733	1719	1547	1154	54.6402
HLA class II peptidome	644	644	255	255	39.5963
