# Supplementary material for: Unsupervised Mining of HLA-I Peptidomes Reveals New Binding Motifs and Potential False Positives in the Community Database
Source: Front Immunol. 2022 Mar 21;13:847756. doi: 10.3389/fimmu.2022.847756 (PMC8977642; doi:10.3389/fimmu.2022.847756)
Supplement: Supplementary file 6 [file Table_5.xlsx]

## Sheet: Supplementary Table 5
File Name	Scan Number	SMSNet Mass Error (ppm)	SMSNet Score	SMSNet Peptide	SMSNet Affinity	SMSNet Allele	PEAKS-DB Mass Error (ppm)	PEAKS-DB Score	PEAKS-DB Peptide	PEAKS-DB Affinity	PEAKS-DB Allele	PEAKS-DeNovo Mass Error (ppm)	PEAKS-DeNovo Score	PEAKS-DeNovo Peptide	PEAKS-DeNovo Affinity	PEAKS-DeNovo Allele
1zup_BLCL1408_F1	3074						-0.2	0.934976	GGGGSSGGRGSGGGSSGGSIGGRGSSSGGVKSSGGSSS	0.006569	HLA-A01:01
1zup_BLCL1408_F1	5791	-3.93465	0.476111	SRSGGGGGGGLGSGGSIRSSY	0.024126	HLA-A01:01
1zup_BLCL1408_F1	8085											-8.1	0.76	QNEVEEER	0.500015	HLA-A01:01
1zup_BLCL1408_F1	8602						0	0.903093	SSVFnTGVQEGAK
1zup_BLCL1408_F1	9722											-8.5	0.76	LEEVEENKRQ	0.229924	HLA-A01:01
1zup_BLCL1408_F1	9828											-8.5	0.92	NQEVEEERLK	0.501065	HLA-A01:01
1zup_BLCL1408_F1	11580											-0.2	0.85	YLYELAR
1zup_BLCL1408_F1	12048											-0.5	0.84	VVFPSLVGRPR	0.500334	HLA-A01:01
1zup_BLCL1408_F1	12070											4.8	0.77	HVLPSLRRPR	0.500219	HLA-A01:01
1zup_BLCL1408_F1	12422	0.504287	0.946667	KVPQVSTPTLVEVSR	0.496226	HLA-A01:01
1zup_BLCL1408_F1	13536											0	0.94	YLDFVR
1zup_BLCL1408_F1	14115											7.4	0.74	RTQLTQR
1zup_BLCL1408_F1	14137											-0.5	0.82	VGLQFPVGR	0.500038	HLA-C07:01
1zup_BLCL1408_F1	14590											0.1	0.8	RLQNLLAFRLSH	0.499979	HLA-A01:01
1zup_BLCL1408_F1	15642											0.6	0.92	VVLQLmQLQTR
1zup_BLCL1408_F1	15708											2.1	0.73	LGEGAVTKVEGL	0.496298	HLA-A01:01
1zup_BLCL1408_F1	15751											0.6	0.78	VVLQLmQLGTAR
1zup_BLCL1408_F1	16292											0.1	0.71	TGnHCELyF
1zup_BLCL1408_F1	16340											1	0.81	EGAPLEYGEF	0.502424	HLA-A01:01
1zup_BLCL1408_F1	16373											5	0.9	LPQEFsWF
1zup_BLCL1408_F1	16378											-0.1	0.74	LFECnGCCLF
1zup_BLCL1408_F1	16443											1	0.8	PQEEYGLEF	0.515316	HLA-A01:01
1zup_BLCL1408_F1	16703											1	0.74	KnPLLVPQ
1zup_BLCL1408_F1	17300											0.4	0.7	EEPELYGEF	0.502828	HLA-A01:01
1zup_BLCL1408_F1	17514											0	0.81	GRVLQLF
1zup_BLCL1408_F1	17612											0	0.83	GRVLQLF
1zup_BLCL1408_F1	18350											-6.2	0.76	WKRAA
1zup_BLCL1408_F1	18510											-0.6	0.7	KEVALPLVPQ	0.50005	HLA-A01:01
1zup_BLCL1408_F1	18629											-4.2	0.81	QWKLG
1zup_BLCL1408_F1	21343											-4.2	0.75	LLRYQ
1zup_BLCL1408_F1	25349											-9.9	0.78	SVLLLMN
1zup_BLCL1408_F1	26751											-5.6	0.7	KAANKTT
1zup_BLCL1408_F1	30191											4.7	0.79	ssKSV
1zup_BLCL1408_F1	30223											-9.3	0.71	VSLLKPP
1zup_BLCL1408_F2	1358											8	0.74	HAKAKGNLHV	0.531613	HLA-B08:01
1zup_BLCL1408_F2	1363											-1.1	0.72	HAVRKKTTA	0.763644	HLA-B08:01
1zup_BLCL1408_F2	1364											-3.7	0.85	HAKLFRRF	0.614641	HLA-B08:01
1zup_BLCL1408_F2	1365											-1	0.86	KTHHVHLK	0.500775	HLA-A01:01
1zup_BLCL1408_F2	1367											-2	0.71	KKEQKEKL	0.502818	HLA-B08:01
1zup_BLCL1408_F2	1369											-9.9	0.79	ELKRKRSNGA	0.513735	HLA-B08:01
1zup_BLCL1408_F2	1560											0	0.77	ELLGSKKKEL	0.616094	HLA-B08:01
1zup_BLCL1408_F2	1763											-0.2	0.76	DVKALKKRE	0.500042	HLA-B08:01
1zup_BLCL1408_F2	2065											-1.6	0.83	DLVKGTVSAV	0.505342	HLA-B08:01
1zup_BLCL1408_F2	2089											-1.7	0.74	HVKTHHLK
1zup_BLCL1408_F2	2099											-0.7	0.82	LGKKKLKR	0.394448	HLA-A01:01
1zup_BLCL1408_F2	3000											-0.3	0.79	TPKSQLQAL	0.957309	HLA-B08:01
1zup_BLCL1408_F2	3015											9.7	0.74	TTKSFSPVNT	0.500632	HLA-A01:01
1zup_BLCL1408_F2	3028											5	0.86	LSVKWPKVs
1zup_BLCL1408_F2	3071											-5.6	0.88	LFFKATVGL	0.509543	HLA-C07:01
1zup_BLCL1408_F2	3106											9.2	0.75	APMQLDYR	0.499322	HLA-A01:01
1zup_BLCL1408_F2	3117						0.6	0.920421	YTDHQNSSSY	0.998561	HLA-A01:01
1zup_BLCL1408_F2	3126						-0.5	0.897613	YSDRSSGGSY	0.995852	HLA-A01:01
1zup_BLCL1408_F2	3232	-1.64	0.689091	VTEQDSKDSTY	0.98352	HLA-A01:01	0.4	0.927633	VTEQDSKDSTY	0.98352	HLA-A01:01
1zup_BLCL1408_F2	3365											0.9	0.89	SSnVSHQEY
1zup_BLCL1408_F2	3456											-0.1	0.7	TSnKGSPYP
1zup_BLCL1408_F2	3602	0.235125	0.94125	YTDATSKY	0.985203	HLA-A01:01	0.4	0.905768	YTDATSKY	0.985203	HLA-A01:01
1zup_BLCL1408_F2	6257											0.7	0.71	ERQFRSSSGY	0.512037	HLA-A01:01
1zup_BLCL1408_F2	6278											0.4	0.73	YTnEQNSSTTY
1zup_BLCL1408_F2	6439											1	0.93	DPnSETAGSTKY
1zup_BLCL1408_F2	6449											5.9	0.82	TDEYSEEEKY	0.653831	HLA-A01:01
1zup_BLCL1408_F2	6799											-2	0.84	TTDYEDHGGY	0.992789	HLA-A01:01
1zup_BLCL1408_F2	6993											5.7	0.7	DHTACRSTAY	0.547345	HLA-A01:01
1zup_BLCL1408_F2	7369											-9.1	0.7	YSynEGNLSY
1zup_BLCL1408_F2	7406											-3.6	0.89	STDTSYGtLSY
1zup_BLCL1408_F2	7462											-0.5	0.83	THDGGGGGAGVQDY	0.522316	HLA-A01:01
1zup_BLCL1408_F2	7709											-1.3	0.76	KEQDEFEK	0.500079	HLA-A01:01
1zup_BLCL1408_F2	8311											0.2	0.77	ESPDAQRATTTY	0.641569	HLA-A01:01
1zup_BLCL1408_F2	8528											5.2	0.74	KsCCQFEK
1zup_BLCL1408_F2	8573											1	0.86	ETGPSGSDNY	0.816439	HLA-A01:01
1zup_BLCL1408_F2	8611											9.3	0.7	QHsAPLQH
1zup_BLCL1408_F2	8617											-9.9	0.76	HQSEmTQH
1zup_BLCL1408_F2	8904											3.1	0.74	DPCCMAPCGmY
1zup_BLCL1408_F2	9399											-7.5	0.77	PDTPAPLCY	0.562016	HLA-A01:01
1zup_BLCL1408_F2	16529											1.1	0.73	PQEELYGEF	0.507445	HLA-A01:01
1zup_BLCL1408_F2	18536											-6.1	0.78	KWRAA
1zup_BLCL1408_F2	18843											-4.4	0.7	QWKAV
1zup_BLCL1408_F2	21519											-4.8	0.72	QWVAK
1zup_BLCL1408_F2	22836											-7.5	0.7	QMHPQ
1zup_BLCL1408_F2	26514											-0.5	0.73	AAHAAMQ
1zup_BLCL1408_F2	26669											-4.5	0.72	CTKWQ
1zup_BLCL1408_F2	27721											-9.4	0.71	ssNCV
1zup_BLCL1408_F2	29134											-0.2	0.72	WDmH
1zup_BLCL1408_F2	29328											0.4	0.71	NGYWQ
1zup_BLCL1408_F2	30305											4.8	0.8	EEYs
1zup_BLCL1408_F3	2505											0.1	0.87	HKKRKYEL	0.821954	HLA-B08:01
1zup_BLCL1408_F3	2570											0.9	0.72	HKKKRYEL	0.835239	HLA-B08:01
1zup_BLCL1408_F3	2594											0.1	0.91	HKKRKYEL	0.821954	HLA-B08:01
1zup_BLCL1408_F3	2683											0.1	0.85	HKKRKYEL	0.821954	HLA-B08:01
1zup_BLCL1408_F3	2777											0.1	0.78	HKKKRYEL	0.835239	HLA-B08:01
1zup_BLCL1408_F3	2843											0.9	0.72	HKKKRYEL	0.835239	HLA-B08:01
1zup_BLCL1408_F3	2869											0.1	0.76	HKKKRYEL	0.835239	HLA-B08:01
1zup_BLCL1408_F3	2932											0.9	0.78	HKKRKYEL	0.821954	HLA-B08:01
1zup_BLCL1408_F3	2958											0.1	0.79	HKKRKYEL	0.821954	HLA-B08:01
1zup_BLCL1408_F3	2981											-1.9	0.76	LLQVKKELQL	0.555449	HLA-B08:01
1zup_BLCL1408_F3	2984											0.4	0.82	EAHAKVRL	0.793772	HLA-B08:01
1zup_BLCL1408_F3	2994						-0.3	0.957276	HIKHRVQEL	0.991989	HLA-B08:01
1zup_BLCL1408_F3	2995						-0.4	0.956587	HVHLKKSL	0.966682	HLA-B08:01
1zup_BLCL1408_F3	2996											-0.7	0.73	ELHLRLHL	0.930195	HLA-B08:01
1zup_BLCL1408_F3	3006											0.9	0.79	HPLRRLLEHH	0.500165	HLA-A01:01
1zup_BLCL1408_F3	3007											2.6	0.7	LEEVHNKSEL	0.500343	HLA-A01:01
1zup_BLCL1408_F3	3009											9.6	0.77	LLKQYHKL	0.776545	HLA-B08:01
1zup_BLCL1408_F3	3021											-0.4	0.71	TLVKKRFK	0.500011	HLA-A01:01
1zup_BLCL1408_F3	3033											-1.1	0.72	HLLKRRTL	0.96474	HLA-B08:01
1zup_BLCL1408_F3	3035						0.6	0.879848	YRHQRIHSL	0.934878	HLA-B08:01
1zup_BLCL1408_F3	3047											-0.7	0.77	HLYKKRNVL	0.99245	HLA-B08:01
1zup_BLCL1408_F3	3054											0.2	0.87	LFRHKHEL	0.744918	HLA-B08:01
1zup_BLCL1408_F3	3063											-0.5	0.93	SLKKKLKEL	0.99091	HLA-B08:01
1zup_BLCL1408_F3	3065											-0.6	0.75	HLYKKRNVL	0.99245	HLA-B08:01
1zup_BLCL1408_F3	3066											-0.3	0.74	VRKVKVVR	0.479618	HLA-B08:01
1zup_BLCL1408_F3	3070											0.1	0.78	HKKYKREL	0.663627	HLA-B08:01
1zup_BLCL1408_F3	3071											9.4	0.76	HALAERAHQL	0.691675	HLA-B08:01
1zup_BLCL1408_F3	3075						-0.6	0.981127	HRQVRKYVM	0.733664	HLA-B08:01
1zup_BLCL1408_F3	3077	-0.880628	0.923333	SIKKKIKEL	0.991315	HLA-B08:01						0.3	0.97	LSKKKLKEL	0.926276	HLA-B08:01
1zup_BLCL1408_F3	3084											-2.7	0.78	LLELAKHLL	0.529678	HLA-B08:01
1zup_BLCL1408_F3	3085											-4.7	0.77	KHKFKEVV
1zup_BLCL1408_F3	3106											0.5	0.89	LHKKARLL	0.569225	HLA-B08:01
1zup_BLCL1408_F3	3108	-0.459831	0.792222	ALKAKKAVL	0.951955	HLA-B08:01	-0.2	0.895754	ALKAKKAVL	0.951955	HLA-B08:01
1zup_BLCL1408_F3	3113											0.3	0.8	KLNKKLRAL	0.888505	HLA-B08:01
1zup_BLCL1408_F3	3116						-0.6	0.944368	HAHGRHFNL	0.931943	HLA-B08:01
1zup_BLCL1408_F3	3122	0.173309	0.947778	ELKHHHVTL	0.994641	HLA-B08:01	1.3	0.980099	ELKHHHVTL	0.994641	HLA-B08:01
1zup_BLCL1408_F3	3125											-3	0.78	LLKFKEKL
1zup_BLCL1408_F3	3127	0.074069	0.842222	TPKEKAQAL	0.99032	HLA-B08:01	0	0.970103	TPKEKAQAL	0.99032	HLA-B08:01
1zup_BLCL1408_F3	3132											1.6	0.73	LLKERKDL	0.825855	HLA-B08:01
1zup_BLCL1408_F3	3143											-9.4	0.71	MVHKNWPVL	0.59161	HLA-B08:01
1zup_BLCL1408_F3	3145						-0.4	0.895754	TLRKKDVL	0.849432	HLA-B08:01
1zup_BLCL1408_F3	3153						-0.2	0.972346	HPHLRKVSV	0.968259	HLA-B08:01
1zup_BLCL1408_F3	3154											-0.8	0.77	TLMRHHLT	0.506972	HLA-B08:01
1zup_BLCL1408_F3	3163						-1.8	0.946869	TAIRHHVL	0.836801	HLA-B08:01
1zup_BLCL1408_F3	3172											-4.5	0.77	LRNKLHRL
1zup_BLCL1408_F3	3175						1.1	0.984989	HPKYKTEL	0.961584	HLA-B08:01
1zup_BLCL1408_F3	3185											-1.1	0.73	LLRNKLLHR
1zup_BLCL1408_F3	3186						0.9	0.989867	HRKAKYLL	0.634273	HLA-B08:01
1zup_BLCL1408_F3	3196						0.2	0.975449	ELRKKKIEEAM	0.717125	HLA-B08:01
1zup_BLCL1408_F3	3198											-1.1	0.83	FLHKKLRL
1zup_BLCL1408_F3	3204											0.1	0.76	HLLGRHLR	0.501927	HLA-B08:01
1zup_BLCL1408_F3	3208											0.5	0.73	ELKKRFRQL	0.994612	HLA-B08:01
1zup_BLCL1408_F3	3209	0.388516	0.685385	PFEPPKPKTKHKL	0.468495	HLA-A01:01	0.7	0.991138	PFEPPKPKTKHKL	0.468495	HLA-A01:01
1zup_BLCL1408_F3	3211						0.2	0.897613	EIKKRFRQL	0.98723	HLA-B08:01
1zup_BLCL1408_F3	3218						-1.9	0.902607	RLKEKRLQAL	0.792477	HLA-B08:01
1zup_BLCL1408_F3	3223	0.554414	0.936667	DLKEKKEVV	0.944889	HLA-B08:01	0.4	0.968031	DLKEKKEVV	0.944889	HLA-B08:01
1zup_BLCL1408_F3	3232											-1.8	0.8	LLNKRKAL	0.860271	HLA-B08:01
1zup_BLCL1408_F3	3239	-0.572049	0.86625	LIKLHHKL	0.86174	HLA-B08:01						0	0.92	LLKLHHKL	0.895874	HLA-B08:01
1zup_BLCL1408_F3	3242											7.1	0.7	APMYHVYL	0.625759	HLA-B08:01
1zup_BLCL1408_F3	3246											-3.6	0.7	LHLLHGHVL	0.550549	HLA-B08:01
1zup_BLCL1408_F3	3253											1.3	0.82	LERRKLREL	0.663012	HLA-B08:01
1zup_BLCL1408_F3	3255											0.1	0.7	YLKRKRLF	0.847102	HLA-B08:01
1zup_BLCL1408_F3	3256											0.4	0.76	LLRKLRHL	0.688644	HLA-B08:01
1zup_BLCL1408_F3	3263						0.5	0.9738	FNHKREIHL	0.791455	HLA-B08:01
1zup_BLCL1408_F3	3273						-4	0.895754	AFKLKRKEL	0.799816	HLA-B08:01	-0.1	0.78	YLLRKHRF	0.701908	HLA-B08:01
1zup_BLCL1408_F3	3275	-1.3831	0.802222	LIKEKHYHL	0.981856	HLA-B08:01	-0.1	0.930609	LIKEKHYHL	0.981856	HLA-B08:01
1zup_BLCL1408_F3	3279											-3.2	0.76	HLLELGQLL
1zup_BLCL1408_F3	3289											-3.1	0.73	LQKVVGVQL	0.545789	HLA-B08:01
1zup_BLCL1408_F3	3290	-1.51265	0.7825	HIVEKRVL	0.832976	HLA-B08:01						-0.1	0.94	LHVEKRVL	0.535663	HLA-B08:01
1zup_BLCL1408_F3	3291	-0.875676	0.792222	NTDRNIDKY	0.995066	HLA-A01:01
1zup_BLCL1408_F3	3292											-0.9	0.78	MKLKVRKEL	0.544656	HLA-B08:01
1zup_BLCL1408_F3	3300						-0.5	0.934715	ESFKKRVI	0.624143	HLA-B08:01
1zup_BLCL1408_F3	3303											0	0.71	RGVRRVQL	0.636582	HLA-B08:01
1zup_BLCL1408_F3	3311						0.2	0.979514	HIRDRAHIL	0.972664	HLA-B08:01
1zup_BLCL1408_F3	3315											2.8	0.74	YLKRLRKF	0.688236	HLA-B08:01
1zup_BLCL1408_F3	3318						-1.8	0.969193	RPHHKILDM	0.768548	HLA-B08:01
1zup_BLCL1408_F3	3320						0.2	0.898226	DLIKHRRI	0.66651	HLA-B08:01
1zup_BLCL1408_F3	3321	-0.139538	0.631818	MPKLKAKPIRT	0.50269	HLA-B08:01	-0.2	0.962259	MPKLKAKPIRT	0.50269	HLA-B08:01
1zup_BLCL1408_F3	3326											1.4	0.72	FNHKKAAQHL	0.528257	HLA-B08:01
1zup_BLCL1408_F3	3330	-0.124918	0.877778	AALKKALAA	0.607238	HLA-B08:01	-0.9	0.9709	AALKKALAA	0.607238	HLA-B08:01
1zup_BLCL1408_F3	3333	-0.162252	0.643846	RTERPPNKEIVRY	0.754037	HLA-A01:01	0.6	0.983885	RTERPPNKEIVRY	0.754037	HLA-A01:01
1zup_BLCL1408_F3	3336						-0.4	0.883399	EQIKKTEL	0.730848	HLA-B08:01
1zup_BLCL1408_F3	3346	0.194994	0.673333	HLRKYNEAL	0.914105	HLA-B08:01	-0.3	0.983194	HLRKYNEAL	0.914105	HLA-B08:01
1zup_BLCL1408_F3	3348						-0.6	0.929842	SSDRHLTQY	0.995541	HLA-A01:01
1zup_BLCL1408_F3	3354											0.5	0.72	TLKKKFRVL	0.993491	HLA-B08:01
1zup_BLCL1408_F3	3356						-0.7	0.952404	RVHIRSEL	0.783771	HLA-B08:01
1zup_BLCL1408_F3	3358	-0.497554	0.8425	RPLVKPKI	0.590725	HLA-B08:01						-0.2	0.73	LRPVKPKL	0.567625	HLA-B08:01
1zup_BLCL1408_F3	3360						-0.6	0.912577	RAKVKFNV	0.66127	HLA-B08:01
1zup_BLCL1408_F3	3366						-1.9	0.880925	DLLRHHRI	0.581889	HLA-B08:01
1zup_BLCL1408_F3	3368	0.241005	0.722222	TIKKRFKVL	0.988531	HLA-B08:01
1zup_BLCL1408_F3	3371						-0.1	0.960797	SLRKYKEAL	0.956548	HLA-B08:01
1zup_BLCL1408_F3	3378											-1.5	0.75	EALHARHL	0.544281	HLA-B08:01
1zup_BLCL1408_F3	3379	-1.12546	0.652222	YLKIRHSSY	0.764826	HLA-B08:01	-0.2	0.895858	YLKIRHSSY	0.764826	HLA-B08:01
1zup_BLCL1408_F3	3380											7.9	0.77	ELKLQNRYL	0.859146	HLA-B08:01
1zup_BLCL1408_F3	3383	0.747364	0.82	EPYTKKEL	0.873965	HLA-B08:01	0.6	0.885479	EPYTKKEL	0.873965	HLA-B08:01
1zup_BLCL1408_F3	3385											1.3	0.79	LERRKLREL	0.663012	HLA-B08:01
1zup_BLCL1408_F3	3388											-0.3	0.74	LDRKKRLQL	0.798641	HLA-B08:01
1zup_BLCL1408_F3	3389											-4.5	0.87	ELmTKLGSL
1zup_BLCL1408_F3	3394	-0.408354	0.628889	KIKLKSSEL	0.955694	HLA-B08:01						-0.1	0.79	KLKLSSEKL	0.63826	HLA-B08:01
1zup_BLCL1408_F3	3401	-0.419644	0.843333	QLKHKLEQL	0.964123	HLA-B08:01	0	0.897613	QLKHKLEQL	0.964123	HLA-B08:01
1zup_BLCL1408_F3	3402						0.2	0.932794	EAHARIHL	0.880079	HLA-B08:01
1zup_BLCL1408_F3	3410											5.8	0.78	FLLPAEELFL	0.504776	HLA-C07:01
1zup_BLCL1408_F3	3412	-0.574866	0.90875	IPHIHKSL	0.885722	HLA-B08:01						-1	0.88	LPHLHKSL	0.881087	HLA-B08:01
1zup_BLCL1408_F3	3422											0.9	0.91	LFKRKEEEL	0.762448	HLA-B08:01
1zup_BLCL1408_F3	3425	0.564279	0.85125	IPHIHKSL	0.885722	HLA-B08:01	1	0.94585	IPHIHKSL	0.885722	HLA-B08:01
1zup_BLCL1408_F3	3426						-0.6	0.882698	MSHKRIML	0.755607	HLA-B08:01
1zup_BLCL1408_F3	3429											-1.3	0.8	NLRTHVRL	0.897348	HLA-B08:01
1zup_BLCL1408_F3	3433											-0.5	0.83	VLKVKLHEA	0.827858	HLA-B08:01
1zup_BLCL1408_F3	3434						0.7	0.975473	DMKRHRIQF	0.967056	HLA-B08:01
1zup_BLCL1408_F3	3440						-1.5	0.974827	RVHLRSATL	0.93195	HLA-B08:01
1zup_BLCL1408_F3	3465	-0.285185	0.823	HPPPHLKTQL	0.637261	HLA-B08:01	-1.3	0.983227	HPPPHLKTQL	0.637261	HLA-B08:01
1zup_BLCL1408_F3	3473											0.5	0.76	TLKKKFRVL	0.993491	HLA-B08:01
1zup_BLCL1408_F3	3475											-2.6	0.74	LSKERVKSL	0.969701	HLA-B08:01
1zup_BLCL1408_F3	3498											-1.1	0.72	LRKLRGSL	0.611706	HLA-B08:01
1zup_BLCL1408_F3	3517											9.6	0.7	YLNKRLVL	0.891226	HLA-B08:01
1zup_BLCL1408_F3	3535											1.6	0.71	LELRRKERL	0.573522	HLA-B08:01
1zup_BLCL1408_F3	3543											-2	0.7	DAYTKKEL	0.883432	HLA-B08:01
1zup_BLCL1408_F3	3550											1	0.75	HPKKALVL	0.906538	HLA-B08:01
1zup_BLCL1408_F3	3564											-5.8	0.7	HLYKLKSL	0.840162	HLA-B08:01
1zup_BLCL1408_F3	3566	-0.799032	0.754	HPPPHLKTQL	0.637261	HLA-B08:01
1zup_BLCL1408_F3	3594											1.3	0.71	ELRRKLREL	0.988261	HLA-B08:01
1zup_BLCL1408_F3	3620											0.9	0.75	HKRKKYEL	0.769312	HLA-B08:01
1zup_BLCL1408_F3	3624	-1.03296	0.611111	FNHKREIHL	0.791455	HLA-B08:01
1zup_BLCL1408_F3	3642											2.8	0.71	YLFLKKRR	0.508248	HLA-B08:01
1zup_BLCL1408_F3	3648											1	0.77	HPKKALVL	0.906538	HLA-B08:01
1zup_BLCL1408_F3	3658						-1	0.909735	YLHAKKYL	0.892073	HLA-B08:01
1zup_BLCL1408_F3	3662											-1.8	0.72	ELKKRFREL	0.99512	HLA-B08:01
1zup_BLCL1408_F3	3670						-0.2	0.960403	HRPSVRSVL	0.542275	HLA-B08:01
1zup_BLCL1408_F3	3677											0.3	0.7	HSHLNKPQL	0.669989	HLA-B08:01
1zup_BLCL1408_F3	3689						-0.3	0.973404	HSHPRVVEL	0.913292	HLA-B08:01
1zup_BLCL1408_F3	3735											0.5	0.7	YLFKLLLTL	0.577995	HLA-C07:01
1zup_BLCL1408_F3	3760											7.4	0.74	ELKLQAFRTL	0.632188	HLA-B08:01
1zup_BLCL1408_F3	3786											1.3	0.74	LERRKKAAQL	0.539908	HLA-B08:01
1zup_BLCL1408_F3	3815											0.1	0.7	HKKTGRVYL	0.57864	HLA-B08:01
1zup_BLCL1408_F3	3835											2.8	0.7	YLFKRKRL	0.925154	HLA-B08:01
1zup_BLCL1408_F3	3860											-1.8	0.76	ELKKRFREL	0.99512	HLA-B08:01
1zup_BLCL1408_F3	3866											5	0.76	VSLHFKQLSV	0.502708	HLA-B08:01
1zup_BLCL1408_F3	3882											1.3	0.79	LERRKLREL	0.663012	HLA-B08:01
1zup_BLCL1408_F3	3903											-0.2	0.7	TLKKFRKV	0.651203	HLA-B08:01
1zup_BLCL1408_F3	3909											0.9	0.83	HKRKKYEL	0.769312	HLA-B08:01
1zup_BLCL1408_F3	3928											3.1	0.72	TLKKRKFVL	0.993296	HLA-B08:01
1zup_BLCL1408_F3	3945	-0.00306238	0.88875	IIKDKHIL	0.891842	HLA-B08:01						-0.4	0.84	LLKDKHLL	0.919168	HLA-B08:01
1zup_BLCL1408_F3	3956											0.5	0.86	TLKKRFKVL	0.994493	HLA-B08:01
1zup_BLCL1408_F3	3959											1	0.7	TLKNHLRL	0.805469	HLA-B08:01
1zup_BLCL1408_F3	3969											5	0.76	VSLHKFQLSV	0.502587	HLA-B08:01
1zup_BLCL1408_F3	3976											5.6	0.78	ELLKWFKQL	0.666903	HLA-B08:01
1zup_BLCL1408_F3	3988											1.3	0.8	LERRKLREL	0.663012	HLA-B08:01
1zup_BLCL1408_F3	3999											-0.8	0.7	SFRKKYEL	0.801506	HLA-B08:01
1zup_BLCL1408_F3	4019						-1.3	0.910722	KRSNYITRL	0.511518	HLA-B08:01
1zup_BLCL1408_F3	4022											-1.8	0.75	DMKLVLHLDF
1zup_BLCL1408_F3	4030											0.1	0.7	HKKRKYEL	0.821954	HLA-B08:01
1zup_BLCL1408_F3	4033											-5.4	0.71	FLNHWVKHL	0.568958	HLA-B08:01
1zup_BLCL1408_F3	4044											-0.6	0.72	LAELLKYAL	0.554689	HLA-B08:01
1zup_BLCL1408_F3	4046											3.1	0.71	TLKKKFRVL	0.993491	HLA-B08:01
1zup_BLCL1408_F3	4049											-1.9	0.75	LLKRRLQL	0.9263	HLA-B08:01
1zup_BLCL1408_F3	4051											0.5	0.71	TLKKKFRVL	0.993491	HLA-B08:01
1zup_BLCL1408_F3	4057											6	0.7	MEKARDVKEL	0.514704	HLA-B08:01
1zup_BLCL1408_F3	4062	-0.163882	0.95125	TLKNHLRL	0.805469	HLA-B08:01	1	0.891065	TLKNHLRL	0.805469	HLA-B08:01
1zup_BLCL1408_F3	4063											0.5	0.77	LTKKKRFVL	0.929096	HLA-B08:01
1zup_BLCL1408_F3	4095											4.3	0.78	TFMKLYAL	0.564885	HLA-B08:01
1zup_BLCL1408_F3	4099											-1.9	0.8	LAELLKYAL	0.554689	HLA-B08:01
1zup_BLCL1408_F3	4113											-1	0.74	LLHKRVVL	0.883098	HLA-B08:01
1zup_BLCL1408_F3	4140											-0.6	0.76	LAELLKYAL	0.554689	HLA-B08:01
1zup_BLCL1408_F3	4145											9.8	0.72	TLKLLHVPVL	0.585937	HLA-B08:01
1zup_BLCL1408_F3	4153											0.1	0.72	HKKYKREL	0.663627	HLA-B08:01
1zup_BLCL1408_F3	4161	0.137742	0.87375	TLKNHLRL	0.805469	HLA-B08:01						1	0.86	TLKNHLRL	0.805469	HLA-B08:01
1zup_BLCL1408_F3	4169	1.24711	0.84375	KPYQKVGL	0.687253	HLA-B08:01						0.8	0.84	KPYQVKGL	0.528827	HLA-B08:01
1zup_BLCL1408_F3	4192						2.2	0.968159	SLRKLKASL	0.936537	HLA-B08:01
1zup_BLCL1408_F3	4198											-1.9	0.8	LAELLKYAL	0.554689	HLA-B08:01
1zup_BLCL1408_F3	4200											-1.9	0.74	AYKLTPPL	0.514325	HLA-B08:01
1zup_BLCL1408_F3	4202											-0.1	0.74	TLKKRKFVL	0.993296	HLA-B08:01
1zup_BLCL1408_F3	4213											0.9	0.7	HKKYKREL	0.663627	HLA-B08:01
1zup_BLCL1408_F3	4214											-1	0.75	LLHKRVVL	0.883098	HLA-B08:01
1zup_BLCL1408_F3	4233											0.5	0.74	PQQKRVLL	0.613279	HLA-B08:01
1zup_BLCL1408_F3	4243											-0.6	0.85	LALELKYAL	0.65425	HLA-B08:01
1zup_BLCL1408_F3	4247						-0.7	0.977404	HSLLKRVV	0.577443	HLA-B08:01
1zup_BLCL1408_F3	4251											0.5	0.73	TLKKFKRVL	0.96146	HLA-B08:01
1zup_BLCL1408_F3	4265	2.24911	0.91625	TLKNHLRL	0.805469	HLA-B08:01						1	0.88	TLKNHLRL	0.805469	HLA-B08:01
1zup_BLCL1408_F3	4267											6.1	0.76	QLKERWGFL
1zup_BLCL1408_F3	4278											0.3	0.73	HLKLRPSEL	0.996194	HLA-B08:01
1zup_BLCL1408_F3	4287											-1.6	0.73	KPEYGWR
1zup_BLCL1408_F3	4300											-1.9	0.73	LAELLKYAL	0.554689	HLA-B08:01
1zup_BLCL1408_F3	4302											0.3	0.77	LERKKLSQL	0.769439	HLA-B08:01
1zup_BLCL1408_F3	4303											4.3	0.73	TFMKLYAL	0.564885	HLA-B08:01
1zup_BLCL1408_F3	4309	1.00041	0.80875	KLPYHHVI	0.506215	HLA-C07:01
1zup_BLCL1408_F3	4319											-1.9	0.7	KNRVtLTPPL
1zup_BLCL1408_F3	4326	-0.279238	0.64125	LLHKRVVL	0.883098	HLA-B08:01
1zup_BLCL1408_F3	4333	0.210462	0.758889	YPHLKNHGL	0.950693	HLA-B08:01
1zup_BLCL1408_F3	4334	0.834063	0.885	VPHFHHEL	0.793026	HLA-B08:01
1zup_BLCL1408_F3	4344											-0.6	0.84	LALELKYAL	0.65425	HLA-B08:01
1zup_BLCL1408_F3	4348						1.1	0.934059	HLKPISREL	0.940454	HLA-B08:01
1zup_BLCL1408_F3	4352											0.5	0.74	TLKKKFRVL	0.993491	HLA-B08:01
1zup_BLCL1408_F3	4356	-1.65139	0.83	VPHFHHEL	0.793026	HLA-B08:01	1.2	0.890409	VPHFHHEL	0.793026	HLA-B08:01
1zup_BLCL1408_F3	4357											-1.1	0.78	YPHLRKAL	0.973295	HLA-B08:01
1zup_BLCL1408_F3	4382											5	0.72	VSLWRPTLSV	0.501144	HLA-C07:01
1zup_BLCL1408_F3	4386											0.3	0.76	HLKLPRSEL	0.92658	HLA-B08:01
1zup_BLCL1408_F3	4390											-1.6	0.7	KPEYGWR
1zup_BLCL1408_F3	4394	0.902009	0.70125	DPHVKTNL	0.782948	HLA-B08:01	1.2	0.926392	DPHVKTNL	0.782948	HLA-B08:01
1zup_BLCL1408_F3	4404						0.3	0.937401	ELRKKLSQL	0.994102	HLA-B08:01
1zup_BLCL1408_F3	4413											-3	0.8	KRAmESERVL
1zup_BLCL1408_F3	4425											5.3	0.76	YLLWVELVR	0.500385	HLA-A01:01
1zup_BLCL1408_F3	4427	-0.64622	0.826667	YPHLKNHGL	0.950693	HLA-B08:01	0.8	0.972319	YPHLKNHGL	0.950693	HLA-B08:01
1zup_BLCL1408_F3	4431	-0.0676816	0.842222	YPHLKNHGL	0.950693	HLA-B08:01
1zup_BLCL1408_F3	4432	1.12948	0.86625	VPHFHHEL	0.793026	HLA-B08:01
1zup_BLCL1408_F3	4438						0.4	0.88258	HLKKTVTML	0.919575	HLA-B08:01
1zup_BLCL1408_F3	4439	11.2075	0.705	IIHLAGKLL
1zup_BLCL1408_F3	4441											-3	0.77	KRmAESERVL
1zup_BLCL1408_F3	4445											-0.6	0.77	LAELLKYAL	0.554689	HLA-B08:01
1zup_BLCL1408_F3	4449											0.5	0.78	TLKKRKFVL	0.993296	HLA-B08:01
1zup_BLCL1408_F3	4453											6	0.74	NGKLmSLTRL
1zup_BLCL1408_F3	4506											9.8	0.75	TLKLLVHPVL	0.535267	HLA-B08:01
1zup_BLCL1408_F3	4511						0.1	0.96561	TLRHKLTVM	0.956701	HLA-B08:01
1zup_BLCL1408_F3	4515	0.313092	0.92875	LPHIHNHL	0.774802	HLA-B08:01						-0.5	0.71	LPHLHNHL	0.769923	HLA-B08:01
1zup_BLCL1408_F3	4524											-0.8	0.79	YLKNRELVR	0.522618	HLA-B08:01
1zup_BLCL1408_F3	4531	-0.0676816	0.808889	YPHLKNHGL	0.950693	HLA-B08:01
1zup_BLCL1408_F3	4546											-0.6	0.85	LALELKYAL	0.65425	HLA-B08:01
1zup_BLCL1408_F3	4550						-0.3	0.950312	FTKRKFGL	0.693291	HLA-B08:01
1zup_BLCL1408_F3	4559	0.124677	0.69	PHHRVIEV	0.518408	HLA-B08:01	0.1	0.972152	PHHRVIEV	0.518408	HLA-B08:01
1zup_BLCL1408_F3	4564											-0.2	0.82	NLKLKERL	0.923479	HLA-B08:01
1zup_BLCL1408_F3	4571											-0.2	0.79	LPHHKHTL	0.925919	HLA-B08:01
1zup_BLCL1408_F3	4594											-1.1	0.73	ALLPHKKAL	0.881895	HLA-B08:01
1zup_BLCL1408_F3	4597						0.1	0.949612	FPHKRLQQL	0.994574	HLA-B08:01
1zup_BLCL1408_F3	4598						0.8	0.9155	FTRLRHEF	0.714735	HLA-B08:01
1zup_BLCL1408_F3	4609	-0.27328	0.83625	FVIKKHEL	0.894309	HLA-B08:01						-0.6	0.88	FVLKKHEL	0.893944	HLA-B08:01
1zup_BLCL1408_F3	4610	0.835624	0.7925	FVIKKHEL	0.894309	HLA-B08:01
1zup_BLCL1408_F3	4615	0.421048	0.756667	LPHHRVIEV	0.841788	HLA-B08:01
1zup_BLCL1408_F3	4616											0.8	0.7	HFSTKHLL	0.609919	HLA-B08:01
1zup_BLCL1408_F3	4624						-1.1	0.925354	NGATRKLAL	0.954427	HLA-B08:01
1zup_BLCL1408_F3	4640											9.8	0.79	TLKLVLHPVL	0.530083	HLA-B08:01
1zup_BLCL1408_F3	4645	1.62508	0.596667	LPHHRVIEV	0.841788	HLA-B08:01
1zup_BLCL1408_F3	4646											-0.6	0.83	LALELKYAL	0.65425	HLA-B08:01
1zup_BLCL1408_F3	4651											9.8	0.74	TLKVLLHPVL
1zup_BLCL1408_F3	4652											-0.1	0.8	TLKKKFRVL	0.993491	HLA-B08:01
1zup_BLCL1408_F3	4661											1.3	0.74	LHKPLLESR	0.501426	HLA-B08:01
1zup_BLCL1408_F3	4666	-1.5843	0.773636	HSEDYSKVPKY	0.901151	HLA-A01:01	-0.4	0.985793	HSEDYSKVPKY	0.901151	HLA-A01:01
1zup_BLCL1408_F3	4687											-0.1	0.78	LPKAKLGVTL	0.727204	HLA-B08:01
1zup_BLCL1408_F3	4689	0.432394	0.957778	KLKAKYPSL	0.955989	HLA-B08:01	0.4	0.975078	KLKAKYPSL	0.955989	HLA-B08:01
1zup_BLCL1408_F3	4697											6.3	0.73	LLFTHHLL	0.576279	HLA-B08:01
1zup_BLCL1408_F3	4702						0.2	0.977109	KSDSGKPYYY	0.970711	HLA-A01:01
1zup_BLCL1408_F3	4706	-1.14398	0.785	RSFFHQHY	0.528783	HLA-A01:01	-1.9	0.958206	RSFFHQHY	0.528783	HLA-A01:01
1zup_BLCL1408_F3	4711	0.835624	0.795	FVIKKHEL	0.894309	HLA-B08:01						1.5	0.85	FVLKKHEL	0.893944	HLA-B08:01
1zup_BLCL1408_F3	4712	0.318662	0.905	FVIKKHEL	0.894309	HLA-B08:01	-0.6	0.885822	FVIKKHEL	0.894309	HLA-B08:01
1zup_BLCL1408_F3	4723	0.421048	0.715556	LPHHRVIEV	0.841788	HLA-B08:01	0.2	0.977584	LPHHRVIEV	0.841788	HLA-B08:01
1zup_BLCL1408_F3	4736	0.189253	0.792222	HTDILKEKY	0.99596	HLA-A01:01
1zup_BLCL1408_F3	4741											-3.1	0.72	TTEKEVSEKETTHY	0.900252	HLA-A01:01
1zup_BLCL1408_F3	4755											9.8	0.71	TLKVLLHPVL
1zup_BLCL1408_F3	4756											2.8	0.7	LPHHRVELV
1zup_BLCL1408_F3	4759											9.8	0.78	TLKLVLHPVL	0.530083	HLA-B08:01
1zup_BLCL1408_F3	4766	0.0644446	0.612222	TIKKRFKVL	0.988531	HLA-B08:01						-0.1	0.8	TLKKRKFVL	0.993296	HLA-B08:01
1zup_BLCL1408_F3	4776	0.147955	0.847778	EIKTKIKEL	0.986054	HLA-B08:01	0.3	0.950163	EIKTKIKEL	0.986054	HLA-B08:01
1zup_BLCL1408_F3	4791											-3.6	0.76	LAKLPKRTL
1zup_BLCL1408_F3	4805						-0.2	0.934715	ELRKKVEVL	0.993555	HLA-B08:01
1zup_BLCL1408_F3	4806						0.6	0.945633	YLDEADRDKERY	0.956888	HLA-A01:01
1zup_BLCL1408_F3	4807											6.3	0.8	LLFTHHLL	0.576279	HLA-B08:01
1zup_BLCL1408_F3	4810	0.126701	0.818	KSDSGKPYYY	0.970711	HLA-A01:01
1zup_BLCL1408_F3	4813	-2.48144	0.79625	RSFFHQHY	0.528783	HLA-A01:01
1zup_BLCL1408_F3	4819	0.243682	0.71875	FVIKKHEL	0.894309	HLA-B08:01						1.5	0.85	FVLKKHEL	0.893944	HLA-B08:01
1zup_BLCL1408_F3	4836						-0.8	0.9131	ELIRRAHEF	0.882972	HLA-B08:01
1zup_BLCL1408_F3	4838	-1.11895	0.868889	HTDILKEKY	0.99596	HLA-A01:01
1zup_BLCL1408_F3	4852	0.623296	0.944444	KLKAKYPSL	0.955989	HLA-B08:01
1zup_BLCL1408_F3	4854											-0.1	0.82	TLKKRFKVL	0.994493	HLA-B08:01
1zup_BLCL1408_F3	4863											-0.6	0.77	LAELLKYAL	0.554689	HLA-B08:01
1zup_BLCL1408_F3	4876	0.00272066	0.841111	FNKRKPLSL	0.977595	HLA-B08:01	0.9	0.974978	FNKRKPLSL	0.977595	HLA-B08:01
1zup_BLCL1408_F3	4877						-0.7	0.966088	RAKFKFPG	0.49784	HLA-A01:01
1zup_BLCL1408_F3	4878											0.3	0.77	ELKQRFRQL	0.994138	HLA-B08:01
1zup_BLCL1408_F3	4882											-0.1	0.75	TLKKKRFVL	0.990726	HLA-B08:01
1zup_BLCL1408_F3	4920	-0.0522881	0.83375	FVIKKHEL	0.894309	HLA-B08:01						1.5	0.77	FVLKGHLSL	0.674967	HLA-B08:01
1zup_BLCL1408_F3	4935						-0.9	0.955931	HVRTKLDEL	0.895009	HLA-B08:01
1zup_BLCL1408_F3	4943											5.9	0.73	LEPTRWKYL	0.531729	HLA-B08:01
1zup_BLCL1408_F3	4951											0.6	0.73	KLKAKYPSL	0.955989	HLA-B08:01
1zup_BLCL1408_F3	4954											9.7	0.71	LnNYRLHSL
1zup_BLCL1408_F3	4977											0.3	0.81	ELKQRFQRL	0.994507	HLA-B08:01
1zup_BLCL1408_F3	4986						0.3	0.989198	DSDRYRDGYRDGY	0.617013	HLA-A01:01
1zup_BLCL1408_F3	5031											2.5	0.74	LAERRLRAL	0.806923	HLA-B08:01
1zup_BLCL1408_F3	5041											-0.5	0.9	LHLLKRSL	0.577973	HLA-B08:01
1zup_BLCL1408_F3	5042	-0.790396	0.799091	FLKVKGEKSGL	0.603786	HLA-B08:01
1zup_BLCL1408_F3	5045	-0.287012	0.801111	TRVKAVRIL	0.509771	HLA-B08:01
1zup_BLCL1408_F3	5087											9.6	0.72	ELKLSHHLQL	0.755548	HLA-B08:01
1zup_BLCL1408_F3	5093						1.8	0.93047	YLHSKLAHI	0.802983	HLA-B08:01
1zup_BLCL1408_F3	5097	-0.346248	0.7525	LPHLRNKL	0.891865	HLA-B08:01						-1.1	0.71	LPHLRNKL	0.891865	HLA-B08:01
1zup_BLCL1408_F3	5100											-1.8	0.75	TLKKKRFVL	0.990726	HLA-B08:01
1zup_BLCL1408_F3	5118	-0.683584	0.805	RPKIKVSL	0.961583	HLA-B08:01	-0.6	0.936898	RPKIKVSL	0.961583	HLA-B08:01
1zup_BLCL1408_F3	5134											0.1	0.8	LAEVKLLQAL	0.50156	HLA-A01:01
1zup_BLCL1408_F3	5143						-0.5	0.880088	HLLIKRSL	0.955604	HLA-B08:01
1zup_BLCL1408_F3	5156						-0.2	0.940869	TRVKAVRIL	0.509771	HLA-B08:01
1zup_BLCL1408_F3	5175											-2.7	0.74	LAELLKYAL	0.554689	HLA-B08:01
1zup_BLCL1408_F3	5178						-1.6	0.924074	ELKEKLRSI	0.981993	HLA-B08:01
1zup_BLCL1408_F3	5179											3.5	0.79	LTKYHKLQL	0.789782	HLA-B08:01
1zup_BLCL1408_F3	5195											-3.2	0.73	YLFFKQAVPL	0.517733	HLA-B08:01
1zup_BLCL1408_F3	5204											8	0.72	TLKLVLHPVL	0.530083	HLA-B08:01
1zup_BLCL1408_F3	5217	-1.15535	0.842222	ETEKDFSRY	0.987602	HLA-A01:01
1zup_BLCL1408_F3	5222											-0.7	0.77	LLVKEKRL
1zup_BLCL1408_F3	5223											-0.1	0.78	LARRRLEAL	0.955232	HLA-B08:01
1zup_BLCL1408_F3	5235											8.4	0.77	ELLKRLDQL
1zup_BLCL1408_F3	5247	-1.73782	0.857778	HLDAQRLHY	0.986102	HLA-A01:01	-1.5	0.975669	HLDAQRLHY	0.986102	HLA-A01:01
1zup_BLCL1408_F3	5252											-0.5	0.86	LHLLKRSL	0.577973	HLA-B08:01
1zup_BLCL1408_F3	5283						-1.5	0.9109	KLFEKKYSV	0.873784	HLA-B08:01
1zup_BLCL1408_F3	5299	-0.0310744	0.761111	LEKYLQRQL			-0.3	0.964528	ELKRKFEQL	0.992205	HLA-B08:01
1zup_BLCL1408_F3	5309											8.4	0.73	TLKLHVLPVL	0.59302	HLA-B08:01
1zup_BLCL1408_F3	5310											-0.1	0.73	VFRKKVLTL	0.935434	HLA-B08:01
1zup_BLCL1408_F3	5313						1	0.907542	HLLLKQGKL	0.852065	HLA-B08:01
1zup_BLCL1408_F3	5324											7.2	0.73	LLFVWRVEL
1zup_BLCL1408_F3	5339						1.1	0.960005	HIKDSFHSL	0.931545	HLA-B08:01
1zup_BLCL1408_F3	5342											-5.3	0.79	ELLKRAWVL	0.948503	HLA-B08:01
1zup_BLCL1408_F3	5343	0.232204	0.835	YRLLKSKL	0.567205	HLA-B08:01						0.7	0.73	LRYLKSLK	0.500066	HLA-A01:01
1zup_BLCL1408_F3	5354											-1.5	0.72	VLQPAKFFQL	0.526244	HLA-B08:01
1zup_BLCL1408_F3	5356											-0.5	0.78	LHLLKRSL	0.577973	HLA-B08:01
1zup_BLCL1408_F3	5360						0.3	0.978784	HNHYTQKSLSLSPG	0.350238	HLA-A01:01
1zup_BLCL1408_F3	5415											8.3	0.76	TLKLLVHPVL	0.535267	HLA-B08:01
1zup_BLCL1408_F3	5417						-1	0.98249	HSHIRGLGL	0.706211	HLA-B08:01
1zup_BLCL1408_F3	5430											0.9	0.88	LSRKQLASL	0.736139	HLA-B08:01
1zup_BLCL1408_F3	5440											0	0.85	EALPKQSV	0.697722	HLA-B08:01
1zup_BLCL1408_F3	5448											0	0.77	FPVGRVHLR	0.509963	HLA-B08:01
1zup_BLCL1408_F3	5449											5.4	0.71	MPAALRLDQL	0.545645	HLA-B08:01
1zup_BLCL1408_F3	5470											-1.2	0.72	PVRGVHLR	0.498687	HLA-A01:01
1zup_BLCL1408_F3	5472											-1.4	0.84	SPYRL
1zup_BLCL1408_F3	5499	-0.334689	0.887778	ELHKKLLSV	0.967426	HLA-B08:01	-0.1	0.958992	ELHKKLLSV	0.967426	HLA-B08:01
1zup_BLCL1408_F3	5519											-1.2	0.73	TLKKFKRVL	0.96146	HLA-B08:01
1zup_BLCL1408_F3	5522	0.264914	0.64875	YLIKHKML	0.802242	HLA-B08:01						0.2	0.85	YLLKHKML	0.746246	HLA-B08:01
1zup_BLCL1408_F3	5533											0.9	0.73	LSRKQLASL	0.736139	HLA-B08:01
1zup_BLCL1408_F3	5534											0.1	0.73	LAVQKLLEAL	0.500151	HLA-A01:01
1zup_BLCL1408_F3	5540						0.9	0.915753	SRSGGGGGGGLGSGGSIRSSYS	0.00667	HLA-A01:01
1zup_BLCL1408_F3	5547											-4.8	0.7	YALKHLLSF	0.701815	HLA-B08:01
1zup_BLCL1408_F3	5553											0	0.72	FPVGRVHLR	0.509963	HLA-B08:01
1zup_BLCL1408_F3	5554											8.4	0.77	ELLKREQVL
1zup_BLCL1408_F3	5562						-1.4	0.889418	YAAQQHPQAAASY	0.539923	HLA-A01:01
1zup_BLCL1408_F3	5584						0.4	0.923158	SLRSKVTAI	0.983886	HLA-B08:01
1zup_BLCL1408_F3	5585						0.6	0.923158	mSEPHYGHAGTVY
1zup_BLCL1408_F3	5608											1.5	0.76	EFKTKYKL	0.786929	HLA-B08:01
1zup_BLCL1408_F3	5613											-1.7	0.75	TAVTAKPR	0.494889	HLA-A01:01
1zup_BLCL1408_F3	5628											8.5	0.73	TLKLLHVPVL	0.585937	HLA-B08:01
1zup_BLCL1408_F3	5635											-0.7	0.74	KPRPLLK
1zup_BLCL1408_F3	5638											2.5	0.72	LARRRLEAL	0.955232	HLA-B08:01
1zup_BLCL1408_F3	5639											-1	0.75	VLKPPRLK	0.504312	HLA-B08:01
1zup_BLCL1408_F3	5643	-0.438091	0.696667	HTEERLLRY	0.995632	HLA-A01:01	-0.5	0.962969	HTEERLLRY	0.995632	HLA-A01:01
1zup_BLCL1408_F3	5648											0.9	0.76	TVRKQLASL	0.907956	HLA-B08:01
1zup_BLCL1408_F3	5655											0.7	0.72	SLLmEKCLSL
1zup_BLCL1408_F3	5658	0.344055	0.936	mMDPNSTQRY
1zup_BLCL1408_F3	5666	-1.32213	0.685556	ILNDKRHIL	0.935028	HLA-B08:01						-0.9	0.78	LLNDKHRLL	0.855723	HLA-B08:01
1zup_BLCL1408_F3	5668	0.440566	0.947778	ESEEYQERY	0.979458	HLA-A01:01						0.3	0.87	TDqEYQERY
1zup_BLCL1408_F3	5695	0.0582091	0.955	DTAVRHVL	0.737198	HLA-B08:01	-0.3	0.917338	DTAVRHVL	0.737198	HLA-B08:01
1zup_BLCL1408_F3	5698											8.9	0.76	LPKLCHKKT
1zup_BLCL1408_F3	5714						0.1	0.9719	SLKNRIESV	0.961558	HLA-B08:01
1zup_BLCL1408_F3	5719						0.2	0.90558	EFKTKYKI	0.466622	HLA-B08:01
1zup_BLCL1408_F3	5739											7.7	0.86	LSmERTSL
1zup_BLCL1408_F3	5748											0.6	0.74	MPSEKVVm
1zup_BLCL1408_F3	5751											6	0.73	LSFEVFPNSL	0.503964	HLA-A01:01
1zup_BLCL1408_F3	5752						-1.1	0.879728	qIRKKMMEI
1zup_BLCL1408_F3	5754						-1.2	0.92756	RVDGRMLHY	0.960951	HLA-A01:01
1zup_BLCL1408_F3	5764											6.6	0.78	SLLSFWAESL	0.501171	HLA-B08:01
1zup_BLCL1408_F3	5765	-0.45053	0.949	mMDPNSTQRY
1zup_BLCL1408_F3	5778						0.7	0.943865	RPSVRSVL	0.805148	HLA-B08:01
1zup_BLCL1408_F3	5789						0.3	0.972975	VTDRSDARLQY	0.992559	HLA-A01:01
1zup_BLCL1408_F3	5803						-1.1	0.945361	ELREHIEKL	0.960192	HLA-B08:01
1zup_BLCL1408_F3	5806	0.401139	0.942222	DLNEKARAL	0.965289	HLA-B08:01	0.9	0.955887	DLNEKARAL	0.965289	HLA-B08:01
1zup_BLCL1408_F3	5807						-1	0.902899	HLLQHHII	0.495164	HLA-A01:01
1zup_BLCL1408_F3	5814	-0.255447	0.847778	DLNEKARAL	0.965289	HLA-B08:01
1zup_BLCL1408_F3	5836						-0.2	0.879487	ILKEKLRQL	0.985259	HLA-B08:01
1zup_BLCL1408_F3	5840											-8.4	0.82	YTDHQSmYYY
1zup_BLCL1408_F3	5846	0.038615	0.69625	YLKEREEF	0.866672	HLA-B08:01
1zup_BLCL1408_F3	5849						0.8	0.904821	SSFRQDHPSSmGVY
1zup_BLCL1408_F3	5856	0.241247	0.73	NIKQKMQEL	0.991727	HLA-B08:01	-0.3	0.905674	NIKQKMQEL	0.991727	HLA-B08:01
1zup_BLCL1408_F3	5868	-0.0322408	0.676667	NIKQKmQEL								0.9	0.71	QVKQKmQEL
1zup_BLCL1408_F3	5878	0.0262213	0.931	mMDPNSTQRY
1zup_BLCL1408_F3	5882											0.4	0.7	HLRNRELL	0.859731	HLA-B08:01
1zup_BLCL1408_F3	5889											-2.4	0.72	LACLKLPAAAL	0.499863	HLA-A01:01
1zup_BLCL1408_F3	5891											-0.4	0.81	KPELKYERL	0.681474	HLA-B08:01
1zup_BLCL1408_F3	5899	-0.466824	0.602727	YTDHQNSSSYY	0.998979	HLA-A01:01	-0.7	0.980899	YTDHQNSSSYY	0.998979	HLA-A01:01
1zup_BLCL1408_F3	5900	-0.108309	0.85	RSEEGRLYY	0.974507	HLA-A01:01	0.4	0.962334	RSEEGRLYY	0.974507	HLA-A01:01
1zup_BLCL1408_F3	5915	-0.211653	0.682	HSDIFPARHY	0.982894	HLA-A01:01	1.8	0.962221	HSDIFPARHY	0.982894	HLA-A01:01
1zup_BLCL1408_F3	5938	0.56393	0.914444	EPKLKYERL	0.958854	HLA-B08:01	-1	0.922618	EPKLKYERL	0.958854	HLA-B08:01
1zup_BLCL1408_F3	5944											-1.8	0.9	TSERTVLYR	0.541228	HLA-A01:01
1zup_BLCL1408_F3	5945	0.141765	0.582857	SRSGGGGGGGLGSGGSIRSSY	0.024126	HLA-A01:01
1zup_BLCL1408_F3	5982						0.5	0.944089	FPREPRPKL	0.868479	HLA-B08:01
1zup_BLCL1408_F3	5988	-0.291613	0.957	mMDPNSTQRY
1zup_BLCL1408_F3	5997	-0.181172	0.807778	EPKLKYERL	0.958854	HLA-B08:01
1zup_BLCL1408_F3	6000											-10.1	0.72	NLKEKKKNL	0.990254	HLA-B08:01
1zup_BLCL1408_F3	6002											4	0.78	TEYGnmADyAF
1zup_BLCL1408_F3	6011											1.2	0.72	DLLKRLRA	0.532849	HLA-B08:01
1zup_BLCL1408_F3	6019											1.4	0.73	CLKVPLLHVL	0.509131	HLA-B08:01
1zup_BLCL1408_F3	6021	0.0788516	0.898889	DVKAKLHEL	0.987863	HLA-B08:01	0.9	0.943358	DVKAKLHEL	0.987863	HLA-B08:01
1zup_BLCL1408_F3	6022											-1.8	0.74	YLVLSDYVL	0.513428	HLA-C07:01
1zup_BLCL1408_F3	6025	0.471187	0.913333	FSEHGSLKY	0.997471	HLA-A01:01	-0.5	0.950905	FSEHGSLKY	0.997471	HLA-A01:01
1zup_BLCL1408_F3	6026						0.1	0.967156	YTDRALRASY	0.99257	HLA-A01:01
1zup_BLCL1408_F3	6031	-0.211653	0.76	HSDIFPARHY	0.982894	HLA-A01:01
1zup_BLCL1408_F3	6035											0.4	0.74	LnLRKARL
1zup_BLCL1408_F3	6045	-0.297406	0.645455	LSEVNRTGTQY	0.931066	HLA-A01:01	0.3	0.979919	LSEVNRTGTQY	0.931066	HLA-A01:01
1zup_BLCL1408_F3	6053	-0.456758	0.902222	EPKLKYERL	0.958854	HLA-B08:01
1zup_BLCL1408_F3	6094						-0.9	0.895441	YLKDRKVFV	0.926546	HLA-B08:01
1zup_BLCL1408_F3	6096											-0.1	0.79	DVKAKLHEL	0.987863	HLA-B08:01
1zup_BLCL1408_F3	6101											0	0.82	NLKEKLKEL	0.992631	HLA-B08:01
1zup_BLCL1408_F3	6103											1	0.95	LNKEKLKEL	0.902183	HLA-B08:01
1zup_BLCL1408_F3	6105						-0.5	0.891933	VSEGDGGRLKPESY	0.840787	HLA-A01:01
1zup_BLCL1408_F3	6106	-0.609446	0.936	MmDPNSTQRY
1zup_BLCL1408_F3	6112	-0.496047	0.571	YTDRALRASY	0.99257	HLA-A01:01
1zup_BLCL1408_F3	6123											1.2	0.74	DLLKRLAR	0.483703	HLA-B08:01
1zup_BLCL1408_F3	6146											0.4	0.79	LnLRKLAR
1zup_BLCL1408_F3	6190	0.390092	0.95	ETYGDmADCCEK
1zup_BLCL1408_F3	6200											0.3	0.7	LTRHKAHTAL	0.555316	HLA-B08:01
1zup_BLCL1408_F3	6207	1.0052	0.643333	LTDRGVmSY
1zup_BLCL1408_F3	6211	-0.325653	0.892222	NLKEKIKEL	0.993149	HLA-B08:01
1zup_BLCL1408_F3	6212						-0.5	0.967678	YTDSEPRATY	0.998117	HLA-A01:01
1zup_BLCL1408_F3	6214											-3.3	0.7	LYHLETLKY	0.529117	HLA-A01:01
1zup_BLCL1408_F3	6215	-0.45053	0.924	mMDPNSTQRY
1zup_BLCL1408_F3	6224	-0.37426	0.643	mmDPNSTQRY
1zup_BLCL1408_F3	6233	-0.173765	0.7	DLLTRHKL	0.916381	HLA-B08:01
1zup_BLCL1408_F3	6235											1.2	0.81	DLLKRARL	0.875469	HLA-B08:01
1zup_BLCL1408_F3	6236											4	0.83	ELFNMKYQL	0.726165	HLA-B08:01
1zup_BLCL1408_F3	6242						0	0.929137	DLLTRHKL	0.916381	HLA-B08:01
1zup_BLCL1408_F3	6244											0.1	0.82	HVVGRTYSV
1zup_BLCL1408_F3	6247											1	0.96	LNKEKLKEL	0.902183	HLA-B08:01
1zup_BLCL1408_F3	6253						-0.1	0.96656	ETEHEPTKmFY
1zup_BLCL1408_F3	6258						0.6	0.985477	FKDLGEEHFK	0.504676	HLA-A01:01
1zup_BLCL1408_F3	6278						0.4	0.907449	VTDRSDARLqY
1zup_BLCL1408_F3	6292	0.40075	0.786	YSYAGGRGSY	0.790083	HLA-A01:01						0.5	0.76	YSYAGNRSY	0.768932	HLA-A01:01
1zup_BLCL1408_F3	6296											2.8	0.74	EEDDLWEHFK	0.507502	HLA-A01:01
1zup_BLCL1408_F3	6301	-1.28106	0.911818	FTDTSYEEKRY	0.991008	HLA-A01:01	-0.4	0.968539	FTDTSYEEKRY	0.991008	HLA-A01:01
1zup_BLCL1408_F3	6321											0	0.8	NLKEKLEKL	0.98557	HLA-B08:01
1zup_BLCL1408_F3	6323	0.979723	0.95	mMDPNSTQRY
1zup_BLCL1408_F3	6325											0.5	0.78	YVNEKRYPL
1zup_BLCL1408_F3	6326											0.3	0.85	HTTLRSVL	0.629844	HLA-B08:01
1zup_BLCL1408_F3	6335	0.17223	0.9275	YTDVSTRY	0.988216	HLA-A01:01						0.2	0.92	YTDVSTRY	0.988216	HLA-A01:01
1zup_BLCL1408_F3	6337											3.7	0.74	YSDERYQtTC
1zup_BLCL1408_F3	6345	-0.776417	0.8125	DLLTRHKL	0.916381	HLA-B08:01
1zup_BLCL1408_F3	6347	-0.297725	0.9125	HTDAGTGRPYYY	0.99286	HLA-A01:01	0	0.983361	HTDAGTGRPYYY	0.99286	HLA-A01:01
1zup_BLCL1408_F3	6355	0.101374	0.935556	NLKEKIKEL	0.993149	HLA-B08:01
1zup_BLCL1408_F3	6358	0.118213	0.698462	KADSLVEGTSSRY	0.794167	HLA-A01:01	-0.3	0.98624	KADSLVEGTSSRY	0.794167	HLA-A01:01
1zup_BLCL1408_F3	6359						-0.9	0.95056	LTEENTKLRY	0.993394	HLA-A01:01
1zup_BLCL1408_F3	6361	-1.78656	0.797	mmDPNSTQRY
1zup_BLCL1408_F3	6370											-0.8	0.73	TLKKKRFVL	0.990726	HLA-B08:01
1zup_BLCL1408_F3	6371	0.495534	0.865	HISVKEEL	0.620772	HLA-B08:01						0	0.81	HLSVKEEL	0.657623	HLA-B08:01
1zup_BLCL1408_F3	6391	0.71384	0.885556	VSDFSHPHY	0.989642	HLA-A01:01	0.2	0.896997	VSDFSHPHY	0.989642	HLA-A01:01
1zup_BLCL1408_F3	6395											-3.6	0.73	TVHVWLSTL	0.541232	HLA-B08:01
1zup_BLCL1408_F3	6399	0.40075	0.665	YSYAGGRGSY	0.790083	HLA-A01:01
1zup_BLCL1408_F3	6404	-1.43415	0.786667	YTDDAGRPQTAY	0.997632	HLA-A01:01	-0.7	0.988757	YTDDAGRPQTAY	0.997632	HLA-A01:01
1zup_BLCL1408_F3	6417											-6.2	0.79	YSEEEKETSY	0.982589	HLA-A01:01
1zup_BLCL1408_F3	6439						-0.3	0.942788	HANYKVTL	0.829644	HLA-B08:01
1zup_BLCL1408_F3	6440						0.5	0.957276	HYTQKSLSL	0.663309	HLA-B08:01
1zup_BLCL1408_F3	6446						0.5	0.880088	ISRPKGVAL	0.897032	HLA-B08:01
1zup_BLCL1408_F3	6447	-3.55212	0.594167	YLDEAEREKQQY	0.97888	HLA-A01:01
1zup_BLCL1408_F3	6454	-1.15449	0.861667	HTDAGTGRPYYY	0.99286	HLA-A01:01
1zup_BLCL1408_F3	6459	1.69683	0.582727	DLLPKEKRHVL	0.850209	HLA-B08:01
1zup_BLCL1408_F3	6464											0.4	0.73	LLPRRRPL	0.69892	HLA-B08:01
1zup_BLCL1408_F3	6465	0.819067	0.92	NLKEKIKEL	0.993149	HLA-B08:01
1zup_BLCL1408_F3	6470											-0.6	0.85	ELLKKHLL	0.913733	HLA-B08:01
1zup_BLCL1408_F3	6471											-0.5	0.74	TLREKAGLAV	0.573324	HLA-B08:01
1zup_BLCL1408_F3	6472											3.1	0.73	HLKEEVSGL	0.763885	HLA-B08:01
1zup_BLCL1408_F3	6482						-0.7	0.960284	YLDEAEREKQQY	0.97888	HLA-A01:01
1zup_BLCL1408_F3	6489						-1.6	0.938946	RFKDRIVSm
1zup_BLCL1408_F3	6491											-0.7	0.79	YLGCnNQDTLSSK
1zup_BLCL1408_F3	6500	0.0694269	0.832	ARYSGSYNDY	0.507273	HLA-A01:01	-0.1	0.972731	ARYSGSYNDY	0.507273	HLA-A01:01
1zup_BLCL1408_F3	6503	0.224426	0.85125	ELIKKHLL	0.926215	HLA-B08:01						0	0.97	LELKKHLL	0.546465	HLA-B08:01
1zup_BLCL1408_F3	6523						-0.3	0.976506	YTDHqNSSSYY
1zup_BLCL1408_F3	6524											7.7	0.78	YSEqETCLQY
1zup_BLCL1408_F3	6530	1.00638	0.964444	YSEAVASHY	0.995613	HLA-A01:01	0.5	0.934323	YSEAVASHY	0.995613	HLA-A01:01
1zup_BLCL1408_F3	6535						-1.4	0.92223	HIRDKLAAI	0.927029	HLA-B08:01
1zup_BLCL1408_F3	6541											1.2	0.74	FLDHMTVHPY	0.956813	HLA-A01:01
1zup_BLCL1408_F3	6551	-0.830928	0.87125	NIKYHEEF	0.543964	HLA-B08:01
1zup_BLCL1408_F3	6556	0.723405	0.760833	YLDEAEREKQQY	0.97888	HLA-A01:01
1zup_BLCL1408_F3	6566	0.138744	0.833636	DLLPKEKRHVL	0.850209	HLA-B08:01						-0.5	0.7	DLLPKERKHVL	0.855895	HLA-B08:01
1zup_BLCL1408_F3	6569											-0.3	0.85	KPYVRVTm
1zup_BLCL1408_F3	6575	0.837538	0.87125	DLIKKVHV	0.664362	HLA-B08:01						1.4	0.83	DLLKKVHV	0.623776	HLA-B08:01
1zup_BLCL1408_F3	6577											-0.6	0.8	ELLKKLHL	0.882694	HLA-B08:01
1zup_BLCL1408_F3	6579											4.5	0.77	ELKKVAQEL	0.940037	HLA-B08:01
1zup_BLCL1408_F3	6588						1.1	0.925279	YIDENQDRY	0.995523	HLA-A01:01
1zup_BLCL1408_F3	6599											-0.7	0.82	YLGCDNQDTLSSK	0.500567	HLA-A01:01
1zup_BLCL1408_F3	6602						1.1	0.905485	KPYVRVTM	0.821003	HLA-B08:01
1zup_BLCL1408_F3	6603						-0.4	0.986963	LSEVNRTGTqY
1zup_BLCL1408_F3	6616	-6.78363	0.778	HNPEEQLSSK	0.50273	HLA-A01:01						-9.5	0.89	FENQDTLSSK	0.503169	HLA-A01:01
1zup_BLCL1408_F3	6617	0.78964	0.758889	YAYEKPHVV	0.881042	HLA-B08:01	-1.3	0.965748	YAYEKPHVV	0.881042	HLA-B08:01
1zup_BLCL1408_F3	6625	0.757132	0.731111	VRRVmAEAL			-0.5	0.906332	ERIMKAqAL
1zup_BLCL1408_F3	6632											4.8	0.81	YFLWLYSF	0.494367	HLA-A01:01
1zup_BLCL1408_F3	6636											-1.7	0.75	ALLLEVLSL	0.551008	HLA-B08:01
1zup_BLCL1408_F3	6637											0.5	0.78	TVRLKSQEL	0.985079	HLA-B08:01
1zup_BLCL1408_F3	6654						0.9	0.941808	YPRPRDTSF	0.928349	HLA-B08:01
1zup_BLCL1408_F3	6655	0.317167	0.641111	mLDHQPPQY			0.4	0.895126	mLDHQPPQY
1zup_BLCL1408_F3	6670	-0.154118	0.687778	SMKVKYQSL	0.994167	HLA-B08:01	0.5	0.974216	SMKVKYQSL	0.994167	HLA-B08:01
1zup_BLCL1408_F3	6676	-0.0838397	0.799091	DLLPKEKRHVL	0.850209	HLA-B08:01
1zup_BLCL1408_F3	6678											-1	0.84	VLRTHELV	0.511978	HLA-B08:01
1zup_BLCL1408_F3	6683	0.278555	0.847778	DTDYRSmEY								0.5	0.79	TnDYRSmEY
1zup_BLCL1408_F3	6685	0.457113	0.503	HGLIRKYGL	0.874592	HLA-B08:01
1zup_BLCL1408_F3	6687	-0.422103	0.836667	FINEKKYHL	0.944574	HLA-B08:01
1zup_BLCL1408_F3	6688						-0.7	0.992561	HGLIRKYGL	0.874592	HLA-B08:01
1zup_BLCL1408_F3	6689											-0.6	0.71	ELLKKHLL	0.913733	HLA-B08:01
1zup_BLCL1408_F3	6693	-0.108239	0.82	DLIKKVHV	0.664362	HLA-B08:01						1.4	0.76	EVLKKVHV	0.611517	HLA-B08:01
1zup_BLCL1408_F3	6694						0	0.912752	LQRIHAEI	0.499815	HLA-A01:01
1zup_BLCL1408_F3	6698											-1.3	0.75	KHKRSLTTK
1zup_BLCL1408_F3	6700						-0.3	0.959804	QSEREYIRY	0.976846	HLA-A01:01
1zup_BLCL1408_F3	6705	-1.49008	0.898889	ATELTHEDY	0.979268	HLA-A01:01						0.1	0.81	TAELTHEDY	0.831829	HLA-A01:01
1zup_BLCL1408_F3	6706	-0.445732	0.746	ASYAAQQHPQAAASY	0.52423	HLA-A01:01	-1	0.993597	ASYAAQQHPQAAASY	0.52423	HLA-A01:01
1zup_BLCL1408_F3	6711	0.586358	0.891111	HVKEQLETL	0.87629	HLA-B08:01	0.1	0.942731	HVKEQLETL	0.87629	HLA-B08:01
1zup_BLCL1408_F3	6713											-0.7	0.85	YLGCDNQDTLSSK	0.500567	HLA-A01:01
1zup_BLCL1408_F3	6717											0	0.77	LFNERREQL	0.821187	HLA-B08:01
1zup_BLCL1408_F3	6723											9.2	0.71	FVSVTRKVF	0.56805	HLA-B08:01
1zup_BLCL1408_F3	6724	-0.763142	0.89	FSQPRHISV	0.835002	HLA-B08:01	0.8	0.964951	FSQPRHISV	0.835002	HLA-B08:01
1zup_BLCL1408_F3	6726						0.7	0.961303	RSEKMTLSY	0.936227	HLA-A01:01
1zup_BLCL1408_F3	6729											-0.1	0.83	TVREKLASL	0.980789	HLA-B08:01
1zup_BLCL1408_F3	6731						-0.5	0.949156	RFKDRIVSM	0.923784	HLA-B08:01
1zup_BLCL1408_F3	6740											0.4	0.73	LERSKVEEL	0.662461	HLA-B08:01
1zup_BLCL1408_F3	6746						1	0.951588	YMERAAESY	0.905302	HLA-A01:01
1zup_BLCL1408_F3	6748						0.3	0.888418	TLSKKFQSL	0.989767	HLA-B08:01
1zup_BLCL1408_F3	6754						-1.4	0.968063	YTDHQnSSSYY
1zup_BLCL1408_F3	6759	0.847783	0.546923	RTQPMTAQAASY	0.683223	HLA-A01:01	-1	0.982047	RTQPMTAQAASY	0.683223	HLA-A01:01
1zup_BLCL1408_F3	6778						0.4	0.971985	SSDDSKLEY	0.998173	HLA-A01:01
1zup_BLCL1408_F3	6779	-0.130602	0.946	LSDSGVTQRY	0.994304	HLA-A01:01	1	0.970013	LSDSGVTQRY	0.994304	HLA-A01:01
1zup_BLCL1408_F3	6780						-0.4	0.961765	VSESHGQLSY	0.98492	HLA-A01:01
1zup_BLCL1408_F3	6781	-0.354968	0.8375	NPLERHVI	0.74136	HLA-B08:01						0.8	0.77	NPLERHVL	0.917486	HLA-B08:01
1zup_BLCL1408_F3	6782											0.7	0.83	DEKLKVRL	0.628308	HLA-B08:01
1zup_BLCL1408_F3	6788											-1	0.8	VLRTHELV	0.511978	HLA-B08:01
1zup_BLCL1408_F3	6789											0.8	0.82	SVLKGRYSL	0.761502	HLA-B08:01
1zup_BLCL1408_F3	6791	-0.390323	0.842	HTDIRSQLRY	0.997302	HLA-A01:01	1	0.967156	HTDIRSQLRY	0.997302	HLA-A01:01
1zup_BLCL1408_F3	6792											-1.1	0.76	FAHLGHEL	0.621483	HLA-B08:01
1zup_BLCL1408_F3	6795	-2.35753	0.85	mMDPNSTQRY			-0.2	0.961031	mMDPNSTQRY
1zup_BLCL1408_F3	6798	-0.673854	0.858889	FINEKKYHL	0.944574	HLA-B08:01
1zup_BLCL1408_F3	6799	-0.0560455	0.71	DTDYRSmEY								0.5	0.82	TnDYRSmEY
1zup_BLCL1408_F3	6803	0.464865	0.928889	YTNKEMLKY	0.990129	HLA-A01:01	-0.4	0.968349	YTNKEMLKY	0.990129	HLA-A01:01
1zup_BLCL1408_F3	6813						0.8	0.893222	RRNPGVVIY	0.522824	HLA-A01:01
1zup_BLCL1408_F3	6815											0.1	0.77	DPnSETAGSTKY
1zup_BLCL1408_F3	6822	0.233436	0.805556	ELHEKFDRL	0.857468	HLA-B08:01	0.4	0.927197	ELHEKFDRL	0.857468	HLA-B08:01
1zup_BLCL1408_F3	6830						-0.1	0.970841	GTERVRYLDRY	0.803931	HLA-A01:01
1zup_BLCL1408_F3	6833											0.8	0.8	ETLKKVEAL	0.825715	HLA-B08:01
1zup_BLCL1408_F3	6834											-0.9	0.7	LGRKAELL	0.515057	HLA-B08:01
1zup_BLCL1408_F3	6835											3.7	0.75	YLLVKPML	0.68201	HLA-B08:01
1zup_BLCL1408_F3	6836											5.4	0.72	LSDSGVTNmSL
1zup_BLCL1408_F3	6846											-9.4	0.72	YGNVRQHVL	0.933991	HLA-B08:01
1zup_BLCL1408_F3	6855						1.1	0.945687	DARKYEESL	0.87334	HLA-B08:01
1zup_BLCL1408_F3	6859						-3.1	0.937526	FVLDKTKHQL	0.655103	HLA-B08:01
1zup_BLCL1408_F3	6865	0.487821	0.584444	TLSKKFQSL	0.989767	HLA-B08:01						0.2	0.73	TLSKKFQSL	0.989767	HLA-B08:01
1zup_BLCL1408_F3	6866						1.4	0.922618	VLHVKTESL	0.957446	HLA-B08:01
1zup_BLCL1408_F3	6867											0	0.7	KPYLRTSL	0.911776	HLA-B08:01
1zup_BLCL1408_F3	6868	0.504308	0.76125	KPYIRTSL	0.911268	HLA-B08:01						0.2	0.87	KPYLTRSL	0.674526	HLA-B08:01
1zup_BLCL1408_F3	6869	0.265248	0.78375	YVNLKRTI	0.753519	HLA-B08:01						1	0.8	YVNLKRTL	0.923294	HLA-B08:01
1zup_BLCL1408_F3	6870	0.265039	0.7075	QVDESGTKVDEY	0.955792	HLA-A01:01	-0.1	0.973537	QVDESGTKVDEY	0.955792	HLA-A01:01
1zup_BLCL1408_F3	6883											0.3	0.75	LYREKEAVL	0.711177	HLA-B08:01
1zup_BLCL1408_F3	6885	1.36785	0.75	NTETTEDVKGRIY	0.813588	HLA-A01:01	1.1	0.972894	NTETTEDVKGRIY	0.813588	HLA-A01:01
1zup_BLCL1408_F3	6888											5.7	0.7	RQYTRSNDL
1zup_BLCL1408_F3	6893						0.2	0.946922	AMKERNIQF	0.881271	HLA-B08:01
1zup_BLCL1408_F3	6894	0.693447	0.69	RSVLHEVM	0.500189	HLA-A01:01
1zup_BLCL1408_F3	6902	-0.58985	0.731111	ITDEQRQYY	0.998698	HLA-A01:01	0.1	0.960005	ITDEQRQYY	0.998698	HLA-A01:01
1zup_BLCL1408_F3	6908	0.0752711	0.757	HTDIRSQLRY	0.997302	HLA-A01:01
1zup_BLCL1408_F3	6909	-1.88078	0.883	mMDPNSTQRY
1zup_BLCL1408_F3	6920	-2.013	0.687778	HGLIRKYGL	0.874592	HLA-B08:01
1zup_BLCL1408_F3	6924	0.690128	0.843333	NMKEIKETL	0.953442	HLA-B08:01
1zup_BLCL1408_F3	6943											-5	0.71	DMLSSGmAHQL
1zup_BLCL1408_F3	6944	0.563176	0.8725	YATLHHVI	0.535725	HLA-B08:01						-1.3	0.71	SFTLHHVL	0.548916	HLA-B08:01
1zup_BLCL1408_F3	6947						-0.7	0.973563	HYTQKSLSLSPG	0.498462	HLA-A01:01
1zup_BLCL1408_F3	6951						-0.3	0.959156	SSESGHYYSY	0.976319	HLA-A01:01
1zup_BLCL1408_F3	6954	-0.422103	0.843333	FINEKKYHL	0.944574	HLA-B08:01	-0.6	0.924679	FINEKKYHL	0.944574	HLA-B08:01
1zup_BLCL1408_F3	6963											8.9	0.72	LRLTTAHKSL	0.500027	HLA-A01:01
1zup_BLCL1408_F3	6966						-0.4	0.980199	LHPPPHLKTQL	0.514816	HLA-B08:01
1zup_BLCL1408_F3	6969											0.6	0.73	LVHVQTESL	0.692315	HLA-B08:01
1zup_BLCL1408_F3	6971						-1.2	0.935171	qSEAGSHTLQSmY
1zup_BLCL1408_F3	6976											0.1	0.71	ELLELSRR	0.492091	HLA-A01:01
1zup_BLCL1408_F3	6978						-1.1	0.89944	VPNqKRLTL
1zup_BLCL1408_F3	6980	-3.76185	0.81625	YATLHHVI	0.535725	HLA-B08:01	-3.1	0.906145	YATLHHVI	0.535725	HLA-B08:01
1zup_BLCL1408_F3	6984											0	0.72	KPYLRTSL	0.911776	HLA-B08:01
1zup_BLCL1408_F3	6985	0.29972	0.80125	KPYIRTSL	0.911268	HLA-B08:01						0.2	0.84	KPYLRTSL	0.911776	HLA-B08:01
1zup_BLCL1408_F3	6987						-0.4	0.906986	DRIYKNVM	0.570181	HLA-B08:01
1zup_BLCL1408_F3	7000	-0.85579	0.833636	TTDNEISRTEY	0.995401	HLA-A01:01	-1.3	0.984869	TTDNEISRTEY	0.995401	HLA-A01:01
1zup_BLCL1408_F3	7001	0.926022	0.9475	NILEKHSL	0.890986	HLA-B08:01						0.6	0.85	NLLEKHSL	0.931354	HLA-B08:01
1zup_BLCL1408_F3	7009	-0.0224712	0.907	VTDDSPKYNY	0.996111	HLA-A01:01	-0.2	0.966727	VTDDSPKYNY	0.996111	HLA-A01:01
1zup_BLCL1408_F3	7017	0.232814	0.731111	ITDEQRQYY	0.998698	HLA-A01:01
1zup_BLCL1408_F3	7022	-0.588395	0.71	IYKRNIEL	0.565805	HLA-B08:01						1.3	0.76	LYRKLNEL	0.556331	HLA-B08:01
1zup_BLCL1408_F3	7025						-0.2	0.89617	QRLLRDQAL	0.631169	HLA-B08:01
1zup_BLCL1408_F3	7029						-0.2	0.981333	FTERSKLIDHY	0.981543	HLA-A01:01
1zup_BLCL1408_F3	7035											-6.7	0.7	CSsDTESLVNR
1zup_BLCL1408_F3	7037	-1.56295	0.872	mMDPNSTQRY
1zup_BLCL1408_F3	7041						-0.1	0.952594	RSEEPETPAAY	0.847297	HLA-A01:01
1zup_BLCL1408_F3	7043						-0.4	0.958122	YPLRKYAV	0.788029	HLA-B08:01
1zup_BLCL1408_F3	7047	1.23788	0.621111	QVKYKYSEL	0.950689	HLA-B08:01
1zup_BLCL1408_F3	7055											3.5	0.85	LLLMESLLL	0.507962	HLA-C07:01
1zup_BLCL1408_F3	7058	0.349435	0.71875	HTLTRLQL	0.736244	HLA-B08:01						0.3	0.84	HTLLRQTL	0.831698	HLA-B08:01
1zup_BLCL1408_F3	7059	-0.306542	0.90125	YTEKQIGY	0.921854	HLA-A01:01	-0.6	0.909282	YTEKQIGY	0.921854	HLA-A01:01
1zup_BLCL1408_F3	7067											-0.6	0.72	LLRSKVESL	0.986399	HLA-B08:01
1zup_BLCL1408_F3	7069						-0.5	0.879968	SAIYKRVL	0.815046	HLA-B08:01
1zup_BLCL1408_F3	7070						0.8	0.951101	RPLSREITM	0.813798	HLA-B08:01
1zup_BLCL1408_F3	7072	-1.39216	0.853	SIPAKLHNSL	0.564598	HLA-B08:01	-2.2	0.881519	SIPAKLHNSL	0.564598	HLA-B08:01
1zup_BLCL1408_F3	7073											-3.5	0.8	SLLTPKVEL	0.637178	HLA-B08:01
1zup_BLCL1408_F3	7076	0.117635	0.84	DSELQREGVSHY	0.810876	HLA-A01:01
1zup_BLCL1408_F3	7077	-1.01926	0.960833	ETYGDMADCCEK	0.502239	HLA-A01:01						-2.9	0.73	ETYGDMADYPDSD	0.497213	HLA-A01:01
1zup_BLCL1408_F3	7084						-0.3	0.902802	LLRNKAVQL	0.970923	HLA-B08:01
1zup_BLCL1408_F3	7088						-0.4	0.957019	NNKLREYQL	0.934576	HLA-B08:01
1zup_BLCL1408_F3	7089											0.8	0.72	LNRPKVSL	0.87942	HLA-B08:01
1zup_BLCL1408_F3	7092	0.496967	0.947778	NVDPVQHTY	0.994586	HLA-A01:01	1	0.909282	NVDPVQHTY	0.994586	HLA-A01:01
1zup_BLCL1408_F3	7095	0.173791	0.967778	VTEIDQDKY	0.991461	HLA-A01:01	0	0.965299	VTEIDQDKY	0.991461	HLA-A01:01
1zup_BLCL1408_F3	7096	-12.5702	0.677	IGKLRNKE	0.431406	HLA-A01:01
1zup_BLCL1408_F3	7098											-1.8	0.81	AALRVKTSL	0.67878	HLA-B08:01
1zup_BLCL1408_F3	7099	-1.959	0.80125	NIKEKLFS	0.489075	HLA-A01:01	-1.8	0.928496	NLKqKVTF
1zup_BLCL1408_F3	7100											6.9	0.87	HPMLFTYAL	0.805702	HLA-B08:01
1zup_BLCL1408_F3	7101	-0.814309	0.966667	ETYGDmADCCEK								6.4	0.78	ETYGDmADMEnAM
1zup_BLCL1408_F3	7103											-0.6	0.72	FLNEKKYHL	0.963954	HLA-B08:01
1zup_BLCL1408_F3	7105											0	0.89	SPYLKRTL	0.941528	HLA-B08:01
1zup_BLCL1408_F3	7113						0.2	0.915161	AALRVKTSL	0.67878	HLA-B08:01
1zup_BLCL1408_F3	7116	0.197953	0.788182	TTDNEISRTEY	0.995401	HLA-A01:01
1zup_BLCL1408_F3	7118	0.296129	0.683	VTEYHGNFSA	0.513838	HLA-A01:01
1zup_BLCL1408_F3	7120											6.2	0.71	LKEEHtPLLEK
1zup_BLCL1408_F3	7123						0.7	0.895231	HAKEYIQQL	0.943817	HLA-B08:01
1zup_BLCL1408_F3	7124	-0.572759	0.943529	ETYGDMADCCEKQEPER	0.492104	HLA-A01:01
1zup_BLCL1408_F3	7125	-1.37851	0.8825	DSELQREGVSHY	0.810876	HLA-A01:01	-1.6	0.989938	DSELQREGVSHY	0.810876	HLA-A01:01
1zup_BLCL1408_F3	7127	0.310436	0.804	VTDDSPKYNY	0.996111	HLA-A01:01
1zup_BLCL1408_F3	7133						0.1	0.902899	RRQEAIYEM	0.512565	HLA-B08:01
1zup_BLCL1408_F3	7134	-1.47799	0.96	DSDSMEDTGHY	0.944547	HLA-A01:01	-1.5	0.965299	DSDSMEDTGHY	0.944547	HLA-A01:01
1zup_BLCL1408_F3	7139											0.1	0.7	KAtsGDNQnTLSSK
1zup_BLCL1408_F3	7142	0.0978531	0.928889	TFKEKVTSL	0.986006	HLA-B08:01	0.2	0.987424	TFKEKVTSL	0.986006	HLA-B08:01
1zup_BLCL1408_F3	7143						0.2	0.945306	WSQHYHQGYY	0.770521	HLA-A01:01
1zup_BLCL1408_F3	7146	-0.984287	0.967	MTESYEQEKY	0.985714	HLA-A01:01	-1.1	0.976763	MTESYEQEKY	0.985714	HLA-A01:01
1zup_BLCL1408_F3	7149											-0.3	0.79	FLQRRPTL	0.909775	HLA-B08:01
1zup_BLCL1408_F3	7154						0.5	0.940215	YTAPQPGKY	0.991358	HLA-A01:01
1zup_BLCL1408_F3	7162	-1.49115	0.86625	YTYGKHIL	0.623282	HLA-B08:01						0.4	0.72	YTYGKHLL	0.603935	HLA-B08:01
1zup_BLCL1408_F3	7163											2.2	0.81	LLMVFLNL	0.505972	HLA-B08:01
1zup_BLCL1408_F3	7164											-3.4	0.8	LSERADSMQY	0.972772	HLA-A01:01
1zup_BLCL1408_F3	7168											-0.9	0.86	HADLGCTLPDTEK	0.50457	HLA-A01:01
1zup_BLCL1408_F3	7174						0.3	0.92483	DIRQKALKL	0.985253	HLA-B08:01
1zup_BLCL1408_F3	7186	0.093511	0.96625	YTYGKHIL	0.623282	HLA-B08:01	0.1	0.95571	YTYGKHIL	0.623282	HLA-B08:01
1zup_BLCL1408_F3	7189						0.2	0.930955	YSVEHNQL	0.547423	HLA-C07:01
1zup_BLCL1408_F3	7190						0.2	0.980591	LSEVnRTGTQY
1zup_BLCL1408_F3	7193	-0.74872	0.966667	ETYGDMADCCEK	0.502239	HLA-A01:01						-2.9	0.73	ETYGDMADYPDSD	0.497213	HLA-A01:01
1zup_BLCL1408_F3	7194						0.1	0.926832	YIHGRLQSL	0.966807	HLA-B08:01
1zup_BLCL1408_F3	7197						0.6	0.891065	NIYTRRVL	0.869212	HLA-B08:01
1zup_BLCL1408_F3	7198	-0.338566	0.961	VTDGPGNYKY	0.997552	HLA-A01:01	0.2	0.969833	VTDGPGNYKY	0.997552	HLA-A01:01
1zup_BLCL1408_F3	7200	0.142374	0.936667	TLKQKLVNM	0.982354	HLA-B08:01	0.1	0.988263	TLKQKLVNM	0.982354	HLA-B08:01
1zup_BLCL1408_F3	7206						0.3	0.989002	NHYTQKSLSLSPG	0.462119	HLA-A01:01
1zup_BLCL1408_F3	7207											-6.1	0.8	HPmLTMLHL
1zup_BLCL1408_F3	7209	0.713348	0.925	EAFYKKDL	0.600091	HLA-B08:01	0.4	0.940751	EAFYKKDL	0.600091	HLA-B08:01
1zup_BLCL1408_F3	7210	-0.602173	0.917	mTESYEQEKY			-0.6	0.967935	mTESYEQEKY
1zup_BLCL1408_F3	7211	5.67479	0.58	DIKVKEQSL	0.992914	HLA-B08:01
1zup_BLCL1408_F3	7216											-3.4	0.84	HPMLRYYL	0.922058	HLA-B08:01
1zup_BLCL1408_F3	7217	-0.948132	0.966667	ETYGDmADCCEK								-3	0.72	ETYGDmADYPDSD
1zup_BLCL1408_F3	7218	-0.348288	0.80375	EAFYKKDL	0.600091	HLA-B08:01						0.7	0.71	EAFYKLAAT	0.53145	HLA-B08:01
1zup_BLCL1408_F3	7220											-0.1	0.88	LPRnREVAL
1zup_BLCL1408_F3	7222	-1.62345	0.78	ATEVVDKEKNLY	0.973432	HLA-A01:01	-0.9	0.988109	ATEVVDKEKNLY	0.973432	HLA-A01:01
1zup_BLCL1408_F3	7226	-0.268756	0.79375	IRNLHNVL	0.543935	HLA-B08:01	1.1	0.913447	IRNLHNVL	0.543935	HLA-B08:01
1zup_BLCL1408_F3	7234											8.8	0.87	YLDENEDVGY	0.965624	HLA-A01:01
1zup_BLCL1408_F3	7241	0.0829051	0.96875	DAVVKHVL	0.786108	HLA-B08:01
1zup_BLCL1408_F3	7249	-1.63473	0.72	ATDMPVKNQY	0.991402	HLA-A01:01	-0.6	0.95936	ATDMPVKNQY	0.991402	HLA-A01:01
1zup_BLCL1408_F3	7253	0.623079	0.87	YSHAAGQGTGLY	0.839226	HLA-A01:01	-0.4	0.968063	YSHAAGQGTGLY	0.839226	HLA-A01:01
1zup_BLCL1408_F3	7254						0.2	0.980591	GSALRPSTSRSLY	0.607482	HLA-A01:01
1zup_BLCL1408_F3	7257											-0.9	0.77	LYCGnNEDTLSSK
1zup_BLCL1408_F3	7259						-0.2	0.958663	GTnTTGISEKY
1zup_BLCL1408_F3	7262											8.2	0.77	VPDLEQHPSL	0.543548	HLA-B08:01
1zup_BLCL1408_F3	7264	-0.0921529	0.942222	TFKEKVTSL	0.986006	HLA-B08:01
1zup_BLCL1408_F3	7267											-0.2	0.78	LPAVREKL	0.732897	HLA-B08:01
1zup_BLCL1408_F3	7268											-2.5	0.94	YTRRVL
1zup_BLCL1408_F3	7269	-0.146054	0.915	FEMSRHSL	0.747276	HLA-B08:01	-0.3	0.968127	FEMSRHSL	0.747276	HLA-B08:01
1zup_BLCL1408_F3	7270	-0.0665369	0.966	MTESYEQEKY	0.985714	HLA-A01:01
1zup_BLCL1408_F3	7274											-7.4	0.73	HVLGPMKAL	0.548577	HLA-B08:01
1zup_BLCL1408_F3	7279											1.2	0.74	VPDERRYSL	0.931658	HLA-B08:01
1zup_BLCL1408_F3	7284						0	0.890956	NIHLRSTL	0.909295	HLA-B08:01
1zup_BLCL1408_F3	7288											-2.9	0.72	ATqVDSRAmQEY
1zup_BLCL1408_F3	7297	0.696808	0.925	YTYGKHIL	0.623282	HLA-B08:01
1zup_BLCL1408_F3	7302											-8.5	0.76	TTDSYMYNY	0.997835	HLA-A01:01
1zup_BLCL1408_F3	7303											2.3	0.76	TTDYsTGADY
1zup_BLCL1408_F3	7304	0.138454	0.765556	SLKSKVLSV	0.981771	HLA-B08:01
1zup_BLCL1408_F3	7307	-1.49454	0.956	MMDPNSTQRY	0.990443	HLA-A01:01
1zup_BLCL1408_F3	7309	-0.272593	0.927273	VSSTSEIGTRY	0.822609	HLA-A01:01	-0.4	0.956674	VSSTSEIGTRY	0.822609	HLA-A01:01
1zup_BLCL1408_F3	7314											-0.1	0.74	TVRQVHEL	0.726859	HLA-B08:01
1zup_BLCL1408_F3	7315	-1.69561	0.9575	ETYGDMADCCEK	0.502239	HLA-A01:01
1zup_BLCL1408_F3	7317											0.6	0.71	LNYTRRVL	0.653721	HLA-B08:01
1zup_BLCL1408_F3	7320	0.219572	0.88375	HGLIRESL	0.746844	HLA-B08:01						-0.1	0.93	HGLLRESL	0.748508	HLA-B08:01
1zup_BLCL1408_F3	7322	-0.65151	0.73375	IAKIREEL	0.86341	HLA-B08:01						-3.2	0.71	LAKLDWLL	0.509663	HLA-B08:01
1zup_BLCL1408_F3	7335											0.2	0.74	HPMLNDPRL	0.575282	HLA-B08:01
1zup_BLCL1408_F3	7336						0.5	0.921448	ELRNKINEL	0.993358	HLA-B08:01
1zup_BLCL1408_F3	7343											-2.2	0.77	YLKELRAV	0.697149	HLA-B08:01
1zup_BLCL1408_F3	7344	-0.255218	0.9625	NLIKKTVL	0.933389	HLA-B08:01						0.8	0.96	NLLKKTVL	0.907686	HLA-B08:01
1zup_BLCL1408_F3	7345	3.3181	0.967778	LTDPEAAKY	0.999009	HLA-A01:01
1zup_BLCL1408_F3	7347	0.278887	0.902222	ALHERIQAL	0.979182	HLA-B08:01	0.6	0.973324	ALHERIQAL	0.979182	HLA-B08:01
1zup_BLCL1408_F3	7348						-0.3	0.983277	YTESQSSLRSSY	0.995041	HLA-A01:01
1zup_BLCL1408_F3	7350						-0.4	0.901234	YIDENqDRY
1zup_BLCL1408_F3	7352						1.3	0.937837	NTDRPDASAVY	0.984475	HLA-A01:01
1zup_BLCL1408_F3	7355						0	0.920976	VIDKESEVY	0.976381	HLA-A01:01
1zup_BLCL1408_F3	7356	-2.03771	0.832	AVDFAERHGY	0.889811	HLA-A01:01
1zup_BLCL1408_F3	7357	-0.37426	0.874	mmDPNSTQRY
1zup_BLCL1408_F3	7359	-0.0440986	0.871	MSEEQQQHLY	0.993257	HLA-A01:01	-0.2	0.964951	MSEEQQQHLY	0.993257	HLA-A01:01
1zup_BLCL1408_F3	7364	1.45523	0.69875	YPTIRKTL	0.917835	HLA-B08:01
1zup_BLCL1408_F3	7366											0.7	0.86	MPSEKVmV
1zup_BLCL1408_F3	7370											0.1	0.71	VTELNEDKY	0.986157	HLA-A01:01
1zup_BLCL1408_F3	7372	0.21029	0.792222	LmERNNLSY			0.2	0.892364	LmERNNLSY
1zup_BLCL1408_F3	7373											-0.9	0.88	YLGCDNEDTLSSK	0.502385	HLA-A01:01
1zup_BLCL1408_F3	7378	1.39278	0.645556	DIKKRLSQL	0.995138	HLA-B08:01						0.3	0.7	DLKKGALRSL	0.653564	HLA-B08:01
1zup_BLCL1408_F3	7379	-0.847954	0.964167	GVFQECCQAEDK	0.499931	HLA-A01:01
1zup_BLCL1408_F3	7383											-1.7	0.7	VPDEYRRSL	0.773159	HLA-B08:01
1zup_BLCL1408_F3	7387	-0.283603	0.945556	NTEEEGLKY	0.996887	HLA-A01:01						0.2	0.74	SQqEEGLKY
1zup_BLCL1408_F3	7388											1	0.78	LQRLKPEL	0.742316	HLA-B08:01
1zup_BLCL1408_F3	7395						0.4	0.975522	TTDSSYGQNY	0.99543	HLA-A01:01
1zup_BLCL1408_F3	7398	0.470244	0.906667	ELGARVRAL	0.96269	HLA-B08:01						0.5	0.83	ELQRVRAL	0.892059	HLA-B08:01
1zup_BLCL1408_F3	7400											8.4	0.7	LEQKHRKEL	0.620169	HLA-B08:01
1zup_BLCL1408_F3	7403						1.3	0.959643	AVDFAERHGY	0.889811	HLA-A01:01
1zup_BLCL1408_F3	7405	-0.45053	0.917	mMDPNSTQRY			-0.2	0.961688	MmDPNSTQRY
1zup_BLCL1408_F3	7406											5.1	0.7	TAEVDSAMTAQEY	0.693808	HLA-A01:01
1zup_BLCL1408_F3	7407											-9	0.74	KtstSTQRY
1zup_BLCL1408_F3	7412						-1	0.933063	RTMVKTLEY	0.823108	HLA-A01:01
1zup_BLCL1408_F3	7418	-6.95407	0.723333	KGNmALAIKL
1zup_BLCL1408_F3	7420						0	0.949055	SLKSKVLSV	0.981771	HLA-B08:01
1zup_BLCL1408_F3	7427	-0.0458744	0.916	MMDPNSTQRY	0.990443	HLA-A01:01	0	0.962634	MMDPNSTQRY	0.990443	HLA-A01:01
1zup_BLCL1408_F3	7433	-0.113855	0.788889	ISKPRNLSL	0.946704	HLA-B08:01	1.2	0.956063	ISKPRNLSL	0.946704	HLA-B08:01
1zup_BLCL1408_F3	7438	0.365712	0.825556	KLIDRTESL	0.842397	HLA-B08:01						-0.1	0.84	KLLDETRSL	0.60434	HLA-C07:01
1zup_BLCL1408_F3	7439	-0.751012	0.682222	FPPKPKDTL	0.68282	HLA-B08:01
1zup_BLCL1408_F3	7440											-9.5	0.7	LDQLEVVSL	0.505019	HLA-B08:01
1zup_BLCL1408_F3	7442	0.194359	0.806667	HIDVGGHmY			0.4	0.968191	HIDVGGHmY
1zup_BLCL1408_F3	7447						1	0.937588	EGFPRRAVM	0.874826	HLA-B08:01
1zup_BLCL1408_F3	7450											0.7	0.72	nLQRGKVSL
1zup_BLCL1408_F3	7451											-0.4	0.79	RESLQRLTY	0.569731	HLA-A01:01
1zup_BLCL1408_F3	7453						-0.2	0.929137	TmDNPTTTQY
1zup_BLCL1408_F3	7460	-0.840062	0.765	YPTIRKTL	0.917835	HLA-B08:01						-2.2	0.82	YPTLRKTL	0.914969	HLA-B08:01
1zup_BLCL1408_F3	7461	-0.0565754	0.967778	LTDPEAAKY	0.999009	HLA-A01:01	0.9	0.898936	LTDPEAAKY	0.999009	HLA-A01:01
1zup_BLCL1408_F3	7464	0.32495	0.775556	DILHRSESV	0.73446	HLA-B08:01						1	0.88	VELHRSESV	0.524145	HLA-B08:01
1zup_BLCL1408_F3	7465	-1.12948	0.893333	ALDDYEHHY	0.990318	HLA-A01:01
1zup_BLCL1408_F3	7467						0.9	0.93715	YTDHqnSSSYY
1zup_BLCL1408_F3	7472	0.0965074	0.922	mmDPNSTQRY			-0.9	0.975424	mmDPNSTQRY
1zup_BLCL1408_F3	7473	0.0376517	0.829167	YTESQSSLRSSY	0.995041	HLA-A01:01
1zup_BLCL1408_F3	7475											0.4	0.79	KNLKQLSL	0.550331	HLA-B08:01
1zup_BLCL1408_F3	7476											2.7	0.7	LTDEQREYY
1zup_BLCL1408_F3	7478	-1.86682	0.67375	DAKGRIVL	0.915667	HLA-B08:01
1zup_BLCL1408_F3	7482	0.446756	0.80625	YPTIRKTL	0.917835	HLA-B08:01	0.2	0.924453	YPTIRKTL	0.917835	HLA-B08:01
1zup_BLCL1408_F3	7485	0.961103	0.958889	HLQEKLQSL	0.982986	HLA-B08:01	0.1	0.981939	HLQEKLQSL	0.982986	HLA-B08:01
1zup_BLCL1408_F3	7487						-0.1	0.890737	SLQKRVVEL	0.972546	HLA-B08:01
1zup_BLCL1408_F3	7489											-6.3	0.73	FLLFFHPPST	0.500173	HLA-B08:01
1zup_BLCL1408_F3	7493											3	0.75	TERSWNLSY	0.579237	HLA-A01:01
1zup_BLCL1408_F3	7502											-8.7	0.81	YRCDNQDTLSSK	0.500443	HLA-A01:01
1zup_BLCL1408_F3	7504	0.640185	0.967778	NTEEEGLKY	0.996887	HLA-A01:01						0.2	0.77	QSqEEGLKY
1zup_BLCL1408_F3	7506											-3.9	0.75	DSsCTESLVNR
1zup_BLCL1408_F3	7507	-3.22328	0.631	QTALPGNDRY	0.94786	HLA-A01:01
1zup_BLCL1408_F3	7508											-4.2	0.71	CLLNHRVL	0.524692	HLA-B08:01
1zup_BLCL1408_F3	7509	0.949433	0.722222	ELKQRVEAF	0.976178	HLA-B08:01	0.3	0.934911	ELKQRVEAF	0.976178	HLA-B08:01
1zup_BLCL1408_F3	7512	0.147195	0.845	LPKYGVKV	0.491807	HLA-B08:01						0.2	0.84	LPKYGVKV	0.491807	HLA-B08:01
1zup_BLCL1408_F3	7517	0.0639857	0.825556	ELGARVRAL	0.96269	HLA-B08:01						0.5	0.85	ELRQVRAL	0.877513	HLA-B08:01
1zup_BLCL1408_F3	7518	-0.427718	0.83375	TLINHRVL	0.714308	HLA-B08:01						0.1	0.78	TLLNHRVL	0.676119	HLA-B08:01
1zup_BLCL1408_F3	7524						0.5	0.962597	YSEGYPGQRY	0.993245	HLA-A01:01
1zup_BLCL1408_F3	7529	-0.141882	0.91875	TLINHRVL	0.714308	HLA-B08:01						0.4	0.83	TLLNHRVL	0.676119	HLA-B08:01
1zup_BLCL1408_F3	7531											-2.9	0.78	TWFLKSESL	0.625617	HLA-B08:01
1zup_BLCL1408_F3	7532						0	0.989433	YSDRSSGGSYRDSYDSY	0.964688	HLA-A01:01
1zup_BLCL1408_F3	7538	-1.81646	0.963	MMDPNSTQRY	0.990443	HLA-A01:01
1zup_BLCL1408_F3	7539											0	0.71	TVKVKSLSV	0.963096	HLA-B08:01
1zup_BLCL1408_F3	7544						1.8	0.926097	LTEVnKAGTQY
1zup_BLCL1408_F3	7550	1.83868	0.645556	FPPKPKDTL	0.68282	HLA-B08:01
1zup_BLCL1408_F3	7552											1.4	0.7	HLLETNRSL
1zup_BLCL1408_F3	7560	-0.822297	0.84875	LPKYGVKV	0.491807	HLA-B08:01						-0.4	0.84	LPKYGVKV	0.491807	HLA-B08:01
1zup_BLCL1408_F3	7561						0.5	0.968318	DMAKRVANL	0.973039	HLA-B08:01
1zup_BLCL1408_F3	7562											-5.9	0.79	TVKLGMPLSL	0.532183	HLA-B08:01
1zup_BLCL1408_F3	7564											5.4	0.89	CHPKLHNEM	0.502447	HLA-C07:01
1zup_BLCL1408_F3	7565											9.5	0.72	LNHVVGL
1zup_BLCL1408_F3	7566	-0.65674	0.934	TTESQELSRY	0.992391	HLA-A01:01	0.3	0.970958	TTESQELSRY	0.992391	HLA-A01:01
1zup_BLCL1408_F3	7570	-0.537519	0.72375	YPTIRKTL	0.917835	HLA-B08:01
1zup_BLCL1408_F3	7573											-9.4	0.81	TVKLRNQSL	0.993674	HLA-B08:01
1zup_BLCL1408_F3	7574											-9.4	0.7	SDAGAELQTMM	0.502117	HLA-A01:01
1zup_BLCL1408_F3	7581											-0.3	0.73	MPMVKKEL
1zup_BLCL1408_F3	7592	2.26202	0.71375	YPTIRKTL	0.917835	HLA-B08:01						0.2	0.79	YPTLRKTL	0.914969	HLA-B08:01
1zup_BLCL1408_F3	7593											1	0.8	MPSEVKVm
1zup_BLCL1408_F3	7594											-1.1	0.7	TLDPDQLAK	0.689817	HLA-A01:01
1zup_BLCL1408_F3	7601						0.8	0.883632	MPMKVKqL
1zup_BLCL1408_F3	7604						0.6	0.943471	DLNKRVQDL	0.95859	HLA-B08:01
1zup_BLCL1408_F3	7605	1.69129	0.871111	HLQEKLQSL	0.982986	HLA-B08:01						1.2	0.73	VTTENQLKY	0.970275	HLA-A01:01
1zup_BLCL1408_F3	7607											1.5	0.72	DMLSRRTL	0.936122	HLA-B08:01
1zup_BLCL1408_F3	7609											1	0.8	LnMTRRSL
1zup_BLCL1408_F3	7614	-0.075413	0.817778	DRLQDLIDI	0.500846	HLA-B08:01
1zup_BLCL1408_F3	7626						0.4	0.946656	QTALPGNDRY	0.94786	HLA-A01:01
1zup_BLCL1408_F3	7631	1.75007	0.642222	ITDKNSLAY	0.998663	HLA-A01:01
1zup_BLCL1408_F3	7636	0.0844582	0.794	YSEGYPGQRY	0.993245	HLA-A01:01
1zup_BLCL1408_F3	7637											-3.2	0.7	ATEDPSMKTNY	0.977915	HLA-A01:01
1zup_BLCL1408_F3	7639											0.1	0.8	TLLNHRVL	0.676119	HLA-B08:01
1zup_BLCL1408_F3	7645											0.4	0.7	KVYHYEL
1zup_BLCL1408_F3	7652	-0.00845912	0.858889	LAAARLAAA	0.554416	HLA-B08:01	0.5	0.932929	LAAARLAAA	0.554416	HLA-B08:01
1zup_BLCL1408_F3	7655											0.2	0.79	MNQHRYVEL
1zup_BLCL1408_F3	7659						-1.8	0.902509	RTDALQPPHEY	0.978295	HLA-A01:01
1zup_BLCL1408_F3	7663						-0.2	0.920421	DAREKISL	0.964225	HLA-B08:01
1zup_BLCL1408_F3	7664											-3.7	0.84	LVAKWVLSL	0.521939	HLA-B08:01
1zup_BLCL1408_F3	7665						0.8	0.934059	YALRKNISV	0.774546	HLA-B08:01
1zup_BLCL1408_F3	7674											-4.5	0.74	LSEAQCTSSLY	0.973216	HLA-A01:01
1zup_BLCL1408_F3	7675	0.261801	0.943333	SVMKVKAEL	0.712079	HLA-B08:01	-0.1	0.95056	SVMKVKAEL	0.712079	HLA-B08:01
1zup_BLCL1408_F3	7676	-0.175524	0.762222	FPPKPKDTL	0.68282	HLA-B08:01
1zup_BLCL1408_F3	7681	0.94639	0.806667	DMAKRVANL	0.973039	HLA-B08:01
1zup_BLCL1408_F3	7684	0.824719	0.764444	VLNQKRLSL	0.976857	HLA-B08:01	-0.7	0.935236	VLNQKRLSL	0.976857	HLA-B08:01
1zup_BLCL1408_F3	7686											-0.4	0.7	LLDKVNVGSY
1zup_BLCL1408_F3	7687						-0.9	0.994973	MSEPHYGHAGTVY	0.942283	HLA-A01:01
1zup_BLCL1408_F3	7691						0.3	0.880448	RPREVTVSL	0.855811	HLA-B08:01
1zup_BLCL1408_F3	7692											-0.5	0.78	YSLLRHGL	0.628225	HLA-B08:01
1zup_BLCL1408_F3	7697	0.448442	0.95125	YEDVSTRY	0.674872	HLA-A01:01						0.3	0.88	YEDVSTRY	0.674872	HLA-A01:01
1zup_BLCL1408_F3	7702											3.4	0.71	HEFsLGEHLY
1zup_BLCL1408_F3	7709						-0.1	0.946335	ELYRKYEM	0.856387	HLA-B08:01
1zup_BLCL1408_F3	7714											-7	0.73	LEVHMKmQL
1zup_BLCL1408_F3	7720											1.1	0.82	LPHNLLCL	0.52367	HLA-B08:01
1zup_BLCL1408_F3	7722						-0.2	0.92956	RTQPMTAqAASY
1zup_BLCL1408_F3	7725											1	0.77	LnMTRRSL
1zup_BLCL1408_F3	7726											-4.6	0.77	LVAKWSLVL
1zup_BLCL1408_F3	7731						0.4	0.958663	LLHERVNEL	0.967439	HLA-B08:01
1zup_BLCL1408_F3	7736						1.1	0.948129	LSDSGVTqRY
1zup_BLCL1408_F3	7739											-0.7	0.81	LDKLmPVEL
1zup_BLCL1408_F3	7740	1.23748	0.714	RSDAEKQLLY	0.987917	HLA-A01:01
1zup_BLCL1408_F3	7746	0.569041	0.835556	ITDKNSLAY	0.998663	HLA-A01:01
1zup_BLCL1408_F3	7751	-0.635922	0.80125	EMLGRHIV	0.559121	HLA-B08:01						-0.9	0.79	EMLGRHLV	0.559291	HLA-B08:01
1zup_BLCL1408_F3	7759	1.77364	0.698182	TSDFSRGDTAY	0.967349	HLA-A01:01	1.4	0.980396	TSDFSRGDTAY	0.967349	HLA-A01:01
1zup_BLCL1408_F3	7760											0.6	0.83	FPLSKKTL	0.930401	HLA-B08:01
1zup_BLCL1408_F3	7769						1	0.880448	VSVGPRVHI	0.512853	HLA-C07:01
1zup_BLCL1408_F3	7772											-1.4	0.76	LLRVRSEL	0.898023	HLA-B08:01
1zup_BLCL1408_F3	7773											4.3	0.7	DLLNHFKEL	0.908344	HLA-B08:01
1zup_BLCL1408_F3	7777						0.4	0.908095	SLKPKLIEA	0.842612	HLA-B08:01
1zup_BLCL1408_F3	7779											-0.2	0.75	DAREKLSL	0.964384	HLA-B08:01
1zup_BLCL1408_F3	7788						0	0.892794	MTESYEqEKY
1zup_BLCL1408_F3	7792	0.0489564	0.735556	HISQRLESL	0.929167	HLA-B08:01	1.3	0.959074	HISQRLESL	0.929167	HLA-B08:01
1zup_BLCL1408_F3	7797											-1	0.75	YTLHVKDCL	0.505114	HLA-C07:01
1zup_BLCL1408_F3	7798											0.5	0.72	YTPCSCGARY	0.724422	HLA-A01:01
1zup_BLCL1408_F3	7799	0.261801	0.941111	SVMKVKAEL	0.712079	HLA-B08:01
1zup_BLCL1408_F3	7807	0.506617	0.93	VADKVHLmY
1zup_BLCL1408_F3	7814	-0.225759	0.941818	ETDSSEEISRY	0.991531	HLA-A01:01	-0.9	0.976553	ETDSSEEISRY	0.991531	HLA-A01:01
1zup_BLCL1408_F3	7815	-0.287481	0.691111	ATDYHVRVY	0.983875	HLA-A01:01						0.7	0.71	ATDYHVRYV	0.596813	HLA-A01:01
1zup_BLCL1408_F3	7816	0.759199	0.842222	ATDYHVRVY	0.983875	HLA-A01:01						-0.3	0.93	ATDYHVRYV	0.596813	HLA-A01:01
1zup_BLCL1408_F3	7817											1.2	0.76	LERSRLQSL
1zup_BLCL1408_F3	7819											1	0.88	MPSEKVVm
1zup_BLCL1408_F3	7820						-0.1	0.906332	PGEREAGASLY	0.518856	HLA-A01:01
1zup_BLCL1408_F3	7821											0.3	0.72	LLKGRTVEL
1zup_BLCL1408_F3	7826											0.7	0.77	SLFEKKSL	0.931757	HLA-B08:01
1zup_BLCL1408_F3	7829											5.7	0.76	NPKmRVTL
1zup_BLCL1408_F3	7830	-0.648415	0.8275	SLFEKKSL	0.931757	HLA-B08:01						0.4	0.92	SLFEKKSL	0.931757	HLA-B08:01
1zup_BLCL1408_F3	7832						-0.5	0.902899	QTTQAYGQQSY	0.713694	HLA-A01:01
1zup_BLCL1408_F3	7840											0.8	0.72	LERLHAEL	0.540614	HLA-B08:01
1zup_BLCL1408_F3	7846											-0.3	0.7	TSERGELTSY	0.964364	HLA-A01:01
1zup_BLCL1408_F3	7849	-0.916955	0.878889	DIKSKTYSL	0.995918	HLA-B08:01	0.3	0.961342	DIKSKTYSL	0.995918	HLA-B08:01
1zup_BLCL1408_F3	7851											-0.6	0.7	QPRLKSFL	0.861366	HLA-B08:01
1zup_BLCL1408_F3	7854	1.20569	0.821111	VEPYTKQQL	0.521651	HLA-B08:01	1.2	0.892901	VEPYTKQQL	0.521651	HLA-B08:01
1zup_BLCL1408_F3	7857						0.5	0.938333	DLITRQKQL	0.983641	HLA-B08:01
1zup_BLCL1408_F3	7858	0.388498	0.93125	KPYTKYVL	0.848882	HLA-B08:01	0.2	0.974524	KPYTKYVL	0.848882	HLA-B08:01
1zup_BLCL1408_F3	7862											0.5	0.7	TPMGQKVQSL	0.770341	HLA-B08:01
1zup_BLCL1408_F3	7863						-0.2	0.924755	FSKIRPQL	0.905977	HLA-B08:01
1zup_BLCL1408_F3	7872	-1.36864	0.738889	YLKEYKEAI	0.896347	HLA-B08:01
1zup_BLCL1408_F3	7875											-9.8	0.7	LNKETRVL	0.569662	HLA-B08:01
1zup_BLCL1408_F3	7879											-9.7	0.72	AtDGTFWKRY
1zup_BLCL1408_F3	7880											0.6	0.87	FPLSKKTL	0.930401	HLA-B08:01
1zup_BLCL1408_F3	7882	-0.380464	0.856667	DVmIRKEEL								-1.4	0.83	DVmLRKEEL
1zup_BLCL1408_F3	7890	-0.147368	0.812222	APPMEKPEV	0.521048	HLA-B08:01						-0.1	0.77	APPMEKPDL	0.518402	HLA-B08:01
1zup_BLCL1408_F3	7891											4.2	0.84	LSDTSSKQmTL
1zup_BLCL1408_F3	7894											9.2	0.7	VSDYEPEY	0.849157	HLA-A01:01
1zup_BLCL1408_F3	7903	0.213231	0.941111	EmDSERLQY
1zup_BLCL1408_F3	7907											0.9	0.8	YLKEYKEAL	0.973322	HLA-B08:01
1zup_BLCL1408_F3	7914											-6.5	0.74	LEVHMKmQL
1zup_BLCL1408_F3	7916						0	0.903865	ERLIRTIAA	0.579171	HLA-B08:01
1zup_BLCL1408_F3	7918											-2.4	0.72	HLLSYLSHL	0.623357	HLA-B08:01
1zup_BLCL1408_F3	7919	-0.253838	0.910833	VSDPSSPQYGKY	0.975501	HLA-A01:01	-0.3	0.988655	VSDPSSPQYGKY	0.975501	HLA-A01:01
1zup_BLCL1408_F3	7920	-0.988542	0.770909	ETDEQRLRDEY	0.989279	HLA-A01:01	-0.4	0.9791	ETDEQRLRDEY	0.989279	HLA-A01:01
1zup_BLCL1408_F3	7923						1	0.906332	IAVLKHNL	0.650074	HLA-B08:01
1zup_BLCL1408_F3	7930											-2.7	0.7	HLSEMFLHY	0.838036	HLA-A01:01
1zup_BLCL1408_F3	7936											-7.7	0.77	MLLKAALML	0.515892	HLA-B08:01
1zup_BLCL1408_F3	7937											0	0.86	TVKLNELSL	0.762337	HLA-B08:01
1zup_BLCL1408_F3	7939											-0.5	0.7	LAVLKLNH	0.499724	HLA-A01:01
1zup_BLCL1408_F3	7948	0.288439	0.92625	YTDKImTY
1zup_BLCL1408_F3	7955						0.1	0.932593	VSDPSSPQY	0.995997	HLA-A01:01
1zup_BLCL1408_F3	7956											2.1	0.74	ALVDKLVNT	0.503117	HLA-B08:01
1zup_BLCL1408_F3	7958						0.2	0.959804	VTEIDqDKY
1zup_BLCL1408_F3	7959											-0.3	0.75	MLLKRTEL	0.905127	HLA-B08:01
1zup_BLCL1408_F3	7962											-0.5	0.75	LPLARHAF	0.758457	HLA-B08:01
1zup_BLCL1408_F3	7967											-1.4	0.84	ELLKNKNSL	0.905481	HLA-B08:01
1zup_BLCL1408_F3	7969	0.640655	0.955556	HLDTLTEHY	0.993719	HLA-A01:01
1zup_BLCL1408_F3	7970											-7.6	0.71	TVPGKMVSL	0.720546	HLA-B08:01
1zup_BLCL1408_F3	7971						-0.5	0.907727	SDKYGLGY	0.793167	HLA-A01:01
1zup_BLCL1408_F3	7972						0.8	0.906799	KETYELRY	0.499365	HLA-A01:01
1zup_BLCL1408_F3	7975											-0.2	0.79	LPSEKTASL	0.923113	HLA-B08:01
1zup_BLCL1408_F3	7977											0.5	0.89	LnLTRQKQL
1zup_BLCL1408_F3	7978	-1.10315	0.697	HTDPDYSAAY	0.997268	HLA-A01:01	-0.2	0.952499	HTDPDYSAAY	0.997268	HLA-A01:01
1zup_BLCL1408_F3	7979	0.518919	0.7075	FSKIRPQL	0.905977	HLA-B08:01
1zup_BLCL1408_F3	7981	-0.358263	0.79875	ALKLLSSGL
1zup_BLCL1408_F3	7982											-0.4	0.87	ALKLKESL	0.905976	HLA-B08:01
1zup_BLCL1408_F3	7983											-2.8	0.71	VTELCAQESL	0.505665	HLA-A01:01
1zup_BLCL1408_F3	7990											0.8	0.73	QDRYKSLL
1zup_BLCL1408_F3	8002	0.783916	0.86875	KPYTKYVL	0.848882	HLA-B08:01
1zup_BLCL1408_F3	8004	0.722544	0.877778	VTDSIRDEY	0.997271	HLA-A01:01
1zup_BLCL1408_F3	8008	1.48973	0.794444	SSDRIPSAY	0.993656	HLA-A01:01	0.1	0.933993	SSDRIPSAY	0.993656	HLA-A01:01	0.3	0.85	EPMLHTRL	0.806427	HLA-B08:01
1zup_BLCL1408_F3	8010						-1.6	0.887971	LVNIRKDSL	0.872675	HLA-B08:01
1zup_BLCL1408_F3	8022											-6	0.72	VLDELKMGY
1zup_BLCL1408_F3	8023											1.3	0.74	ELLRKALAA	0.6603	HLA-B08:01
1zup_BLCL1408_F3	8026											-6.1	0.75	YTmERLKY
1zup_BLCL1408_F3	8027											-0.2	0.78	LEREKNLSL	0.769885	HLA-B08:01
1zup_BLCL1408_F3	8028											-2.7	0.84	STDTSLsFSSY
1zup_BLCL1408_F3	8032	0.207923	0.864444	DIKSKIRAL	0.993034	HLA-B08:01						1.3	0.79	DLKSKLLRA	0.753286	HLA-B08:01
1zup_BLCL1408_F3	8033	1.33473	0.941111	DIKSKIRAL	0.993034	HLA-B08:01						0.9	0.94	DLKSKLRAL	0.995957	HLA-B08:01
1zup_BLCL1408_F3	8036											1.4	0.85	TPQFRHVF	0.744709	HLA-B08:01
1zup_BLCL1408_F3	8037											-0.7	0.82	EPMLHTRL	0.806427	HLA-B08:01
1zup_BLCL1408_F3	8038	0.4137	0.727778	SADPDNLKY	0.995467	HLA-A01:01
1zup_BLCL1408_F3	8052	-0.57579	0.724545	ETDEQRLRDEY	0.989279	HLA-A01:01
1zup_BLCL1408_F3	8054											-7.7	0.82	MLLKAALML	0.515892	HLA-B08:01
1zup_BLCL1408_F3	8055											0	0.9	LSKLNELSL	0.595563	HLA-B08:01
1zup_BLCL1408_F3	8056											-9.5	0.77	NPYSKETV
1zup_BLCL1408_F3	8058	-0.290196	0.941667	YSEQPDFSGHKY	0.994194	HLA-A01:01
1zup_BLCL1408_F3	8060						0.5	0.889308	ATDMPVKNqY
1zup_BLCL1408_F3	8061											-2.8	0.84	KNCVRHLL	0.512266	HLA-B08:01
1zup_BLCL1408_F3	8065	1.04999	0.93375	YTDKImTY
1zup_BLCL1408_F3	8067	-0.0929202	0.784545	LADHTVHVLRY	0.928674	HLA-A01:01	-0.5	0.975351	LADHTVHVLRY	0.928674	HLA-A01:01
1zup_BLCL1408_F3	8068	-0.400533	0.954615	VSDPSPNTDPAKY	0.96469	HLA-A01:01	-0.7	0.984439	VSDPSPNTDPAKY	0.96469	HLA-A01:01
1zup_BLCL1408_F3	8082											-4.4	0.7	MLLKWTVL	0.556618	HLA-B08:01
1zup_BLCL1408_F3	8087	0.286213	0.902222	HLDTLTEHY	0.993719	HLA-A01:01
1zup_BLCL1408_F3	8089											-0.2	0.83	LPSEKTASL	0.923113	HLA-B08:01
1zup_BLCL1408_F3	8091	1.21615	0.8725	SVKYHYEL	0.805004	HLA-B08:01						0.4	0.93	SVKYHYEL	0.805004	HLA-B08:01
1zup_BLCL1408_F3	8093	1.41981	0.871667	YSSSRYDDYDRY	0.910212	HLA-A01:01	0.7	0.985477	YSSSRYDDYDRY	0.910212	HLA-A01:01
1zup_BLCL1408_F3	8094											8.1	0.71	TGDKmDASVY
1zup_BLCL1408_F3	8098						1.6	0.977472	VSDSKQFTY	0.997841	HLA-A01:01
1zup_BLCL1408_F3	8105											-1.5	0.7	LPLEKRAL	0.895985	HLA-B08:01
1zup_BLCL1408_F3	8109						-0.2	0.971928	STDTSGYGQSSY	0.993375	HLA-A01:01
1zup_BLCL1408_F3	8115											2.5	0.71	LLVCFSLVL	0.500791	HLA-B08:01
1zup_BLCL1408_F3	8116	-0.0152108	0.821111	LLKQKMDEL	0.922999	HLA-B08:01	-0.7	0.946282	LLKQKMDEL	0.922999	HLA-B08:01
1zup_BLCL1408_F3	8118											3.8	0.83	LLDDmNHCtT
1zup_BLCL1408_F3	8120	0.722544	0.805556	VTDSIRDEY	0.997271	HLA-A01:01	1.4	0.967451	VTDSIRDEY	0.997271	HLA-A01:01
1zup_BLCL1408_F3	8123	0.748215	0.856667	HADVSNQLY	0.992437	HLA-A01:01	0.9	0.884097	HADVSNQLY	0.992437	HLA-A01:01
1zup_BLCL1408_F3	8124											0.4	0.77	SWnPHTKL
1zup_BLCL1408_F3	8126	-0.0616046	0.808889	HVITKTmEL			2	0.903672	HVITKTmEL
1zup_BLCL1408_F3	8127						-1.6	0.971928	HLDPSQRALY	0.992422	HLA-A01:01
1zup_BLCL1408_F3	8133											9	0.71	LVNLTGQLSL	0.502963	HLA-B08:01
1zup_BLCL1408_F3	8140											0.1	0.85	LLKEKYGL	0.834993	HLA-B08:01
1zup_BLCL1408_F3	8142											-7.3	0.89	STDTSGYYMSY	0.996492	HLA-A01:01
1zup_BLCL1408_F3	8143	1.83642	0.573	HLDPSQRALY	0.992422	HLA-A01:01
1zup_BLCL1408_F3	8144	0.528578	0.725	HIDKVDSNDSLY	0.965229	HLA-A01:01	-0.1	0.983576	HIDKVDSNDSLY	0.965229	HLA-A01:01
1zup_BLCL1408_F3	8146	-0.844872	0.851667	PTDNPEAHSNLY	0.975905	HLA-A01:01	-1.3	0.994235	PTDNPEAHSNLY	0.975905	HLA-A01:01
1zup_BLCL1408_F3	8151	-1.29359	0.8525	LTDKAVKDYSAY	0.957214	HLA-A01:01	-1.4	0.989527	LTDKAVKDYSAY	0.957214	HLA-A01:01
1zup_BLCL1408_F3	8153	-0.366979	0.852222	DIKSKIRAL	0.993034	HLA-B08:01						1.3	0.71	DLKSKLRAL	0.995957	HLA-B08:01
1zup_BLCL1408_F3	8154	1.39172	0.935556	SADPDNLKY	0.995467	HLA-A01:01	0.5	0.957233	SADPDNLKY	0.995467	HLA-A01:01
1zup_BLCL1408_F3	8156	0.786684	0.86	HVITKTMEL	0.927093	HLA-B08:01	0.4	0.98433	HVITKTMEL	0.927093	HLA-B08:01
1zup_BLCL1408_F3	8157	0.759828	0.946667	DIKSKIRAL	0.993034	HLA-B08:01						0.9	0.88	DLKSKLRAL	0.995957	HLA-B08:01
1zup_BLCL1408_F3	8158	-0.11247	0.8525	DAISKSEL	0.735065	HLA-B08:01
1zup_BLCL1408_F3	8159	0.114076	0.793333	LPNAKIKEL	0.923638	HLA-B08:01	-0.3	0.880328	LPNAKIKEL	0.923638	HLA-B08:01
1zup_BLCL1408_F3	8160											0	0.77	YGDLKRAL	0.617136	HLA-B08:01
1zup_BLCL1408_F3	8162	-0.0356996	0.932	YTETEPYHNY	0.995881	HLA-A01:01
1zup_BLCL1408_F3	8169	-0.533746	0.952727	PHACYSTVFDK	0.499906	HLA-A01:01						0.1	0.95	PHACGYSTVFDK	0.4997	HLA-A01:01
1zup_BLCL1408_F3	8170											0.1	0.7	AVRLRPEL	0.845621	HLA-B08:01
1zup_BLCL1408_F3	8173	0.28297	0.9075	VPMEKVKL	0.867607	HLA-B08:01	0.1	0.942731	VPMEKVKL	0.867607	HLA-B08:01
1zup_BLCL1408_F3	8180	-1.34414	0.836364	EVDSGRQIEY	0.931968	HLA-A01:01
1zup_BLCL1408_F3	8182	-1.23738	0.793333	YSSSRYDDYDRY	0.910212	HLA-A01:01
1zup_BLCL1408_F3	8186	0.318556	0.788462	VSDPSPNTDPAKY	0.96469	HLA-A01:01
1zup_BLCL1408_F3	8188											0.5	0.77	HYKVSYEL	0.556438	HLA-B08:01
1zup_BLCL1408_F3	8193	-0.346757	0.857778	YLDYHmEKY
1zup_BLCL1408_F3	8199	0.479271	0.731111	TVLKRAVEL	0.940516	HLA-B08:01
1zup_BLCL1408_F3	8200	1.13312	0.848889	YVLKKAQVL	0.956933	HLA-B08:01	0.9	0.961342	YVLKKAQVL	0.956933	HLA-B08:01
1zup_BLCL1408_F3	8205	7.93988	0.689	FTDELRQRY	0.998713	HLA-A01:01	-0.1	0.907449	FTDELRQRY	0.998713	HLA-A01:01
1zup_BLCL1408_F3	8209	0.692076	0.772	GTDGGRYDVY	0.975394	HLA-A01:01	1	0.968852	GTDGGRYDVY	0.975394	HLA-A01:01
1zup_BLCL1408_F3	8211	1.21615	0.93125	SVKYHYEL	0.805004	HLA-B08:01						0.4	0.85	SVKYHYEL	0.805004	HLA-B08:01
1zup_BLCL1408_F3	8214	0.270435	0.86	YGDLRKAL	0.620755	HLA-B08:01						0	0.9	YGDLRKAL	0.620755	HLA-B08:01
1zup_BLCL1408_F3	8232	0.427876	0.884444	EIKSKLASL	0.992034	HLA-B08:01	0.1	0.935816	EIKSKLASL	0.992034	HLA-B08:01
1zup_BLCL1408_F3	8235						-0.2	0.95531	TTDSSYGqNY
1zup_BLCL1408_F3	8238	0.151867	0.7925	RSEDPDTSMDSY	0.887748	HLA-A01:01	0.8	0.979677	RSEDPDTSMDSY	0.887748	HLA-A01:01
1zup_BLCL1408_F3	8239	1.13335	0.824545	GTDGQGGTFRY	0.992138	HLA-A01:01	-0.2	0.965265	GTDGQGGTFRY	0.992138	HLA-A01:01
1zup_BLCL1408_F3	8244											0.7	0.71	LLRGSVLGL	0.544282	HLA-B08:01
1zup_BLCL1408_F3	8248	-0.463889	0.819091	NTSDMmGRMSY
1zup_BLCL1408_F3	8250	0.0342175	0.86	YAMENHSL	0.701084	HLA-B08:01	-0.3	0.896584	YAMENHSL	0.701084	HLA-B08:01
1zup_BLCL1408_F3	8259	0.493067	0.945	ELVKKYSL	0.943067	HLA-B08:01	1	0.941982	ELVKKYSL	0.943067	HLA-B08:01
1zup_BLCL1408_F3	8263	-0.697554	0.708333	PTDNPEAHSNLY	0.975905	HLA-A01:01
1zup_BLCL1408_F3	8265											-0.2	0.72	LLERKVGL	0.585992	HLA-B08:01
1zup_BLCL1408_F3	8272	-1.27612	0.78125	QPPYRTSL	0.746529	HLA-B08:01						0.5	0.73	QPPYRTSL	0.746529	HLA-B08:01
1zup_BLCL1408_F3	8274	-0.0356996	0.917	YTETEPYHNY	0.995881	HLA-A01:01	0.3	0.983933	YTETEPYHNY	0.995881	HLA-A01:01
1zup_BLCL1408_F3	8276	0.973323	0.927778	HVITKTMEL	0.927093	HLA-B08:01
1zup_BLCL1408_F3	8278											-3.2	0.77	DLKLYCKL
1zup_BLCL1408_F3	8286											-0.1	0.73	EAFPLRAR
1zup_BLCL1408_F3	8287	-1.76026	0.765	RSEDPDTSmDSY			-1.6	0.980396	RSEDPDTSmDSY
1zup_BLCL1408_F3	8288											-0.5	0.7	EVMKQLRSL	0.873921	HLA-B08:01
1zup_BLCL1408_F3	8289	1.32758	0.768889	ELHQRDITI	0.80096	HLA-B08:01	-0.2	0.945415	ELHQRDITI	0.80096	HLA-B08:01
1zup_BLCL1408_F3	8292	0.286213	0.925556	HLDTLTEHY	0.993719	HLA-A01:01	0.6	0.985835	HLDTLTEHY	0.993719	HLA-A01:01
1zup_BLCL1408_F3	8293	-0.884936	0.734444	ELYERAREL	0.971091	HLA-B08:01						-7.5	0.86	ELYERPMKL	0.981198	HLA-B08:01
1zup_BLCL1408_F3	8296	-0.516077	0.861	EVDSGRQIEY	0.931968	HLA-A01:01	0.6	0.958414	EVDSGRQIEY	0.931968	HLA-A01:01
1zup_BLCL1408_F3	8298											0.9	0.82	TEERLESDY
1zup_BLCL1408_F3	8311	0.0371255	0.658889	IPLDKRLAA	0.711426	HLA-B08:01						-0.2	0.76	LPLDKRAAL	0.928045	HLA-B08:01
1zup_BLCL1408_F3	8313	0.150761	0.688889	LTDDEKTYY	0.99929	HLA-A01:01	-0.2	0.948388	LTDDEKTYY	0.99929	HLA-A01:01
1zup_BLCL1408_F3	8314	1.05583	0.964444	ELFQKAKSL	0.980891	HLA-B08:01	0.9	0.961956	ELFQKAKSL	0.980891	HLA-B08:01
1zup_BLCL1408_F3	8315											8.8	0.77	LEYERnLQL
1zup_BLCL1408_F3	8319											2.8	0.74	TVmDSMEHY
1zup_BLCL1408_F3	8321	1.3519	0.86	IGKMRYVSV	0.815467	HLA-B08:01	0.7	0.976459	IGKMRYVSV	0.815467	HLA-B08:01
1zup_BLCL1408_F3	8322						0.2	0.90558	LSDRTNLY	0.937685	HLA-A01:01
1zup_BLCL1408_F3	8323											0.7	0.75	SPTRLNSSL	0.596356	HLA-B08:01
1zup_BLCL1408_F3	8325											0.3	0.73	LPKARPmSL
1zup_BLCL1408_F3	8336											0.2	0.72	LERKVVQSL	0.636795	HLA-B08:01
1zup_BLCL1408_F3	8347	-1.57589	0.72	YTAQTSQPTNY	0.894033	HLA-A01:01
1zup_BLCL1408_F3	8348											3.2	0.76	ELQERLRQL	0.970514	HLA-B08:01
1zup_BLCL1408_F3	8349											-3.6	0.8	TTnYSLEsY
1zup_BLCL1408_F3	8353											-7.4	0.73	TEALYGYYR
1zup_BLCL1408_F3	8355						-1.9	0.921527	FVHLKPQV	0.681313	HLA-B08:01
1zup_BLCL1408_F3	8357	-0.561124	0.799167	RSEDPDTSMDSY	0.887748	HLA-A01:01
1zup_BLCL1408_F3	8359											-0.8	0.8	ETYGDMADCnCEK
1zup_BLCL1408_F3	8363	-0.922429	0.83	NTSDMmGRMSY			0.1	0.960284	NTSDMmGRMSY
1zup_BLCL1408_F3	8364											-1.3	0.81	DPNFKDRL	0.55865	HLA-B08:01
1zup_BLCL1408_F3	8365						0.6	0.952924	QSnETALHY
1zup_BLCL1408_F3	8367						-0.6	0.908918	RLYPRVQAM	0.952234	HLA-B08:01
1zup_BLCL1408_F3	8371											0.1	0.79	nPNFKDRL
1zup_BLCL1408_F3	8376						1	0.901726	IVADHVASY	0.74503	HLA-A01:01
1zup_BLCL1408_F3	8377											0.6	0.83	YTDVSREY	0.961551	HLA-A01:01
1zup_BLCL1408_F3	8382						1.1	0.879968	GKMRYVSV	0.476966	HLA-B08:01
1zup_BLCL1408_F3	8384											0.2	0.86	LPKARPMSL	0.991726	HLA-B08:01
1zup_BLCL1408_F3	8386	-0.115241	0.785	YNFPKKAL	0.810432	HLA-B08:01
1zup_BLCL1408_F3	8390											8.7	0.74	LSmSKFRL
1zup_BLCL1408_F3	8395	-1.09909	0.922	YTETEPYHNY	0.995881	HLA-A01:01
1zup_BLCL1408_F3	8397	-0.356063	0.8975	ISDLAQHY	0.881939	HLA-A01:01	-0.9	0.91249	ISDLAQHY	0.881939	HLA-A01:01
1zup_BLCL1408_F3	8399											-1.9	0.75	FLEQGPELFL	0.530153	HLA-A01:01
1zup_BLCL1408_F3	8400											-1.7	0.8	FSLTKKTL	0.711781	HLA-B08:01
1zup_BLCL1408_F3	8407	-0.375864	0.673333	ELYERAREL	0.971091	HLA-B08:01						8.3	0.86	ELYLENREL	0.608523	HLA-B08:01
1zup_BLCL1408_F3	8409											0	0.82	NAKLRVDEL	0.960994	HLA-B08:01
1zup_BLCL1408_F3	8411						0.8	0.896066	ELKNKELTL	0.985807	HLA-B08:01
1zup_BLCL1408_F3	8418	-0.514678	0.88	LPSLKKTL	0.879739	HLA-B08:01						0	0.87	LPSLKKTL	0.879739	HLA-B08:01
1zup_BLCL1408_F3	8420											0.1	0.92	SYDGTmHKY
1zup_BLCL1408_F3	8421	0.14006	0.909167	STDVDKTGASYY	0.99369	HLA-A01:01	0.1	0.992509	STDVDKTGASYY	0.99369	HLA-A01:01
1zup_BLCL1408_F3	8422	-0.63569	0.951	HSDLLEDSKY	0.985374	HLA-A01:01	-1.7	0.988414	HSDLLEDSKY	0.985374	HLA-A01:01
1zup_BLCL1408_F3	8423	0.108991	0.918889	HLDTLTEHY	0.993719	HLA-A01:01
1zup_BLCL1408_F3	8425											5.5	0.76	YnEGYYKFY
1zup_BLCL1408_F3	8429						-0.7	0.929771	ELYERAREL	0.971091	HLA-B08:01
1zup_BLCL1408_F3	8431	0.948964	0.855556	IIDGKTLKY	0.990559	HLA-A01:01
1zup_BLCL1408_F3	8432						0.1	0.957701	IIDGKTLKY	0.990559	HLA-A01:01
1zup_BLCL1408_F3	8433						0.8	0.968063	YTAQPTQGY	0.97967	HLA-A01:01
1zup_BLCL1408_F3	8434	-0.178127	0.8625	IDGKTLKY	0.746409	HLA-A01:01	0.2	0.930331	IDGKTLKY	0.746409	HLA-A01:01
1zup_BLCL1408_F3	8436											1.4	0.74	FPNLKVSR	0.514869	HLA-B08:01
1zup_BLCL1408_F3	8437											0.3	0.8	TAYLRVKV	0.596101	HLA-B08:01
1zup_BLCL1408_F3	8448											-0.3	0.79	YLnSPSLK
1zup_BLCL1408_F3	8452	0.254747	0.71	EIRKVVQSL	0.926941	HLA-B08:01						0.2	0.74	LERKVVQSL	0.636795	HLA-B08:01
1zup_BLCL1408_F3	8456	2.00192	0.94	YNFPKKAL	0.810432	HLA-B08:01	1	0.961688	YNFPKKAL	0.810432	HLA-B08:01
1zup_BLCL1408_F3	8457	-2.92249	0.8	YAAVKIHQL	0.944022	HLA-B08:01						-4.2	0.75	FSAVKHLQL	0.788476	HLA-B08:01
1zup_BLCL1408_F3	8462	0.589461	0.958	MMDPDSTQRY	0.991256	HLA-A01:01	-0.6	0.94459	MMDPnSTQRY
1zup_BLCL1408_F3	8463	-1.82788	0.93	DGKTLKY			1.1	0.958787	DGKTLKY
1zup_BLCL1408_F3	8469						0.7	0.944424	YSEGYPGqRY
1zup_BLCL1408_F3	8474											-0.8	0.75	ETYGDMADCnCEK
1zup_BLCL1408_F3	8475	0.737221	0.772	ETEREYFNRY	0.958651	HLA-A01:01
1zup_BLCL1408_F3	8477						0.3	0.940691	VALQRAAEM	0.72936	HLA-B08:01
1zup_BLCL1408_F3	8478											-0.2	0.7	LPHLKSTTL	0.981282	HLA-B08:01
1zup_BLCL1408_F3	8480						-0.1	0.930122	NPTERVAAL	0.912258	HLA-B08:01
1zup_BLCL1408_F3	8487											-2.7	0.79	VTEYNAQY	0.827722	HLA-A01:01
1zup_BLCL1408_F3	8491	-0.843859	0.959	ETEREYFNRY	0.958651	HLA-A01:01
1zup_BLCL1408_F3	8499											-4.3	0.75	DLLDLAELNL	0.505443	HLA-A01:01
1zup_BLCL1408_F3	8503											-0.6	0.7	ELLLKHSL	0.951604	HLA-B08:01
1zup_BLCL1408_F3	8505	-0.727138	0.8525	YNFPKKAL	0.810432	HLA-B08:01
1zup_BLCL1408_F3	8509	-1.25664	0.9525	FGMKKPPL	0.768403	HLA-B08:01	-2.4	0.979287	FGMKKPPL	0.768403	HLA-B08:01
1zup_BLCL1408_F3	8521											9.5	0.76	VPYGKLTLV	0.667479	HLA-B08:01
1zup_BLCL1408_F3	8522											0.3	0.79	ELLLKHTV	0.685846	HLA-B08:01
1zup_BLCL1408_F3	8523						-1.6	0.970282	YVDRTGDVQTASY	0.951563	HLA-A01:01
1zup_BLCL1408_F3	8525	0.475544	0.715	VMKIKAEI	0.668876	HLA-B08:01						0.2	0.7	VMKLKAEL	0.904972	HLA-B08:01
1zup_BLCL1408_F3	8533	-0.0350533	0.798889	TTDTVIRSY	0.992293	HLA-A01:01	0.7	0.944424	TTDTVIRSY	0.992293	HLA-A01:01
1zup_BLCL1408_F3	8538	-0.472225	0.924167	STDVDKTGASYY	0.99369	HLA-A01:01
1zup_BLCL1408_F3	8539	1.2632	0.762222	FPPKPKDTL	0.68282	HLA-B08:01
1zup_BLCL1408_F3	8540											0	0.91	LPSLKKTL	0.879739	HLA-B08:01
1zup_BLCL1408_F3	8541						0.4	0.904821	KIDEPSTPY	0.87895	HLA-A01:01
1zup_BLCL1408_F3	8543	-0.496603	0.907778	EIKQKFSEL	0.992591	HLA-B08:01						-9.9	0.75	KNKQKFSEL	0.847521	HLA-B08:01
1zup_BLCL1408_F3	8547											1.6	0.81	ELYKKYAL	0.963307	HLA-B08:01
1zup_BLCL1408_F3	8549	-0.764311	0.921111	IIDGKTLKY	0.990559	HLA-A01:01
1zup_BLCL1408_F3	8550	-0.421329	0.811	QLDSAQKNLY	0.981194	HLA-A01:01
1zup_BLCL1408_F3	8553						-0.6	0.94885	ISSSPTHSLY	0.932669	HLA-A01:01
1zup_BLCL1408_F3	8554	0.16567	0.818889	EVLERKISM	0.958642	HLA-B08:01	0.8	0.959401	EVLERKISM	0.958642	HLA-B08:01
1zup_BLCL1408_F3	8562						-0.3	0.882932	YIDSPSLK	0.589083	HLA-A01:01
1zup_BLCL1408_F3	8563	-0.0388249	0.88	FTEPNRHFY	0.997694	HLA-A01:01	-0.1	0.977154	FTEPNRHFY	0.997694	HLA-A01:01
1zup_BLCL1408_F3	8564	1.42368	0.777778	TPHLRNLAV	0.889632	HLA-B08:01						8.7	0.84	QAHLARQVV
1zup_BLCL1408_F3	8565											-3.9	0.83	YSDLGDHTTCFGY	0.980745	HLA-A01:01
1zup_BLCL1408_F3	8574	-0.0530265	0.907	NSEEMKEAYY	0.963427	HLA-A01:01	-0.5	0.990786	NSEEMKEAYY	0.963427	HLA-A01:01
1zup_BLCL1408_F3	8576	0.0489602	0.946667	ESDINSVRY	0.994214	HLA-A01:01	1.3	0.913965	ESDINSVRY	0.994214	HLA-A01:01
1zup_BLCL1408_F3	8577	3.41654	0.914545	ETAMVTADSKY	0.731517	HLA-A01:01	1.5	0.974928	ETAMVTADSKY	0.731517	HLA-A01:01
1zup_BLCL1408_F3	8579											-1.1	0.71	FPPKQELAL	0.69436	HLA-B08:01
1zup_BLCL1408_F3	8580	1.2037	0.958	YVDEEGNLVK	0.713169	HLA-A01:01	1.2	0.928353	YVDEEGNLVK	0.713169	HLA-A01:01
1zup_BLCL1408_F3	8586	-1.17319	0.94125	DLVVKKEL	0.849102	HLA-B08:01						-0.3	0.92	DLVVKKEL	0.849102	HLA-B08:01
1zup_BLCL1408_F3	8597						0.2	0.895126	DLNKRVqDL
1zup_BLCL1408_F3	8598						0	0.893966	ESDIKVNGY	0.979738	HLA-A01:01
1zup_BLCL1408_F3	8599	-1.07619	0.851	NSEEmKEAYY			-0.5	0.987881	NSEEmKEAYY
1zup_BLCL1408_F3	8605	-0.843859	0.955	ETEREYFNRY	0.958651	HLA-A01:01	-0.6	0.991787	ETEREYFNRY	0.958651	HLA-A01:01
1zup_BLCL1408_F3	8606											7.6	0.77	YPMPTWPV	0.536007	HLA-B08:01
1zup_BLCL1408_F3	8607						-0.6	0.918488	RTEDTAVYY	0.992619	HLA-A01:01
1zup_BLCL1408_F3	8610	0.903972	0.857778	LSDKNIEQY	0.995725	HLA-A01:01	1.8	0.955533	LSDKNIEQY	0.995725	HLA-A01:01
1zup_BLCL1408_F3	8611											-0.9	0.72	LPQTRRLSL	0.95904	HLA-B08:01
1zup_BLCL1408_F3	8612											0.2	0.89	SGYGRSVSL	0.92382	HLA-B08:01
1zup_BLCL1408_F3	8619						-0.5	0.938024	IQRTPKIQVY	0.521154	HLA-A01:01
1zup_BLCL1408_F3	8620	0.8469	0.870909	ETAmVTADSKY			0.7	0.941516	ETAmVTADSKY
1zup_BLCL1408_F3	8623											4.5	0.72	TVHVSNPmY
1zup_BLCL1408_F3	8627						-0.8	0.969742	RTSPYSSnGTSVY
1zup_BLCL1408_F3	8630											-0.8	0.79	LPGARSSPL	0.725984	HLA-B08:01
1zup_BLCL1408_F3	8631	0.336974	0.914444	VANLRGESL	0.874069	HLA-B08:01						0.7	0.79	VANLREGSL	0.749076	HLA-B08:01
1zup_BLCL1408_F3	8633											5	0.7	LALREMKAT	0.499484	HLA-A01:01
1zup_BLCL1408_F3	8634											-0.2	0.83	YSYVREPRL	0.683707	HLA-B08:01
1zup_BLCL1408_F3	8643											-3.9	0.73	LSDYMVEQY	0.996316	HLA-A01:01
1zup_BLCL1408_F3	8651											1.3	0.76	ESnLNAEYR
1zup_BLCL1408_F3	8655	-1.53395	0.917	TSDDVKEQIY	0.991963	HLA-A01:01	-0.6	0.990505	TSDDVKEQIY	0.991963	HLA-A01:01
1zup_BLCL1408_F3	8656											-5	0.72	LSDYDMQYL	0.734281	HLA-A01:01
1zup_BLCL1408_F3	8659	0.11222	0.762222	FPPKPKDTL	0.68282	HLA-B08:01
1zup_BLCL1408_F3	8662	-0.432665	0.96375	PDATSLKY	0.552361	HLA-A01:01	0.5	0.971816	PDATSLKY	0.552361	HLA-A01:01
1zup_BLCL1408_F3	8665	-0.379434	0.874444	LSDKNIEQY	0.995725	HLA-A01:01
1zup_BLCL1408_F3	8667	0.703956	0.947778	GSDDTELRY	0.994694	HLA-A01:01	0.9	0.95522	GSDDTELRY	0.994694	HLA-A01:01
1zup_BLCL1408_F3	8668											-8.7	0.71	SENSVMFAL	0.518952	HLA-B08:01
1zup_BLCL1408_F3	8671	-0.764311	0.886667	IIDGKTLKY	0.990559	HLA-A01:01
1zup_BLCL1408_F3	8673											2.2	0.7	DLLFnPVEEL
1zup_BLCL1408_F3	8675											-0.7	0.82	EVLLRKTL	0.918205	HLA-B08:01
1zup_BLCL1408_F3	8676											-1.3	0.78	TCMnTAQKNLY
1zup_BLCL1408_F3	8678	-1.22109	0.732222	ESDIKVNGY	0.979738	HLA-A01:01
1zup_BLCL1408_F3	8681	0.665998	0.96125	NTDSPLRY	0.966785	HLA-A01:01	0.5	0.901333	NTDSPLRY	0.966785	HLA-A01:01
1zup_BLCL1408_F3	8685											-2.8	0.74	SVtSLKDY
1zup_BLCL1408_F3	8686	-1.35855	0.960714	ECCHGDLLECADDR	0.371483	HLA-A01:01						-0.8	0.89	ECGGCHGDLLEGCADDR	0.002316	HLA-A01:01
1zup_BLCL1408_F3	8687											2	0.77	ESDLLsVGY
1zup_BLCL1408_F3	8688											-1.4	0.78	YPNVMQR
1zup_BLCL1408_F3	8693	-1.16104	0.921	NSEEMKEAYY	0.963427	HLA-A01:01
1zup_BLCL1408_F3	8696						0.2	0.932525	KTEPSIAEY	0.981779	HLA-A01:01
1zup_BLCL1408_F3	8697	0.0450516	0.9525	EmFPKTSV
1zup_BLCL1408_F3	8698											0.6	0.72	QHnLMPPQY
1zup_BLCL1408_F3	8699	-0.00671403	0.651111	FPPKPKDTL	0.68282	HLA-B08:01
1zup_BLCL1408_F3	8700	-2.09083	0.66375	ELDVKHAL	0.692985	HLA-B08:01						-0.8	0.85	ELDVKHAL	0.692985	HLA-B08:01
1zup_BLCL1408_F3	8709											-0.3	0.84	DPLKVRVV	0.53533	HLA-B08:01
1zup_BLCL1408_F3	8711	-0.460655	0.88625	LPSTKPQL	0.799113	HLA-B08:01						0.5	0.88	LPSTKPQL	0.799113	HLA-B08:01
1zup_BLCL1408_F3	8717											2.8	0.78	KLEKQENK	0.500215	HLA-A01:01
1zup_BLCL1408_F3	8718						1.5	0.879125	EYKERIAAL	0.929627	HLA-B08:01
1zup_BLCL1408_F3	8730											0.8	0.77	TVPDLHANAL	0.524298	HLA-C07:01
1zup_BLCL1408_F3	8732											1.2	0.79	LPSRKASLL	0.810428	HLA-B08:01
1zup_BLCL1408_F3	8739	-1.4678	0.9125	ELDVKHAL	0.692985	HLA-B08:01
1zup_BLCL1408_F3	8740											4.9	0.74	TVLPMSLSL	0.624735	HLA-C07:01
1zup_BLCL1408_F3	8747											-9.1	0.73	LPGCKGLPL	0.603559	HLA-B08:01
1zup_BLCL1408_F3	8748											-0.2	0.81	YSYVREPRL	0.683707	HLA-B08:01
1zup_BLCL1408_F3	8752						-0.4	0.889197	RVDGRMLQY	0.971569	HLA-A01:01
1zup_BLCL1408_F3	8753											0.8	0.74	LFRTREPAL
1zup_BLCL1408_F3	8756						1.1	0.908553	RAEDTAVYY	0.923561	HLA-A01:01
1zup_BLCL1408_F3	8758											-1.5	0.86	LPSLRKASL	0.971704	HLA-B08:01
1zup_BLCL1408_F3	8762	0.429239	0.93125	mSDVNLKY			1.8	0.886845	mSDVNLKY
1zup_BLCL1408_F3	8769	-0.197902	0.864	TSDDVKEQIY	0.991963	HLA-A01:01
1zup_BLCL1408_F3	8770	0.769863	0.87	ECCHGDLLECADDR	0.371483	HLA-A01:01
1zup_BLCL1408_F3	8775	-0.0247108	0.913333	YLLEKSRAI	0.879779	HLA-B08:01	1.2	0.946763	YLLEKSRAI	0.879779	HLA-B08:01
1zup_BLCL1408_F3	8777											-4.8	0.74	NTDSPFWL	0.629115	HLA-A01:01
1zup_BLCL1408_F3	8788											0.2	0.73	QGYGRVNVV
1zup_BLCL1408_F3	8789						-0.5	0.967581	HTEQLVQDQY	0.986065	HLA-A01:01
1zup_BLCL1408_F3	8794											-4.4	0.88	FYMRPKEL
1zup_BLCL1408_F3	8796	-0.138218	0.83375	YLDVKQRL	0.590156	HLA-B08:01						0	0.75	YLDVKQRL	0.590156	HLA-B08:01
1zup_BLCL1408_F3	8798						1	0.886505	mTERQDLVY
1zup_BLCL1408_F3	8799	-1.34687	0.759444	GGGGGGGLGSGGSIRSSY	0.468191	HLA-A01:01	-1.7	0.989652	GGGGGGGLGSGGSIRSSY	0.468191	HLA-A01:01
1zup_BLCL1408_F3	8803	-0.162615	0.94375	NTDSPLRY	0.966785	HLA-A01:01
1zup_BLCL1408_F3	8804											-1.4	0.72	YPNVRQM
1zup_BLCL1408_F3	8813											0.6	0.71	QHnLMPPQY
1zup_BLCL1408_F3	8814						0	0.985109	DLRIKTSDV	0.879466	HLA-B08:01
1zup_BLCL1408_F3	8816	-3.3262	0.687778	FTAERSSYY	0.98731	HLA-A01:01	-0.2	0.974903	FTAERSSYY	0.98731	HLA-A01:01
1zup_BLCL1408_F3	8817											1	0.85	LPAPKESL	0.736706	HLA-B08:01
1zup_BLCL1408_F3	8818											-0.5	0.8	APHYKRTV
1zup_BLCL1408_F3	8822						0.4	0.964457	LLETSADNQHY	0.860439	HLA-A01:01
1zup_BLCL1408_F3	8825											0.8	0.7	LEGPGVHQL	0.507874	HLA-C07:01
1zup_BLCL1408_F3	8826											6.1	0.7	LPELLLPVY	0.527132	HLA-A01:01
1zup_BLCL1408_F3	8827						1.9	0.954041	DLAAREHVL	0.935841	HLA-B08:01
1zup_BLCL1408_F3	8831	-0.0834699	0.96875	AEFVEVTK	0.500058	HLA-A01:01
1zup_BLCL1408_F3	8832											-2.9	0.71	VTDPDSGDEEWY	0.984996	HLA-A01:01
1zup_BLCL1408_F3	8837	0.719476	0.747	GSDKINYTY	0.988448	HLA-A01:01
1zup_BLCL1408_F3	8838	0.903972	0.937778	LSDKNIEQY	0.995725	HLA-A01:01
1zup_BLCL1408_F3	8840	-1.27681	0.671111	EImEKRYNL
1zup_BLCL1408_F3	8851						0.2	0.950856	RIDTRNELESY	0.828151	HLA-A01:01
1zup_BLCL1408_F3	8853						0.9	0.924453	DVKPHNVMI	0.764575	HLA-B08:01
1zup_BLCL1408_F3	8857											0.9	0.8	TVLSANRSL	0.531779	HLA-C07:01
1zup_BLCL1408_F3	8860	0.640055	0.96875	LTDSSLKY	0.971634	HLA-A01:01						0.3	0.97	LTnSSLKY
1zup_BLCL1408_F3	8861	-0.445489	0.742222	STEERTFQY	0.997814	HLA-A01:01						0.1	0.8	TSEERTFGAY	0.972948	HLA-A01:01
1zup_BLCL1408_F3	8869											-0.8	0.8	LPGGRTSPL	0.70276	HLA-B08:01
1zup_BLCL1408_F3	8874	0.524792	0.90125	QPYTKEVL	0.786242	HLA-B08:01
1zup_BLCL1408_F3	8876						0.3	0.933596	STDTSGYGqSSY
1zup_BLCL1408_F3	8880											-1.5	0.81	LPSLRKASL	0.971704	HLA-B08:01
1zup_BLCL1408_F3	8881	-0.00708122	0.862222	EGIVKQDSL	0.747869	HLA-B08:01
1zup_BLCL1408_F3	8883						0.3	0.91161	DLKSRNVVI	0.957995	HLA-B08:01
1zup_BLCL1408_F3	8886	-0.913546	0.945	SADYIGGSHY	0.948729	HLA-A01:01						0.1	0.85	TGDYLNSHY	0.905031	HLA-A01:01
1zup_BLCL1408_F3	8894						0.6	0.967903	DAMKRVEEI	0.818333	HLA-B08:01
1zup_BLCL1408_F3	8895	0.967617	0.88	LVEKSQLGY	0.963506	HLA-A01:01	0.9	0.922618	LVEKSQLGY	0.963506	HLA-A01:01
1zup_BLCL1408_F3	8899	0.456723	0.881111	DMLEKHATL	0.979483	HLA-B08:01						-0.5	0.86	MnLEKHATL
1zup_BLCL1408_F3	8905	0.644344	0.865556	DAmKRVEEI			0.8	0.918894	DAmKRVEEI
1zup_BLCL1408_F3	8908											-0.6	0.83	LVnTmTEKY
1zup_BLCL1408_F3	8912	0.441717	0.85	YLDVKQRL	0.590156	HLA-B08:01						0	0.81	YLnVKQRL
1zup_BLCL1408_F3	8919	-0.0818751	0.856667	FLQQKAQSL	0.971349	HLA-B08:01	0.8	0.973137	FLQQKAQSL	0.971349	HLA-B08:01
1zup_BLCL1408_F3	8921						1.9	0.926832	VSEIKSSYY	0.987813	HLA-A01:01
1zup_BLCL1408_F3	8923	0.25407	0.659	VTDPEKLNNY	0.993244	HLA-A01:01	0.3	0.918732	VTDPEKLNNY	0.993244	HLA-A01:01
1zup_BLCL1408_F3	8924											-0.4	0.72	DLRNHVNF	0.688139	HLA-B08:01
1zup_BLCL1408_F3	8925	0.251691	0.94375	NTDSPLRY	0.966785	HLA-A01:01						8.5	0.7	LTDSmRLL
1zup_BLCL1408_F3	8926	-0.0821602	0.878	VTDQNKIVTY	0.983088	HLA-A01:01	-0.1	0.977984	VTDQNKIVTY	0.983088	HLA-A01:01
1zup_BLCL1408_F3	8927						0.9	0.952261	ELRETPSSL	0.930319	HLA-B08:01
1zup_BLCL1408_F3	8931											0.7	0.73	TSDTSGHCMSSY	0.983046	HLA-A01:01
1zup_BLCL1408_F3	8934						0.7	0.906332	MLDHQPPQY	0.993549	HLA-A01:01
1zup_BLCL1408_F3	8938						-0.3	0.950807	QNDLRKMQL	0.690558	HLA-B08:01	-2.1	0.76	KLnmHPMQE
1zup_BLCL1408_F3	8947						-0.3	0.987599	PTDNPEAHSnLY
1zup_BLCL1408_F3	8957						1.2	0.944977	FLRTREPAL	0.969352	HLA-B08:01
1zup_BLCL1408_F3	8967											7.6	0.71	FVTLtLFSL
1zup_BLCL1408_F3	8972											0.4	0.82	FLRSQQEL	0.81416	HLA-B08:01
1zup_BLCL1408_F3	8974											1.2	0.77	EVLQRGEAL	0.857904	HLA-B08:01
1zup_BLCL1408_F3	8978	0.855925	0.96875	LTDSSLKY	0.971634	HLA-A01:01						0.3	0.93	LTnSSLKY
1zup_BLCL1408_F3	8979						0.9	0.89439	TVLSRANSL	0.93355	HLA-B08:01
1zup_BLCL1408_F3	8981	-0.961896	0.804444	IADmGHLKY
1zup_BLCL1408_F3	8983	-0.445489	0.714444	STEERTFQY	0.997814	HLA-A01:01						0.1	0.79	TSEERTFQY	0.996835	HLA-A01:01
1zup_BLCL1408_F3	8985											7.2	0.86	EYEATLEECGMVE	0.346685	HLA-A01:01
1zup_BLCL1408_F3	8986											-7.3	0.8	FtVDNQDTLSSK
1zup_BLCL1408_F3	8987											4.7	0.8	TmVMQESL
1zup_BLCL1408_F3	8990	0.933986	0.9375	QPYTKEVL	0.786242	HLA-B08:01
1zup_BLCL1408_F3	8995						-0.6	0.942559	ITDKnSLAY
1zup_BLCL1408_F3	8996											-0.6	0.77	LPGGRTPSL	0.84985	HLA-B08:01
1zup_BLCL1408_F3	9000											-2	0.89	VLKESGSLVL	0.52459	HLA-B08:01
1zup_BLCL1408_F3	9003	0.27014	0.833333	TGLQKVQSL	0.950661	HLA-B08:01	1	0.979287	TGLQKVQSL	0.950661	HLA-B08:01
1zup_BLCL1408_F3	9004	0.363188	0.89625	TMEGGTLKY	0.972391	HLA-A01:01	1	0.960797	TMEGGTLKY	0.972391	HLA-A01:01
1zup_BLCL1408_F3	9006											-3.1	0.71	LVLELPLVL	0.542866	HLA-C07:01
1zup_BLCL1408_F3	9007	0.552292	0.681111	EPLLKIRSA	0.785482	HLA-B08:01
1zup_BLCL1408_F3	9011											-0.7	0.7	DLLHFNHLDL	0.5022	HLA-B08:01
1zup_BLCL1408_F3	9014											3.1	0.74	MPSKVnPY
1zup_BLCL1408_F3	9027											-3.9	0.85	APNERLmSL
1zup_BLCL1408_F3	9031											0.1	0.84	TEnLEmETRY
1zup_BLCL1408_F3	9033	0.482781	0.697778	FLQQKAQSL	0.971349	HLA-B08:01
1zup_BLCL1408_F3	9036	-0.188242	0.763333	APNERPYSL	0.968416	HLA-B08:01						-3.9	0.91	APNERLmSL
1zup_BLCL1408_F3	9037											2.9	0.77	ELDQEERSP	0.500587	HLA-A01:01
1zup_BLCL1408_F3	9039											0.5	0.9	LnLQHRQSL
1zup_BLCL1408_F3	9041											-2.2	0.72	EVLELDMLDL	0.501059	HLA-A01:01
1zup_BLCL1408_F3	9046	-0.162615	0.94	NTDSPLRY	0.966785	HLA-A01:01						-0.3	0.86	NTDSPLRY	0.966785	HLA-A01:01
1zup_BLCL1408_F3	9048											7.3	0.89	KLmTKLEQL
1zup_BLCL1408_F3	9052											-1.8	0.74	EYEATYTECGCGAK	0.470428	HLA-A01:01
1zup_BLCL1408_F3	9053	1.65888	0.889	ALDKDAPLRY	0.9601	HLA-A01:01
1zup_BLCL1408_F3	9058						1.7	0.961496	NLMERNNL	0.838422	HLA-B08:01
1zup_BLCL1408_F3	9060	0.467692	0.703	VSDFGMTRY	0.996564	HLA-A01:01	0	0.976971	VSDSKqFTY
1zup_BLCL1408_F3	9062	0.0716042	0.69	NLmERNNL
1zup_BLCL1408_F3	9063											0.7	0.8	PDPDYRL
1zup_BLCL1408_F3	9067	-1.21666	0.84625	DLNLKHQI	0.732625	HLA-B08:01
1zup_BLCL1408_F3	9069						0	0.963666	MTERQALSY	0.994162	HLA-A01:01
1zup_BLCL1408_F3	9079						-0.1	0.932929	LGVERASSL	0.821957	HLA-B08:01
1zup_BLCL1408_F3	9081	0.307115	0.865	DAYVRQGL	0.729939	HLA-B08:01	1.1	0.931711	DAYVRQGL	0.729939	HLA-B08:01
1zup_BLCL1408_F3	9084											1.3	0.71	QNCmATLEECGGCAK
1zup_BLCL1408_F3	9086											2.2	0.73	PyEATLEECGCGAK
1zup_BLCL1408_F3	9088	0.899899	0.744444	EVLQRGEAL	0.857904	HLA-B08:01						1.2	0.78	EVLQRGEAL	0.857904	HLA-B08:01
1zup_BLCL1408_F3	9089											0.7	0.9	NTDDPLRY	0.976093	HLA-A01:01
1zup_BLCL1408_F3	9092	0.0886688	0.932	ALDKDAPLRY	0.9601	HLA-A01:01	-0.2	0.983772	ALDKDAPLRY	0.9601	HLA-A01:01
1zup_BLCL1408_F3	9095	-0.843828	0.78125	EPTVRTEL	0.738635	HLA-B08:01						-8.7	0.7	EPTVAALML	0.513561	HLA-B08:01
1zup_BLCL1408_F3	9099											-0.3	0.89	EYEATLEECGGCAK	0.484545	HLA-A01:01
1zup_BLCL1408_F3	9101											-3.3	0.73	TVLHKYSL	0.794879	HLA-B08:01
1zup_BLCL1408_F3	9102	1.07857	0.9425	ELQVKQQL	0.900579	HLA-B08:01						-0.2	0.81	ELQVKQQL	0.900579	HLA-B08:01
1zup_BLCL1408_F3	9104	0.534816	0.7625	TSYVRTTI	0.559169	HLA-B08:01						0.1	0.93	TSYVRTTL	0.732408	HLA-B08:01
1zup_BLCL1408_F3	9106											1.8	0.7	MLKECFNVYV	0.500439	HLA-B08:01
1zup_BLCL1408_F3	9122	0.681	0.792222	TGLQKVQSL	0.950661	HLA-B08:01
1zup_BLCL1408_F3	9124	0.730451	0.777778	QLKQQIQSI	0.944015	HLA-B08:01	-0.6	0.89019	QLKQQIQSI	0.944015	HLA-B08:01	-1.3	0.71	DSKLFTNDF	0.52977	HLA-B08:01
1zup_BLCL1408_F3	9125	-0.616155	0.789091	ASDKETYELRY	0.979626	HLA-A01:01
1zup_BLCL1408_F3	9127	-0.311043	0.826364	NTSDmMGRMSY			-1.5	0.956107	NTSDmMGRMSY
1zup_BLCL1408_F3	9129											6.3	0.81	tsERQHHYY
1zup_BLCL1408_F3	9133	-0.793881	0.745	MSEIEAKVRY	0.946488	HLA-A01:01
1zup_BLCL1408_F3	9134	-0.830559	0.878889	YVDEYRNDY	0.985355	HLA-A01:01						1.3	0.82	YVDEYDNRY	0.998106	HLA-A01:01
1zup_BLCL1408_F3	9136						-0.9	0.934911	YTETEPYHnY
1zup_BLCL1408_F3	9141						-0.8	0.945032	PTDnPEAHSNLY
1zup_BLCL1408_F3	9143	-1.03876	0.792222	FPPKPKDTL	0.68282	HLA-B08:01	1.9	0.94364	FPPKPKDTL	0.68282	HLA-B08:01
1zup_BLCL1408_F3	9148	-0.577932	0.80875	MGNIRNEI	0.533744	HLA-B08:01	-1.9	0.915921	MGNIRNEI	0.533744	HLA-B08:01
1zup_BLCL1408_F3	9152											7.9	0.71	EVDSVNELEY	0.974781	HLA-A01:01
1zup_BLCL1408_F3	9160	-1.05264	0.762727	VTAQVVGTERY	0.791961	HLA-A01:01	-2.2	0.964385	VTAQVVGTERY	0.791961	HLA-A01:01
1zup_BLCL1408_F3	9161	-0.332858	0.894444	DQMQRKLTL	0.978054	HLA-B08:01	-0.9	0.953159	DQMQRKLTL	0.978054	HLA-B08:01
1zup_BLCL1408_F3	9166	-1.18196	0.792	ALDKDAPLRY	0.9601	HLA-A01:01
1zup_BLCL1408_F3	9167											0.3	0.81	LPAAHKLEGAL	0.517172	HLA-B08:01
1zup_BLCL1408_F3	9168	-0.86265	0.746667	ELLKKSISV	0.924492	HLA-B08:01	0.2	0.923464	ELLKKSISV	0.924492	HLA-B08:01
1zup_BLCL1408_F3	9169	-0.415546	0.8275	NLMERNNL	0.838422	HLA-B08:01
1zup_BLCL1408_F3	9171						-3.6	0.969069	TSDPAAHALY	0.997699	HLA-A01:01
1zup_BLCL1408_F3	9174	1.0803	0.92	NTDSPLRY	0.966785	HLA-A01:01
1zup_BLCL1408_F3	9177											0.7	0.79	PDPDLRY
1zup_BLCL1408_F3	9180	-1.45138	0.961429	YSDKYGL			-0.7	0.899037	YSDKYGL
1zup_BLCL1408_F3	9181											0.1	0.88	TnDETALHY
1zup_BLCL1408_F3	9183	0.154119	0.763333	EQKIKADIL	0.756526	HLA-B08:01
1zup_BLCL1408_F3	9188	-0.270363	0.828889	MTERQALSY	0.994162	HLA-A01:01
1zup_BLCL1408_F3	9193	0.140174	0.79	HVDQDLTTY	0.975003	HLA-A01:01	-0.7	0.971476	HVDQDLTTY	0.975003	HLA-A01:01
1zup_BLCL1408_F3	9203											1.2	0.73	EVLQRGEAL	0.857904	HLA-B08:01
1zup_BLCL1408_F3	9204						-1.5	0.924604	LSDKNIEqY
1zup_BLCL1408_F3	9209											-0.3	0.9	EYEATLEECGCGAK	0.475321	HLA-A01:01
1zup_BLCL1408_F3	9214											-2.7	0.71	FLDEKTHEL	0.849279	HLA-A01:01
1zup_BLCL1408_F3	9216											-6.7	0.71	ELRRTLQSL
1zup_BLCL1408_F3	9220						-0.5	0.879608	ATAPTRGSARAAGYDLY	0.773333	HLA-A01:01
1zup_BLCL1408_F3	9224	-3.34959	0.836667	VLANKVSSL	0.909782	HLA-B08:01	-2.5	0.904631	VLANKVSSL	0.909782	HLA-B08:01
1zup_BLCL1408_F3	9228						-1	0.940215	DLLQKHTL	0.940799	HLA-B08:01	6.9	0.78	NNLQKHnV
1zup_BLCL1408_F3	9231	4.85722	0.706364	ASDKETYELRY	0.979626	HLA-A01:01						7.2	0.73	SSPQETYYELR	0.502294	HLA-A01:01
1zup_BLCL1408_F3	9235						-0.6	0.950905	DIRPKVSSL	0.992163	HLA-B08:01
1zup_BLCL1408_F3	9236											-1.1	0.76	TCMDTAQRNLY	0.604416	HLA-A01:01
1zup_BLCL1408_F3	9240	-0.280142	0.906667	FLDEKTHEL	0.849279	HLA-A01:01						-2.3	0.91	FLDEKTHEL	0.849279	HLA-A01:01
1zup_BLCL1408_F3	9242	-1.4891	0.911818	ASDKETYELRY	0.979626	HLA-A01:01
1zup_BLCL1408_F3	9243	-0.840529	0.659091	DTSRPLGDSmY			-0.4	0.989958	DTSRPLGDSmY
1zup_BLCL1408_F3	9245	-1.97752	0.705556	VADVVKDAY	0.933226	HLA-A01:01
1zup_BLCL1408_F3	9251						-0.9	0.890299	qTDKLKELY
1zup_BLCL1408_F3	9253	-1.45327	0.828	VSDVEMQEHY	0.985039	HLA-A01:01	-1.4	0.962895	VSDVEMQEHY	0.985039	HLA-A01:01
1zup_BLCL1408_F3	9254						-1	0.918079	RTEEGPTLSYG	0.708779	HLA-A01:01
1zup_BLCL1408_F3	9257	-3.31809	0.764444	LGNGRLEAM	0.605799	HLA-B08:01	-1.3	0.958248	LGNGRLEAM	0.605799	HLA-B08:01
1zup_BLCL1408_F3	9258	0.0575044	0.752222	YNIQKESTL	0.745759	HLA-B08:01	0.3	0.918079	YNIQKESTL	0.745759	HLA-B08:01
1zup_BLCL1408_F3	9264	-0.0896044	0.917778	LTDDKLSQY	0.999014	HLA-A01:01	-0.5	0.962409	LTDDKLSQY	0.999014	HLA-A01:01
1zup_BLCL1408_F3	9266	-0.808622	0.696	LLDHAQRSLY	0.981468	HLA-A01:01	-1.4	0.944201	LLDHAQRSLY	0.981468	HLA-A01:01
1zup_BLCL1408_F3	9268											-2.8	0.8	KNyCDNQDTLSSK
1zup_BLCL1408_F3	9272	-0.429922	0.779	NSLQDRYGSY	0.676469	HLA-A01:01	0.3	0.94585	NSLQDRYGSY	0.676469	HLA-A01:01
1zup_BLCL1408_F3	9278	-0.630605	0.9125	IAYQKQVI	0.582321	HLA-B08:01	-0.3	0.934191	IAYQKQVI	0.582321	HLA-B08:01
1zup_BLCL1408_F3	9279	-0.83737	0.95625	QNLERQVL	0.626121	HLA-B08:01						-1.7	0.91	QNLERQVL	0.626121	HLA-B08:01
1zup_BLCL1408_F3	9286	-0.787945	0.848889	DQKMKSISL	0.988638	HLA-B08:01	-0.4	0.965369	DQKMKSISL	0.988638	HLA-B08:01
1zup_BLCL1408_F3	9291											9.1	0.74	ELLYNRQQL	0.770959	HLA-B08:01
1zup_BLCL1408_F3	9300	-0.473523	0.951111	HIDVGGHMY	0.99058	HLA-A01:01	-0.4	0.981277	HIDVGGHMY	0.99058	HLA-A01:01
1zup_BLCL1408_F3	9301	-3.68094	0.956667	VTNESPLKY	0.982574	HLA-A01:01	-0.4	0.940869	VTNESPLKY	0.982574	HLA-A01:01
1zup_BLCL1408_F3	9311	-1.19132	0.73375	DIIRKQVL	0.892878	HLA-B08:01
1zup_BLCL1408_F3	9312	-0.780545	0.793	VTDSVRGNLY	0.996373	HLA-A01:01	-1.4	0.967548	VTDSVRGNLY	0.996373	HLA-A01:01
1zup_BLCL1408_F3	9313											-0.5	0.81	nLLRKQVL
1zup_BLCL1408_F3	9314											-0.4	0.74	KNAATVLnLL
1zup_BLCL1408_F3	9317	0.775737	0.8475	YVDAVLGKGHQY	0.989819	HLA-A01:01
1zup_BLCL1408_F3	9319						-4	0.968945	ITEDKTELY	0.997959	HLA-A01:01
1zup_BLCL1408_F3	9323						0.9	0.949207	EILERKTVL	0.982473	HLA-B08:01
1zup_BLCL1408_F3	9324						-0.4	0.971304	LVDQRVAEY	0.982323	HLA-A01:01
1zup_BLCL1408_F3	9325											7.2	0.87	EYEATLEECGMVE	0.346685	HLA-A01:01
1zup_BLCL1408_F3	9326											0.5	0.77	LERQQVSTL	0.631103	HLA-B08:01
1zup_BLCL1408_F3	9328	-0.777611	0.745	EAEAARVDL	0.50771	HLA-B08:01
1zup_BLCL1408_F3	9330											3.4	0.83	LDLTREKQL	0.518705	HLA-B08:01
1zup_BLCL1408_F3	9331	-0.751012	0.845556	FPPKPKDTL	0.68282	HLA-B08:01
1zup_BLCL1408_F3	9333	-0.179906	0.626667	RPFERTITM	0.931401	HLA-B08:01
1zup_BLCL1408_F3	9334						-0.4	0.943244	RPFERTITm
1zup_BLCL1408_F3	9341	-1.07797	0.79375	DLLQKHTL	0.940799	HLA-B08:01
1zup_BLCL1408_F3	9344	0.502659	0.941111	ITQGTPLKY	0.952429	HLA-A01:01	-0.4	0.968758	ITQGTPLKY	0.952429	HLA-A01:01
1zup_BLCL1408_F3	9345	-0.977161	0.891111	IPLKEKPVL	0.74262	HLA-B08:01						-2.1	0.87	LPLKEKPVL	0.720622	HLA-B08:01
1zup_BLCL1408_F3	9347	-1.3907	0.963333	YVDAVLGKGHQY	0.989819	HLA-A01:01	-0.7	0.992781	YVDAVLGKGHQY	0.989819	HLA-A01:01
1zup_BLCL1408_F3	9352	0.0560141	0.719091	ASDKETYELRY	0.979626	HLA-A01:01
1zup_BLCL1408_F3	9356	0.930338	0.802222	DIKARALQV	0.919075	HLA-B08:01						1.1	0.8	DLKAARLQV
1zup_BLCL1408_F3	9358						-1.2	0.910095	APNLKSqL
1zup_BLCL1408_F3	9360	-0.75452	0.765455	RADKSAVGFDY	0.708494	HLA-A01:01	-1.2	0.969346	RADKSAVGFDY	0.708494	HLA-A01:01
1zup_BLCL1408_F3	9363	-1.34361	0.872727	ASDKETYELRY	0.979626	HLA-A01:01
1zup_BLCL1408_F3	9366											2.4	0.83	LDKKALQTY	0.584156	HLA-A01:01
1zup_BLCL1408_F3	9368	-2.05168	0.797778	YTEEDAASY	0.99739	HLA-A01:01
1zup_BLCL1408_F3	9371						0.7	0.930678	nLKQKVTF
1zup_BLCL1408_F3	9377											0.3	0.84	LNAQRNVAL	0.764275	HLA-B08:01
1zup_BLCL1408_F3	9385											-1.5	0.84	YMmmDNQDTLSSK
1zup_BLCL1408_F3	9390											0	0.79	LPATRnVL
1zup_BLCL1408_F3	9394						-1.1	0.953299	ELRIKENEL	0.985084	HLA-B08:01
1zup_BLCL1408_F3	9396											-0.3	0.71	LAYQKQVL	0.775857	HLA-B08:01
1zup_BLCL1408_F3	9400						0.1	0.927343	VPQVKASAL	0.938979	HLA-B08:01
1zup_BLCL1408_F3	9402	0.141923	0.957778	EPITKHIGL	0.887789	HLA-B08:01	-0.1	0.911078	EPITKHIGL	0.887789	HLA-B08:01
1zup_BLCL1408_F3	9403											6.1	0.73	FYSDRKLDCL	0.510271	HLA-B08:01
1zup_BLCL1408_F3	9405	-3.34224	0.866667	ITQGTPLKY	0.952429	HLA-A01:01
1zup_BLCL1408_F3	9408	-0.557673	0.656154	TTEPIKPEQTTEY	0.987749	HLA-A01:01	-1.2	0.989219	TTEPIKPEQTTEY	0.987749	HLA-A01:01
1zup_BLCL1408_F3	9409						-2.4	0.973563	HTADVHGLYY	0.997359	HLA-A01:01
1zup_BLCL1408_F3	9411	-0.344103	0.959	LVDDGTVGKY	0.981866	HLA-A01:01	0.7	0.940095	LVDDGTVGKY	0.981866	HLA-A01:01
1zup_BLCL1408_F3	9415											1.6	0.71	EFtmDNQDTLSSK
1zup_BLCL1408_F3	9419	-0.862453	0.92	HIDVGGHMY	0.99058	HLA-A01:01
1zup_BLCL1408_F3	9424	-1.44125	0.689231	ASEIQIKQQSTSY	0.837147	HLA-A01:01	-1.5	0.985976	ASEIQIKQQSTSY	0.837147	HLA-A01:01
1zup_BLCL1408_F3	9431	-0.0985152	0.85375	DIIRKQVL	0.892878	HLA-B08:01						-0.5	0.89	LDLKRQVL	0.556806	HLA-B08:01
1zup_BLCL1408_F3	9432											-1.6	0.71	ELPQRLHAL	0.978092	HLA-B08:01
1zup_BLCL1408_F3	9433	-0.16868	0.714444	HLLERVDQV	0.677992	HLA-B08:01
1zup_BLCL1408_F3	9436											0.5	0.85	SPPLKHSL	0.869647	HLA-B08:01
1zup_BLCL1408_F3	9437											0.6	0.82	VPLTKQEL
1zup_BLCL1408_F3	9441											6.1	0.71	TQVARPASL	0.825585	HLA-B08:01
1zup_BLCL1408_F3	9442	0.313939	0.686667	LVDQRVAEY	0.982323	HLA-A01:01
1zup_BLCL1408_F3	9443	-0.208553	0.775556	DMYNRMTSA	0.789972	HLA-B08:01						0.5	0.73	MDYNRMTSA	0.535316	HLA-B08:01
1zup_BLCL1408_F3	9444	-0.757003	0.966667	ASDSAEFHY	0.994266	HLA-A01:01	-0.6	0.959033	ASDSAEFHY	0.994266	HLA-A01:01
1zup_BLCL1408_F3	9446	0.597239	0.938889	EIPQRLHAL	0.952281	HLA-B08:01	1	0.901628	EIPQRLHAL	0.952281	HLA-B08:01
1zup_BLCL1408_F3	9447											0.1	0.71	KDDLRPEAL
1zup_BLCL1408_F3	9449											0.2	0.91	EYqATLEECGCGAK
1zup_BLCL1408_F3	9452						-0.4	0.911433	YTEEDAASY	0.99739	HLA-A01:01
1zup_BLCL1408_F3	9453	-0.751012	0.798889	FPPKPKDTL	0.68282	HLA-B08:01
1zup_BLCL1408_F3	9460	5.05128	0.653077	RSSPAADAQEENLY	0.647831	HLA-A01:01
1zup_BLCL1408_F3	9462	0.110722	0.932222	ITQGTPLKY	0.952429	HLA-A01:01
1zup_BLCL1408_F3	9464	-1.3907	0.9675	YVDAVLGKGHQY	0.989819	HLA-A01:01
1zup_BLCL1408_F3	9465											0.1	0.73	FPLERKPSM
1zup_BLCL1408_F3	9473	0.733023	0.866667	DIKARALQV	0.919075	HLA-B08:01	1.1	0.917915	DIKARALQV	0.919075	HLA-B08:01
1zup_BLCL1408_F3	9475											-0.4	0.81	TVLTQRSV	0.522551	HLA-B08:01
1zup_BLCL1408_F3	9476	1.29072	0.9375	YQGLKQEL	0.566015	HLA-B08:01
1zup_BLCL1408_F3	9477						1.4	0.9606	SPQGRVMTI	0.856024	HLA-B08:01
1zup_BLCL1408_F3	9479						0.4	0.975326	STDVSQPPHVY	0.992119	HLA-A01:01
1zup_BLCL1408_F3	9488	-1.4891	0.891818	ASDKETYELRY	0.979626	HLA-A01:01
1zup_BLCL1408_F3	9489	-2.05666	0.886667	AADSYTDSY	0.963591	HLA-A01:01
1zup_BLCL1408_F3	9497	-1.40901	0.769	NLAQRNVAL	0.960335	HLA-B08:01						0.3	0.71	VQARNQVAL
1zup_BLCL1408_F3	9498						-0.8	0.966727	ATDRFRSLY	0.995862	HLA-A01:01
1zup_BLCL1408_F3	9499	0.922369	0.964444	FTATRPGVY	0.920904	HLA-A01:01	1.2	0.985213	FTATRPGVY	0.920904	HLA-A01:01
1zup_BLCL1408_F3	9501	-1.04547	0.886	YPNPYSKHVL	0.680351	HLA-B08:01	0.1	0.974087	YPNPYSKHVL	0.680351	HLA-B08:01
1zup_BLCL1408_F3	9508											0.6	0.71	AHSLKLNGL	0.527622	HLA-B08:01
1zup_BLCL1408_F3	9510	0.0132222	0.680909	PKFEVIEKPQA	0.498208	HLA-A01:01	0.6	0.956019	PKFEVIEKPQA	0.498208	HLA-A01:01
1zup_BLCL1408_F3	9512											1	0.77	DVKEKLYAV	0.970139	HLA-B08:01
1zup_BLCL1408_F3	9531	0.178625	0.868	GTDDGKVGLY	0.99304	HLA-A01:01	1.5	0.968476	GTDDGKVGLY	0.99304	HLA-A01:01
1zup_BLCL1408_F3	9533						0.6	0.945958	VAKQLASAL	0.810379	HLA-B08:01
1zup_BLCL1408_F3	9539	-1.19838	0.79625	NTDSPLRY	0.966785	HLA-A01:01
1zup_BLCL1408_F3	9541						1.1	0.917504	VSDDGTLHM	0.937473	HLA-A01:01
1zup_BLCL1408_F3	9548						1.9	0.914308	HTEQLVqDQY
1zup_BLCL1408_F3	9553						0.9	0.948285	ELRYKPDL	0.827017	HLA-B08:01
1zup_BLCL1408_F3	9561	0.11222	0.791	FPPKPKDTL	0.68282	HLA-B08:01						0.1	0.83	LPFEKKPAL	0.955522	HLA-B08:01
1zup_BLCL1408_F3	9562	2.36391	0.841111	DMYNRMTSA	0.789972	HLA-B08:01
1zup_BLCL1408_F3	9566	0.911173	0.7575	DTILKHTL	0.825257	HLA-B08:01
1zup_BLCL1408_F3	9570											1	0.73	TSCETTLHY	0.930069	HLA-A01:01
1zup_BLCL1408_F3	9572	1.63133	0.944444	AYSSYVHQY	0.581287	HLA-A01:01	1.4	0.972622	AYSSYVHQY	0.581287	HLA-A01:01
1zup_BLCL1408_F3	9574	6.98589	0.719231	RSSPAADAQEENLY	0.647831	HLA-A01:01	-1.4	0.988345	RSSPAADAQEENLY	0.647831	HLA-A01:01
1zup_BLCL1408_F3	9576	3.10811	0.763333	QLNARTSVL	0.933367	HLA-B08:01	0.6	0.914137	QLNARTSVL	0.933367	HLA-B08:01
1zup_BLCL1408_F3	9578											7.2	0.75	LTKGPTMSV	0.519065	HLA-B08:01
1zup_BLCL1408_F3	9579						2.5	0.945361	TVKAmQEAL
1zup_BLCL1408_F3	9584	1.20462	0.94375	DTILKHTL	0.825257	HLA-B08:01						0.2	0.95	SELLKHTL	0.627283	HLA-B08:01
1zup_BLCL1408_F3	9586											-0.5	0.84	MVAPRASL	0.810882	HLA-B08:01
1zup_BLCL1408_F3	9588						0.2	0.953995	ETDLRNHFY	0.997413	HLA-A01:01
1zup_BLCL1408_F3	9591											-4.7	0.74	EYEATLEEGSEVm
1zup_BLCL1408_F3	9595						-0.6	0.957105	TVKAMQEAL	0.712952	HLA-B08:01
1zup_BLCL1408_F3	9597	1.98194	0.917	ASEFPGAQHY	0.967513	HLA-A01:01
1zup_BLCL1408_F3	9598						1	0.936072	YSLQRQSL	0.821128	HLA-B08:01
1zup_BLCL1408_F3	9607	0.16022	0.862222	AADSYTDSY	0.963591	HLA-A01:01
1zup_BLCL1408_F3	9618	0.922369	0.953333	FTATRPGVY	0.920904	HLA-A01:01
1zup_BLCL1408_F3	9620	-0.552712	0.937	YPNPYSKHVL	0.680351	HLA-B08:01
1zup_BLCL1408_F3	9636						-0.2	0.922695	VSQQRALAL	0.805667	HLA-B08:01
1zup_BLCL1408_F3	9640	1.08564	0.88375	MSYERSMM	0.563897	HLA-B08:01	1	0.960914	MSYERSMM	0.563897	HLA-B08:01
1zup_BLCL1408_F3	9641	0.908026	0.784444	EMQNKISSL	0.981785	HLA-B08:01
1zup_BLCL1408_F3	9649											0.9	0.71	AHSLKGVSL	0.59885	HLA-B08:01
1zup_BLCL1408_F3	9651	-2.02157	0.735556	NSDSVPPGY	0.980436	HLA-A01:01
1zup_BLCL1408_F3	9653	-0.264646	0.79875	QPVPRSVL	0.792931	HLA-B08:01
1zup_BLCL1408_F3	9655											0.4	0.82	LMKEAAEL	0.60684	HLA-B08:01
1zup_BLCL1408_F3	9660	-0.582063	0.864444	ETERIVTTY	0.968366	HLA-A01:01	0.7	0.942271	ETERIVTTY	0.968366	HLA-A01:01
1zup_BLCL1408_F3	9664	-0.363508	0.86875	DVRVKAVL	0.91796	HLA-B08:01	-0.4	0.913879	DVRVKAVL	0.91796	HLA-B08:01
1zup_BLCL1408_F3	9672											0.5	0.76	TDEEEGLKY
1zup_BLCL1408_F3	9673	-0.294636	0.882727	DSYSSSRSDLY	0.779119	HLA-A01:01
1zup_BLCL1408_F3	9674											6.3	0.73	LLDYHDLLSY	0.979234	HLA-A01:01
1zup_BLCL1408_F3	9675						0.3	0.979879	NADLRKLAV	0.737442	HLA-B08:01
1zup_BLCL1408_F3	9682											1	0.71	SGEmTTLHY
1zup_BLCL1408_F3	9686						-0.1	0.878883	ELEERAEAL	0.73837	HLA-B08:01
1zup_BLCL1408_F3	9688											0.5	0.76	LGLEKNSL	0.633023	HLA-B08:01
1zup_BLCL1408_F3	9696						-0.3	0.972346	LLDVRDRDSY	0.841538	HLA-A01:01
1zup_BLCL1408_F3	9699											-6.5	0.7	TGEVSFNLA
1zup_BLCL1408_F3	9702	-1.47403	0.779	ASEFPGAQHY	0.967513	HLA-A01:01
1zup_BLCL1408_F3	9704	-1.12376	0.858182	FTENDKEYQEY	0.994743	HLA-A01:01	-1.3	0.990206	FTENDKEYQEY	0.994743	HLA-A01:01
1zup_BLCL1408_F3	9705						0.1	0.979514	TSDDVKEqIY
1zup_BLCL1408_F3	9706											-5.9	0.7	YEQWKWsSmY
1zup_BLCL1408_F3	9707	-1.05798	0.863333	RTEPFQDGY	0.990218	HLA-A01:01						-0.5	0.83	TREPFQDGY	0.572358	HLA-A01:01
1zup_BLCL1408_F3	9709	0.255188	0.902222	ELKEKLSAL	0.996086	HLA-B08:01	1	0.897306	ELKEKLSAL	0.996086	HLA-B08:01
1zup_BLCL1408_F3	9710											-3.5	0.79	VLDEVKWYT	0.564434	HLA-A01:01
1zup_BLCL1408_F3	9715	1.07818	0.9	ASEFPGAQHY	0.967513	HLA-A01:01	0.6	0.945361	ASEFPGAQHY	0.967513	HLA-A01:01
1zup_BLCL1408_F3	9716											-0.6	0.84	QQLEKVVm
1zup_BLCL1408_F3	9719											-8.9	0.77	YHETKsHY
1zup_BLCL1408_F3	9727						-0.8	0.966926	YSADREDLY	0.99267	HLA-A01:01
1zup_BLCL1408_F3	9731	1.15555	0.87	DIKSHYAF	0.743274	HLA-B08:01
1zup_BLCL1408_F3	9740	-2.16729	0.837778	MLDKSPIRY	0.993997	HLA-A01:01						-4.4	0.75	MLDKSPLRY	0.996547	HLA-A01:01
1zup_BLCL1408_F3	9743	-1.04547	0.673	YPNPYSKHVL	0.680351	HLA-B08:01
1zup_BLCL1408_F3	9752	0.0218316	0.848889	ELYSRSGEL	0.877254	HLA-B08:01						3.2	0.77	NKYLCLHY	0.457556	HLA-A01:01
1zup_BLCL1408_F3	9753	-0.886728	0.78	ELKNVKYEL	0.905945	HLA-B08:01	-0.1	0.962409	ELKNVKYEL	0.905945	HLA-B08:01
1zup_BLCL1408_F3	9761											1	0.71	sLSEFMmGY
1zup_BLCL1408_F3	9762	-1.15796	0.902222	IADMGHLKY	0.984776	HLA-A01:01
1zup_BLCL1408_F3	9764											-0.2	0.73	AYHCNSESAY	0.504079	HLA-A01:01
1zup_BLCL1408_F3	9765											0.1	0.76	LEFEKAKSL	0.626638	HLA-B08:01
1zup_BLCL1408_F3	9775	0.537455	0.952222	IADMGHLKY	0.984776	HLA-A01:01
1zup_BLCL1408_F3	9782											0.5	0.81	TDqEEGLKY
1zup_BLCL1408_F3	9784						-1	0.906986	DMRQTVAV	0.66848	HLA-B08:01	0.2	0.75	KPSEVKVM
1zup_BLCL1408_F3	9786	-1.28013	0.875556	ELDAVQREY	0.958514	HLA-A01:01	0.2	0.903093	ELDAVQREY	0.958514	HLA-A01:01
1zup_BLCL1408_F3	9787	-1.33946	0.68875	DIIIKREM	0.777166	HLA-B08:01
1zup_BLCL1408_F3	9790											1.1	0.77	LPTAKPEL	0.653567	HLA-B08:01
1zup_BLCL1408_F3	9792	-0.607248	0.888182	DSYSSSRSDLY	0.779119	HLA-A01:01	-1.1	0.987759	DSYSSSRSDLY	0.779119	HLA-A01:01
1zup_BLCL1408_F3	9795	-2.09022	0.937778	IADmGHLKY
1zup_BLCL1408_F3	9796	0.0127755	0.70625	DIIIKREM	0.777166	HLA-B08:01						-5.8	0.83	DLLLKnTSL
1zup_BLCL1408_F3	9797											-3.6	0.7	YPLTWKAQL	0.726764	HLA-B08:01
1zup_BLCL1408_F3	9798	-0.25345	0.833333	GLDGGHYTAY	0.862445	HLA-A01:01
1zup_BLCL1408_F3	9800											8.2	0.72	SGDsDTLHY
1zup_BLCL1408_F3	9801											1.4	0.87	LSWSKLRSL	0.644306	HLA-B08:01
1zup_BLCL1408_F3	9803	-1.26654	0.964444	IADmGHLKY
1zup_BLCL1408_F3	9805						-1.7	0.937087	TTQASYAAQSAY	0.711721	HLA-A01:01
1zup_BLCL1408_F3	9806	-0.403448	0.9675	ADMGHLKY	0.664698	HLA-A01:01	-0.5	0.977314	ADMGHLKY	0.664698	HLA-A01:01
1zup_BLCL1408_F3	9810											1	0.7	QPQLTYTm
1zup_BLCL1408_F3	9812											5.2	0.79	PHAyECSTVFDK
1zup_BLCL1408_F3	9816											-3.4	0.71	KNVVWLADGSY	0.504007	HLA-A01:01
1zup_BLCL1408_F3	9820	-3.9722	0.803333	IADMGHLKY	0.984776	HLA-A01:01
1zup_BLCL1408_F3	9826	-0.16853	0.808182	FTENDKEYQEY	0.994743	HLA-A01:01
1zup_BLCL1408_F3	9830						0	0.92949	NSLLQRQL	0.565083	HLA-B08:01
1zup_BLCL1408_F3	9833	-0.54088	0.968571	DMGHLKY			1.4	0.96585	DMGHLKY
1zup_BLCL1408_F3	9836						-0.7	0.954906	KSDHTDVLYY	0.985285	HLA-A01:01
1zup_BLCL1408_F3	9837	0.404103	0.92625	DGKLKVTL	0.903618	HLA-B08:01
1zup_BLCL1408_F3	9848	0.135647	0.94625	DIKSHYAF	0.743274	HLA-B08:01	0.2	0.971675	DIKSHYAF	0.743274	HLA-B08:01
1zup_BLCL1408_F3	9850						-0.3	0.883865	LLNSKEAAL	0.806765	HLA-B08:01
1zup_BLCL1408_F3	9853											5.9	0.76	LHMAKTKSL	0.726459	HLA-B08:01
1zup_BLCL1408_F3	9856											-2.4	0.77	KLCDNQQFCL	0.50699	HLA-A01:01
1zup_BLCL1408_F3	9861	0.324872	0.893333	KFIDTTSKF	0.515246	HLA-C07:01	0.7	0.95056	KFIDTTSKF	0.515246	HLA-C07:01
1zup_BLCL1408_F3	9863											-2.6	0.78	TVEETGGDSAMKY	0.871394	HLA-A01:01
1zup_BLCL1408_F3	9867											9.5	0.83	LPAETVLAL	0.584432	HLA-B08:01
1zup_BLCL1408_F3	9872	1.08459	0.778889	ELITKAVAA	0.675005	HLA-B08:01	2.5	0.905012	ELITKAVAA	0.675005	HLA-B08:01
1zup_BLCL1408_F3	9873	0.0750081	0.847	LLDRPGEGSY	0.9543	HLA-A01:01	0.6	0.96956	LLDRPGEGSY	0.9543	HLA-A01:01
1zup_BLCL1408_F3	9874											-8.4	0.74	MPSEHGAVM	0.652082	HLA-B08:01
1zup_BLCL1408_F3	9876											0.1	0.81	DGPRVVFR	0.463481	HLA-A01:01
1zup_BLCL1408_F3	9880	3.42425	0.953333	IADMGHLKY	0.984776	HLA-A01:01
1zup_BLCL1408_F3	9881	2.92868	0.67375	DIIIKREm
1zup_BLCL1408_F3	9883											-0.8	0.94	NEDSPLRY	0.589111	HLA-A01:01
1zup_BLCL1408_F3	9887											0.9	0.82	EMSEKVVm
1zup_BLCL1408_F3	9888	1.39813	0.818889	HIDSANALY	0.992088	HLA-A01:01	-1	0.900838	HIDSANALY	0.992088	HLA-A01:01
1zup_BLCL1408_F3	9891	0.34653	0.945556	IADMGHLKY	0.984776	HLA-A01:01
1zup_BLCL1408_F3	9895	-0.614545	0.91625	DLGKKIAL	0.8661	HLA-B08:01	-0.7	0.946496	DLGKKIAL	0.8661	HLA-B08:01
1zup_BLCL1408_F3	9896						-0.4	0.934846	EGFDRSTSL	0.909774	HLA-B08:01
1zup_BLCL1408_F3	9899	-1.23532	0.854444	ELITKAVAA	0.675005	HLA-B08:01
1zup_BLCL1408_F3	9902	-0.713775	0.89875	MPSEKVVM	0.750556	HLA-B08:01	0.8	0.937338	MPSEKVVM	0.750556	HLA-B08:01
1zup_BLCL1408_F3	9908	0.218206	0.938889	YADPVNAHY	0.997617	HLA-A01:01
1zup_BLCL1408_F3	9909											-9.4	0.77	LADRWMNST	0.514446	HLA-A01:01
1zup_BLCL1408_F3	9911											-2.4	0.77	LSSPVTKmQQSALs
1zup_BLCL1408_F3	9913	-3.50063	0.923333	IADmGHLKY
1zup_BLCL1408_F3	9915	-0.18377	0.6625	DIIIKREM	0.777166	HLA-B08:01						-5.8	0.73	EVLLKTDSL	0.851684	HLA-B08:01
1zup_BLCL1408_F3	9916	0.0505017	0.958889	YADPVNAHY	0.997617	HLA-A01:01
1zup_BLCL1408_F3	9918						-1.3	0.991981	ETEHEPTKMFY	0.97873	HLA-A01:01
1zup_BLCL1408_F3	9921											2.5	0.76	ELVPKAVAA	0.658353	HLA-B08:01
1zup_BLCL1408_F3	9922	-1.85769	0.790909	DSYSSSRSDLY	0.779119	HLA-A01:01
1zup_BLCL1408_F3	9926	-2.01876	0.946667	IADmGHLKY
1zup_BLCL1408_F3	9927											0.1	0.78	LDERKYAAL	0.525019	HLA-B08:01
1zup_BLCL1408_F3	9929											0.8	0.84	ELLtLTLA
1zup_BLCL1408_F3	9933	-0.960158	0.813636	ETSRLYEDSGY	0.687177	HLA-A01:01	-1.2	0.991537	ETSRLYEDSGY	0.687177	HLA-A01:01
1zup_BLCL1408_F3	9939											8.4	0.83	MVMGKKLDV
1zup_BLCL1408_F3	9940						-0.6	0.907357	LSEDKDTLY	0.995479	HLA-A01:01
1zup_BLCL1408_F3	9950	1.12396	0.822222	DVMIRKEEL	0.976512	HLA-B08:01						-1	0.82	DVMLRKEEL	0.977355	HLA-B08:01
1zup_BLCL1408_F3	9953	0.542772	0.877778	EGFDRSTSL	0.909774	HLA-B08:01
1zup_BLCL1408_F3	9958	-0.740664	0.95	DGKLKVTL	0.903618	HLA-B08:01
1zup_BLCL1408_F3	9965	-1.00416	0.962857	DMGHLKY
1zup_BLCL1408_F3	9969											5.9	0.83	LMAHKTKSL	0.917428	HLA-B08:01
1zup_BLCL1408_F3	9973											-0.8	0.76	LAGQNPGERAL	0.500231	HLA-A01:01
1zup_BLCL1408_F3	9975						-0.2	0.970754	FSDTATPDIKSHY	0.981358	HLA-A01:01
1zup_BLCL1408_F3	9981	-0.838889	0.655556	NSDSNLTTY	0.992833	HLA-A01:01
1zup_BLCL1408_F3	9984											-2.9	0.77	KNyCDNEDTLSSK
1zup_BLCL1408_F3	9986	-1.14267	0.618	mIDETRNSLY
1zup_BLCL1408_F3	9991											-2.7	0.76	LPANKSLAL	0.863311	HLA-B08:01
1zup_BLCL1408_F3	9999											0	0.77	LPAKTPEL	0.602402	HLA-B08:01
1zup_BLCL1408_F3	10001	-0.585187	0.914444	IADMGHLKY	0.984776	HLA-A01:01
1zup_BLCL1408_F3	10003											-0.8	0.94	NEDSPLRY	0.589111	HLA-A01:01
1zup_BLCL1408_F3	10005	-1.30771	0.943	FTDEEGYGRY	0.998778	HLA-A01:01	0.1	0.975547	FTDEEGYGRY	0.998778	HLA-A01:01
1zup_BLCL1408_F3	10006	-0.295404	0.87625	ELQNKVQL	0.839733	HLA-B08:01						-0.2	0.73	KNVQELQL
1zup_BLCL1408_F3	10012	0.171037	0.82	EGFDRSTSL	0.909774	HLA-B08:01
1zup_BLCL1408_F3	10013	-0.381321	0.915	DLGKKIAL	0.8661	HLA-B08:01
1zup_BLCL1408_F3	10015											4.5	0.77	NSGHEKTSAL	0.589544	HLA-B08:01
1zup_BLCL1408_F3	10016	-0.394396	0.947778	SAAQRLTAL	0.958476	HLA-B08:01	-1.2	0.974473	SAAQRLTAL	0.958476	HLA-B08:01
1zup_BLCL1408_F3	10018											8.4	0.88	LLPEKTKSL	0.911858	HLA-B08:01
1zup_BLCL1408_F3	10027	0.450619	0.943333	LTDADAMKY	0.998756	HLA-A01:01
1zup_BLCL1408_F3	10028											7.9	0.7	TPDSPTmAL
1zup_BLCL1408_F3	10029	-1.64012	0.896667	YTLEQQDGmDRY			-1.8	0.971872	YTLEQQDGmDRY
1zup_BLCL1408_F3	10035	0.166428	0.861111	IADmGHLKY
1zup_BLCL1408_F3	10037	0.00319665	0.965	LSDEAIKY	0.902832	HLA-A01:01	-0.7	0.922074	LSDqAKYL
1zup_BLCL1408_F3	10038	0.241074	0.952222	YADPVNAHY	0.997617	HLA-A01:01
1zup_BLCL1408_F3	10039	0.0333164	0.9625	QMSERNIL	0.669385	HLA-B08:01	0.7	0.895858	QMSERNIL	0.669385	HLA-B08:01
1zup_BLCL1408_F3	10040											-6.2	0.73	LSSPVTKSMGQSTCF	0.456255	HLA-A01:01
1zup_BLCL1408_F3	10043											-0.5	0.84	LERKVVESL	0.567916	HLA-B08:01
1zup_BLCL1408_F3	10045											7.7	0.74	LPQEKGtPL
1zup_BLCL1408_F3	10046	0.667889	0.915385	LTELGTVDPKNKY	0.897923	HLA-A01:01
1zup_BLCL1408_F3	10047	-0.353129	0.511667	RTEEGPTLSY	0.979246	HLA-A01:01
1zup_BLCL1408_F3	10050											0	0.7	LAPATKVVHL	0.550214	HLA-B08:01
1zup_BLCL1408_F3	10052	-0.160712	0.898	TLDENPGVRY	0.978981	HLA-A01:01	-0.2	0.94941	TLDENPGVRY	0.978981	HLA-A01:01
1zup_BLCL1408_F3	10053	0.895187	0.947778	VSTVLTSKY	0.824262	HLA-A01:01	-0.1	0.920022	VSTVLTSKY	0.824262	HLA-A01:01
1zup_BLCL1408_F3	10068	-0.112131	0.803333	DVMIRKEEL	0.976512	HLA-B08:01						-1	0.94	DVMLRKEEL	0.977355	HLA-B08:01
1zup_BLCL1408_F3	10071											0.5	0.7	FTDEsGKTmY
1zup_BLCL1408_F3	10072	-0.743275	0.766667	LMERNNLSY	0.895593	HLA-A01:01
1zup_BLCL1408_F3	10074	-0.526377	0.72625	DLIVHQRI	0.550704	HLA-B08:01
1zup_BLCL1408_F3	10080	-0.517508	0.813333	LLDEHHISY	0.990348	HLA-A01:01
1zup_BLCL1408_F3	10081	0.338556	0.878889	VLNNKPVSL	0.931765	HLA-B08:01	-0.3	0.95061	VLNNKPVSL	0.931765	HLA-B08:01
1zup_BLCL1408_F3	10082											-1.3	0.9	LPAEHGVL	0.562163	HLA-B08:01
1zup_BLCL1408_F3	10083											-0.8	0.72	SVNYSQVL	0.53746	HLA-B08:01
1zup_BLCL1408_F3	10084						-0.2	0.986404	STDDYFHHQDGYRY	0.991299	HLA-A01:01
1zup_BLCL1408_F3	10086											3.7	0.71	FTDEEGYMGTT	0.613097	HLA-A01:01
1zup_BLCL1408_F3	10092	0.0844206	0.768889	DLRIKSQEL	0.996382	HLA-B08:01	-0.2	0.959845	DLRIKSQEL	0.996382	HLA-B08:01
1zup_BLCL1408_F3	10094						-0.3	0.882698	EVKVQTAAL	0.939908	HLA-B08:01
1zup_BLCL1408_F3	10103	0.171319	0.925556	LLDEHHISY	0.990348	HLA-A01:01
1zup_BLCL1408_F3	10109											1.6	0.71	DGTYGDmADyAF
1zup_BLCL1408_F3	10115											1.5	0.81	TVyKQEL
1zup_BLCL1408_F3	10120	-0.623674	0.953333	DTDDEIAKY	0.992806	HLA-A01:01						-2.3	0.81	TLnDELAKY
1zup_BLCL1408_F3	10122	-0.498982	0.95	FTDEEGYGRY	0.998778	HLA-A01:01
1zup_BLCL1408_F3	10123	-0.564134	0.882727	FTSDLQDKNEY	0.956856	HLA-A01:01
1zup_BLCL1408_F3	10124						0.5	0.973774	PTDTNVLRY	0.995371	HLA-A01:01
1zup_BLCL1408_F3	10125											-1.6	0.73	LSWTKYKL	0.500352	HLA-A01:01
1zup_BLCL1408_F3	10128											0	0.73	QPLTRTVL
1zup_BLCL1408_F3	10130	-0.58545	0.946667	YVDDPYQKY	0.997692	HLA-A01:01
1zup_BLCL1408_F3	10133											4.5	0.77	SGNHEKTSAL	0.60326	HLA-B08:01
1zup_BLCL1408_F3	10135	0.0827071	0.943333	TPSERITSL	0.963878	HLA-B08:01	0.1	0.9719	TPSERITSL	0.963878	HLA-B08:01
1zup_BLCL1408_F3	10136											-0.7	0.72	LEnHHLSY
1zup_BLCL1408_F3	10137	-0.615021	0.908	LLEDKHFQSY	0.947567	HLA-A01:01
1zup_BLCL1408_F3	10138	-0.396192	0.85	YMQDRGAVL	0.846066	HLA-B08:01						-0.3	0.8	YMQDRQVL	0.831534	HLA-B08:01
1zup_BLCL1408_F3	10144	0.255967	0.936667	LTDADAMKY	0.998756	HLA-A01:01	0.3	0.936008	LTDADAMKY	0.998756	HLA-A01:01
1zup_BLCL1408_F3	10147	-0.585187	0.874444	IADMGHLKY	0.984776	HLA-A01:01
1zup_BLCL1408_F3	10149											-0.5	0.85	LDKQDLKNL	0.503982	HLA-B08:01
1zup_BLCL1408_F3	10153											-9.8	0.71	nLSHsPVL
1zup_BLCL1408_F3	10161											0.6	0.76	LDLHKETL	0.510702	HLA-B08:01
1zup_BLCL1408_F3	10166						0.1	0.967124	RTEEGPTLSY	0.979246	HLA-A01:01
1zup_BLCL1408_F3	10170											-8.1	0.75	SGDsPmTLHY
1zup_BLCL1408_F3	10174						0.3	0.989507	YVDAVLGKGHqY
1zup_BLCL1408_F3	10188	-0.0412443	0.827778	LMERNNLSY	0.895593	HLA-A01:01	0.2	0.963484	LMERNNLSY	0.895593	HLA-A01:01
1zup_BLCL1408_F3	10200						-0.8	0.923998	DGKYSQVL	0.628424	HLA-B08:01
1zup_BLCL1408_F3	10203	0.561825	0.965556	TSDVDLDKY	0.992386	HLA-A01:01	-2.3	0.950063	TSDVDLDKY	0.992386	HLA-A01:01
1zup_BLCL1408_F3	10210											0	0.73	LHLNKPQL	0.522805	HLA-B08:01
1zup_BLCL1408_F3	10213						-0.5	0.933197	NPKVQVEAI	0.849608	HLA-B08:01
1zup_BLCL1408_F3	10216											0.2	0.78	TNTKMYLL	0.508422	HLA-B08:01
1zup_BLCL1408_F3	10218											-2.5	0.74	EVKQQPNL	0.75906	HLA-B08:01
1zup_BLCL1408_F3	10221	-0.183746	0.838889	LLDEHHISY	0.990348	HLA-A01:01
1zup_BLCL1408_F3	10224											-2.4	0.83	SVDYNATEY	0.974597	HLA-A01:01
1zup_BLCL1408_F3	10227											-0.9	0.87	EVLKHEAL	0.751714	HLA-B08:01
1zup_BLCL1408_F3	10234	0.872396	0.951111	DTDDEIAKY	0.992806	HLA-A01:01						1.7	0.88	TDnDELAKY
1zup_BLCL1408_F3	10238	-1.15254	0.710909	FTSDLQDKNEY	0.956856	HLA-A01:01
1zup_BLCL1408_F3	10241											0.2	0.86	TLLTKSTL	0.780556	HLA-B08:01
1zup_BLCL1408_F3	10245	-0.263186	0.86625	FVDKPVAY	0.828364	HLA-A01:01
1zup_BLCL1408_F3	10247						2.7	0.945742	FAHTNVESL	0.655434	HLA-B08:01
1zup_BLCL1408_F3	10255											-0.9	0.77	nPDRANRFEY
1zup_BLCL1408_F3	10259						0.5	0.927051	TLRSTVAL	0.7461	HLA-B08:01
1zup_BLCL1408_F3	10262	-0.311237	0.859	LLEKEREDLY	0.886876	HLA-A01:01	-0.2	0.906051	LLEKEREDLY	0.886876	HLA-A01:01
1zup_BLCL1408_F3	10267	-0.871575	0.903333	IADMGHLKY	0.984776	HLA-A01:01
1zup_BLCL1408_F3	10268											1	0.75	SPPTKHMTV	0.865305	HLA-B08:01
1zup_BLCL1408_F3	10280											-0.5	0.9	DPnAAKGFGGKY
1zup_BLCL1408_F3	10283											-3.6	0.73	TVqETNDSAmKY
1zup_BLCL1408_F3	10290	0.410375	0.79375	LAALKQQL	0.760102	HLA-B08:01						0	0.82	LAALKQQL	0.760102	HLA-B08:01
1zup_BLCL1408_F3	10292						1.5	0.922773	TVGSRLQAL	0.891851	HLA-B08:01
1zup_BLCL1408_F3	10301											1.8	0.71	VPGEKHmTV
1zup_BLCL1408_F3	10303	-0.38549	0.93	YSDSLVQKGY	0.99512	HLA-A01:01
1zup_BLCL1408_F3	10307	-1.09115	0.960714	YNGVFQECCQAEDK	0.472038	HLA-A01:01						-1.1	0.8	YNGVFQEGCCGQAEDK	0.490126	HLA-A01:01
1zup_BLCL1408_F3	10309	-0.783807	0.764444	LLDEHHISY	0.990348	HLA-A01:01
1zup_BLCL1408_F3	10315	3.52751	0.877778	VGNLRESPL	0.660532	HLA-B08:01	2	0.974447	VGNLRESPL	0.660532	HLA-B08:01
1zup_BLCL1408_F3	10318											-2	0.8	TVEETGGDSVCKY	0.810749	HLA-A01:01
1zup_BLCL1408_F3	10325											-0.2	0.75	ELLAKSQL	0.82616	HLA-B08:01
1zup_BLCL1408_F3	10342											-2.4	0.73	SVDYNATEY	0.974597	HLA-A01:01
1zup_BLCL1408_F3	10346	2.62885	0.812222	NMEADPGQY	0.868147	HLA-A01:01
1zup_BLCL1408_F3	10357	1.21074	0.866667	VPPQKLQAL	0.915779	HLA-B08:01
1zup_BLCL1408_F3	10359	0.658375	0.792222	ATEmTLQRY			-0.8	0.898531	ATEmTLQRY
1zup_BLCL1408_F3	10362						0.2	0.906613	NTDHQTQLLYQ	0.945285	HLA-A01:01
1zup_BLCL1408_F3	10365	0.589239	0.9675	FVDKPVAY	0.828364	HLA-A01:01	0.3	0.968976	FVDKPVAY	0.828364	HLA-A01:01
1zup_BLCL1408_F3	10367	-0.311899	0.944444	ATEMTLQRY	0.98794	HLA-A01:01	-0.4	0.930678	ATEMTLQRY	0.98794	HLA-A01:01
1zup_BLCL1408_F3	10369											5.2	0.74	TAMmTLQRY
1zup_BLCL1408_F3	10371	0.227692	0.87	ASEQQALHTVQY	0.926598	HLA-A01:01
1zup_BLCL1408_F3	10373											-6.6	0.7	YSQSnFmEYY
1zup_BLCL1408_F3	10381	-1.58956	0.58	YLDEGRLRY	0.99689	HLA-A01:01						7.7	0.71	YLDYENVRL	0.712303	HLA-A01:01
1zup_BLCL1408_F3	10387											5.6	0.82	VLQQRQMAL	0.96531	HLA-B08:01
1zup_BLCL1408_F3	10388	-0.0124102	0.915556	IADMGHLKY	0.984776	HLA-A01:01
1zup_BLCL1408_F3	10389											-0.4	0.75	KNATLFQL	0.501635	HLA-B08:01
1zup_BLCL1408_F3	10397											-0.5	0.81	DPnAAKGFNKY
1zup_BLCL1408_F3	10403											-0.2	0.72	LAPARRFAL	0.866918	HLA-B08:01
1zup_BLCL1408_F3	10409	-2.37659	0.811111	FAEHNDLQY	0.985258	HLA-A01:01
1zup_BLCL1408_F3	10410						0.2	0.892041	NPLYKSAI	0.496878	HLA-B08:01
1zup_BLCL1408_F3	10419	-1.20558	0.960714	YNGVFQECCQAEDK	0.472038	HLA-A01:01						-1.1	0.83	YNGVFQEGCCGQAEDK	0.490126	HLA-A01:01
1zup_BLCL1408_F3	10420	-1.24788	0.916	YSDSLVQKGY	0.99512	HLA-A01:01	-0.2	0.987747	YSDSLVQKGY	0.99512	HLA-A01:01
1zup_BLCL1408_F3	10421	-1.57871	0.817778	SVDPTQTEY	0.995625	HLA-A01:01
1zup_BLCL1408_F3	10422	0.38752	0.945	YPNSKQLL	0.873785	HLA-B08:01						0.9	0.92	YPNSKQLL	0.873785	HLA-B08:01
1zup_BLCL1408_F3	10423											-4.8	0.77	mVEKTDTH
1zup_BLCL1408_F3	10424						-0.2	0.897818	MAPERVASL	0.896954	HLA-B08:01
1zup_BLCL1408_F3	10427	-1.28941	0.825556	YASSPGGVY	0.801395	HLA-A01:01
1zup_BLCL1408_F3	10431											7.2	0.81	YADYSYSGDTY	0.95236	HLA-A01:01
1zup_BLCL1408_F3	10437	-0.294731	0.892	HLDSDQKLLY	0.988383	HLA-A01:01	-0.4	0.966392	HLDSDQKLLY	0.988383	HLA-A01:01
1zup_BLCL1408_F3	10448											1.8	0.7	ASYEWHWFACL
1zup_BLCL1408_F3	10450											1.3	0.7	YADYnsKSEY
1zup_BLCL1408_F3	10452	1.09256	0.74125	LTEIKGSVY	0.977617	HLA-A01:01	0.6	0.894811	LTEIKGSVY	0.977617	HLA-A01:01
1zup_BLCL1408_F3	10455	0.355958	0.721111	DLVSKSSSL	0.962056	HLA-B08:01						-0.3	0.79	EVVSKSSSL	0.849848	HLA-B08:01
1zup_BLCL1408_F3	10458											-0.2	0.81	FLRETTSL	0.813021	HLA-B08:01
1zup_BLCL1408_F3	10466	-0.906638	0.963333	VIESTNLKY	0.967325	HLA-A01:01	-1.1	0.917915	VIESTNLKY	0.967325	HLA-A01:01
1zup_BLCL1408_F3	10467	1.95454	0.77	HSDPESDFY	0.998641	HLA-A01:01
1zup_BLCL1408_F3	10468						-1.2	0.941866	GLDSANEKGLY	0.886531	HLA-A01:01
1zup_BLCL1408_F3	10470	-0.0520212	0.79125	DLKNSVEV	0.545689	HLA-B08:01
1zup_BLCL1408_F3	10471											-1.7	0.81	VGDYAEMAY	0.797157	HLA-A01:01
1zup_BLCL1408_F3	10474						0.2	0.887859	TLLTSKTL	0.559479	HLA-B08:01
1zup_BLCL1408_F3	10475	-0.198267	0.758889	VPPQKLQAL	0.915779	HLA-B08:01						1.4	0.73	VPPQKLQAL	0.915779	HLA-B08:01
1zup_BLCL1408_F3	10478	-0.61584	0.7375	ITDPSLSKTDSY	0.992749	HLA-A01:01
1zup_BLCL1408_F3	10480	0.598007	0.927778	YSQADALKY	0.984252	HLA-A01:01
1zup_BLCL1408_F3	10486	-0.645248	0.928333	ASEQQALHTVQY	0.926598	HLA-A01:01	-0.4	0.993316	ASEQQALHTVQY	0.926598	HLA-A01:01
1zup_BLCL1408_F3	10496	-0.576563	0.653333	YLDEGRLRY	0.99689	HLA-A01:01
1zup_BLCL1408_F3	10498											-9.1	0.75	KCMGYYHQGYY	0.509462	HLA-A01:01
1zup_BLCL1408_F3	10509	-1.15796	0.884444	IADMGHLKY	0.984776	HLA-A01:01
1zup_BLCL1408_F3	10511						0.1	0.979758	LEDGRTLSDY	0.723803	HLA-A01:01
1zup_BLCL1408_F3	10512											3.2	0.71	TGLEKVQSL	0.934567	HLA-B08:01
1zup_BLCL1408_F3	10518	-1.44196	0.824444	HSDPESDFY	0.998641	HLA-A01:01
1zup_BLCL1408_F3	10520	-0.257196	0.753	SVDYGQTHYY	0.991545	HLA-A01:01
1zup_BLCL1408_F3	10521	-1.00038	0.786667	NLDSQRLQY	0.988566	HLA-A01:01	-1.2	0.880925	NLDSQRLQY	0.988566	HLA-A01:01
1zup_BLCL1408_F3	10522	-0.993921	0.758889	TVDARVYSY	0.974005	HLA-A01:01	0.4	0.987399	TVDARVYSY	0.974005	HLA-A01:01
1zup_BLCL1408_F3	10526	-0.456057	0.6975	TAPLRAEL	0.60239	HLA-B08:01						-0.4	0.72	TAPLRAEL	0.60239	HLA-B08:01
1zup_BLCL1408_F3	10529						-0.8	0.979718	EYEATLEECCAKD	0.274894	HLA-A01:01
1zup_BLCL1408_F3	10538						-0.6	0.893328	nIHLRSTL
1zup_BLCL1408_F3	10540	1.01088	0.96125	YPNSKQLL	0.873785	HLA-B08:01						0.9	0.97	YPNSKQLL	0.873785	HLA-B08:01
1zup_BLCL1408_F3	10541	-0.178807	0.802222	YASSPGGVY	0.801395	HLA-A01:01
1zup_BLCL1408_F3	10544						0.3	0.880806	LPSARPEL	0.741787	HLA-B08:01
1zup_BLCL1408_F3	10546											-5.4	0.76	GSDYsSSHY
1zup_BLCL1408_F3	10548	0.224097	0.96875	AEFVEVEK	0.500063	HLA-A01:01						0.7	0.89	AEFVEVGSL	0.503175	HLA-B08:01
1zup_BLCL1408_F3	10551											2.6	0.74	LPAAQKVDSL	0.536571	HLA-B08:01
1zup_BLCL1408_F3	10553											1.5	0.73	YYKsRHY
1zup_BLCL1408_F3	10554						1.5	0.90837	YRAQPSVSL	0.612371	HLA-B08:01
1zup_BLCL1408_F3	10560	-1.09115	0.96	YNGVFQECCQAEDK	0.472038	HLA-A01:01
1zup_BLCL1408_F3	10563											9.1	0.81	VGDVTYnAY
1zup_BLCL1408_F3	10571											-2.3	0.73	TLLDHRVL	0.688397	HLA-B08:01
1zup_BLCL1408_F3	10574	-1.03069	0.713333	YSQADALKY	0.984252	HLA-A01:01
1zup_BLCL1408_F3	10575											-1.2	0.7	TLYDRVVRY	0.728287	HLA-A01:01
1zup_BLCL1408_F3	10576											0.3	0.79	SGsRsLHY
1zup_BLCL1408_F3	10577											-0.8	0.75	DPVTKKVL	0.702465	HLA-B08:01
1zup_BLCL1408_F3	10578	0.367639	0.919	NLDQATRVAY	0.850455	HLA-A01:01	-0.7	0.974447	NLDQATRVAY	0.850455	HLA-A01:01
1zup_BLCL1408_F3	10579	-0.818857	0.852	ASDALDKIRY	0.963093	HLA-A01:01
1zup_BLCL1408_F3	10584	0.312836	0.816667	HSDPESDFY	0.998641	HLA-A01:01
1zup_BLCL1408_F3	10587											2	0.74	QPQNRVALL	0.896839	HLA-B08:01
1zup_BLCL1408_F3	10595	-0.535656	0.96	YSQADALKY	0.984252	HLA-A01:01
1zup_BLCL1408_F3	10608	0.29834	0.7575	VPLPKQSL	0.88378	HLA-B08:01						-0.5	0.9	VPLPKQSL	0.88378	HLA-B08:01
1zup_BLCL1408_F3	10613											0.9	0.75	LPGGGRSALL	0.509661	HLA-B08:01
1zup_BLCL1408_F3	10620											0.3	0.88	LPMSKEEL	0.762839	HLA-B08:01
1zup_BLCL1408_F3	10621											1	0.84	TPPEHPHAL
1zup_BLCL1408_F3	10628	0.403256	0.93125	YLPNKQVL	0.678691	HLA-B08:01						0.7	0.86	YLPNKQVL	0.678691	HLA-B08:01
1zup_BLCL1408_F3	10631						1.5	0.941924	DPLQKEEL	0.630468	HLA-B08:01
1zup_BLCL1408_F3	10632	-1.32147	0.616667	MPSSRAYGL	0.821064	HLA-B08:01
1zup_BLCL1408_F3	10633											2.8	0.77	LtFKHLL
1zup_BLCL1408_F3	10641	-0.178147	0.82	YVTEKVLAA	0.608211	HLA-B08:01
1zup_BLCL1408_F3	10647											-9	0.73	TAPLMKPL
1zup_BLCL1408_F3	10648											-0.8	0.74	VPAARTVL	0.806755	HLA-B08:01
1zup_BLCL1408_F3	10652						0.6	0.973351	VTELGRPDAEY	0.957254	HLA-A01:01
1zup_BLCL1408_F3	10654	-0.222387	0.89	FLDESRSTQY	0.992411	HLA-A01:01
1zup_BLCL1408_F3	10655											1.2	0.8	TFYSKTTL	0.674465	HLA-B08:01
1zup_BLCL1408_F3	10661											-8.3	0.76	SGnAtTLHY
1zup_BLCL1408_F3	10662											-5.4	0.7	GSDYSSsHY
1zup_BLCL1408_F3	10664	-0.155845	0.932222	NPQERTLTL	0.965884	HLA-B08:01	0.8	0.982065	NPQERTLTL	0.965884	HLA-B08:01
1zup_BLCL1408_F3	10666						-0.5	0.915584	FLqQKAQSL
1zup_BLCL1408_F3	10669	0.0032342	0.96125	DLIKKPTI	0.722757	HLA-B08:01						0	0.92	LDLKKPTL	0.542402	HLA-B08:01
1zup_BLCL1408_F3	10674						0.6	0.915669	ITqGTPLKY
1zup_BLCL1408_F3	10675						-0.8	0.960005	MPEVRQSSF	0.802196	HLA-B08:01
1zup_BLCL1408_F3	10677	-0.787583	0.928889	AAIQREVSL	0.878391	HLA-B08:01	0.3	0.912839	AAIQREVSL	0.878391	HLA-B08:01	-1.1	0.86	DLLRKEVL	0.803901	HLA-B08:01
1zup_BLCL1408_F3	10681	-1.54528	0.683846	ESENRSYEGTLY	0.952491	HLA-A01:01
1zup_BLCL1408_F3	10694						0.3	0.947081	MTERQDLVY	0.994758	HLA-A01:01
1zup_BLCL1408_F3	10709	-0.201005	0.766667	EIFQKSSQL	0.926358	HLA-B08:01
1zup_BLCL1408_F3	10710						1.1	0.953532	LVDqRVAEY
1zup_BLCL1408_F3	10716											3.2	0.73	SYTRALADY
1zup_BLCL1408_F3	10719	-1.12656	0.744444	AERVKAEVL	0.592485	HLA-B08:01
1zup_BLCL1408_F3	10724	1.38375	0.915	AAFEKQVL	0.710747	HLA-B08:01
1zup_BLCL1408_F3	10730	0.742196	0.851111	LTDRGVMSY	0.997116	HLA-A01:01
1zup_BLCL1408_F3	10731											-1.1	0.7	MLYLKNTT	0.507924	HLA-B08:01
1zup_BLCL1408_F3	10733											0.8	0.79	DAKLRVDQL	0.9778	HLA-B08:01
1zup_BLCL1408_F3	10734						-0.1	0.951052	SQIQRVVSM	0.852173	HLA-B08:01
1zup_BLCL1408_F3	10741											-7.5	0.77	LALTCKVSL	0.522597	HLA-B08:01
1zup_BLCL1408_F3	10743											-4.5	0.77	YPLLTHTLY	0.564763	HLA-A01:01
1zup_BLCL1408_F3	10744						-0.3	0.889639	EPNPRPVF	0.744914	HLA-B08:01
1zup_BLCL1408_F3	10749	0.608475	0.91625	YLPNKQVL	0.678691	HLA-B08:01						0.7	0.85	YLPNKQVL	0.678691	HLA-B08:01
1zup_BLCL1408_F3	10750						-0.8	0.985491	HTQGPVDGSLY	0.937257	HLA-A01:01
1zup_BLCL1408_F3	10752	-0.845247	0.95	YTEDSPGLKV	0.784217	HLA-A01:01	-0.9	0.93465	YTEDSPGLKV	0.784217	HLA-A01:01
1zup_BLCL1408_F3	10753						0.8	0.96953	YSDKEFAGSY	0.996154	HLA-A01:01
1zup_BLCL1408_F3	10754	0.671187	0.962222	VIEVDSAHY	0.905726	HLA-A01:01	2.1	0.927849	VIEVDSAHY	0.905726	HLA-A01:01
1zup_BLCL1408_F3	10757	-1.15796	0.923333	IADMGHLKY	0.984776	HLA-A01:01
1zup_BLCL1408_F3	10761	-0.444033	0.6825	VPAARSIL	0.723848	HLA-B08:01						-0.8	0.77	VPAARTVL	0.806755	HLA-B08:01
1zup_BLCL1408_F3	10763						0.6	0.893222	DLRAKAVEL	0.992292	HLA-B08:01
1zup_BLCL1408_F3	10771	0.419887	0.87	FLDESRSTQY	0.992411	HLA-A01:01	1.3	0.979718	FLDESRSTQY	0.992411	HLA-A01:01
1zup_BLCL1408_F3	10773											-0.2	0.75	FLLSRGQAA	0.620739	HLA-B08:01
1zup_BLCL1408_F3	10774						0.5	0.95056	ELRPDSPAHVL	0.566951	HLA-B08:01
1zup_BLCL1408_F3	10779	-0.348956	0.871538	GSDPDEGDEALKY	0.952818	HLA-A01:01	-0.2	0.962484	GSDPDEGDEALKY	0.952818	HLA-A01:01
1zup_BLCL1408_F3	10782	-0.155845	0.871111	NPQERTLTL	0.965884	HLA-B08:01
1zup_BLCL1408_F3	10787											-8.7	0.75	LALTMMQL	0.50102	HLA-B08:01
1zup_BLCL1408_F3	10789	-0.212379	0.96125	DLIKKPTI	0.722757	HLA-B08:01						0	0.95	LDLKKPTL	0.542402	HLA-B08:01
1zup_BLCL1408_F3	10791											9.5	0.72	FLQPDFLF
1zup_BLCL1408_F3	10793	-0.716342	0.52	ESENRSYEGTLY	0.952491	HLA-A01:01	-0.6	0.988121	ESENRSYEGTLY	0.952491	HLA-A01:01
1zup_BLCL1408_F3	10800	0.39999	0.845556	SGMVKQVAL	0.952506	HLA-B08:01	1.3	0.969316	SGMVKQVAL	0.952506	HLA-B08:01
1zup_BLCL1408_F3	10801	-0.722347	0.758889	DPMKARVVL	0.795017	HLA-B08:01
1zup_BLCL1408_F3	10802											-8.1	0.73	TMDYLMEAGY	0.771573	HLA-A01:01
1zup_BLCL1408_F3	10806											-0.8	0.76	TMDYsHGRY
1zup_BLCL1408_F3	10807	1.78205	0.915556	DPMKARVVL	0.795017	HLA-B08:01	1.5	0.963227	DPMKARVVL	0.795017	HLA-B08:01
1zup_BLCL1408_F3	10808											-8.6	0.73	SVDPsTTEY
1zup_BLCL1408_F3	10809						0	0.954224	STDSEVLTHY	0.996584	HLA-A01:01
1zup_BLCL1408_F3	10810						0.2	0.949156	DIKRVYSL	0.937233	HLA-B08:01
1zup_BLCL1408_F3	10815	-2.52382	0.62375	TPALREAL	0.79531	HLA-B08:01						-1.6	0.83	TPALREAL	0.79531	HLA-B08:01
1zup_BLCL1408_F3	10823	-1.26942	0.636667	PTKKGKEDEL	0.500197	HLA-A01:01
1zup_BLCL1408_F3	10827	-0.886053	0.837778	LTDRGVmSY			-0.8	0.941516	LTDRGVmSY
1zup_BLCL1408_F3	10828											-1.6	0.73	ATEDPCVKTNY
1zup_BLCL1408_F3	10829											7.8	0.71	DLKLGDKSF
1zup_BLCL1408_F3	10837	0.279401	0.93375	AAFEKQVL	0.710747	HLA-B08:01	-0.8	0.955399	AAFEKQVL	0.710747	HLA-B08:01
1zup_BLCL1408_F3	10840											-2.8	0.71	SVDYnATEY
1zup_BLCL1408_F3	10841	0.156545	0.93375	SGFYKNVV	0.50724	HLA-B08:01
1zup_BLCL1408_F3	10842	2.65734	0.91625	NATIRNVL	0.699075	HLA-B08:01
1zup_BLCL1408_F3	10844											-1	0.75	MAALTQRTL	0.611906	HLA-C07:01
1zup_BLCL1408_F3	10848	-0.794044	0.795556	LTDRGVMSY	0.997116	HLA-A01:01	0.3	0.949713	LTDRGVMSY	0.997116	HLA-A01:01
1zup_BLCL1408_F3	10849						-0.7	0.971703	TSDYVSQSY	0.997027	HLA-A01:01
1zup_BLCL1408_F3	10853	0.738086	0.841111	YIDEYRNDY	0.975728	HLA-A01:01	0.5	0.953393	YIDEYRNDY	0.975728	HLA-A01:01
1zup_BLCL1408_F3	10859											-7.3	0.71	MAVQYHVT	0.499302	HLA-A01:01
1zup_BLCL1408_F3	10860	-0.540702	0.71	RLDEVISKY	0.977813	HLA-A01:01						-3.7	0.71	VVWEVLSKY	0.584001	HLA-A01:01
1zup_BLCL1408_F3	10862											-0.1	0.72	TNTMDTLRY	0.719867	HLA-A01:01
1zup_BLCL1408_F3	10873	0.0664194	0.712222	SGmVKQVAL			0.8	0.895126	SGmVKQVAL
1zup_BLCL1408_F3	10879						-0.3	0.926392	ETESVRYVY	0.960787	HLA-A01:01
1zup_BLCL1408_F3	10882	-0.444033	0.78625	SPVVRVAV	0.665392	HLA-B08:01	0.1	0.968883	SPVVRVAV	0.665392	HLA-B08:01
1zup_BLCL1408_F3	10883	-0.704093	0.88	FLDESRSTQY	0.992411	HLA-A01:01
1zup_BLCL1408_F3	10886	3.87643	0.576667	DLRAKAVEL	0.992292	HLA-B08:01
1zup_BLCL1408_F3	10895	-0.648103	0.868889	DPmKARVVL
1zup_BLCL1408_F3	10896											-5	0.73	DLNVETTPY
1zup_BLCL1408_F3	10906											-8.4	0.78	KsCLFLSY
1zup_BLCL1408_F3	10907											-1.1	0.77	TmQLKTVDL
1zup_BLCL1408_F3	10910						-1.3	0.957447	SEAGSHTLQSMY	0.593831	HLA-A01:01
1zup_BLCL1408_F3	10916						0.6	0.965265	ETDHINQIGY	0.989342	HLA-A01:01
1zup_BLCL1408_F3	10917	4.68943	0.912222	SGMVKQVAL	0.952506	HLA-B08:01
1zup_BLCL1408_F3	10919											3.1	0.75	KWQNVAQAL	0.517799	HLA-B08:01
1zup_BLCL1408_F3	10920											5.5	0.89	CHMEKKVSL	0.690686	HLA-B08:01
1zup_BLCL1408_F3	10925	1.00429	0.903333	DPMKARVVL	0.795017	HLA-B08:01
1zup_BLCL1408_F3	10927											-8.6	0.75	SVDtSPTEY
1zup_BLCL1408_F3	10928	1.77551	0.71	ASDPYQVHV	0.714821	HLA-A01:01	0.6	0.903961	ASDPYQVHV	0.714821	HLA-A01:01
1zup_BLCL1408_F3	10950	1.18132	0.72625	YPPPHQVF	0.649763	HLA-B08:01						2	0.85	YPPPHQVF	0.649763	HLA-B08:01
1zup_BLCL1408_F3	10952	0.236739	0.92375	EGGIRNVL	0.599631	HLA-B08:01	0	0.883865	EGGIRNVL	0.599631	HLA-B08:01
1zup_BLCL1408_F3	10954						-4.8	0.89386	MPQNRTIYV	0.776144	HLA-B08:01
1zup_BLCL1408_F3	10956	0.760489	0.87	NISTKVAL	0.768779	HLA-B08:01
1zup_BLCL1408_F3	10958	0.156545	0.955	SGFYKNVV	0.50724	HLA-B08:01	0.6	0.981296	SGFYKNVV	0.50724	HLA-B08:01
1zup_BLCL1408_F3	10960											8.1	0.82	KDLLEACL	0.499451	HLA-A01:01
1zup_BLCL1408_F3	10961											-0.2	0.78	APQPRLSL	0.861539	HLA-B08:01
1zup_BLCL1408_F3	10969	0.898018	0.766667	YIDEYRNDY	0.975728	HLA-A01:01
1zup_BLCL1408_F3	10974	-0.843379	0.878889	YINEKNVAL	0.88909	HLA-B08:01
1zup_BLCL1408_F3	10981						-0.6	0.964457	GSARAAGYDLY	0.691577	HLA-A01:01
1zup_BLCL1408_F3	10985											-7.2	0.8	FTDGLKMVY
1zup_BLCL1408_F3	10986											-2.5	0.71	EGEFPQQHY	0.728912	HLA-A01:01
1zup_BLCL1408_F3	10987											-2.3	0.71	YNGVFEEFLECGVy
1zup_BLCL1408_F3	10994						0.4	0.959115	DVKGRIYQL	0.979669	HLA-B08:01
1zup_BLCL1408_F3	11002	-0.704093	0.757	FLDESRSTQY	0.992411	HLA-A01:01
1zup_BLCL1408_F3	11004											3.6	0.7	PTDYTKSFP	0.506501	HLA-A01:01
1zup_BLCL1408_F3	11005	-0.202053	0.88875	SPVVRVAV	0.665392	HLA-B08:01
1zup_BLCL1408_F3	11007	0.215797	0.882222	DFNVKKLAA	0.616454	HLA-B08:01
1zup_BLCL1408_F3	11010	4.32042	0.903333	TLDTKPGLY	0.994086	HLA-A01:01						3.6	0.72	DFNVKKLAA	0.616454	HLA-B08:01
1zup_BLCL1408_F3	11011						-0.6	0.985578	RSDSASSEPVGIY	0.882496	HLA-A01:01
1zup_BLCL1408_F3	11016	-0.150918	0.905556	DQQVRYNAL	0.942883	HLA-B08:01						0.3	0.9	NEQVRYNAL	0.808943	HLA-B08:01
1zup_BLCL1408_F3	11017											-0.2	0.85	DLLKKTVL	0.934937	HLA-B08:01
1zup_BLCL1408_F3	11019											5.5	0.9	LHCERERAL	0.538422	HLA-B08:01
1zup_BLCL1408_F3	11027											-0.1	0.7	PnTVGMLEKY
1zup_BLCL1408_F3	11032	-0.669822	0.85	DIVTKSAL	0.738642	HLA-B08:01
1zup_BLCL1408_F3	11036											9.3	0.7	LQLKFFSL
1zup_BLCL1408_F3	11037											-0.5	0.76	LEPKSVPV	0.488596	HLA-A01:01
1zup_BLCL1408_F3	11038	-0.212639	0.861111	ATDLTREVY	0.989462	HLA-A01:01
1zup_BLCL1408_F3	11039	0.255095	0.964545	FSELAEDKENY	0.899615	HLA-A01:01
1zup_BLCL1408_F3	11043	0.31981	0.863333	STVYDY
1zup_BLCL1408_F3	11046	3.75702	0.815556	PTDPKVVVY	0.992733	HLA-A01:01
1zup_BLCL1408_F3	11049	-0.262309	0.93	EQSIKSVL	0.640626	HLA-B08:01
1zup_BLCL1408_F3	11050						-0.5	0.974242	VTDPGEREAGASLY	0.988683	HLA-A01:01
1zup_BLCL1408_F3	11051											0.8	0.82	EELQKVVM	0.486263	HLA-B08:01
1zup_BLCL1408_F3	11058	1.18132	0.86875	YPPPHQVF	0.649763	HLA-B08:01	2	0.940513	YPPPHQVF	0.649763	HLA-B08:01
1zup_BLCL1408_F3	11060											-0.2	0.82	SPLLRATV	0.686517	HLA-B08:01
1zup_BLCL1408_F3	11061	0.516201	0.815556	LTEQYNEQY	0.995497	HLA-A01:01
1zup_BLCL1408_F3	11062	-1.7339	0.786667	ATDLTREVY	0.989462	HLA-A01:01
1zup_BLCL1408_F3	11063											-0.7	0.74	TDDLHVLDGP	0.500103	HLA-A01:01
1zup_BLCL1408_F3	11065	-1.15789	0.78375	EGYVKVQV	0.521906	HLA-B08:01						-0.3	0.72	EGYVKVGAV	0.611473	HLA-B08:01
1zup_BLCL1408_F3	11068											-0.2	0.83	APQPRLSL	0.861539	HLA-B08:01
1zup_BLCL1408_F3	11069	-0.583878	0.854444	YINEKNVAL	0.88909	HLA-B08:01
1zup_BLCL1408_F3	11070						0.3	0.900241	nSEEMKEAYY
1zup_BLCL1408_F3	11079											-9.4	0.83	YsRCDNQDTLSSK
1zup_BLCL1408_F3	11093	0.586441	0.916667	VSDYLRQSY	0.986879	HLA-A01:01
1zup_BLCL1408_F3	11098											0.5	0.88	TVLQRAPTL	0.894388	HLA-B08:01
1zup_BLCL1408_F3	11101	-0.574375	0.765556	DVKGRIYQL	0.979669	HLA-B08:01
1zup_BLCL1408_F3	11102											-2.2	0.75	TPnPKVVEF
1zup_BLCL1408_F3	11103	-1.09625	0.954286	YNGVFQECCEAEDK	0.46643	HLA-A01:01						-0.9	0.72	YNGVFEQGCCGEAEDK	0.451959	HLA-A01:01
1zup_BLCL1408_F3	11123	0.945867	0.942222	TLDTKPGLY	0.994086	HLA-A01:01	2.2	0.943131	TLDTKPGLY	0.994086	HLA-A01:01
1zup_BLCL1408_F3	11126	-0.182806	0.8525	LPNKVTEL	0.722573	HLA-B08:01						-0.7	0.89	LPNKVTEL	0.722573	HLA-B08:01
1zup_BLCL1408_F3	11129						-0.1	0.937526	DANIKSPAL	0.938987	HLA-B08:01
1zup_BLCL1408_F3	11130											2	0.73	VVLLFAETTm
1zup_BLCL1408_F3	11136						0	0.955843	SNDVGGYNY	0.86033	HLA-A01:01
1zup_BLCL1408_F3	11138											-3.2	0.73	DLLFCGAHQV	0.500415	HLA-B08:01
1zup_BLCL1408_F3	11145	0.724097	0.94	ATDLTREVY	0.989462	HLA-A01:01	0.7	0.976103	ATDLTREVY	0.989462	HLA-A01:01
1zup_BLCL1408_F3	11147						0.5	0.94134	EVKVqTAAL
1zup_BLCL1408_F3	11150	0.118593	0.905	ELPPKVSV	0.608939	HLA-B08:01						-0.5	0.81	ELPPKVSV	0.608939	HLA-B08:01
1zup_BLCL1408_F3	11151	0.403839	0.790909	FSELAEDKENY	0.899615	HLA-A01:01
1zup_BLCL1408_F3	11152	0.332586	0.947778	YVEGSFEKY	0.980747	HLA-A01:01						1.1	0.74	YVEGSFEKY	0.980747	HLA-A01:01
1zup_BLCL1408_F3	11153						2.5	0.964171	YSDSLVqKGY
1zup_BLCL1408_F3	11157	-0.391947	0.951111	KYFDEHYEY	0.551451	HLA-A01:01	-0.1	0.990702	KYFDEHYEY	0.551451	HLA-A01:01
1zup_BLCL1408_F3	11158	0.808796	0.836667	PTDPKVVVY	0.992733	HLA-A01:01
1zup_BLCL1408_F3	11163						-0.9	0.909191	DLRTRYTAL	0.997057	HLA-B08:01
1zup_BLCL1408_F3	11164											2.5	0.74	SSDYTsPY
1zup_BLCL1408_F3	11168											-0.5	0.7	LTEQCHGMQY	0.989722	HLA-A01:01
1zup_BLCL1408_F3	11169	-0.387111	0.683077	VTDPGEREAGASLY	0.988683	HLA-A01:01
1zup_BLCL1408_F3	11170	0.539311	0.904	YSDKYFDEHY	0.993745	HLA-A01:01
1zup_BLCL1408_F3	11174											-7.3	0.7	SSDYMmSY
1zup_BLCL1408_F3	11176											2.3	0.8	TEYGDMADyFA
1zup_BLCL1408_F3	11178	0.853037	0.813333	LTEQYNEQY	0.995497	HLA-A01:01
1zup_BLCL1408_F3	11179	0.144329	0.90125	EGYVKVQV	0.521906	HLA-B08:01						-0.3	0.87	EGYVKVQV	0.521906	HLA-B08:01
1zup_BLCL1408_F3	11180											-0.4	0.71	CCDAADDKEAGCFAVEGPK	0.438803	HLA-A01:01
1zup_BLCL1408_F3	11183											-0.2	0.72	APQPRLSL	0.861539	HLA-B08:01
1zup_BLCL1408_F3	11186											-1.4	0.81	VSDYLRDNY	0.986337	HLA-A01:01
1zup_BLCL1408_F3	11192											-7.2	0.75	SSDVsMmY
1zup_BLCL1408_F3	11193											-6	0.7	LYETQmDmY
1zup_BLCL1408_F3	11194											-9.6	0.79	DLKERSLNL	0.993838	HLA-B08:01
1zup_BLCL1408_F3	11198						-1	0.926171	PSDPVQPQY	0.990817	HLA-A01:01
1zup_BLCL1408_F3	11204	-1.03535	0.934444	TTEVHPELY	0.997336	HLA-A01:01
1zup_BLCL1408_F3	11209											-0.7	0.78	VASSPVTKSFNRMCC	0.475377	HLA-A01:01
1zup_BLCL1408_F3	11211	0.0557252	0.706667	VSDYLRQSY	0.986879	HLA-A01:01
1zup_BLCL1408_F3	11213											-9.6	0.79	LEKKNSLKQL	0.502482	HLA-B08:01
1zup_BLCL1408_F3	11214											0	0.75	LPPVSRAL	0.549278	HLA-B08:01
1zup_BLCL1408_F3	11218											1.3	0.82	MGYGRSLAV	0.661711	HLA-B08:01
1zup_BLCL1408_F3	11225											0	0.95	ESDSPLRY	0.943678	HLA-A01:01
1zup_BLCL1408_F3	11231						-0.2	0.942271	QSAASSLAY	0.907475	HLA-A01:01
1zup_BLCL1408_F3	11236											-6.3	0.76	SSDVHEmY
1zup_BLCL1408_F3	11237	0.155175	0.86875	VLGYKQTL	0.574165	HLA-B08:01	-0.4	0.882463	VLGYKQTL	0.574165	HLA-B08:01
1zup_BLCL1408_F3	11242											-7.9	0.7	TAEVDSSKSTAEY	0.713721	HLA-A01:01
1zup_BLCL1408_F3	11244											9.1	0.9	LTmSRPVL
1zup_BLCL1408_F3	11245	-0.0147373	0.944444	ETEDERLVY	0.991114	HLA-A01:01	0	0.912752	ETEDERLVY	0.991114	HLA-A01:01
1zup_BLCL1408_F3	11248	0.678606	0.905	IANYRPTL	0.737316	HLA-B08:01	1	0.938824	IANYRPTL	0.737316	HLA-B08:01
1zup_BLCL1408_F3	11250	-0.506189	0.79	TTEVHPELY	0.997336	HLA-A01:01
1zup_BLCL1408_F3	11251	0.34293	0.663333	YmDYRGYSY			-0.3	0.979839	YmDYRGYSY
1zup_BLCL1408_F3	11262	0.445829	0.965556	ETFYSTERY	0.882077	HLA-A01:01	-0.9	0.962634	ETFYSTERY	0.882077	HLA-A01:01
1zup_BLCL1408_F3	11267	-0.455524	0.86625	IAALKNEL	0.640282	HLA-B08:01						0.8	0.86	LAALKNEL	0.629024	HLA-B08:01
1zup_BLCL1408_F3	11270	0.443847	0.835	DLNSRNVL	0.853548	HLA-B08:01	0.6	0.900241	DLNSRNVL	0.853548	HLA-B08:01
1zup_BLCL1408_F3	11274	-0.0252919	0.907778	ATDLTREVY	0.989462	HLA-A01:01
1zup_BLCL1408_F3	11279	-0.85579	0.83	KYFDEHYEY	0.551451	HLA-A01:01
1zup_BLCL1408_F3	11280	-0.0681686	0.961111	FVETESVRY	0.983716	HLA-A01:01	0.2	0.901036	FVETESVRY	0.983716	HLA-A01:01
1zup_BLCL1408_F3	11286											-8.2	0.79	TAsADTLRY
1zup_BLCL1408_F3	11290											-3.9	0.74	SSDYCFDY	0.697424	HLA-A01:01
1zup_BLCL1408_F3	11293											9.2	0.72	TSVVKGDtAV
1zup_BLCL1408_F3	11297											0.1	0.74	LLKPESTL	0.671606	HLA-B08:01
1zup_BLCL1408_F3	11299											2.3	0.87	ETYGDMADyAF
1zup_BLCL1408_F3	11303	0.0681447	0.94125	TGYIKTEL	0.707717	HLA-B08:01	0.3	0.958164	TGYIKTEL	0.707717	HLA-B08:01
1zup_BLCL1408_F3	11307	0.348872	0.825	ELPPKVSV	0.608939	HLA-B08:01
1zup_BLCL1408_F3	11314						-0.1	0.901923	FTDRATLY	0.985533	HLA-A01:01
1zup_BLCL1408_F3	11315											0.1	0.74	LLKPSETL	0.632178	HLA-B08:01
1zup_BLCL1408_F3	11318											7.8	0.73	TTEVHYAHY	0.989165	HLA-A01:01
1zup_BLCL1408_F3	11321	1.35321	0.961111	TTEVHPELY	0.997336	HLA-A01:01
1zup_BLCL1408_F3	11326											-3.6	0.85	EYEATLEEyAENN
1zup_BLCL1408_F3	11328											-0.8	0.82	LPAGKYAL	0.724409	HLA-B08:01
1zup_BLCL1408_F3	11330	-0.846598	0.933846	ETYGDmADGDDSS								2.7	0.71	TEYGDmADyAF
1zup_BLCL1408_F3	11332											1.3	0.78	MGYGRSLAV	0.661711	HLA-B08:01
1zup_BLCL1408_F3	11334	1.40045	0.511538	VSEREANDALNAY	0.812792	HLA-A01:01
1zup_BLCL1408_F3	11336											0.1	0.82	TPQLKAVSL	0.971489	HLA-B08:01
1zup_BLCL1408_F3	11337	-0.49771	0.7775	EEMIKSEL	0.579384	HLA-B08:01
1zup_BLCL1408_F3	11341						-0.7	0.940155	YADYSGQqSTY
1zup_BLCL1408_F3	11343											0	0.93	SEDSPLRY	0.840973	HLA-A01:01
1zup_BLCL1408_F3	11347											-5.2	0.75	FFVKLTF
1zup_BLCL1408_F3	11352	-0.707104	0.748	YTDPAGLRNY	0.99907	HLA-A01:01	0.1	0.949763	YTDPAGLRNY	0.99907	HLA-A01:01
1zup_BLCL1408_F3	11365											0.9	0.75	LANYRPTL	0.737844	HLA-B08:01
1zup_BLCL1408_F3	11367	-0.629921	0.625556	YmDYRGYSY
1zup_BLCL1408_F3	11370											-0.7	0.71	VPRLGAAAL	0.746861	HLA-B08:01
1zup_BLCL1408_F3	11383	0.0577035	0.85	DALTRTEL	0.811957	HLA-B08:01						-0.6	0.81	DALTRETL	0.731603	HLA-B08:01
1zup_BLCL1408_F3	11387						0.2	0.959764	VTAADTAVY	0.912474	HLA-A01:01
1zup_BLCL1408_F3	11392	-0.999591	0.911	FSSSHEGFSY	0.925759	HLA-A01:01	-0.9	0.980649	FSSSHEGFSY	0.925759	HLA-A01:01
1zup_BLCL1408_F3	11395	-0.725203	0.816667	ETFYSTERY	0.882077	HLA-A01:01
1zup_BLCL1408_F3	11401						-0.6	0.960005	TLNTRMESL	0.927432	HLA-B08:01
1zup_BLCL1408_F3	11405											-4.8	0.73	YSDPSTASmATY
1zup_BLCL1408_F3	11411											-8.2	0.87	TAsADTLRY
1zup_BLCL1408_F3	11412	0.137188	0.92375	MSDVNLKY	0.953711	HLA-A01:01
1zup_BLCL1408_F3	11418	-1.59113	0.697273	ATDTASGTGLY	0.993799	HLA-A01:01
1zup_BLCL1408_F3	11421											2.3	0.87	ETYGDMADyAF
1zup_BLCL1408_F3	11422	-0.168539	0.699167	YSDPSTGEPATY	0.997194	HLA-A01:01
1zup_BLCL1408_F3	11423	-0.580852	0.91	TGYIKTEL	0.707717	HLA-B08:01
1zup_BLCL1408_F3	11427	-2.43954	0.7425	YSDPSTGEPATY	0.997194	HLA-A01:01
1zup_BLCL1408_F3	11434	0.225449	0.671111	STELNHLGY	0.988955	HLA-A01:01
1zup_BLCL1408_F3	11436	-0.129126	0.9025	LPQERPLM	0.714217	HLA-B08:01						-0.1	0.84	LPQERPML	0.800771	HLA-B08:01
1zup_BLCL1408_F3	11439											1.9	0.76	SSDYyDGL
1zup_BLCL1408_F3	11442	-0.116672	0.964444	TTEVHPELY	0.997336	HLA-A01:01	2.1	0.985934	TTEVHPELY	0.997336	HLA-A01:01
1zup_BLCL1408_F3	11445											0.7	0.73	QPNFRVSTV	0.829927	HLA-B08:01
1zup_BLCL1408_F3	11446											-3.6	0.84	EYEATLEEyAENN
1zup_BLCL1408_F3	11453											0.1	0.79	TPQLKAVSL	0.971489	HLA-B08:01
1zup_BLCL1408_F3	11454											2.7	0.79	TEYGDmADyFA
1zup_BLCL1408_F3	11456	1.00534	0.81	PTDPKVVVY	0.992733	HLA-A01:01
1zup_BLCL1408_F3	11457	-0.341963	0.7525	ELPPKVSV	0.608939	HLA-B08:01						-0.5	0.7	ELPKSVPV	0.513734	HLA-B08:01
1zup_BLCL1408_F3	11464											-5.2	0.8	FFVKLTF
1zup_BLCL1408_F3	11468	0.442037	0.667778	FLTTRQTL	0.806411	HLA-B08:01						0.2	0.83	FLTTRQTL	0.806411	HLA-B08:01
1zup_BLCL1408_F3	11469											-0.9	0.78	TPPPKAKL	0.650449	HLA-B08:01
1zup_BLCL1408_F3	11473	-1.0003	0.627273	QLEDGRTLSDY	0.867602	HLA-A01:01
1zup_BLCL1408_F3	11477											-1	0.72	LPKTTGVSL
1zup_BLCL1408_F3	11478											0.8	0.86	EALARQVL
1zup_BLCL1408_F3	11481											-6.2	0.7	STEVPCCLGY	0.87337	HLA-A01:01
1zup_BLCL1408_F3	11483	-2.21675	0.814444	STELNHLGY	0.988955	HLA-A01:01
1zup_BLCL1408_F3	11489	-0.0384011	0.83875	YPNKLDTI	0.518966	HLA-B08:01						-0.1	0.86	YPNSKELL	0.757778	HLA-B08:01
1zup_BLCL1408_F3	11505											3.2	0.76	NTDHSYELLY	0.99782	HLA-A01:01
1zup_BLCL1408_F3	11508	-0.39385	0.835556	RLDINTNTY	0.928453	HLA-A01:01	-0.5	0.963043	RLDINTNTY	0.928453	HLA-A01:01
1zup_BLCL1408_F3	11509											6.8	0.71	TSGCyGLRY
1zup_BLCL1408_F3	11517											0.1	0.74	LPDSAKTVP
1zup_BLCL1408_F3	11522											1.5	0.7	PVGVAQYKSL	0.49983	HLA-A01:01
1zup_BLCL1408_F3	11523	0.179557	0.81375	DIMQKESL	0.839034	HLA-B08:01
1zup_BLCL1408_F3	11525	-1.05148	0.746667	ISDAPAPAY	0.982107	HLA-A01:01
1zup_BLCL1408_F3	11526	-4.74366	0.471	QLEDSYNQVQS	0.500651	HLA-A01:01
1zup_BLCL1408_F3	11531											-8.2	0.78	TsAADTLRY
1zup_BLCL1408_F3	11541											2.3	0.87	ETYGDMADyAF
1zup_BLCL1408_F3	11543	-0.350663	0.95	AGFQRVQAL	0.926577	HLA-B08:01	0.7	0.946763	AGFQRVQAL	0.926577	HLA-B08:01
1zup_BLCL1408_F3	11544	-0.208808	0.93875	VPPLKTQL	0.728068	HLA-B08:01						0.2	0.9	VPPLKTQL	0.728068	HLA-B08:01
1zup_BLCL1408_F3	11545											1.4	0.78	SLQnAVETY
1zup_BLCL1408_F3	11552	0.806003	0.775556	STELNHLGY	0.988955	HLA-A01:01
1zup_BLCL1408_F3	11553	1.72068	0.864444	TTEVHPELY	0.997336	HLA-A01:01						-0.7	0.77	LnKQDKLDL
1zup_BLCL1408_F3	11554											1.4	0.7	NSLLREQL	0.613673	HLA-B08:01
1zup_BLCL1408_F3	11557											2	0.73	LLNTnHQPN
1zup_BLCL1408_F3	11559						-5.3	0.947398	NTDHQTQLLYQASAmMVESRY
1zup_BLCL1408_F3	11563	5.13796	0.663	NTDHQTQLLY	0.998683	HLA-A01:01
1zup_BLCL1408_F3	11564	0.118593	0.92125	ELPPKVSV	0.608939	HLA-B08:01
1zup_BLCL1408_F3	11565											2.7	0.77	TEYGDmADyAF
1zup_BLCL1408_F3	11566											0.1	0.7	TVnAPAPAY
1zup_BLCL1408_F3	11567	2.77428	0.804444	PTDPKVVVY	0.992733	HLA-A01:01
1zup_BLCL1408_F3	11569	-0.833267	0.775556	LSEAFHEEY	0.984059	HLA-A01:01
1zup_BLCL1408_F3	11571	1.28338	0.862222	YSTDENFRY	0.992083	HLA-A01:01
[truncated: 25,850 more rows]
